# Supplementary material for: Unlocking reactivity potential of gem -dihaloolefins: access to Halo-functionalized 1,4-naphthoquinones via intramolecular radical oxidative cyclization
Source: Royal Society of Chemistry journal article supplement (doi:10.1039/d5cc06222e), 2025-12-16
Supplement: d5cc06222e1.pdf [file d5cc06222e1.pdf]

## Supporting Information

# Unlocking Reactivity Potential of Gem-dihaloolefins: Access to Halo-Functionalized 1,4-Naphthoquinones via Intramolecular Radical Oxidative Cyclization

Manvi Sharma<sup>a‡</sup>, Deepika Thakur<sup>a‡</sup>, Shivam A. Meena<sup>a</sup>, Abhijit Nandy<sup>b</sup>, Shibdas Banerjee<sup>b\*</sup>  
and Akhilesh K. Verma<sup>a\*</sup>

<sup>a\*</sup> [averma@acbr.du.ac.in](mailto:averma@acbr.du.ac.in); <sup>b\*</sup> [shibdas@iisertirupati.ac.in](mailto:shibdas@iisertirupati.ac.in)

<sup>a</sup>Department of Chemistry, University of Delhi, Delhi 110007, India.

<sup>b</sup>Department of Chemistry, IISER Tirupati, Tirupati -517507, India.

<sup>‡</sup>These authors contributed equally

| S. No |                                                                                                                                           | Page No. |
|-------|-------------------------------------------------------------------------------------------------------------------------------------------|----------|
| 1     | X-Ray Crystallographic Study of compound <b>3y</b>                                                                                        | S2-S3    |
| 2     | Real time mass monitoring studies                                                                                                         | S4-S10   |
| 3     | General procedure for the synthesis of starting material ( <b>1a-ag</b> )                                                                 | S10-S11  |
| 4     | General procedure for the synthesis of 1,4-naphthoquinone derivatives products and their characterization ( <b>3a-3ag</b> ; <b>5a-e</b> ) | S11-S24  |
| 5     | Characterization of compounds ( <b>7</b> , <b>9a-b</b> )                                                                                  | S25-S26  |
| 6     | Post-Synthetic Applications ( <b>10-13</b> )                                                                                              | S26-S30  |
| 7     | References                                                                                                                                | S30-S31  |
| 8     | Copies of <sup>1</sup> H and <sup>13</sup> C NMR and HRMS                                                                                 | S31-S155 |



|                                               |                             |                  |
|-----------------------------------------------|-----------------------------|------------------|
| Crystal system                                | Monoclinic                  |                  |
| Space group                                   | P2 <sub>1</sub> /c          |                  |
| Unit cell dimensions                          | a = 10.2785 (5) Å           | α = 90.          |
|                                               | b = 14.3225 (6) Å           | β = 105.808 (5). |
|                                               | c = 9.8230 (5) Å            | γ = 90.          |
| Volume                                        | 1391.39 (12) Å <sup>3</sup> |                  |
| Z                                             | 4                           |                  |
| Density (calculated)                          | 1.648 g/cm <sup>3</sup>     |                  |
| Absorption coefficient                        | 2.966 mm <sup>-1</sup>      |                  |
| F(000)                                        | 688.0                       |                  |
| Index ranges                                  | h = 12, k = 20, l = 13      |                  |
| Reflections collected                         | 0.0342 (2853)               |                  |
| Completeness to theta = 31.051 °              | 79.6 %                      |                  |
| Final R indices [I>2 sigma(I)] <sup>a,b</sup> | R1 = 0.0342, wR2 = 0.0736   |                  |

$$^a R = \sum (|F_o| - |F_c|) / \sum |F_o|; ^b R_w = \{ \sum [w(F_o^2 - F_c^2)^2] / \sum [w(F_o^2)^2] \}^{1/2}$$

#### General Experimental Procedure General Method:

<sup>1</sup>H NMR (400 MHz) and <sup>13</sup>C NMR (100 MHz) spectra were recorded in CDCl<sub>3</sub>/DMSO-*d*<sub>6</sub>. Chemical shifts for protons and carbons are reported in ppm from tetramethylsilane and are referenced to the carbon resonance of the solvent. Data are reported as follows: chemical shift, multiplicity (s = singlet, d = doublet, t = triplet, q = quartet, m = multiplet, dd = doublet of doublet), coupling constants in Hertz and integration. High resolution mass spectra were recorded on electrospray mass spectrometer. Crystal structure analysis was accomplished on single needles X-ray diffractometer. The FT-IR analysis is carried out by Thermo Scientific Nicolet iS50 FT-IR using ATR method. TLC analysis was performed on commercially prepared 60 F254 silica gel plates and visualized by either UV irradiation or by staining with iodine. All purchased chemicals were used as received. All melting points are uncorrected.

#### Reagents:

All reagents were used directly as obtained commercially unless otherwise noted. HPLC grade ACN, THF, DMF, DMSO, Toluene, dioxane, hexanes, ethyl acetate, and DCM were purchased from Merck Chemical Co. Pd(PPh<sub>3</sub>)<sub>2</sub>Cl<sub>2</sub>, Alkynes, TBHP, DTBP, PIDA, K<sub>2</sub>S<sub>2</sub>O<sub>8</sub>, diphenyl diselenide and 2-bromobenzaldehyde derivatives were purchased from Aldrich Chemical Co., Inc.

## 2. Real time mass monitoring studies:

## (2.1) Experimental Section

All chemicals were obtained from commercial sources. LC-MS grade solvents were obtained from Thermo Fisher Scientific.

**Online ESI–MS Study.** The real-time detection of reactive intermediates was carried out using online electrospray ionization mass spectrometry (ESI-MS), employing a custom-built pressurized sample infusion system, originally developed by McIndoe and colleagues. The schematic of the experimental setup is illustrated in the top panel of Figure 1. In brief, the reaction was conducted in a Schlenk flask, where 1.0 equivalent of diphenyl selenide and 3 equivalents of *tert*-butyl hydroperoxide (TBHP) were added to 5 mL of acetonitrile (ACN) along with the starting material and heated at 120 °C. The reaction mixture was transferred from the flask by applying a 5 psi backpressure of nitrogen gas, which pushed the solution through a borosilicate capillary to a T-junction. There, it was combined with acetonitrile delivered at a flow rate of 30  $\mu$ L/min using a Hamilton syringe pump. This mixture was simultaneously subjected to a +5 kV DC high voltage to facilitate electrospray ionization. The diluted reaction stream from the T-junction was directed into a custom-designed electrospray source, where it was nebulized and sprayed into a high-resolution mass spectrometer (Orbitrap Exploris 120, Thermo Fisher Scientific). The spray system consisted of an inner fused silica capillary (100  $\mu$ m i.d., 360  $\mu$ m o.d.) for liquid delivery and an outer stainless steel coaxial capillary (0.5 mm i.d., 1.6 mm o.d.) for sheath gas delivery (nitrogen at 110 psi). To optimize nebulization, the inner silica capillary extended 1 mm beyond the orifice of the outer capillary. The resulting stream of charged microdroplets was directed toward the MS inlet, heated to 300 °C, which facilitated rapid desolvation and ion generation. The distance between the spray tip and the MS inlet was maintained at 15 mm. For data acquisition, the maximum ion injection time was set at 500 ms with a single microscan, and the mass resolution was configured to 120,000. Further tuning of ion optics was performed to maximize ion current. Data were collected using XCalibur software (Thermo Fisher Scientific). High mass accuracy and isotopic pattern analysis confirmed the identity of all key intermediates detected during the experiment.



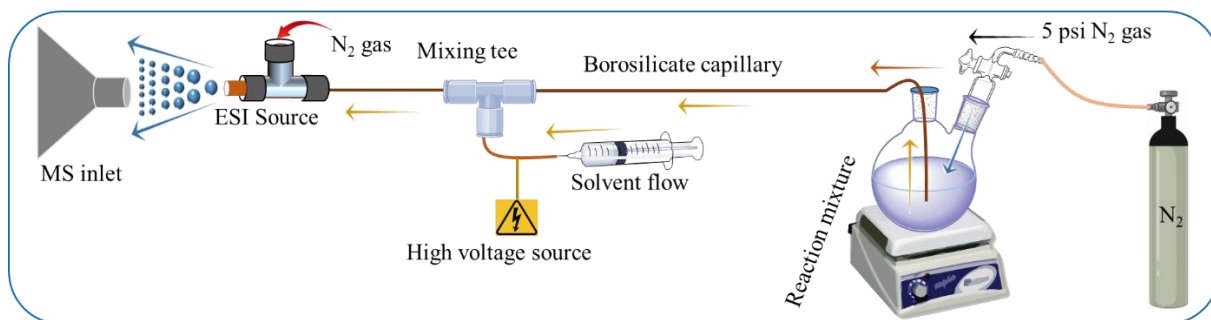

**Figure S2.** Custom-built online ESI-MS setup designed for real-time monitoring of reactants, intermediates, and products in positive ion mode throughout the course of the reaction.

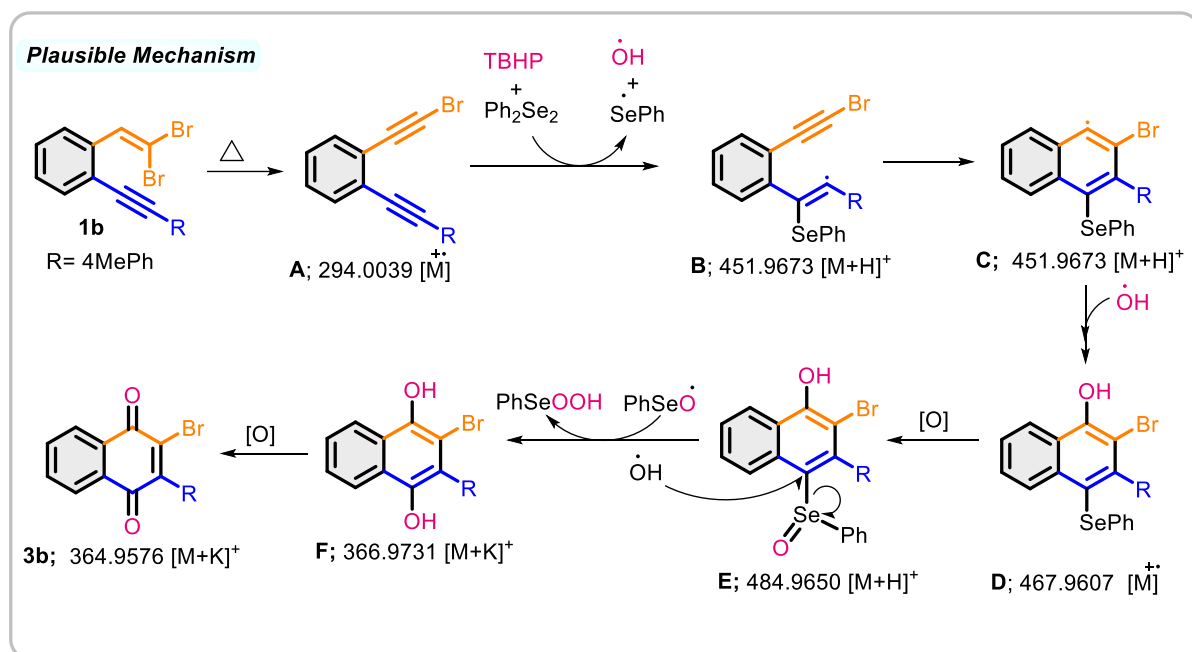

**Figure S3.** The proposed reaction mechanism includes all intermediate species identified via online mass spectrometry. Theoretical  $m/z$  values are in close agreement with the experimentally observed values.

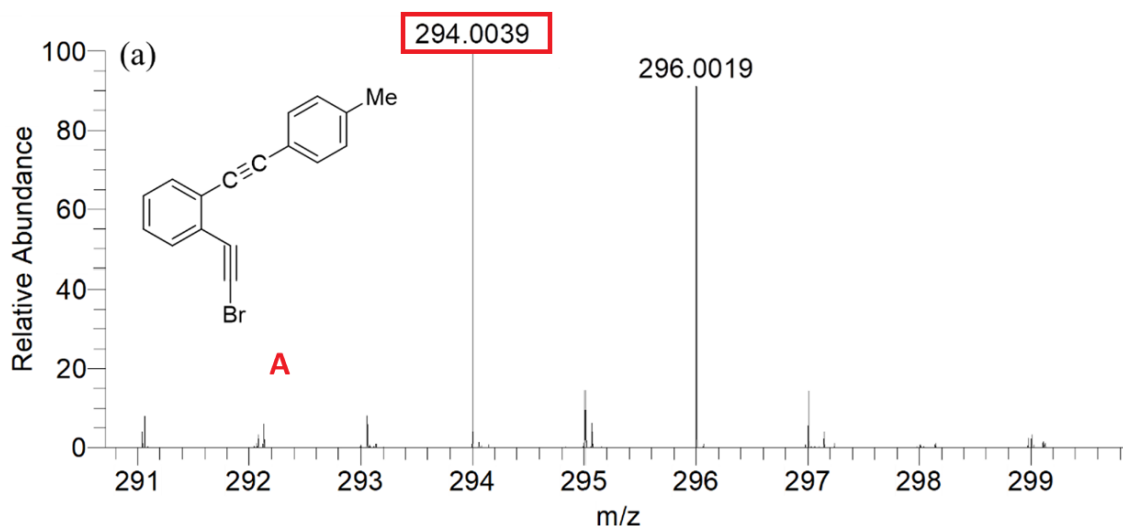

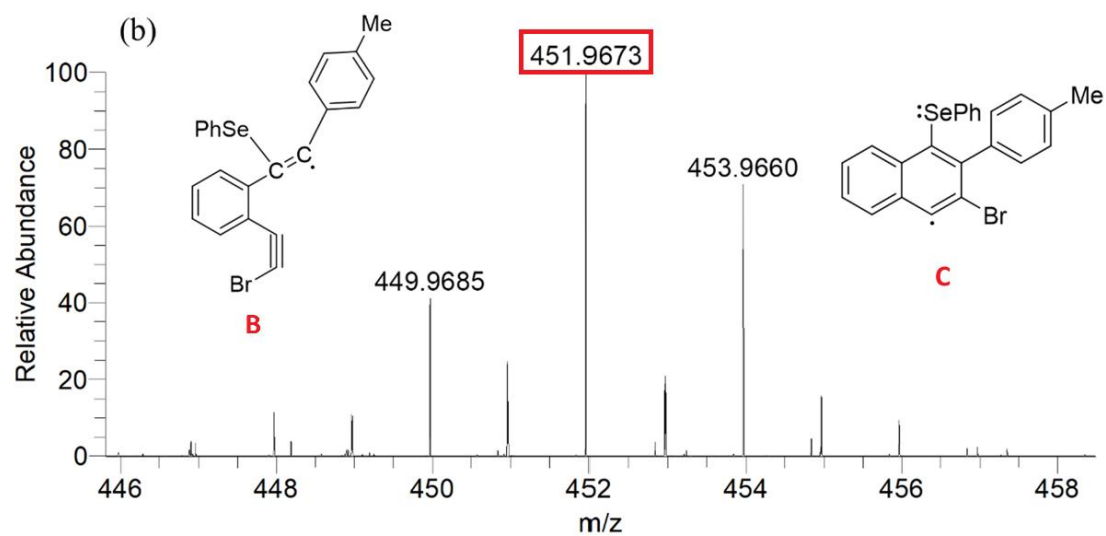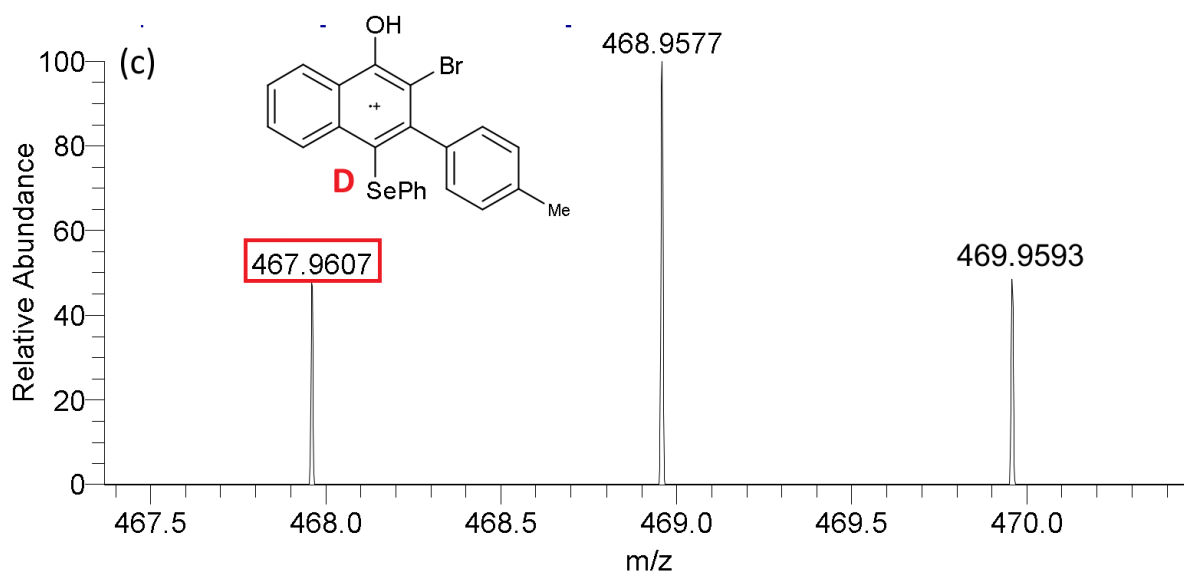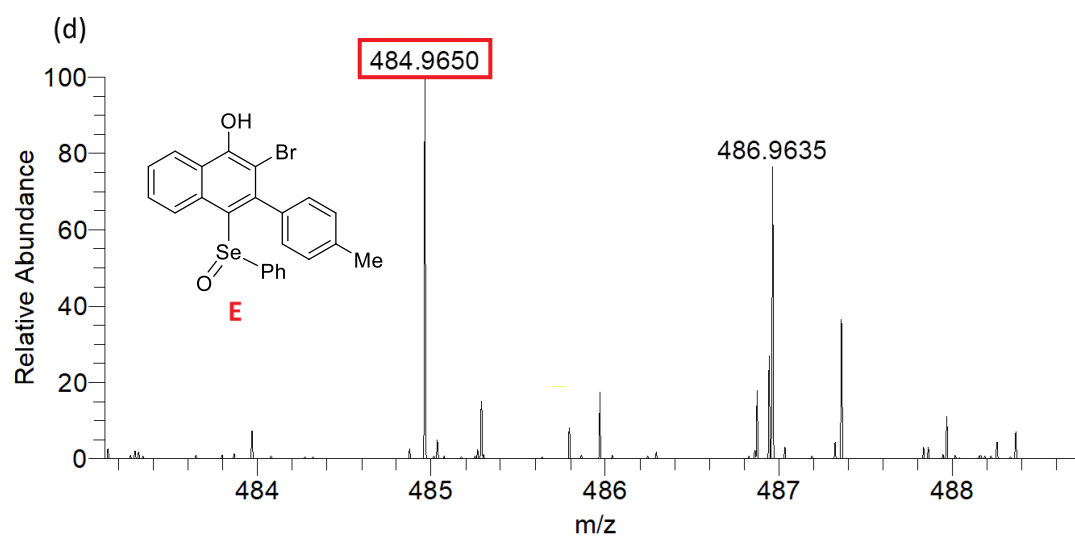

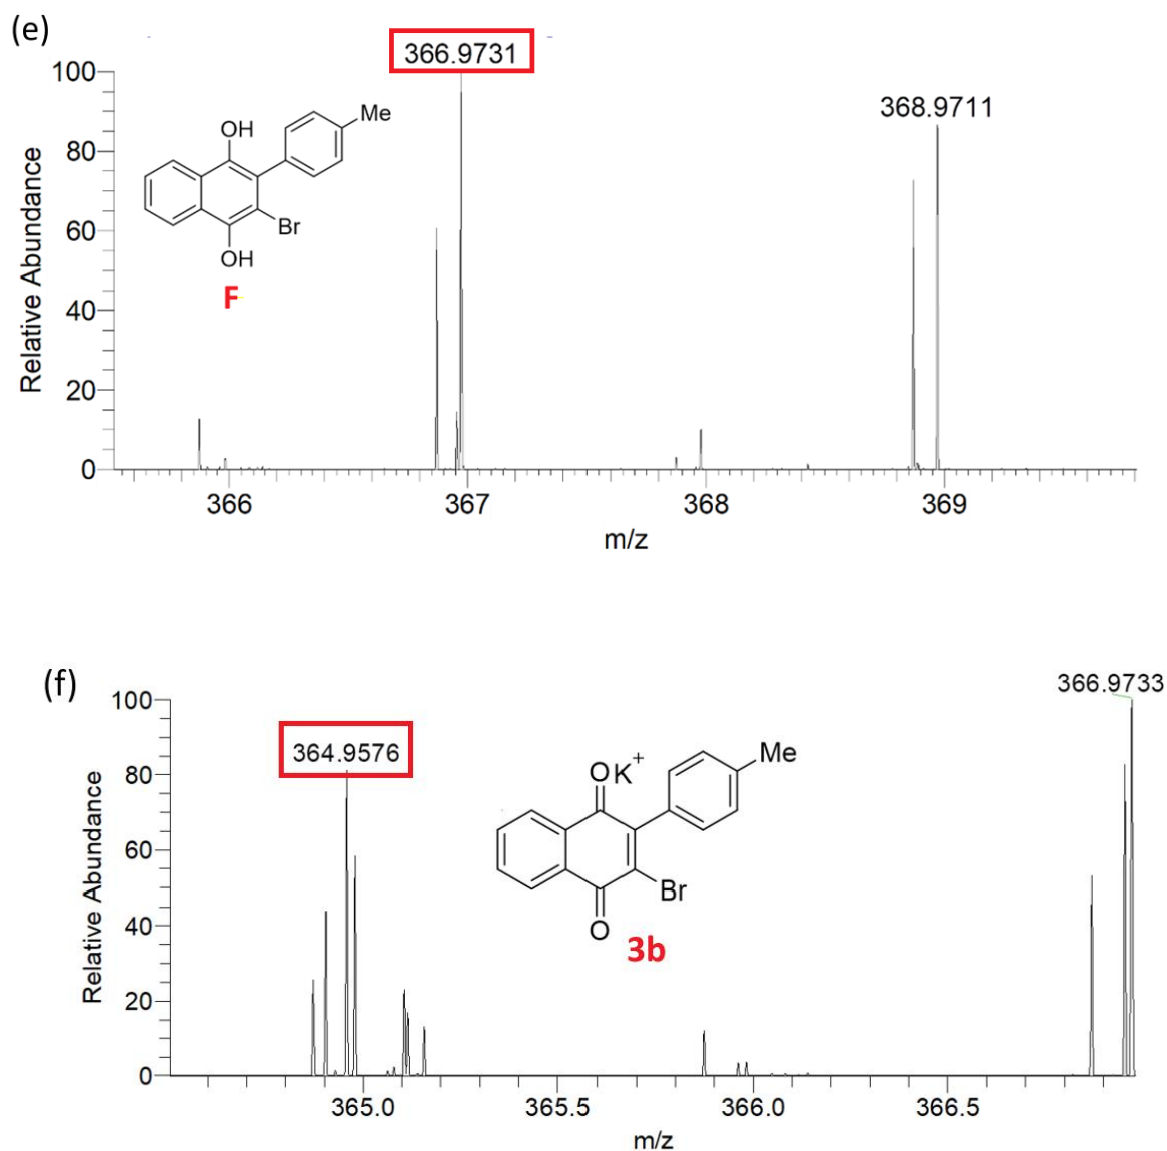

**Figure S4.** High-resolution ESI-MS spectra (a–f), acquired in positive ion mode during the reaction using the online mass spectrometric setup, are shown. The observed peaks correspond to various species generated over the course of the reaction (refer to Figure S3).

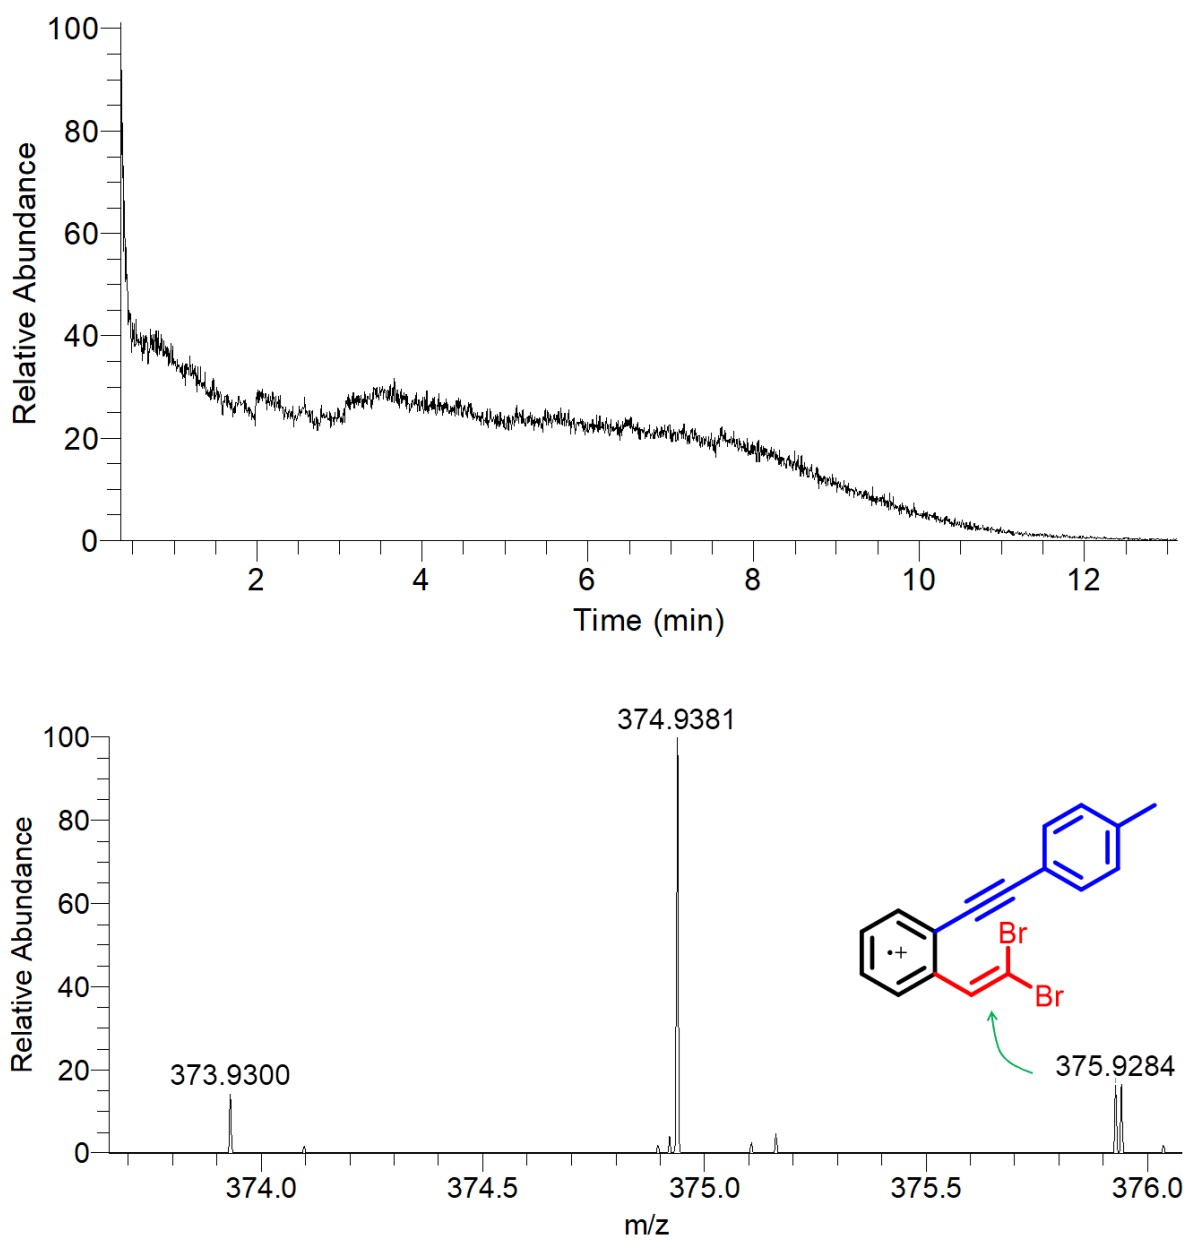

**Figure S5.** Graph showing consumption of the reactant **1b**

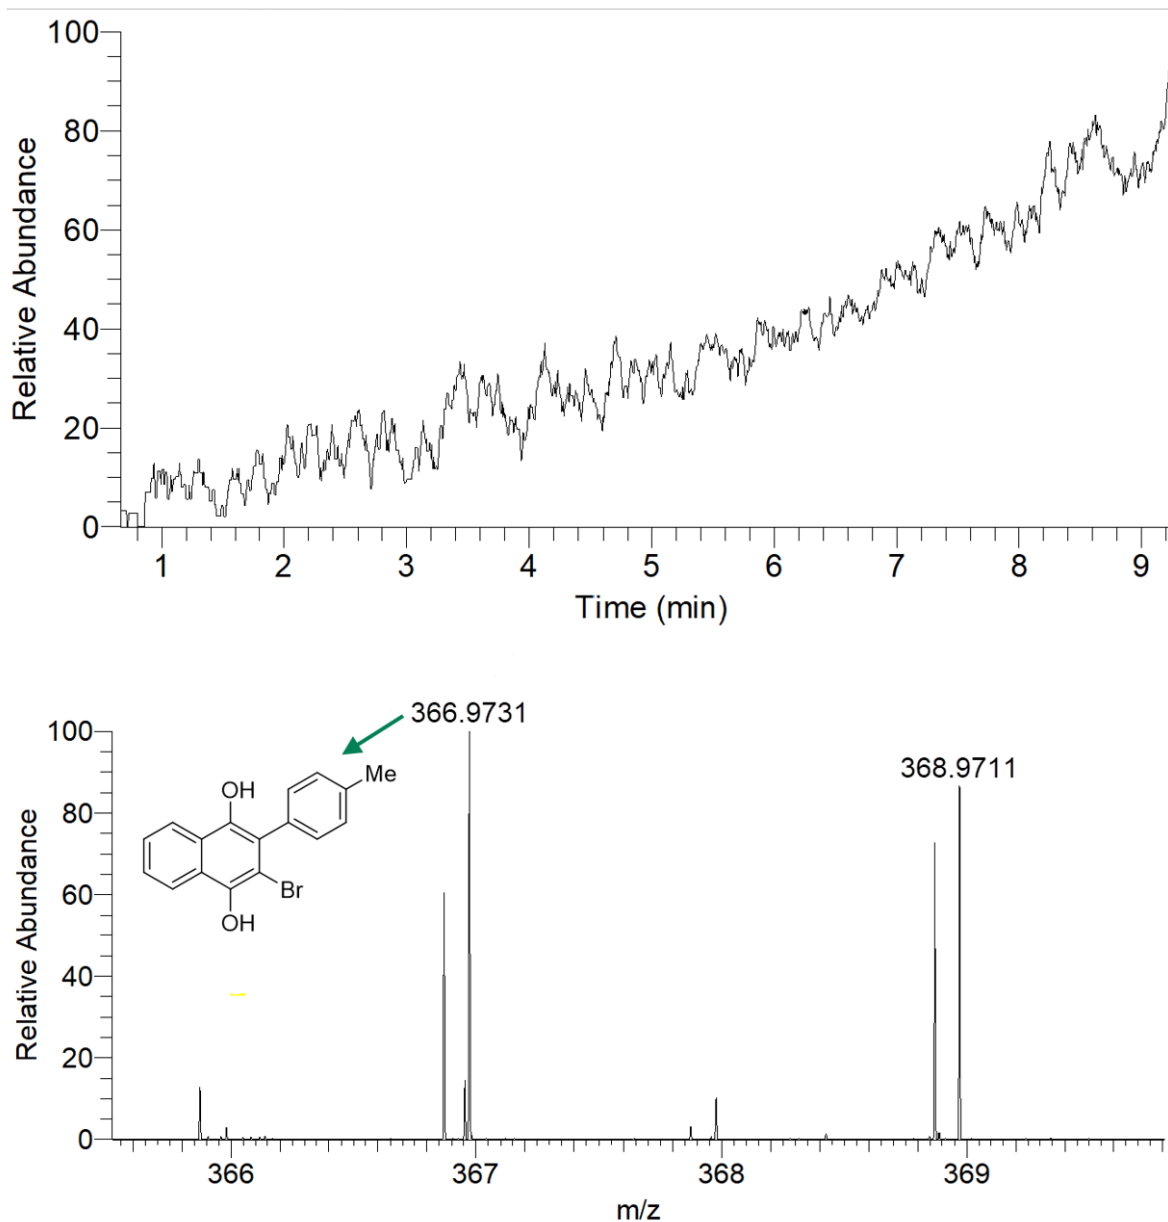

**Figure S6.** Graph showing formation of the intermediate **G**

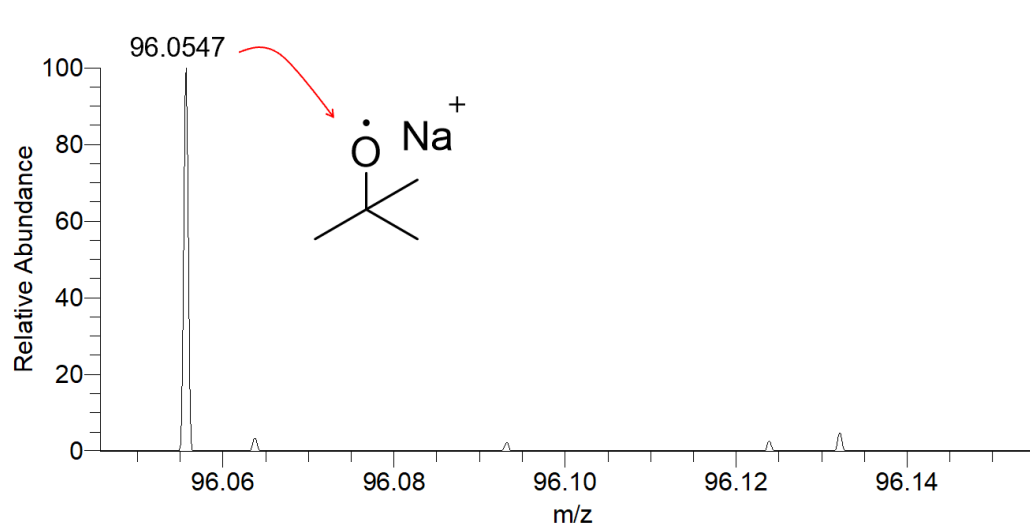

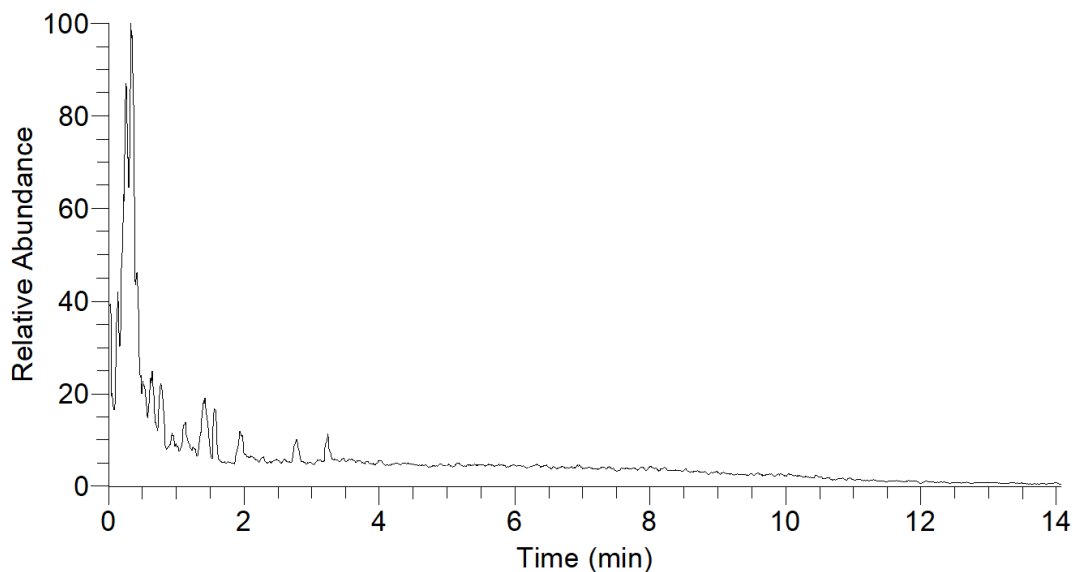

**Figure S7.** (i) Detection of *tert*-butyl radical through online ESI-MS; (ii) Graph showing the consumption of *tert*-butyl radical

### 3. General Procedure for the Synthesis of 1-(2,2-dibromovinyl)-2-(alkynyl)benzene (**1a-ag**):

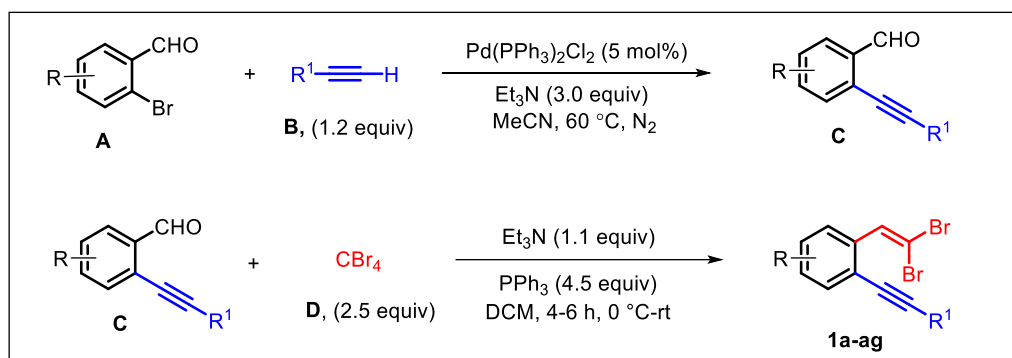

To an oven dried round bottom flask, substituted 2-bromobenzaldehyde **A** (1.0 mmol, 1.0 equiv), alkyne **B** (1.2 mmol, 1.2 equiv) and  $\text{Pd}(\text{PPh}_3)_2\text{Cl}_2$  (5 mol%, 0.05 equiv) in 5.0 ml MeCN were added. The RB flask was then sealed and flushed with nitrogen. Then,  $\text{Et}_3\text{N}$  (3.0 mmol, 3.0 equiv) was added to the reaction mixture. Afterwards the reaction was stirred at 60 °C until TLC revealed complete conversion of the starting material. After completion of the reaction, the reaction mixture was allowed to cool. Then, organic layer was washed with aqueous saturated brine solution, and finally extracted with EtOAc ( $3 \times 10$  mL). The combined organic layers were dried over  $\text{Na}_2\text{SO}_4$ , concentrated under vacuum. The crude material obtained was purified by column chromatography on silica gel (100–200 mesh) (hexane: ethyl acetate; 98/02) to afford the corresponding product **C**.

To an oven dried round bottomed flask charged with  $\text{PPh}_3$  (4.5 mmol, 4.5 equiv) and  $\text{Et}_3\text{N}$  (1.1 mmol, 1.1 equiv) in DCM (10 mL) followed by slow addition of  $\text{CBr}_4$  (2.5 mmol, 2.5 equiv) at 0 °C, 2 alkynylbenzaldehyde (**C**) (1 mmol, 1.0 equiv) was added to the mixture. This mixture was stirred at room temperature for 3-5 h. Then the reaction was quenched with water (20 mL), and extracted with ethyl acetate (20 mL x 2). The combined organic layers were dried over  $\text{Na}_2\text{SO}_4$ , concentrated under vacuum, and purified by column chromatography using 100–200 mesh size silica gel (hexane) to afford the corresponding product **1a-ag**. The structure and purity of known compounds were confirmed by comparison of their physical and NMR-spectral data ( $^1\text{H}$  NMR,  $^{13}\text{C}$  NMR and HRMS) with those reported in the literature.

### 3. General Procedure for the Synthesis of 2-bromo-3-arylnaphthalene-1,4-dione (**3a-3ag**):

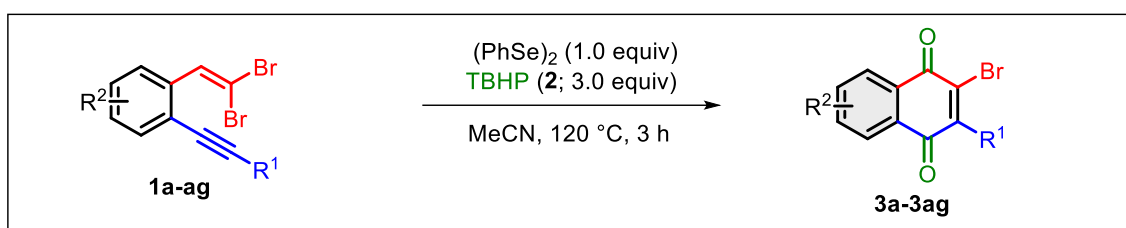

To an oven dried sealed tube, 1-(2,2-dibromovinyl)-2-(alkynyl)benzene derivatives (**1a-ag**, 0.278 mmol, 1.0 equiv), diphenyl selenide (0.278 mmol, 1.0 equiv) in MeCN was added. Then, 3.0 equiv (0.834 mmol; 0.01 M) of TBHP (**2**) was added to the reaction mixture. The reaction mixture was then stirred at 120 °C for 3 h in an oil bath. The reaction was monitored using thin layer chromatography. After completion of the reaction, the reaction mixture was allowed to cool. Then, organic layer was washed with aqueous saturated brine solution and finally extracted with EtOAc (3 × 10 mL). The combined organic layers were dried over  $\text{Na}_2\text{SO}_4$ , concentrated under vacuum. The crude material obtained was purified by column chromatography on silica gel (100–200 mesh) (hexane: ethyl acetate; 98/02) to afford the corresponding product **3a-ag**.

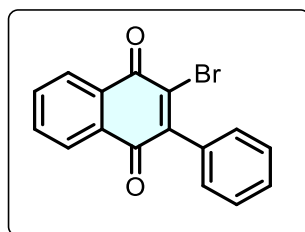

**2-Bromo-3-phenylnaphthalene-1,4-dione (3a).** The crude product was purified by column chromatography (hexane/EtOAc = 95/5) to afford **3a** orange solid (74.35 mg, 86%); mp 88-90 °C; IR (ATR, neat)  $\nu$  ( $\text{cm}^{-1}$ ): 1664 (s, C=O);  $^1\text{H}$ -NMR (400 MHz,  $\text{CDCl}_3$ )  $\delta$  8.16-8.11 (m, 1H), 8.08-8.03 (m, 1H), 7.73-7.67 (m, 2H), 7.45-7.38 (m, 3H), 7.29-7.25 (m, 2H);  $^{13}\text{C}$ -NMR (100

MHz, CDCl<sub>3</sub>)  $\delta$  181.6, 178.2, 149.9, 139.2, 134.5, 134.2, 134.1, 131.7, 131.2, 129.4, 129.2, 128.2, 127.6, 127.4; HRMS (ESI) [M+H]<sup>+</sup> Calcd for [C<sub>16</sub>H<sub>10</sub>BrO<sub>2</sub>]<sup>+</sup> 312.9864, found 312.9861.

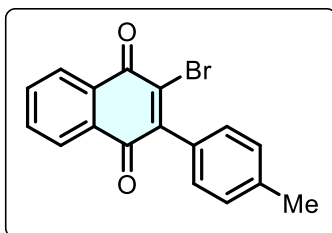

**2-Bromo-3-(*p*-tolyl)naphthalene-1,4-dione (3b)** The crude product was purified by column chromatography (hexane/EtOAc = 95/5) to afford **3b** as a orange solid (80.36 mg, 89%); mp 92-94 °C; IR (ATR, neat)  $\nu$  (cm<sup>-1</sup>): 1658 (s, C=O); <sup>1</sup>H-NMR (400 MHz, CDCl<sub>3</sub>)  $\delta$  8.04-7.98 (m, 1H), 7.98-7.92 (m, 1H), 7.62-7.56 (m, 2H), 7.16 (d, *J* = 8.0 Hz, 2H), 7.10 (d, *J* = 8.3 Hz, 2H), 2.29 (s, 3H); <sup>13</sup>C-NMR (100 MHz, CDCl<sub>3</sub>)  $\delta$  181.3, 177.9, 149.5, 139.2, 138.5, 134.1, 133.8, 131.3, 130.9, 130.8, 129.0, 128.6, 128.3, 127.2, 127.1, 21.3; HRMS (ESI) [M+H]<sup>+</sup> Calcd for [C<sub>17</sub>H<sub>12</sub>BrO<sub>2</sub>]<sup>+</sup> 327.0021, found 327.0035.

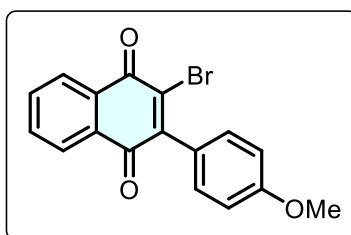

**2-Bromo-3-(4-methoxyphenyl)naphthalene-1,4-dione (3c)** The crude product was purified by column chromatography (hexane/EtOAc = 95/5) to afford **3c** as a orange solid (87.14 mg, 92%); mp 98-100 °C; IR (ATR, neat)  $\nu$  (cm<sup>-1</sup>): 1666 (s, C=O); <sup>1</sup>H-NMR (400 MHz, CDCl<sub>3</sub>)  $\delta$  8.15-8.11 (m, 1H), 8.08-8.03 (m, 1H), 7.72-7.66 (m, 2H), 7.24 (dt, *J* = 9.3, 2.4 Hz, 2H), 6.93 (dt, *J* = 9.3, 2.4 Hz, 2H), 3.79 (s, 3H); <sup>13</sup>C-NMR (100 MHz, CDCl<sub>3</sub>)  $\delta$  181.8, 178.3, 160.4, 149.3, 138.5, 134.3, 134.0, 131.6, 131.2, 131.2, 130.9, 127.5, 127.4, 126.1, 113.5, 55.4; HRMS (ESI) [M+H]<sup>+</sup> Calcd for [C<sub>17</sub>H<sub>12</sub>BrO<sub>3</sub>]<sup>+</sup> 342.9970, found 342.9982.

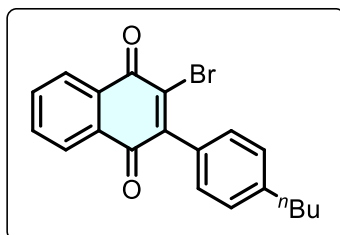



**2-Bromo-3-(4-butylphenyl)naphthalene-1,4-dione (3d)** The crude product was purified by column chromatography (hexane/EtOAc = 95/5) to afford **3d** as a orange solid (92.74 mg, 91%); mp 96-98 °C; IR (ATR, neat)  $\nu$  (cm<sup>-1</sup>): 1662 (s, C=O); <sup>1</sup>H-NMR (400 MHz, CDCl<sub>3</sub>)  $\delta$  8.12-8.06 (m, 1H), 8.04-7.99 (m, 1H), 7.69-7.62 (m, 2H), 7.21-7.14 (m, 4H), 2.59 (t,  $J$  = 7.8 Hz, 2H), 1.60-1.53 (m, 2H), 1.35-1.25 (m, 2H), 0.86 (t,  $J$  = 7.4 Hz, 3H); <sup>13</sup>C-NMR (100 MHz, CDCl<sub>3</sub>)  $\delta$  181.6, 178.2, 149.8, 144.4, 138.8, 134.3, 134.0, 131.6, 131.3, 131.2, 129.3, 128.1, 127.5, 127.4, 35.6, 33.3, 22.5, 14.0; HRMS (ESI) [M+H]<sup>+</sup> Calcd for [C<sub>20</sub>H<sub>18</sub>BrO<sub>2</sub>]<sup>+</sup> 369.0490, found 369.0492.

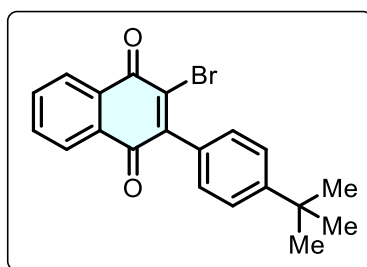

**2-Bromo-3-(4-(*tert*-butyl)phenyl)naphthalene-1,4-dione (3e)** The crude product was purified by column chromatography (hexane/EtOAc = 95/5) to afford **3e** as a orange solid (94.78 mg, 93%); mp 94-96 °C; IR (ATR, neat)  $\nu$  (cm<sup>-1</sup>): 1668 (s, C=O); <sup>1</sup>H-NMR (400 MHz, CDCl<sub>3</sub>)  $\delta$  8.15-8.09 (m, 1H), 8.07-8.02 (m, 1H), 7.71-7.65 (m, 2H), 7.42 (dt,  $J$  = 8.7, 2.0 Hz, 2H), 7.20 (dt,  $J$  = 8.6, 2.0 Hz, 2H), 1.29 (s, 9H); <sup>13</sup>C-NMR (100 MHz, CDCl<sub>3</sub>)  $\delta$  181.6, 178.2, 152.4, 149.6, 138.7, 134.3, 134.0, 131.5, 131.1, 130.9, 129.0, 127.4, 127.3, 124.9, 34.8, 31.2; HRMS (ESI) [M+H]<sup>+</sup> Calcd for [C<sub>20</sub>H<sub>18</sub>BrO<sub>2</sub>]<sup>+</sup> 369.0490, found 369.0497.

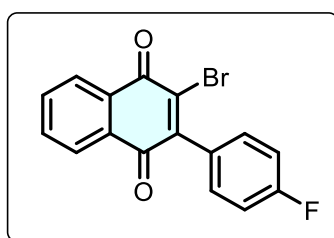

**2-Bromo-3-(4-fluorophenyl)naphthalene-1,4-dione (3f)** The crude product was purified by column chromatography (hexane/EtOAc = 95/5) to afford **3f** as a yellow solid (74.94 mg, 82%); mp 104-106 °C; IR (ATR, neat)  $\nu$  (cm<sup>-1</sup>): 1670 (s, C=O); <sup>1</sup>H-NMR (400 MHz, CDCl<sub>3</sub>)  $\delta$  8.18-8.13 (m, 1H), 8.10-8.05 (m, 1H), 7.75-7.69 (m, 2H), 7.27 (ddd,  $J$  = 11.8, 5.1, 3.0 Hz, 2H), 7.14-7.08 (m, 2H); <sup>13</sup>C-NMR (100 MHz, CDCl<sub>3</sub>)  $\delta$  181.5, 178.1, 163.2 (d,  $J_{C-F}$  = 250.7 Hz, 1C), 148.8, 139.4, 134.5, 134.2, 131.5, 131.4, 131.1, 129.9 (d,  $J_{C-F}$  = 3.6 Hz, 1C), 127.6, 127.4, 115.4 (d,

$J_{\text{C-F}} = 21.8 \text{ Hz}$ , 1C);  $^{19}\text{F}$  NMR (376 MHz,  $\text{CDCl}_3$ )  $\delta -110.83$  (s); HRMS (ESI)  $[\text{M}+\text{H}]^+$  Calcd for  $[\text{C}_{16}\text{H}_9\text{BrFO}_2]^+$  330.9770, found 330.9785.

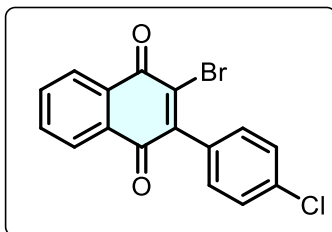

**2-Bromo-3-(4-chlorophenyl)naphthalene-1,4-dione (3g)** The crude product was purified by column chromatography (hexane/EtOAc = 95/5) to afford **3g** as a yellow solid (80.58 mg, 84%); mp 108-110 °C; IR (ATR, neat)  $\nu$  ( $\text{cm}^{-1}$ ): 1666 (s, C=O);  $^1\text{H}$ -NMR (400 MHz,  $\text{CDCl}_3$ )  $\delta$  8.15-8.10 (m, 1H), 8.07-8.02 (m, 1H), 7.73-7.67 (m, 2H), 7.40-7.36 (m, 2H), 7.21-7.18 (m, 2H);  $^{13}\text{C}$ -NMR (100 MHz,  $\text{CDCl}_3$ )  $\delta$  181.4, 178.1, 148.8, 139.5, 135.7, 134.6, 134.3, 132.4, 131.6, 131.2, 130.9, 128.6, 127.8, 127.6; HRMS (ESI)  $[\text{M}+\text{H}]^+$  Calcd for  $[\text{C}_{16}\text{H}_9\text{BrClO}_2]^+$  346.9474, found 346.9472.

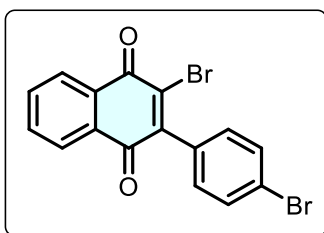

**2-Bromo-3-(4-bromophenyl)naphthalene-1,4-dione (3h)** The crude product was purified by column chromatography (hexane/EtOAc = 95/5) to afford **3h** as a yellow solid (89.81 mg, 83%); mp 108-110 °C; IR (ATR, neat)  $\nu$  ( $\text{cm}^{-1}$ ): 1662 (s, C=O);  $^1\text{H}$ -NMR (400 MHz,  $\text{CDCl}_3$ )  $\delta$  8.15-8.13 (m, 1H), 8.07-8.04 (m, 1H), 7.72-7.69 (m, 2H), 7.55 (d,  $J = 8.4 \text{ Hz}$ , 2H), 7.14 (d,  $J = 8.5 \text{ Hz}$ , 2H);  $^{13}\text{C}$ -NMR (100 MHz,  $\text{CDCl}_3$ )  $\delta$  181.2, 177.9, 148.7, 139.3, 134.5, 134.2, 132.7, 131.4, 131.0, 130.9, 127.6, 127.4, 123.8; HRMS (ESI)  $[\text{M}+\text{H}]^+$  Calcd for  $[\text{C}_{16}\text{H}_9\text{Br}_2\text{O}_2]^+$  390.8969, found 390.8973.

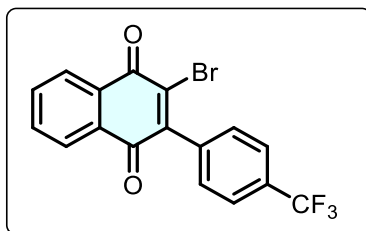

**2-Bromo-3-(4-(trifluoromethyl)phenyl)naphthalene-1,4-dione (3i)** The crude product was purified by column chromatography (hexane/EtOAc = 95/5) to afford **3i** as a yellow solid (75.74 mg, 72%); mp 142-144 °C; IR (ATR, neat)  $\nu$  (cm<sup>-1</sup>): 1672 (s, C=O); <sup>1</sup>H-NMR (400 MHz, CDCl<sub>3</sub>)  $\delta$  8.20-8.15 (m, 1H), 8.11-8.06 (m, 1H), 7.77-7.72 (m, 2H), 7.69 (d,  $J$  = 8.1 Hz, 2H), 7.39 (d,  $J$  = 8.1 Hz, 2H); <sup>13</sup>C-NMR (100 MHz, CDCl<sub>3</sub>)  $\delta$  181.2, 177.8, 148.5, 139.7, 137.5, 134.6, 134.3, 131.4, 131.0, 129.6, 127.7, 127.5, 125.2, 123.8 (q,  $J_{C-F}$  = 272.9 Hz, 1C) ; <sup>19</sup>F NMR (376 MHz, CDCl<sub>3</sub>)  $\delta$  -62.62 (s, CF<sub>3</sub>); HRMS (ESI) [M+H]<sup>+</sup> Calcd for [C<sub>17</sub>H<sub>9</sub>BrF<sub>3</sub>O<sub>2</sub>]<sup>+</sup> 380.9738, found 380.9735.

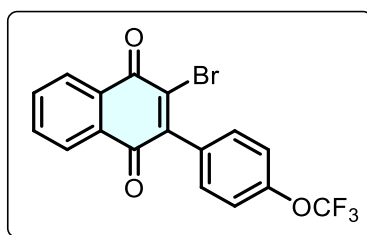

**2-Bromo-3-(4-(trifluoromethoxy)phenyl)naphthalene-1,4-dione (3j)** The crude product was purified by column chromatography (hexane/EtOAc = 95/5) to afford **3j** as a orange solid (76.73 mg, 70%); mp 148–150 °C; IR (ATR, neat)  $\nu$  (cm<sup>-1</sup>): 1664 (s, C=O); <sup>1</sup>H-NMR (400 MHz, CDCl<sub>3</sub>)  $\delta$  8.14-8.09 (m, 1H), 8.06-8.01 (m, 1H), 7.73-7.67 (m, 2H), 7.30 (dt,  $J$  = 9.0, 2.3 Hz, 2H), 7.24 (d,  $J$  = 8.0 Hz, 2H); <sup>13</sup>C-NMR (100 MHz, CDCl<sub>3</sub>)  $\delta$  181.3, 177.9, 149.8, 148.5, 139.6, 134.5, 134.2, 132.4, 131.5, 131.1, 127.6, 127.4, 120.5 (q,  $J_{C-F}$  = 258.9 Hz, 1C), 120.4; <sup>19</sup>F NMR (376 MHz, CDCl<sub>3</sub>)  $\delta$  -57.52 (s, CF<sub>3</sub>); HRMS (ESI) [M+H]<sup>+</sup> Calcd for [C<sub>17</sub>H<sub>9</sub>BrF<sub>3</sub>O<sub>3</sub>]<sup>+</sup> 396.9687, found 396.9693.

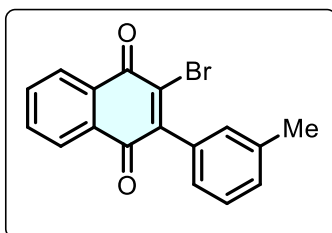

**2-Bromo-3-(*m*-tolyl)naphthalene-1,4-dione (3m)** The crude product was purified by column chromatography (hexane/EtOAc = 95/5) to afford **3m** as a orange solid (76.75 mg, 85%); mp 92-94 °C; IR (ATR, neat)  $\nu$  (cm<sup>-1</sup>): 1658 (s, C=O); <sup>1</sup>H-NMR (400 MHz, CDCl<sub>3</sub>)  $\delta$  8.17-8.12 (m, 1H), 8.09-8.04 (m, 1H), 7.74-7.68 (m, 2H), 7.33-7.28 (m, 1H), 7.21 (d,  $J$  = 7.7 Hz, 1H), 7.05-7.04 (m, 2H), 2.35 (s, 3H) ; <sup>13</sup>C-NMR (100 MHz, CDCl<sub>3</sub>)  $\delta$  181.6, 178.2, 150.0, 139.0,

137.8, 134.4, 134.0, 131.5, 131.1, 130.1, 129.5, 128.0, 127.5, 127.3, 126.1, 21.5; HRMS (ESI)  $[M+H]^+$  Calcd for  $[C_{17}H_{12}BrO_2]^+$  327.0021, found 327.0035.

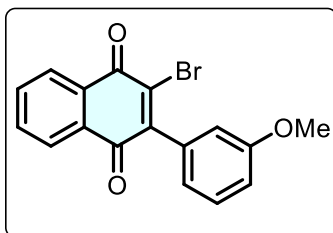

**2-Bromo-3-(3-methoxyphenyl)naphthalene-1,4-dione (3n).** The crude product was purified by column chromatography (hexane/EtOAc = 95/5) to afford **3n** as a orange solid (80.50 mg, 85%); mp 98-100 °C; IR (ATR, neat)  $\nu$  ( $cm^{-1}$ ): 1667 (s, C=O);  $^1H$ -NMR (400 MHz,  $CDCl_3$ )  $\delta$  8.19-8.13 (m, 1H), 8.10-8.05 (m, 1H), 7.75-7.69 (m, 2H), 7.34 (t,  $J$  = 8.0 Hz, 1H), 6.94 (dd,  $J$  = 8.3, 2.3 Hz, 1H), 6.82 (d,  $J$  = 7.6 Hz, 1H), 6.78-6.77 (m, 1H), 3.77 (s, 3H);  $^{13}C$ -NMR (100 MHz,  $CDCl_3$ )  $\delta$  181.4, 178.2, 159.2, 149.7, 139.2, 135.3, 134.4, 134.1, 131.6, 129.3, 127.5, 127.4, 121.3, 114.9, 114.7, 55.3; HRMS (ESI)  $[M+H]^+$  Calcd for  $[C_{17}H_{12}BrO_3]^+$  342.9970, found 342.9982.

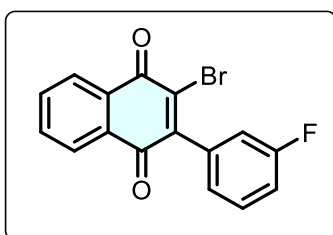

**2-Bromo-3-(3-fluorophenyl)naphthalene-1,4-dione (3o)** The crude product was purified by column chromatography (hexane/EtOAc = 95/5) to afford **3o** as a yellow solid (71.29 mg, 78%); mp 102-104 °C; IR (ATR, neat)  $\nu$  ( $cm^{-1}$ ): 1670 (s, C=O);  $^1H$ -NMR (400 MHz,  $CDCl_3$ )  $\delta$  8.19-8.14 (m, 1H), 8.11-8.05 (m, 1H), 7.77-7.70 (m, 2H), 7.40 (td,  $J$  = 8.0, 5.8 Hz, 1H), 7.10 (tdd,  $J$  = 8.5, 2.6, 0.9 Hz, 1H), 7.05-7.02 (m, 1H), 6.98 (ddd,  $J$  = 9.3, 2.5, 1.6 Hz, 1H);  $^{13}C$ -NMR (100 MHz,  $CDCl_3$ )  $\delta$  181.2, 178.0, 162.3 (d,  $J_{C-F}$  = 247.8 Hz, 1C), 148.6, 139.6, 135.9, 135.8, 134.5, 134.2, 131.2 (d,  $J_{C-F}$  = 39.7 Hz, 1C), 129.8 (d,  $J_{C-F}$  = 2.9 Hz, 1C), 127.6, 127.4, 124.9 (d,  $J_{C-F}$  = 2.9 Hz, 1C), 116.5 (d,  $J_{C-F}$  = 11.6 Hz, 1C), 116.3 (d,  $J_{C-F}$  = 8.7 Hz, 1C);  $^{19}F$  NMR (376 MHz,  $CDCl_3$ )  $\delta$  -112.73 (s); HRMS (ESI)  $[M+H]^+$  Calcd for  $[C_{16}H_9BrFO_2]^+$  330.9770, found 330.9785.

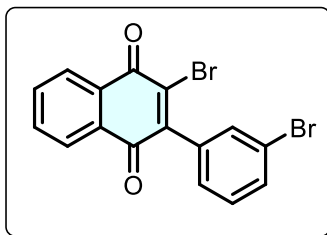

**2-Bromo-3-(3-bromophenyl)naphthalene-1,4-dione (3p)** The crude product was purified by column chromatography (hexane/EtOAc = 95/5) to afford **3p** as a yellow solid (81.15 mg, 75%); mp 106-108 °C; IR (ATR, neat)  $\nu$  (cm<sup>-1</sup>): 1662 (s, C=O); <sup>1</sup>H-NMR (400 MHz, CDCl<sub>3</sub>)  $\delta$  8.19-8.14 (m, 1H), 8.10-8.05 (m, 1H), 7.77-7.70 (m, 2H), 7.54 (dq,  $J$  = 8.0, 1.0 Hz, 1H), 7.41 (t,  $J$  = 1.7 Hz, 1H), 7.30 (t,  $J$  = 7.8 Hz, 1H), 7.19 (dt,  $J$  = 7.6, 1.3 Hz, 1H); <sup>13</sup>C-NMR (100 MHz, CDCl<sub>3</sub>)  $\delta$  181.2, 177.9, 148.3, 139.6, 135.8, 134.6, 134.2, 132.3, 132.0, 131.4, 131.0, 129.7, 127.8, 127.7, 127.4, 122.0; HRMS (ESI) [M+H]<sup>+</sup> Calcd for [C<sub>16</sub>H<sub>9</sub>Br<sub>2</sub>O<sub>2</sub>]<sup>+</sup> 390.8969, found 390.8973.

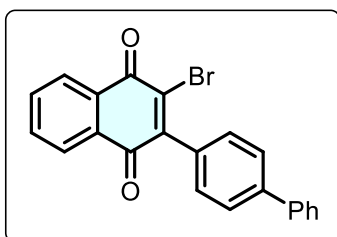

**2-Bromo-3-(4-butylphenyl)naphthalene-1,4-dione (3q)** The crude product was purified by column chromatography (hexane/EtOAc = 95/5) to afford **3q** as a orange solid (96.69 mg, 90%); mp 114-116 °C; IR (ATR, neat)  $\nu$  (cm<sup>-1</sup>): 1662 (s, C=O); <sup>1</sup>H-NMR (400 MHz, CDCl<sub>3</sub>)  $\delta$  8.12-8.07 (m, 1H), 8.05-8.00 (m, 1H), 7.68-7.62 (m, 2H), 7.59 (d,  $J$  = 8.2 Hz, 2H), 7.54-7.52 (m, 2H), 7.29-7.38 (m, 4H), 7.23-7.29 (m, 1H); <sup>13</sup>C-NMR (100 MHz, CDCl<sub>3</sub>)  $\delta$  181.5, 178.0, 149.3, 142.0, 140.2, 138.9, 134.3, 134.0, 132.7, 131.4, 131.0, 129.8, 128.8, 127.7, 127.4, 127.3, 127.1, 126.6; HRMS (ESI) [M+H]<sup>+</sup> Calcd for [C<sub>22</sub>H<sub>14</sub>BrO<sub>2</sub>]<sup>+</sup> 389.0177, found 389.0171.

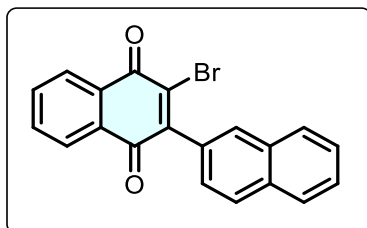

**3-Bromo-[2,2'-binaphthalene]-1,4-dione (3r)** The crude product was purified by column chromatography (hexane/EtOAc = 95/5) to afford **3r** as a red solid (85.21 mg, 85%); mp 116-118 °C; IR (ATR, neat)  $\nu$  (cm<sup>-1</sup>): 1664 (s, C=O); <sup>1</sup>H-NMR (400 MHz, CDCl<sub>3</sub>)  $\delta$  8.17-8.11 (m, 1H), 8.10-8.09 (m, 1H), 7.88-7.82 (m, 3H), 7.77-7.71 (m, 3H), 7.49-7.48 (m, 2H), 7.35 (dd,  $J$  = 5.6, 1.6 Hz, 1H); <sup>13</sup>C-NMR (100 MHz, CDCl<sub>3</sub>)  $\delta$  181.7, 178.2, 149.7, 139.3, 134.4, 134.1, 133.4, 132.6, 131.5, 131.4, 131.1, 129.2, 128.5, 127.8, 127.7, 127.6, 127.4, 127.1, 126.5, 126.3; HRMS (ESI) [M+H]<sup>+</sup> Calcd for [C<sub>20</sub>H<sub>12</sub>BrO<sub>2</sub>]<sup>+</sup> 363.0021, found 363.0025.

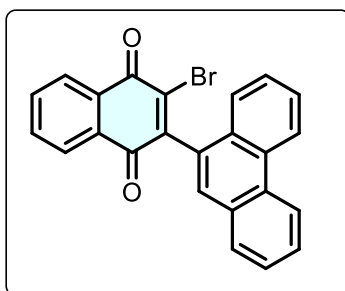

**2-Bromo-3-(phenanthren-9-yl)naphthalene-1,4-dione (3s)** The crude product was purified by column chromatography (hexane/EtOAc = 95/5) to afford **3s** as a red solid (99.23 mg, 87%); mp 120-122 °C; IR (ATR, neat)  $\nu$  (cm<sup>-1</sup>): 1662 (s, C=O); <sup>1</sup>H-NMR (400 MHz, CDCl<sub>3</sub>)  $\delta$  8.69 (q,  $J$  = 8.5 Hz, 2H), 8.25-8.21 (m, 1H), 8.11-8.08 (m, 1H), 7.84 (d,  $J$  = 7.7 Hz, 1H), 7.76-7.71 (m, 2H), 7.67-7.54 (m, 5H), 7.47 (t,  $J$  = 7.5 Hz, 1H); <sup>13</sup>C-NMR (100 MHz, CDCl<sub>3</sub>)  $\delta$  181.5, 178.0, 150.1, 141.3, 134.5, 134.2, 131.7, 131.3, 131.2, 130.8, 130.7, 130.4, 129.1, 128.8, 127.7, 127.6, 127.5, 127.0, 127.0, 125.3, 123.3, 122.7; HRMS (ESI) [M+H]<sup>+</sup> Calcd for [C<sub>24</sub>H<sub>14</sub>BrO<sub>2</sub>]<sup>+</sup> 413.0177, found 413.0184.

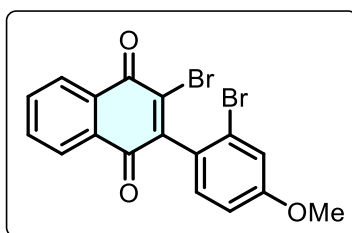

**2-Bromo-3-(2-bromo-4-methoxyphenyl)naphthalene-1,4-dione (3t)** The crude product was purified by column chromatography (hexane/EtOAc = 90/10) to afford **3t** as a orange solid (83.87 mg, 72%); mp 128-130 °C; IR (ATR, neat)  $\nu$  (cm<sup>-1</sup>): 1666 (s, C=O); <sup>1</sup>H-NMR (400 MHz, CDCl<sub>3</sub>)  $\delta$  8.21-8.15 (m, 1H), 8.12-8.08 (m, 1H), 7.77-7.71 (m, 2H), 7.50 (d,  $J$  = 8.9 Hz, 1H), 6.82 (dd,  $J$  = 8.9, 3.0 Hz, 1H), 6.68 (d,  $J$  = 3.0 Hz, 1H), 3.75 (s, 3H); <sup>13</sup>C-NMR (100 MHz,

CDCl<sub>3</sub>)  $\delta$  180.4, 177.9, 158.8, 149.9, 140.3, 136.7, 134.5, 134.2, 133.5, 131.5, 131.1, 127.7, 127.5, 116.5, 115.2, 112.1, 55.6; HRMS (ESI) [M+H]<sup>+</sup> Calcd for [C<sub>17</sub>H<sub>11</sub>Br<sub>2</sub>O<sub>3</sub>]<sup>+</sup> 420.9075, found 420.9072.

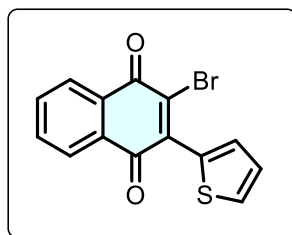

**2-Bromo-3-(thiophen-2-yl)naphthalene-1,4-dione (3u)** The crude product was purified by column chromatography (hexane/EtOAc = 95/5) to afford **3u** as a orange solid (57.26 mg, 65%); mp 90-92 °C; IR (ATR, neat)  $\nu$  (cm<sup>-1</sup>): 1666 (s, C=O); <sup>1</sup>H-NMR (400 MHz, CDCl<sub>3</sub>)  $\delta$  8.22-8.16 (m, 1H), 8.16-8.11 (m, 1H), 7.80-7.74 (m, 2H), 7.68 (q, *J* = 1.4 Hz, 1H), 7.42 (dd, *J* = 5.0, 3.0 Hz, 1H), 7.30 (dd, *J* = 5.0, 1.3 Hz, 1H); <sup>13</sup>C-NMR (100 MHz, CDCl<sub>3</sub>)  $\delta$  181.4, 178.2, 144.7, 138.1, 134.3, 134.1, 132.9, 131.6, 131.0, 129.3, 129.1, 127.5, 127.4, 124.6; HRMS (ESI) [M+H]<sup>+</sup> Calcd for [C<sub>14</sub>H<sub>8</sub>BrO<sub>2</sub>S]<sup>+</sup> 318.9428, found 318.9441.

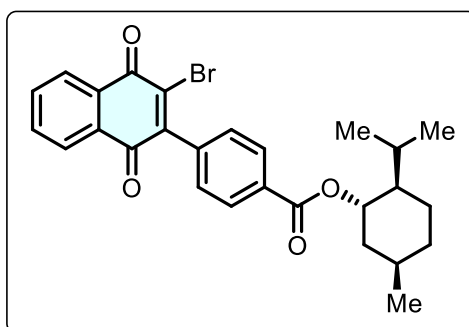

**2-Isopropyl-5-methylcyclohexyl 4-(3-bromo-1,4-dioxo-1,4-dihydronaphthalen-2-yl)benzoate (3v)** The crude product was purified by column chromatography (hexane/EtOAc = 95/5) to afford **3v** as a yellow solid (92.97 mg, 68%); mp 90-92 °C; IR (ATR, neat)  $\nu$  (cm<sup>-1</sup>): 1707 (s, C=O ester), 1672 (s, C=O ketone); <sup>1</sup>H-NMR (400 MHz, CDCl<sub>3</sub>)  $\delta$  8.19-8.15 (m, 1H), 8.11-8.06 (m, 3H), 7.76-7.71 (m, 2H), 7.33 (dd, *J* = 6.7, 1.7 Hz, 2H), 4.90 (td, *J* = 10.9, 4.4 Hz, 1H), 2.10-2.06 (m, 1H), 1.97-1.88 (m, 1H), 1.69-1.65 (m, 2H), 1.55-1.47 (m, 3H), 1.13-1.00 (m, 2H), 0.87 (dd, *J* = 6.8, 3.0 Hz, 7H), 0.75 (s, 1H), 0.73 (s, 1H); <sup>13</sup>C-NMR (100 MHz, CDCl<sub>3</sub>)  $\delta$  181.1, 177.7, 165.3, 149.0, 139.3, 138.2, 134.4, 134.1, 131.5, 131.4, 131.0, 129.3, 129.1, 127.5, 127.3, 113.6, , 75.1, 47.2, 40.9, 34.2, 31.4, 26.4, 23.5, 22.0, 20.7, 16.4; HRMS (ESI) [M+H]<sup>+</sup> Calcd for [C<sub>27</sub>H<sub>28</sub>BrO<sub>4</sub>]<sup>+</sup> 495.1171, found 495.1165.

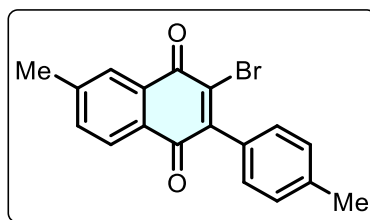

**3-Bromo-6-methyl-2-(*p*-tolyl)naphthalene-1,4-dione (3w)** The crude product was purified by column chromatography (hexane/EtOAc = 95/5) to afford **3w** as a yellow solid (84.75 mg, 90%); mp 92-94 °C; IR (ATR, neat)  $\nu$  (cm<sup>-1</sup>): 1658 (s, C=O); <sup>1</sup>H-NMR (400 MHz, CDCl<sub>3</sub>)  $\delta$  7.90 (t,  $J$  = 8.1 Hz, 2H), 7.46 (dd,  $J$  = 7.8, 0.9 Hz, 1H), 7.20 (d,  $J$  = 8.0 Hz, 2H), 7.16-7.13 (m, 2H), 2.42 (s, 3H), 2.33 (s, 3H); <sup>13</sup>C-NMR (100 MHz, CDCl<sub>3</sub>)  $\delta$  181.3, 178.4, 149.6, 145.2, 139.3, 138.4, 134.9, 131.1, 130.9, 129.2, 129.1, 129.0, 128.7, 127.7, 127.4, 21.8, 21.4; HRMS (ESI) [M+H]<sup>+</sup> Calcd for [C<sub>18</sub>H<sub>14</sub>BrO<sub>2</sub>]<sup>+</sup> 341.0177, found 341.0185.

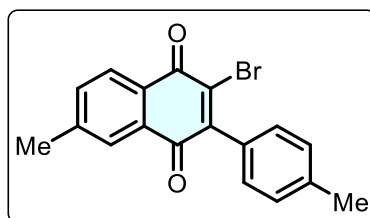

**3-Bromo-6-methyl-2-(*p*-tolyl)naphthalene-1,4-dione (3x)** The crude product was purified by column chromatography (hexane/EtOAc = 95/5) to afford **3x** as a orange solid (83.81 mg, 89%); mp 92-94°C; IR (ATR, neat)  $\nu$  (cm<sup>-1</sup>): 1656 (s, C=O); <sup>1</sup>H-NMR (400 MHz, CDCl<sub>3</sub>)  $\delta$  7.97 (d,  $J$  = 7.8 Hz, 1H), 7.80 (s, 1H), 7.44 (dd,  $J$  = 8.0, 1.0 Hz, 1H), 7.20 (d,  $J$  = 7.8 Hz, 2H), 7.15-7.12 (m, 2H), 2.40 (s, 3H), 2.33 (s, 3H); <sup>13</sup>C-NMR (100 MHz, CDCl<sub>3</sub>)  $\delta$  181.7, 177.8, 149.4, 145.5, 139.2, 138.8, 134.6, 131.3, 131.1, 129.1, 128.7, 128.7, 127.5, 127.5, 21.8, 21.4; HRMS (ESI) [M+H]<sup>+</sup> Calcd for [C<sub>18</sub>H<sub>14</sub>BrO<sub>2</sub>]<sup>+</sup> 341.0177, found 341.0196.

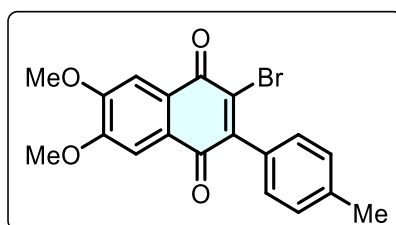

**2-Bromo-6,7-dimethoxy-3-(*p*-tolyl)naphthalene-1,4-dione (3y)** The crude product was purified by column chromatography (hexane/EtOAc = 90/10) to afford **3y** as a orange solid (99.39 mg, 93%); mp 104-106 °C; IR (ATR, neat)  $\nu$  (cm<sup>-1</sup>): 1656 (s, C=O); <sup>1</sup>H-NMR (400 MHz,



CDCl<sub>3</sub>)  $\delta$  7.49 (s, 1H), 7.41 (s, 1H), 7.22-7.19 (m, 2H), 7.15 (d,  $J$  = 8.2 Hz, 2H), 3.95 (s, 3H), 3.92 (s, 3H), 2.35 (s, 3H); <sup>13</sup>C-NMR (100 MHz, CDCl<sub>3</sub>)  $\delta$  181.0, 177.5, 153.7, 153.4, 149.1, 139.3, 138.0, 131.2, 129.2, 128.7, 126.2, 125.7, 108.7, 108.4, 56.5, 56.5, 21.4; HRMS (ESI) [M+H]<sup>+</sup> Calcd for [C<sub>19</sub>H<sub>16</sub>BrO<sub>4</sub>]<sup>+</sup> 387.0232, found 387.0235.

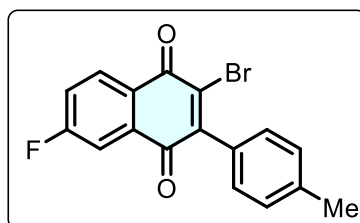

**2-Bromo-6-fluoro-3-(*p*-tolyl)naphthalene-1,4-dione (3z)** The crude product was purified by column chromatography (hexane/EtOAc = 95/5) to afford **3z** as a yellow solid (79.07 mg, 83%); mp 104-106 °C; IR (ATR, neat)  $\nu$  (cm<sup>-1</sup>): 1660 (s, C=O); <sup>1</sup>H-NMR (400 MHz, CDCl<sub>3</sub>)  $\delta$  8.15 (dd,  $J$  = 8.6, 5.2 Hz, 1H), 7.67 (dd,  $J$  = 8.5, 2.6 Hz, 1H), 7.35-7.31 (m, 1H), 7.21 (d,  $J$  = 8.0 Hz, 2H), 7.13 (dd,  $J$  = 6.4, 1.7 Hz, 2H), 2.34 (s, 3H); <sup>13</sup>C-NMR (100 MHz, CDCl<sub>3</sub>)  $\delta$  180.5, 176.9, 166.2 (d,  $J_{C-F}$  = 260.4 Hz, 1C), 149.8, 139.6, 139.0, 134.2, 134.1, 130.7 (d,  $J_{C-F}$  = 7.8 Hz, 1C), 129.1, 128.8, 127.6, 121.3, 121.1, 114.0 (d,  $J_{C-F}$  = 24.1 Hz, 1C), 21.4; <sup>19</sup>F NMR (376 MHz, CDCl<sub>3</sub>)  $\delta$  -100.46 (s); HRMS (ESI) [M+H]<sup>+</sup> Calcd for [C<sub>17</sub>H<sub>11</sub>BrFO<sub>2</sub>]<sup>+</sup> 344.9926, found 344.9924.

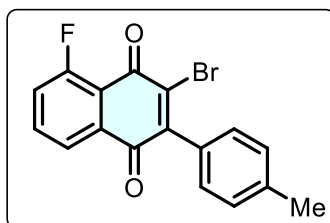

**3-Bromo-5-fluoro-2-(*p*-tolyl)naphthalene-1,4-dione (3aa)** The crude product was purified by column chromatography (hexane/EtOAc = 95/5) to afford **3aa** as a yellow solid (80.98 mg, 85%); mp 106-108 °C; IR (ATR, neat)  $\nu$  (cm<sup>-1</sup>): 1662 (s, C=O); <sup>1</sup>H-NMR (400 MHz, CDCl<sub>3</sub>)  $\delta$  7.90 (dd,  $J$  = 7.7, 1.0 Hz, 1H), 7.66 (td,  $J$  = 8.0, 4.6 Hz, 1H), 7.38 (ddd,  $J$  = 10.6, 8.4, 1.1 Hz, 1H), 7.21 (d,  $J$  = 8.0 Hz, 2H), 7.13 (dd,  $J$  = 6.3, 1.8 Hz, 2H), 2.34 (s, 3H); <sup>13</sup>C-NMR (100 MHz, CDCl<sub>3</sub>)  $\delta$  180.6, 175.6, 160.9 (d,  $J_{C-F}$  = 271.9 Hz, 1C), 148.8, 139.7, 135.8, 135.7 (d,  $J_{C-F}$  = 27.1 Hz, 1C), 133.2, 130.7, 129.0, 128.8, 123.7, 123.7, 122.9, 122.7, 118.7 (d,  $J_{C-F}$  = 4.8 Hz, 1C), 21.4; <sup>19</sup>F NMR (376 MHz, CDCl<sub>3</sub>)  $\delta$  -110.19 (s); HRMS (ESI) [M+H]<sup>+</sup> Calcd for [C<sub>17</sub>H<sub>11</sub>BrFO<sub>2</sub>]<sup>+</sup> 344.9926, found 344.9924.

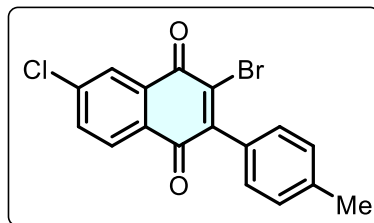

**3-Bromo-6-chloro-2-(*p*-tolyl)naphthalene-1,4-dione (3ab)** The crude product was purified by column chromatography (hexane/EtOAc = 95/5) to afford **3ab** as a yellow solid (77.85 mg, 78%); mp 108-110 °C; IR (ATR, neat)  $\nu$  (cm<sup>-1</sup>): 1660 (s, C=O); <sup>1</sup>H-NMR (400 MHz, CDCl<sub>3</sub>)  $\delta$  8.06 (d,  $J$  = 2.0 Hz, 1H), 7.99 (d,  $J$  = 8.3 Hz, 1H), 7.63 (dd,  $J$  = 8.3, 2.3 Hz, 1H), 7.21 (d,  $J$  = 8.0 Hz, 2H), 7.14 (d,  $J$  = 8.3 Hz, 2H), 2.34 (s, 3H); <sup>13</sup>C-NMR (100 MHz, CDCl<sub>3</sub>)  $\delta$  180.6, 177.3, 149.9, 141.0, 139.7, 138.3, 134.3, 132.1, 130.7, 129.7, 129.1, 129.0, 128.8, 127.3, 21.5; HRMS (ESI) [M+H]<sup>+</sup> Calcd for [C<sub>17</sub>H<sub>11</sub>BrClO<sub>2</sub>]<sup>+</sup> 360.9631, found 360.9635.

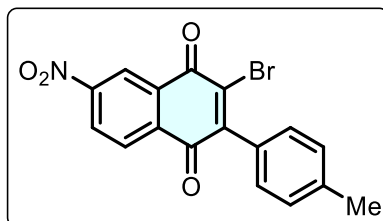

**3-Bromo-6-nitro-2-(*p*-tolyl)naphthalene-1,4-dione (3ac)** The crude product was purified by column chromatography (hexane/EtOAc = 90/10) to afford **3ac** as a yellow solid (61.63 mg, 60%); mp 116-118 °C; IR (ATR, neat)  $\nu$  (cm<sup>-1</sup>): 1664 (s, C=O); <sup>1</sup>H-NMR (400 MHz, CDCl<sub>3</sub>)  $\delta$  8.94 (d,  $J$  = 2.2 Hz, 1H), 8.52 (dd,  $J$  = 8.5, 2.3 Hz, 1H), 8.28 (d,  $J$  = 8.5 Hz, 1H), 7.25 (d,  $J$  = 7.8 Hz, 2H), 7.19-7.16 (m, 2H), 2.37 (s, 3H); <sup>13</sup>C-NMR (100 MHz, CDCl<sub>3</sub>)  $\delta$  180.1, 176.5, 151.0, 150.3, 140.1, 139.3, 135.0, 132.1, 130.3, 129.3, 129.1, 128.9, 128.3, 122.7, 21.5; HRMS (ESI) [M+H]<sup>+</sup> Calcd for [C<sub>17</sub>H<sub>11</sub>BrNO<sub>4</sub>]<sup>+</sup> 371.9871, found 371.9879.

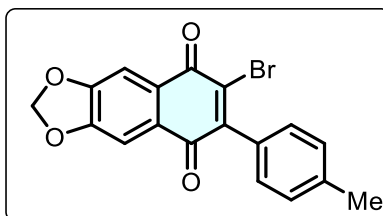

**6-Bromo-7-(*p*-tolyl)naphtho[2,3-*d*][1,3]dioxole-5,8-dione (3ad)** The crude product was purified by column chromatography (hexane/EtOAc = 90/10) to afford **3ad** as an orange solid (88.10 mg, 86%); mp 106-108 °C; IR (ATR, neat)  $\nu$  (cm<sup>-1</sup>): 1658 (s, C=O); <sup>1</sup>H-NMR (400

MHz, CDCl<sub>3</sub>)  $\delta$  7.47 (s, 1H), 7.39 (s, 1H), 7.21 (d,  $J$  = 8.0 Hz, 2H), 7.14 (dd,  $J$  = 6.4, 1.9 Hz, 2H), 6.08 (s, 2H), 2.35 (s, 3H); <sup>13</sup>C-NMR (100 MHz, CDCl<sub>3</sub>)  $\delta$  180.6, 177.1, 152.7, 152.4, 149.0, 139.4, 138.0, 131.0, 129.2, 128.7, 128.6, 128.0, 106.7, 106.5, 102.8, 21.5; HRMS (ESI) [M+H]<sup>+</sup> Calcd for [C<sub>18</sub>H<sub>12</sub>BrO<sub>4</sub>]<sup>+</sup> 370.9919, found 370.9918.

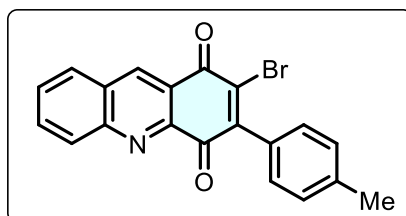

**2-Bromo-3-(p-tolyl)acridine-1,4-dione (3ae)** The crude product was purified by column chromatography (hexane/EtOAc = 85/15) to afford **3ae** as a yellow solid (67.85 mg, 65%); mp 148-150 °C; IR (ATR, neat)  $\nu$  (cm<sup>-1</sup>): 1668 (s, C=O); <sup>1</sup>H-NMR (400 MHz, CDCl<sub>3</sub>)  $\delta$  9.03 (s, 1H), 8.38 (d,  $J$  = 8.5 Hz, 1H), 8.04 (d,  $J$  = 8.2 Hz, 1H), 7.92-7.88 (m, 1H), 7.72 (t,  $J$  = 7.5 Hz, 1H), 7.27-7.22 (m, 3H), 7.19 (s, 1H), 2.38 (s, 3H); <sup>13</sup>C-NMR (100 MHz, CDCl<sub>3</sub>)  $\delta$  179.8, 177.7, 151.7, 150.0, 146.0, 139.9, 139.8, 138.0, 133.6, 131.6, 130.9, 130.2, 129.6, 129.3, 128.9, 128.7, 124.7, 21.6; HRMS (ESI) [M+H]<sup>+</sup> Calcd for [C<sub>20</sub>H<sub>13</sub>BrNO<sub>2</sub>]<sup>+</sup> 378.0130, found 378.0129.

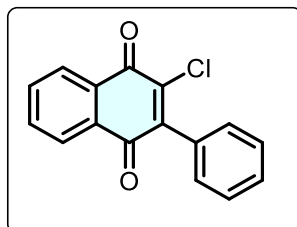

**2-Chloro-3-phenylnaphthalene-1,4-dione (5a).** The crude product was purified by column chromatography (hexane/EtOAc = 95/5) to afford **5a** as a yellow solid (74.99 mg, 75%); mp 94-96 °C; IR (ATR, neat)  $\nu$  (cm<sup>-1</sup>): 1668 (s, C=O); <sup>1</sup>H-NMR (400 MHz, CDCl<sub>3</sub>)  $\delta$  8.16-8.12 (m, 1H), 8.10-8.05 (m, 1H), 7.74-7.69 (m, 2H), 7.44-7.37 (m, 3H), 7.30-7.26 (m, 2H); <sup>13</sup>C-NMR (100 MHz, CDCl<sub>3</sub>)  $\delta$  182.1, 178.2, 145.9, 143.1, 134.4, 134.1, 131.8, 131.6, 131.3, 129.5, 129.4, 128.1, 127.3, 127.2; HRMS (ESI) [M+H]<sup>+</sup> Calcd for [C<sub>16</sub>H<sub>10</sub>ClO<sub>2</sub>]<sup>+</sup> 269.0369, found 269.0376.

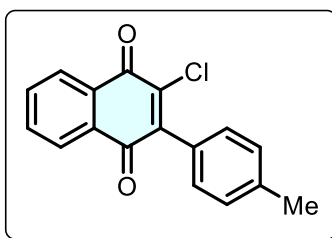

**2-Chloro-3-(*p*-tolyl)naphthalene-1,4-dione (5b).** The crude product was purified by column chromatography (hexane/EtOAc = 95/5) to afford **5b** as a yellow solid (80.52 mg, 78%); mp 94-96 °C; IR (ATR, neat)  $\nu$  (cm<sup>-1</sup>): 1660 (s, C=O); <sup>1</sup>H-NMR (400 MHz, CDCl<sub>3</sub>)  $\delta$  8.17-8.13 (m, 1H), 8.11-8.06 (m, 1H), 7.74-7.69 (m, 2H), 7.25-7.18 (m, 4H), 2.36 (s, 3H); <sup>13</sup>C-NMR (100 MHz, CDCl<sub>3</sub>)  $\delta$  182.2, 178.3, 146.0, 142.8, 139.7, 134.4, 134.0, 131.7, 131.4, 129.6, 128.8, 127.3, 127.2, 21.5; HRMS (ESI) [M+H]<sup>+</sup> Calcd for [C<sub>17</sub>H<sub>12</sub>ClO<sub>2</sub>]<sup>+</sup> 283.0526, found 283.0526.

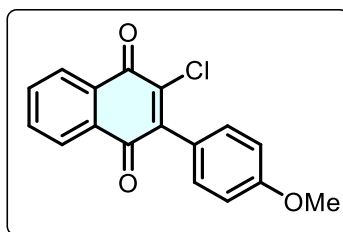

**2-Chloro-3-(4-methoxyphenyl)naphthalene-1,4-dione (5c).** The crude product was purified by column chromatography (hexane/EtOAc = 95/5) to afford **5c** as an orange solid (86.98 mg, 80%); mp 96-98 °C; IR (ATR, neat)  $\nu$  (cm<sup>-1</sup>): 1660 (s, C=O); <sup>1</sup>H-NMR (400 MHz, CDCl<sub>3</sub>)  $\delta$  8.18-8.13 (m, 1H), 8.11-8.07 (m, 1H), 7.74-7.70 (m, 2H), 7.30-7.26 (m, 2H), 6.98-6.92 (m, 2H), 3.81 (s, 3H); <sup>13</sup>C-NMR (100 MHz, CDCl<sub>3</sub>)  $\delta$  182.4, 178.4, 160.5, 145.5, 142.4, 134.3, 134.0, 131.8, 131.6, 131.4, 127.3, 127.1, 123.8, 113.5, 55.3; HRMS (ESI) [M+H]<sup>+</sup> Calcd for [C<sub>17</sub>H<sub>12</sub>ClO<sub>3</sub>]<sup>+</sup> 299.0475, found 299.0487.

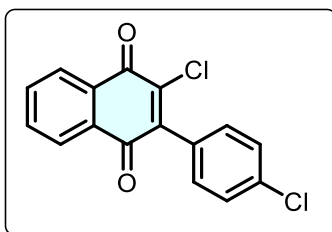

**2-Chloro-3-(4-chlorophenyl)naphthalene-1,4-dione (5d).** The crude product was purified by column chromatography (hexane/EtOAc = 95/5) to afford **5d** as a yellow solid (77.13 mg, 70%); mp 94-96 °C; IR (ATR, neat)  $\nu$  (cm<sup>-1</sup>): 1670 (s, C=O); <sup>1</sup>H-NMR (400 MHz, CDCl<sub>3</sub>)  $\delta$  8.16-8.12 (m, 1H), 8.09-8.05 (m, 1H), 7.75-7.69 (m, 2H), 7.41-7.38 (m, 2H), 7.25-7.21 (m,

2H);  $^{13}\text{C}$ -NMR (100 MHz,  $\text{CDCl}_3$ )  $\delta$  181.8, 177.9, 144.8, 143.3, 135.6, 134.5, 134.2, 131.5, 131.2, 131.1, 130.0, 128.4, 127.3, 127.3; HRMS (ESI)  $[\text{M}+\text{H}]^+$  Calcd for  $[\text{C}_{16}\text{H}_9\text{Cl}_2\text{O}_2]^+$  302.9980, found 302.9981.

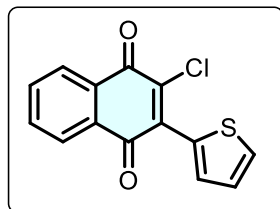

**2-chloro-3-(thiophen-2-yl)naphthalene-1,4-dione (5e).** The crude product was purified by column chromatography (hexane/EtOAc = 95/5) to afford **5e** as an orange solid (68.45 mg, 68%); mp 94-96 °C; IR (ATR, neat)  $\nu$  ( $\text{cm}^{-1}$ ): 1666 (s, C=O);  $^1\text{H}$ -NMR (400 MHz,  $\text{CDCl}_3$ )  $\delta$  8.15-8.11 (m, 1H), 8.10-8.08 (m, 1H), 7.74-7.69 (m, 2H), 7.68 (dd,  $J$  = 2.8, 1.2 Hz, 1H), 7.35 (dd,  $J$  = 5.0, 3.0 Hz, 1H), 7.28 (dd,  $J$  = 5.1, 1.1 Hz, 1H);  $^{13}\text{C}$ -NMR (100 MHz,  $\text{CDCl}_3$ ) 182.0, 178.2, 141.9, 140.7, 134.4, 134.1, 131.7, 131.2, 130.9, 130.1, 129.3, 127.3, 127.1, 124.5; HRMS (ESI)  $[\text{M}+\text{H}]^+$  Calcd for  $[\text{C}_{14}\text{H}_8\text{ClO}_2\text{S}]^+$  274.9934, found 274.9940.

### 3.1. Gram Scale Synthesis of 3b:

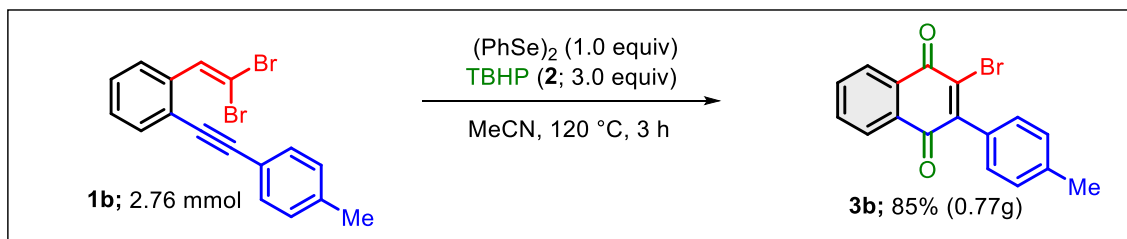

To an oven dried sealed tube, 1-(2,2-dibromovinyl)-2-(*p*-tolyl)benzene (**1b**, 2.76 mmol, 1.0 equiv), diphenyl selenide (2.76 mmol, 1.0 equiv) in MeCN was added. Then, 3.0 equiv (8.28 mmol; 0.01 M) of TBHP (**2**) was added to the reaction mixture. The reaction mixture was then stirred at 120 °C for 3 h in an oil bath. The reaction was monitored using thin layer chromatography. After completion of the reaction, the reaction mixture was allowed to cool. Then, organic layer was washed with aqueous saturated brine solution and finally extracted with EtOAc (3  $\times$  10 mL). The combined organic layers were dried over  $\text{Na}_2\text{SO}_4$ , concentrated under vacuum. The crude material obtained was purified by column chromatography on silica gel (100–200 mesh) (hexane: ethyl acetate; 98/02) to afford the corresponding product **3b** in 85% yield (0.77 g).

#### 4. General Procedure for the Synthesis of 2-(3-(Phenylselanyl)-2-(*p*-tolyl)-1*H*-inden-1-ylidene)malononitrile (7):

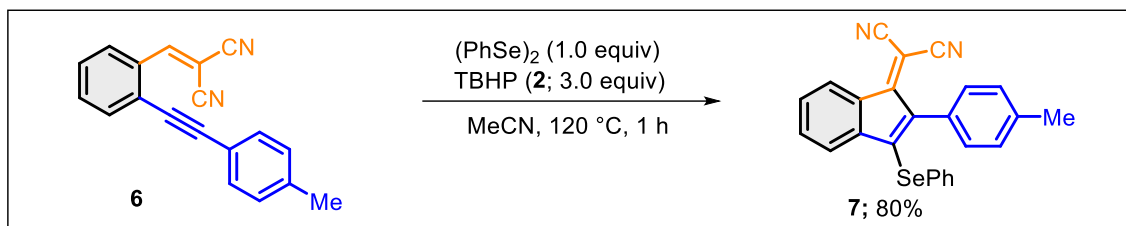

To an oven dried sealed tube, 2-(2-(*p*-tolylethynyl)benzylidene)malononitrile (**6**, 0.373 mmol, 1.0 equiv), diphenyl selenide (0.373 mmol, 1.0 equiv) in 2.0 ml MeCN was added. Then, 3.0 equiv (1.119 mmol; 0.01 M) of TBHP (**2**) was added to the reaction mixture. The reaction mixture was then stirred at 120 °C for 1 h in an oil bath. The reaction was monitored using thin layer chromatography. After completion of the reaction, the reaction mixture was allowed to cool. Then, organic layer was washed with aqueous saturated brine solution and finally extracted with EtOAc (3 × 10 mL). The combined organic layers were dried over Na<sub>2</sub>SO<sub>4</sub>, concentrated under vacuum. The crude material obtained was purified by column chromatography on silica gel (100–200 mesh) (hexane: ethyl acetate; 98/02) to afford the corresponding product **7**.

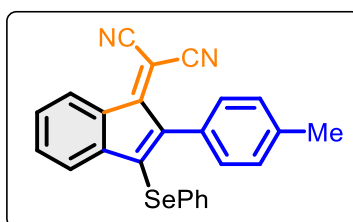

**2-(3-(Phenylselanyl)-2-(*p*-tolyl)-1*H*-inden-1-ylidene)malononitrile (**7**).** The crude product was purified by column chromatography (hexane/EtOAc = 98/2) to afford **7** as a deep red solid (126.23 mg, 80%); IR (ATR, neat)  $\nu$  (cm<sup>-1</sup>): 2223 (s, CN), 2213 (s, CN); <sup>1</sup>H-NMR (400 MHz, CDCl<sub>3</sub>)  $\delta$  8.16–8.12 (m, 1H), 7.38–7.36 (m, 2H), 7.28–7.23 (m, 1H), 7.20–7.10 (m, 6H), 7.08–7.05 (m, 2H), 6.63–6.59 (m, 1H), 2.34 (s, 3H); <sup>13</sup>C-NMR (100 MHz, CDCl<sub>3</sub>)  $\delta$  160.5, 150.3, 141.0, 138.6, 133.4, 131.8, 128.9, 128.5, 127.8, 127.7, 127.6, 125.4, 123.5, 122.1, 113.1, 110.5, 21.7; HRMS (ESI) [M+H]<sup>+</sup> Calcd for [C<sub>25</sub>H<sub>17</sub>N<sub>2</sub>Se]<sup>+</sup> 425.0557, found 425.0567.

#### 5. General Procedure for the Synthesis of 9a and 9b:

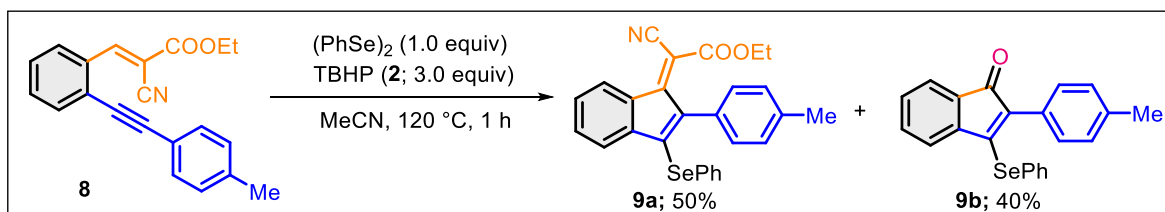

To an oven dried sealed tube, ethyl (*E*)-2-cyano-3-(2-(*p*-tolylethynyl)phenyl)acrylate (**8**, 0.317 mmol, 1.0 equiv), diphenyl selenide (0.317 mmol, 1.0 equiv) in 2.0 ml MeCN was added. Then, 3.0 equiv (0.951 mmol; 0.01M) of TBHP (**2**) was added to the reaction mixture. The reaction mixture was then stirred at 120 °C for 1 h in an oil bath. The reaction was monitored using thin layer chromatography. After completion of the reaction, the reaction mixture was allowed to cool. Then, organic layer was washed with aqueous saturated brine solution and finally extracted with EtOAc (3 × 10 mL). The combined organic layers were dried over Na<sub>2</sub>SO<sub>4</sub>, concentrated under vacuum. The crude material obtained was purified by column chromatography on silica gel (100–200 mesh) (hexane: ethyl acetate; 98/02) to afford the corresponding product **9a-b**.

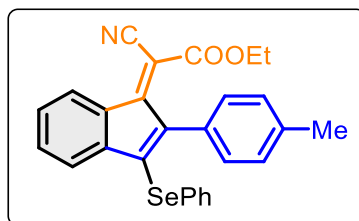

**Ethyl (*Z*)-2-cyano-2-(3-(phenylselanyl)-2-(*p*-tolyl)-1H-inden-1-ylidene)acetate (**9a**).** The crude product was purified by column chromatography (hexane/EtOAc = 98/2) to afford **9a** as a deep red solid (74.76 mg, 50%); IR (ATR, neat)  $\nu$  (cm<sup>-1</sup>): 2210 (s, CN), 1724 (s, C=O); <sup>1</sup>H-NMR (400 MHz, CDCl<sub>3</sub>)  $\delta$  8.23 (d, *J* = 7.6 Hz, 1H), 7.31-7.28 (m, 2H), 7.18-7.03 (m, 9H), 6.72 (d, *J* = 7.0 Hz, 1H), 3.42 (q, *J* = 7.2 Hz, 2H), 2.29 (s, 3H), 1.00 (t, *J* = 7.1 Hz, 3H); <sup>13</sup>C-NMR (100 MHz, CDCl<sub>3</sub>)  $\delta$  161.6, 153.6, 145.3, 142.2, 141.6, 138.0, 133.8, 132.9, 131.4, 131.3, 129.5, 129.3, 128.7, 128.1, 128.0, 127.8, 123.7, 122.8, 116.1, 100.0, 62.7, 21.3, 13.5; HRMS (ESI) [M+H]<sup>+</sup> Calcd for [C<sub>27</sub>H<sub>22</sub>NO<sub>2</sub>Se]<sup>+</sup> 472.0816, found 472.0803.

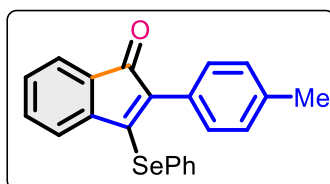

**3-(Phenylselanyl)-2-(*p*-tolyl)-1H-inden-1-one (**9b**).** The crude product was purified by column chromatography (hexane/EtOAc = 98/2) to afford **9b** as an orange liquid (23.93 mg, 40%); IR (ATR, neat)  $\nu$  (cm<sup>-1</sup>): 1670 (s, C=O); <sup>1</sup>H-NMR (400 MHz, CDCl<sub>3</sub>)  $\delta$  7.56-7.54 (m, 1H), 7.40-7.37 (m, 2H), 7.35-7.29 (m, 2H), 7.20-7.05 (m, 7H), 6.62-6.58 (m, 1H), 2.29 (s, 3H); <sup>13</sup>C-NMR (100 MHz, CDCl<sub>3</sub>)  $\delta$  193.2, 150.0, 144.4, 138.5, 138.4, 133.5, 133.3, 132.7, 130.7,

130.4, 129.7, 129.6, 129.3, 128.7, 128.6, 128.0, 127.5, 122.5, 121.9, 21.4; HRMS (ESI)  $[M+H]^+$  Calcd for  $[C_{22}H_{17}OSe]^+$  377.0445, found 377.0443.

## 6. General Procedure for Synthetic Applications of Product 3b.

### (6a) Suzuki Coupling Reaction:

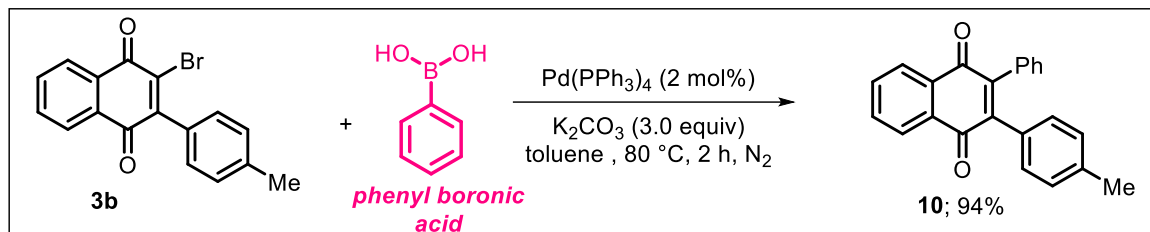

In an oven dried 25 mL round bottom flask, **3b** (0.266 mmol, 1.0 mmol) was taken, to this phenyl boronic acid (0.319 mmol, 1.2 equiv),  $Pd(PPh_3)_4$  (2 mol%, 0.02 equiv) and  $K_2CO_3$  (0.798 mmol, 3.0 equiv) was added in 2 mL of toluene. The reaction mixture was then purged with nitrogen and stirred at 80 °C for 2 h. Progress of reaction was monitored with TLC. After the consumption of starting material, the reaction mixture was washed with brine, extracted with ethyl acetate, and evaporated. The residue was purified by column chromatography (hexane/ethyl acetate) (95/5) to afford the corresponding coupled product **10**.

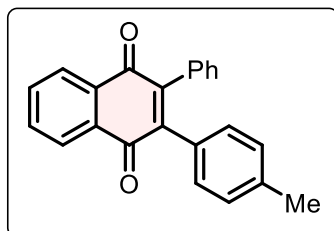

**2-Phenyl-3-(p-tolyl)naphthalene-1,4-dione (10)** The crude product was purified by column chromatography (hexane/EtOAc = 95/5) to afford **10** as a orange solid (81.12 mg, 94%); mp 134-136 °C; IR (ATR, neat)  $\nu$  ( $cm^{-1}$ ): 1654 (s, C=O);  $^1H$ -NMR (400 MHz,  $CDCl_3$ )  $\delta$  8.13-8.08 (m, 2H), 7.72-7.68 (m, 2H), 7.18-7.14 (m, 3H), 7.04-7.00 (m, 2H), 6.95 (d,  $J$  = 8.0 Hz, 2H), 6.89 (dd,  $J$  = 6.4, 1.9 Hz, 2H), 2.21 (s, 3H);  $^{13}C$ -NMR (100 MHz,  $CDCl_3$ )  $\delta$  184.9, 184.8, 145.7, 145.4, 138.2, 133.7, 133.4, 132.1, 132.1, 130.5, 130.1, 128.4, 128.1, 127.6, 126.6, 126.5, 21.3; HRMS (ESI)  $[M+H]^+$  Calcd for  $[C_{23}H_{17}O_2]^+$  325.1229, found 325.1235.

### (6b) Buchwald Coupling Reaction:



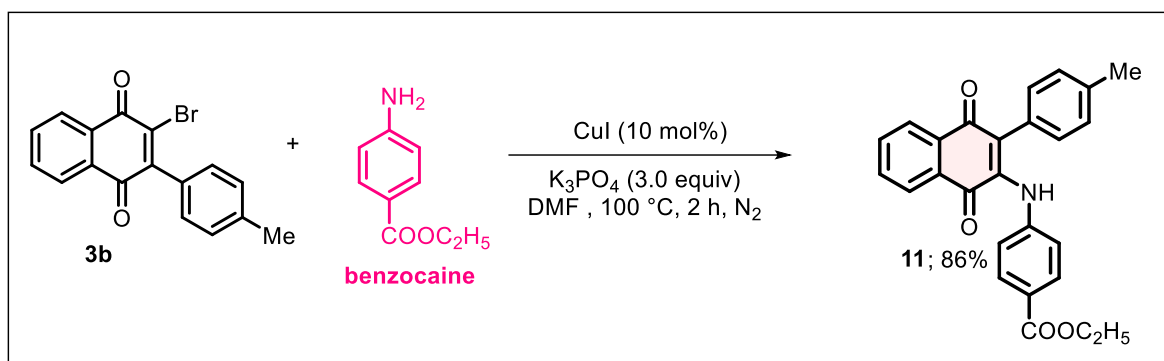

In an oven dried 25 mL round bottom flask, **3b** (0.266 mmol, 1.0 mmol) was taken, to this benzocaine (0.319 mmol, 1.2 equiv), CuI (10 mol%, 0.1 equiv) and K<sub>3</sub>PO<sub>4</sub> (0.798 mmol, 3.0 equiv) was added in 2 mL of DMF. The reaction mixture was then purged with nitrogen and stirred at 100 °C for 2 h. Progress of reaction was monitored with TLC. After the consumption of starting material, the reaction mixture was washed with brine, extracted with ethyl acetate, and evaporated. The residue was purified by column chromatography (hexane/ethyl acetate) (95/5) to afford the corresponding coupled product **11**.

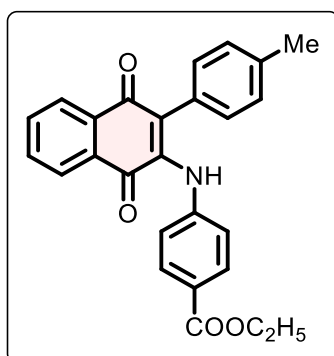

**Ethyl 4-((1,4-dioxo-3-(*p*-tolyl)-1,4-dihydronaphthalen-2-yl)amino)benzoate (11)** The product was obtained as a red solid (94.12 mg, 86%); mp 96-98 °C; IR (ATR, neat)  $\nu$  (cm<sup>-1</sup>): 3311 (s, N-H), 1704 (s, C=O ester), 1664 (s, C=O ketone); <sup>1</sup>H-NMR (400 MHz, DMSO-*d*<sub>6</sub>)  $\delta$  9.12 (s, 1H), 8.08 (dd, *J* = 19.0, 7.2 Hz, 2H), 7.87 (dt, *J* = 22.7, 7.1 Hz, 2H), 7.44 (d, *J* = 8.5 Hz, 2H), 6.97-6.79 (m, 6H), 4.22 (q, *J* = 7.1 Hz, 2H), 2.12 (s, 3H), 1.26 (t, *J* = 7.1 Hz, 3H); <sup>13</sup>C-NMR (100 MHz, DMSO-*d*<sub>6</sub>)  $\delta$  182.6, 182.1, 165.3, 143.6, 141.3, 136.4, 134.7, 133.1, 132.5, 130.5, 130.1, 128.6, 127.7, 126.0, 125.8, 122.7, 121.5, 120.5, 60.2, 20.7, 14.2; HRMS (ESI) [M+Na]<sup>+</sup> Calcd for [C<sub>26</sub>H<sub>21</sub>NNaO<sub>4</sub>]<sup>+</sup> 434.1368, found 434.1381.

#### (6c) Sonogashira Coupling Reaction:

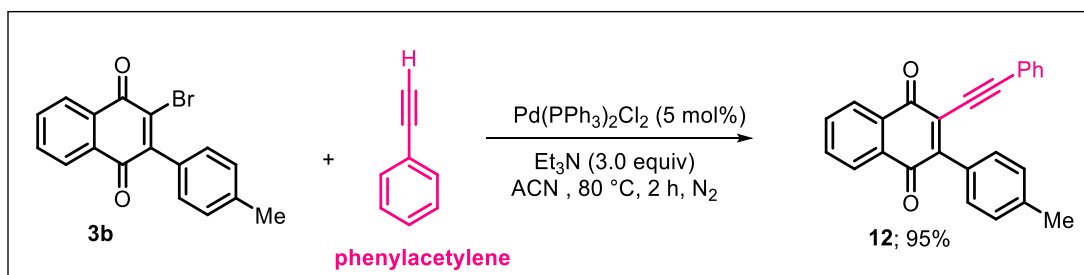

In an oven dried 25 mL round bottom flask, **3b** (0.266 mmol, 1.0 equiv) was taken, to this Pd(PPh<sub>3</sub>)<sub>2</sub>Cl<sub>2</sub> (5 mol%, 0.05 equiv) and phenylacetylene (0.319 mmol, 1.2 equiv) in 3.0 Ml MeCN was added. The reaction mixture was then purged with nitrogen and to this Et<sub>3</sub>N (0.798 mmol, 3.0 equiv) was added. The reaction mixture was then stirred at 60 °C for 2 h. Progress of reaction was monitored with TLC. After the consumption of starting material, the reaction mixture was quenched with brine, extracted with ethyl acetate, and evaporated. The residue was purified by column chromatography (hexane/ethyl acetate) (95/5) to afford the corresponding coupled product **12**.

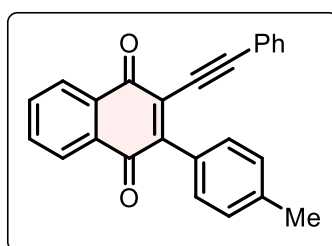

**2-(Phenylethynyl)-3-(p-tolyl)naphthalene-1,4-dione (12)** The product was obtained as a yellow liquid (88.04 mg, 95%); IR (ATR, neat)  $\nu$  (cm<sup>-1</sup>): 2213 (s, C $\equiv$ C), 1666 (s, C=O); <sup>1</sup>H-NMR (400 MHz, CDCl<sub>3</sub>)  $\delta$  8.09-8.02 (m, 2H), 7.67-7.62 (m, 2H), 7.43 (dd, *J* = 6.5, 1.7 Hz, 2H), 7.31-7.28 (m, 2H), 7.27-7.18 (m, 5H), 2.35 (s, 3H); <sup>13</sup>C-NMR (100 MHz, CDCl<sub>3</sub>)  $\delta$  183.5, 181.8, 148.2, 139.7, 134.0, 133.6, 132.2, 132.1, 131.7, 130.5, 129.9, 129.8, 129.5, 128.3, 126.8, 126.5, 122.1, 105.8, 84.5, 21.5; HRMS (ESI) [M+H]<sup>+</sup> Calcd for [C<sub>25</sub>H<sub>17</sub>O<sub>2</sub>]<sup>+</sup> 349.1229, found 349.1225.

#### (6d) Functional group interconversion:

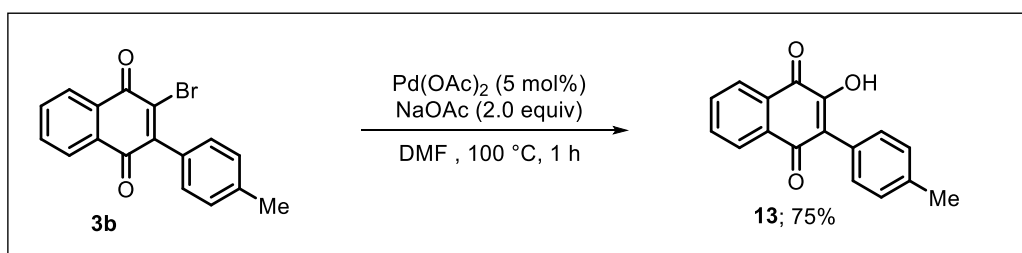

In an oven dried 25 mL round bottom flask, **3b** (0.266 mmol, 1.0 equiv) was taken, to this Pd(OAc)<sub>2</sub> (5 mol%, 0.05 equiv), NaOAc (0.532 mmol, 2.0 equiv) in 3.0 mL DMF was added. The reaction mixture was then stirred at 100 °C for 12 h. Progress of reaction was monitored with TLC. After the consumption of starting material, the reaction mixture was quenched with brine, extracted with ethyl acetate, and evaporated. The residue was purified by column chromatography (hexane/ethyl acetate) (90/10) to afford the corresponding coupled products **13**.

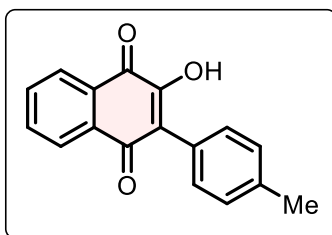

**2-hydroxy-3-(p-tolyl)naphthalene-1,4-dione (13)** The product was obtained as a yellow solid (52.72 mg, 75%); mp 146-148 °C; IR (ATR, neat)  $\nu$  (cm<sup>-1</sup>): 3350 (br, O-H), 1647 (s, C=O); <sup>1</sup>H-NMR (400 MHz, CDCl<sub>3</sub>)  $\delta$  8.13 (dd,  $J$  = 7.6, 0.9 Hz, 1H), 8.07 (dd,  $J$  = 7.5, 1.0 Hz, 1H), 7.73 (td,  $J$  = 7.5, 1.3 Hz, 1H), 7.66 (td,  $J$  = 7.5, 1.3 Hz, 1H), 7.51 (s, 1H), 7.35 (d,  $J$  = 8.0 Hz, 2H), 7.21 (d,  $J$  = 7.8 Hz, 2H), 2.33 (s, 3H); <sup>13</sup>C-NMR (100 MHz, CDCl<sub>3</sub>)  $\delta$  183.8, 181.8, 152.0, 138.7, 135.2, 133.1, 132.8, 130.5, 129.3, 128.7, 127.2, 126.9, 126.1, 122.2, 21.4; HRMS (ESI) [M+H]<sup>+</sup> Calcd for [C<sub>17</sub>H<sub>13</sub>O<sub>3</sub>]<sup>+</sup> 265.0865, found 265.0871.

## 7. References:

1. Claus, V.; Monilari, L.; Büllmann, S.; Thusek, J.; Rudolph, M.; Rominger, F.; Hashmi, S. K. Gold Catalyzed Cyclisation by 1,4-Dioxidation. *Chem. Eur. J.* **2019**, *25*, 9385 – 9389.
2. Ye, X.; Yang, X.; Wu, J. Rapid access to 1-methyleneindenes via palladium-catalyzed tandem reactions of 1-(2,2-dibromovinyl)-2-alkynylbenzenes with arylboronic acids. *Chem. Commun.* **2010**, *46*, 2950–2952.
3. Wurm, T.; Bucher, J.; Duckworth, S. B.; Rudolph, M.; Rominger, F.; Hashmi, A. S. K., On the Gold Catalyzed Generation of Vinyl Cations from 1,5-Diynes. *Angew. Chem.* **2017**, *56*, 3364-3368.
4. Rivera-Fuentes, P.; Rekowski, M. v. W.; Schweizer, W. B.; Gisselbrecht, J.-P.; Boudon, C.; Diederich, F., Cascade Carbopalladation Reaction between Alkynes and *gem*-Dibromoolefins: Facile Access to Monoannulated Pentalenes. *Org. Lett.* **2012**, *14*, 4066-4069.

5. London, G.; von Wantoch Rekowski, M.; Dumele, O.; Schweizer, W. B.; Gisselbrecht, J.-P.; Boudon, C.; Diederich, F., Pentalenes with Novel Topologies: Exploiting the Cascade Carbopalladation Reaction Between Alkynes and *gem*-Dibromoolefins. *Chem. Sci.* **2014**, *5*, 965-972.

**Copies of FT-IR,  $^1\text{H}$  NMR,  $^{13}\text{C}\{^1\text{H}\}$   
NMR and HRMS**

## IR Spectra

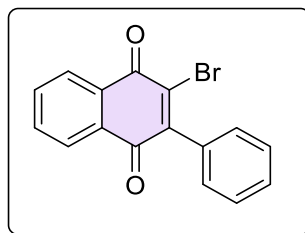

**2-bromo-3-phenylnaphthalene-1,4-dione (3a)**

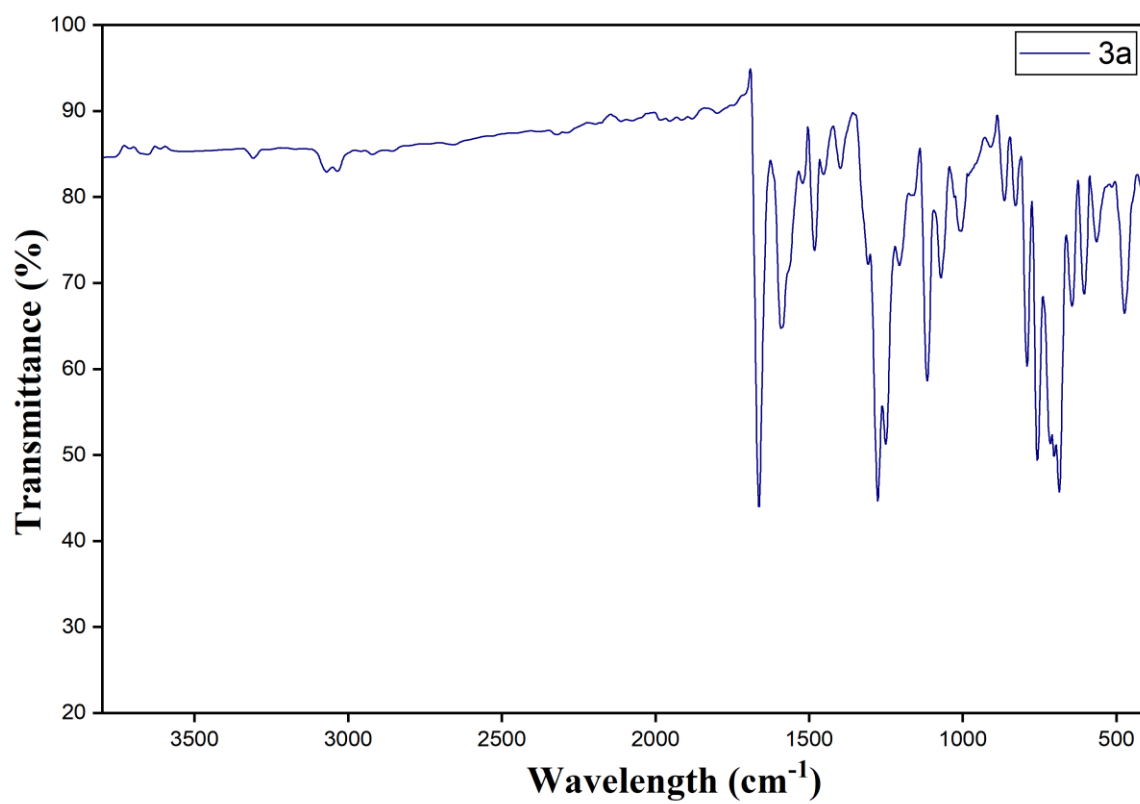

**<sup>1</sup>H NMR (400 MHz, CDCl<sub>3</sub>)**

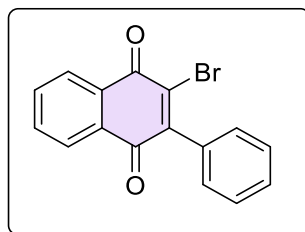

**2-bromo-3-phenylnaphthalene-1,4-dione (3a)**

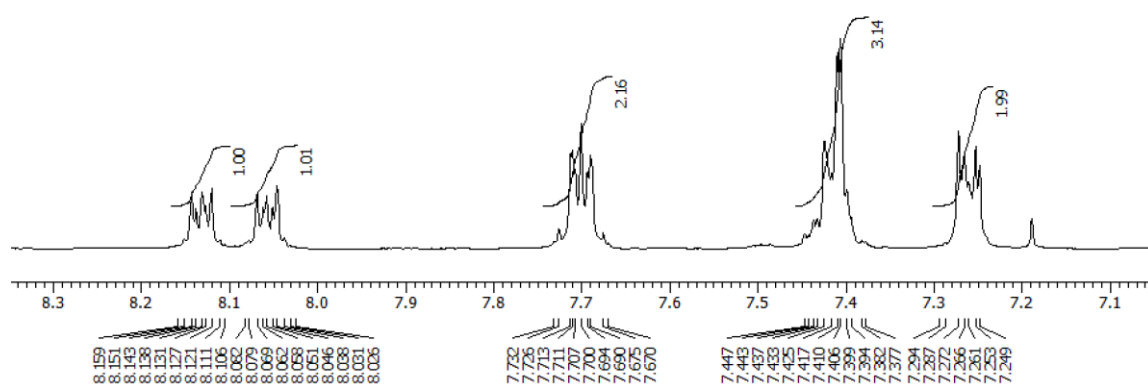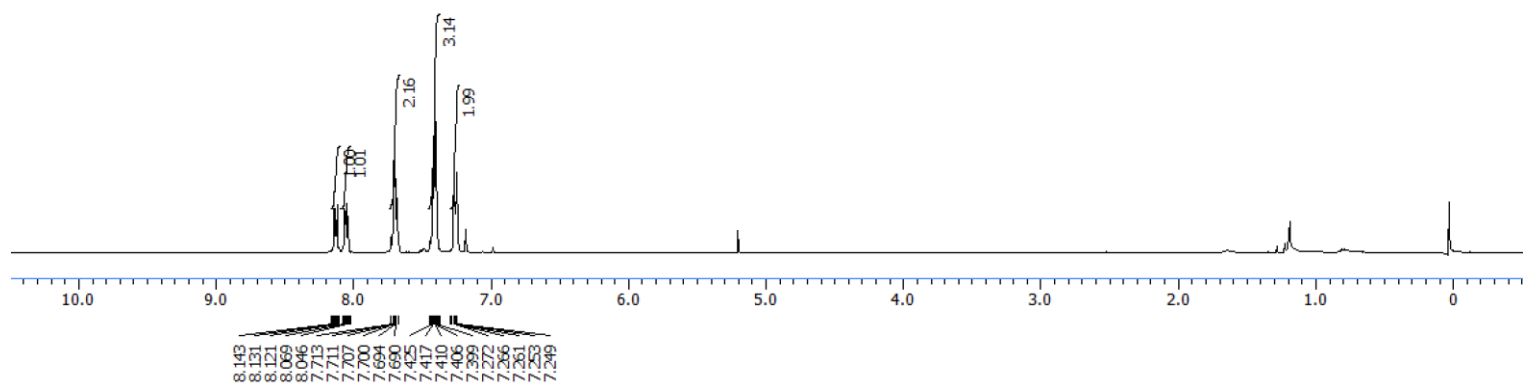

$^{13}\text{C}\{^1\text{H}\}$  NMR (100 MHz,  $\text{CDCl}_3$ )



**2-bromo-3-phenylnaphthalene-1,4-dione (3a)**

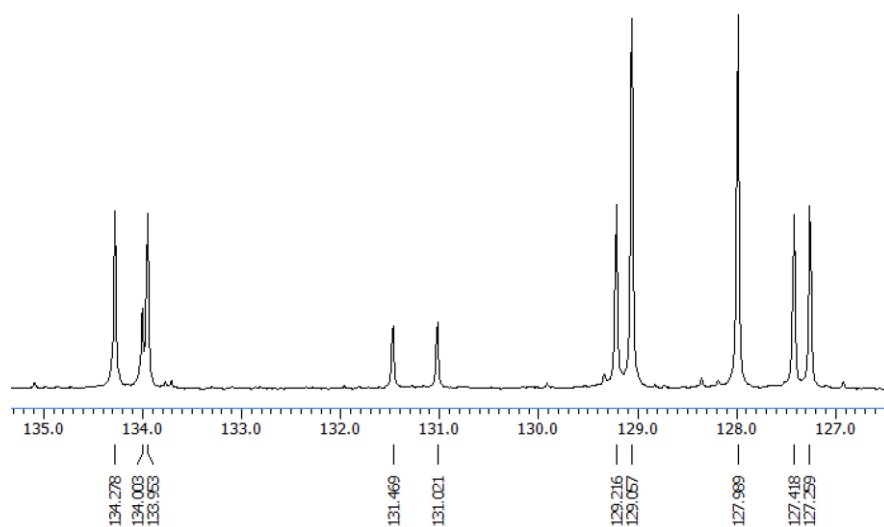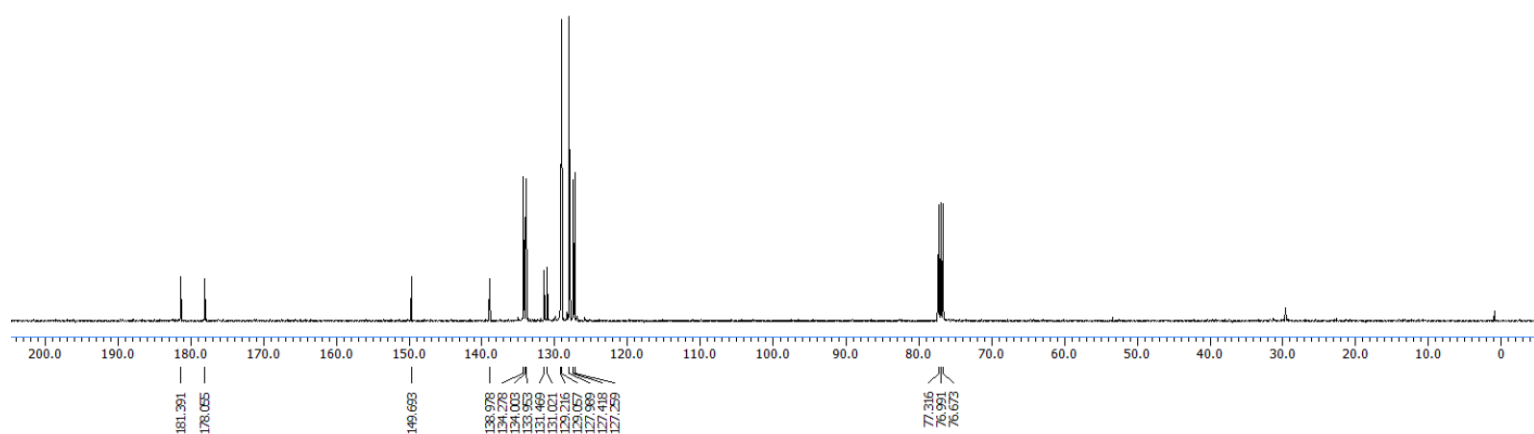



# HRMS

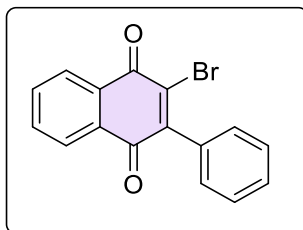

## 2-bromo-3-phenylnaphthalene-1,4-dione (3a)

### Qualitative Compound Report

Data File: MNS-316.d  
Sample Type: Sample  
Instrument Name: Instrument 1  
Acq Method: MS Scan.m  
IRM Calibration Status: Success  
Comment:

Sample Name: MNS-316  
Position: P1-A7  
User Name:  
Acquired Time: 04-03-2025 13:02:07  
DA Method: Default.m

Sample Group: Info. 3  
Acquisition SW: 6200 series TOF/6500 series  
Version: Q-TOF B.05.01 (B5125)

| Compound Label      | RT    | Mass     | Abund | Formula      | Tgt Mass | Diff (ppm) | MFG Formula  | DB Formula   |
|---------------------|-------|----------|-------|--------------|----------|------------|--------------|--------------|
| Cpd 1: C16 H9 Br O2 | 0.156 | 311.9789 | 22859 | C16 H9 Br O2 | 311.9786 | 1.01       | C16 H9 Br O2 | C16 H9 Br O2 |

| Compound Label      | m/z      | RT    | Algorithm       | Mass     |
|---------------------|----------|-------|-----------------|----------|
| Cpd 1: C16 H9 Br O2 | 312.9861 | 0.156 | Find By Formula | 311.9789 |

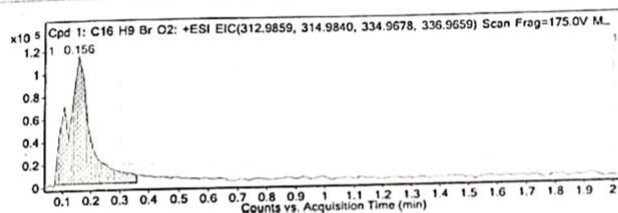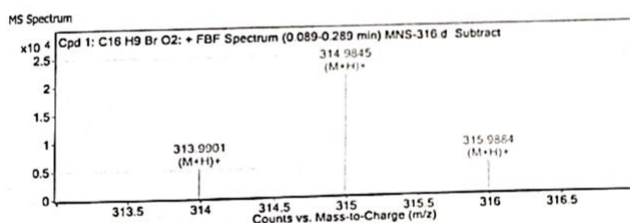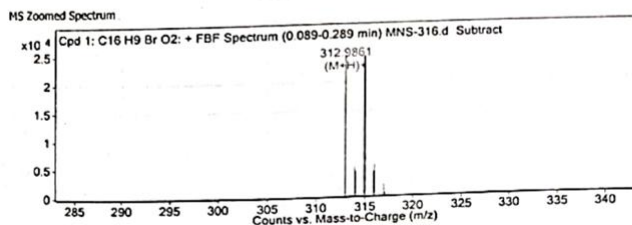

MS Spectrum Peak List

| m/z      | z | Abund    | Formula    | Ion    |
|----------|---|----------|------------|--------|
| 312.9861 | 1 | 22859.24 | C16H10BrO2 | (M+H)+ |
| 313.9901 | 1 | 5249     | C16H10BrO2 | (M+H)+ |
| 314.9845 | 1 | 22504.3  | C16H10BrO2 | (M+H)+ |
| 315.9884 | 1 | 5434.67  | C16H10BrO2 | (M+H)+ |
| 316.9849 | 1 | 1874.18  | C16H10BrO2 | (M+H)+ |

--- End Of Report ---

## IR Spectra

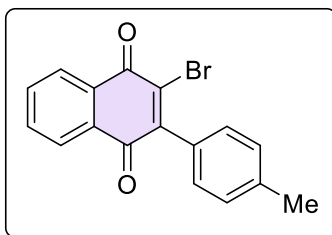

**2-bromo-3-(*p*-tolyl)naphthalene-1,4-dione (3b)**

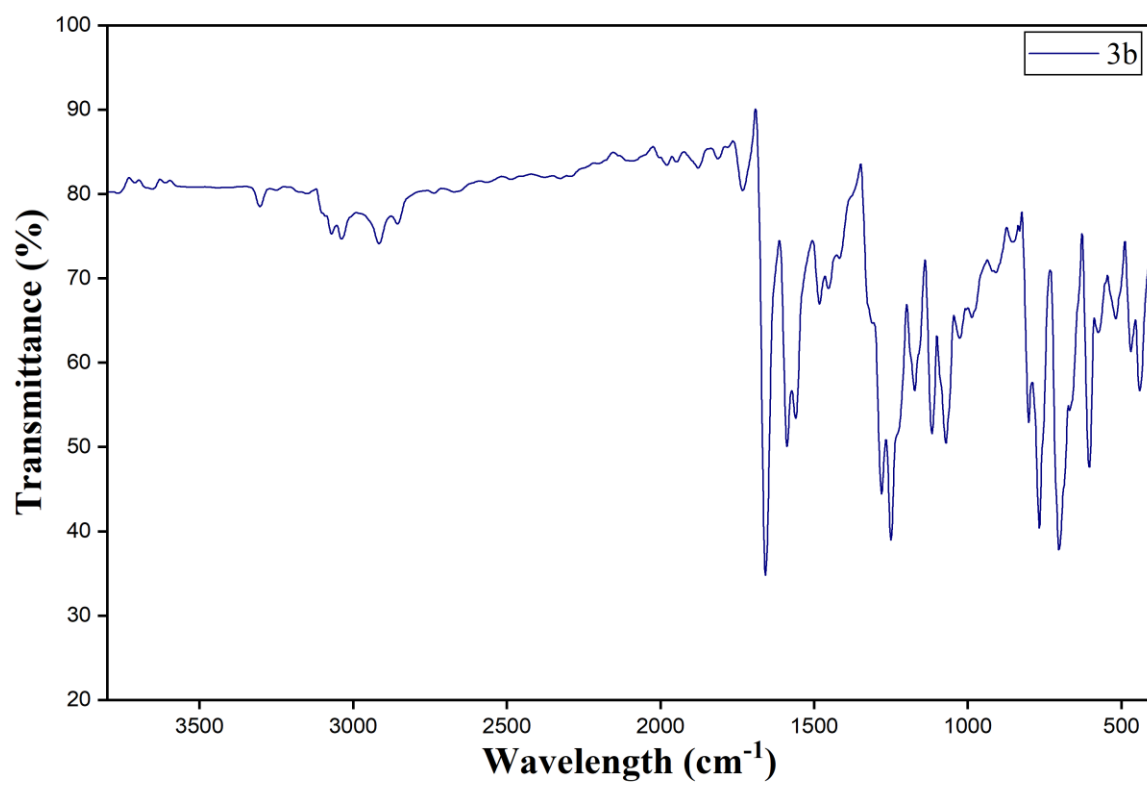

<sup>1</sup>H NMR (400 MHz, CDCl<sub>3</sub>)

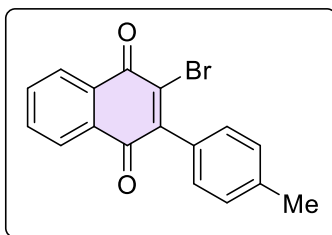

**2-bromo-3-(*p*-tolyl)naphthalene-1,4-dione (3b)**

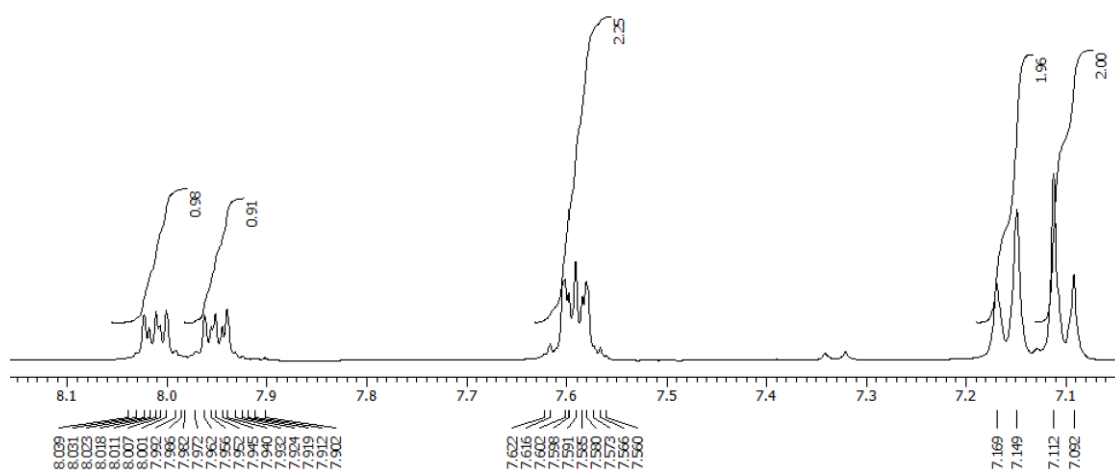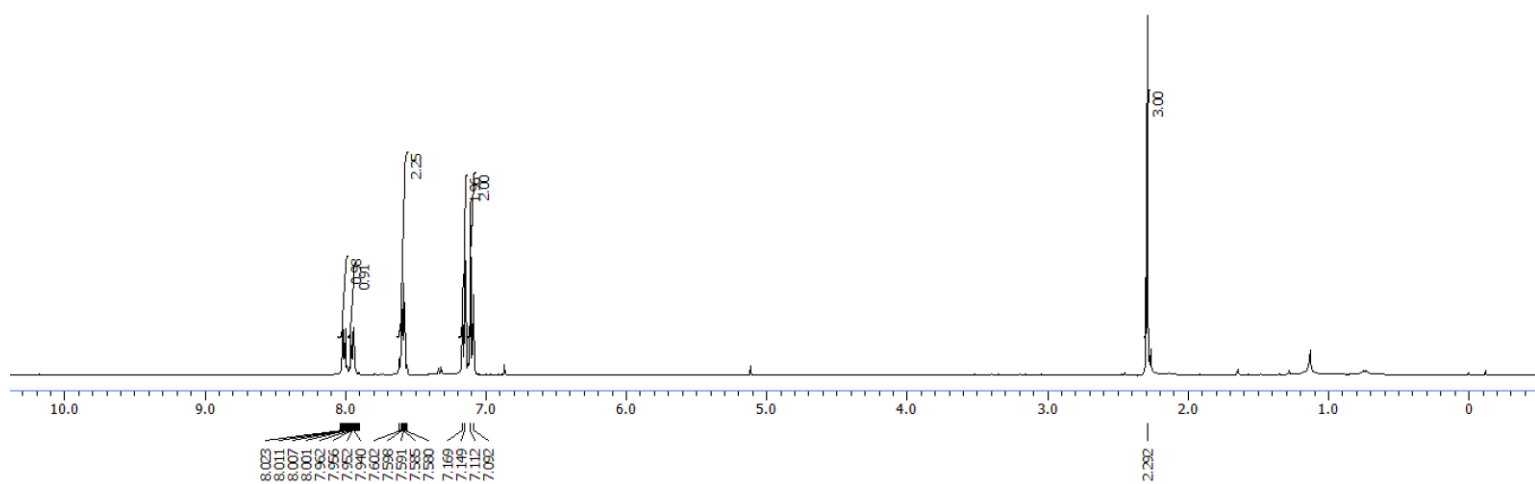

$^{13}\text{C}\{^1\text{H}\}$  NMR (100 MHz,  $\text{CDCl}_3$ )

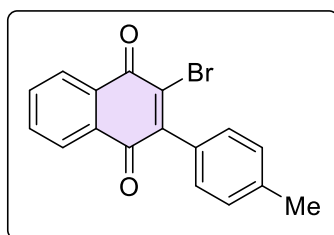

**2-bromo-3-(*p*-tolyl)naphthalene-1,4-dione (3b)**

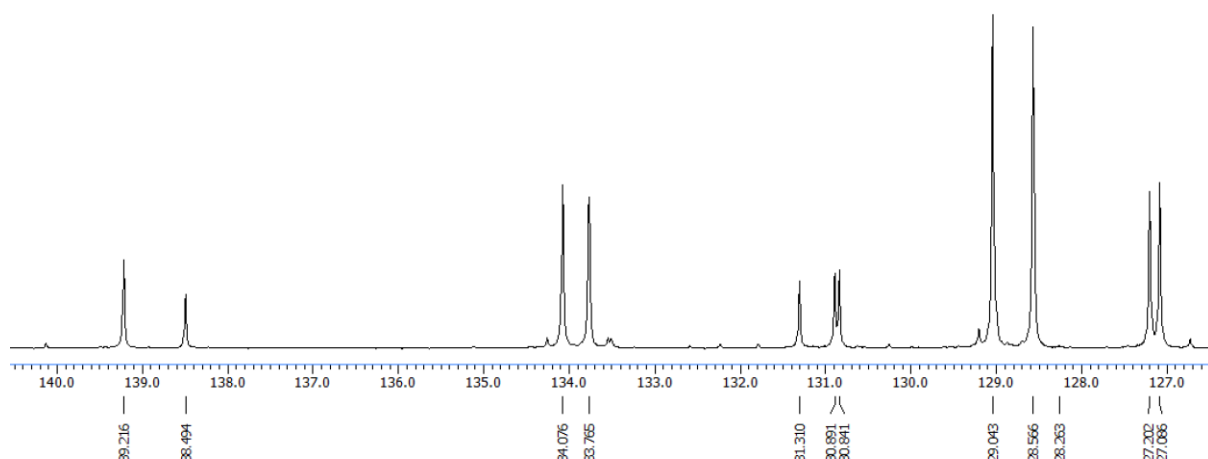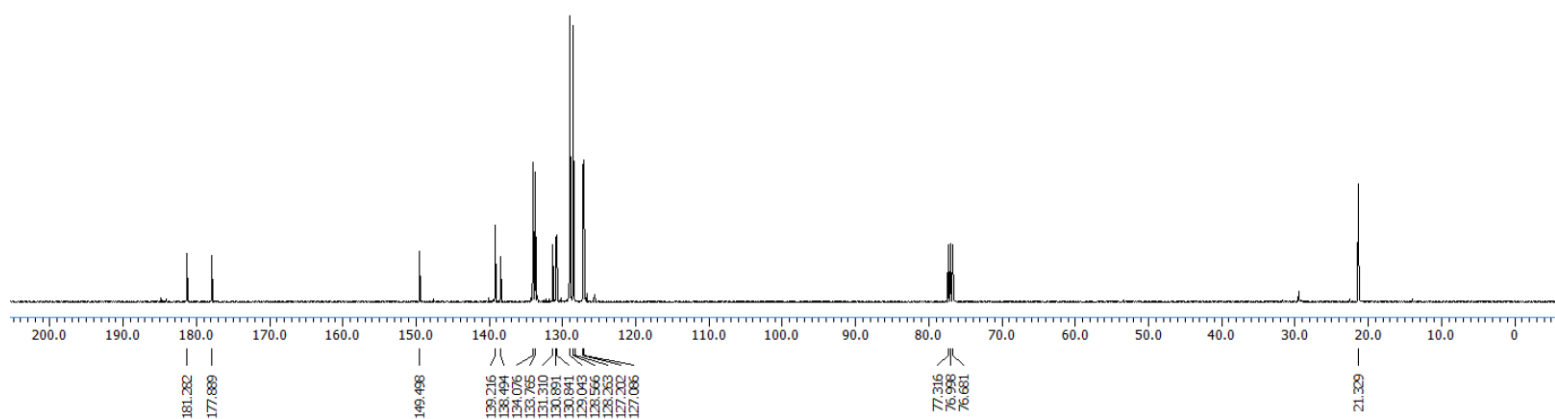

# HRMS

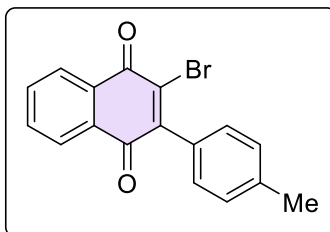

2-bromo-3-(*p*-tolyl)naphthalene-1,4-dione (3b)

## Qualitative Compound Report

Data File: MNS-311.d  
Sample Type: Sample  
Instrument Name: Instrument 1  
Acq Method: MS Scan.m  
IRM Calibration Status: Success  
Comment:

Sample Name: MNS-311  
Position: P1-B1  
User Name:  
Acquired Time: 11-06-2024 13:23:20  
DA Method: Default.m

Sample Group: Info. 3  
Acquisition SW: 6200 series TOF/6500 series  
Version: Q-TOF B.05.01 (B5125)

| Compound Label       | RT    | Mass     | Abund | Formula       | Tgt Mass | Diff (ppm) | MFG Formula   | DB Formula    |
|----------------------|-------|----------|-------|---------------|----------|------------|---------------|---------------|
| Cpd 1: C17 H11 Br O2 | 0.157 | 325.9963 | 20071 | C17 H11 Br O2 | 325.9942 | 6.27       | C17 H11 Br O2 | C17 H11 Br O2 |

| Compound Label       | m/z      | RT    | Algorithm       | Mass     |
|----------------------|----------|-------|-----------------|----------|
| Cpd 1: C17 H11 Br O2 | 327.0035 | 0.157 | Find By Formula | 325.9963 |

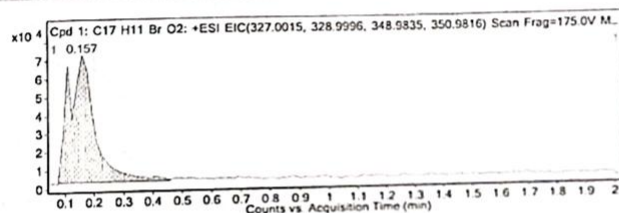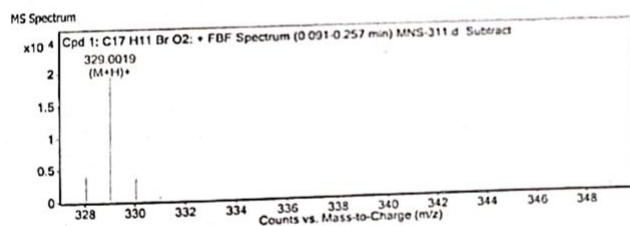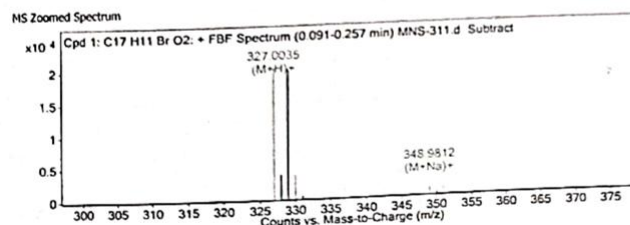

| m/z      | z | Abund    | Formula      | Ion     |
|----------|---|----------|--------------|---------|
| 327.0035 | 1 | 20070.81 | C17H12BrO2   | (M+H)+  |
| 328.0067 | 1 | 3805.27  | C17H12BrO2   | (M+H)+  |
| 329.0019 | 1 | 19387.96 | C17H12BrO2   | (M+H)+  |
| 330.0055 | 1 | 3731.68  | C17H12BrO2   | (M+H)+  |
| 331.0089 | 1 | 899.03   | C17H12BrO2   | (M+H)+  |
| 332.0095 | 1 | 66.73    | C17H12BrO2   | (M+H)+  |
| 348.9812 | 1 | 514.41   | C17H11BrNaO2 | (M+Na)+ |
| 349.9818 | 1 | 284.85   | C17H11BrNaO2 | (M+Na)+ |

--- End Of Report ---

## IR Spectra

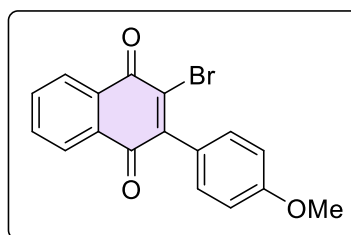

**2-bromo-3-(4-methoxyphenyl)naphthalene-1,4-dione (3c)**

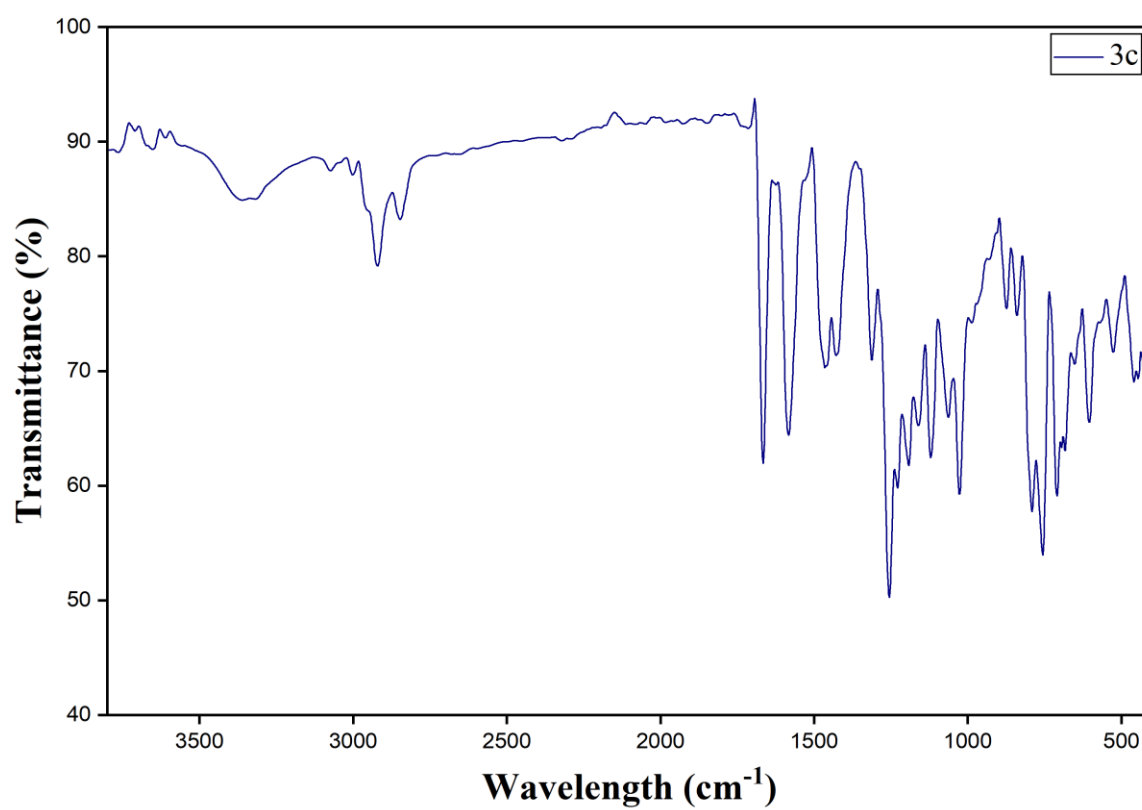

<sup>1</sup>H NMR (400 MHz, CDCl<sub>3</sub>)

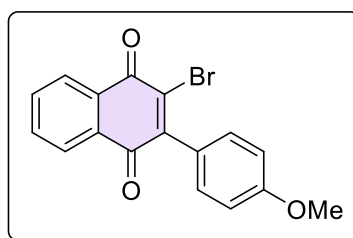

**2-bromo-3-(4-methoxyphenyl)naphthalene-1,4-dione (3c)**

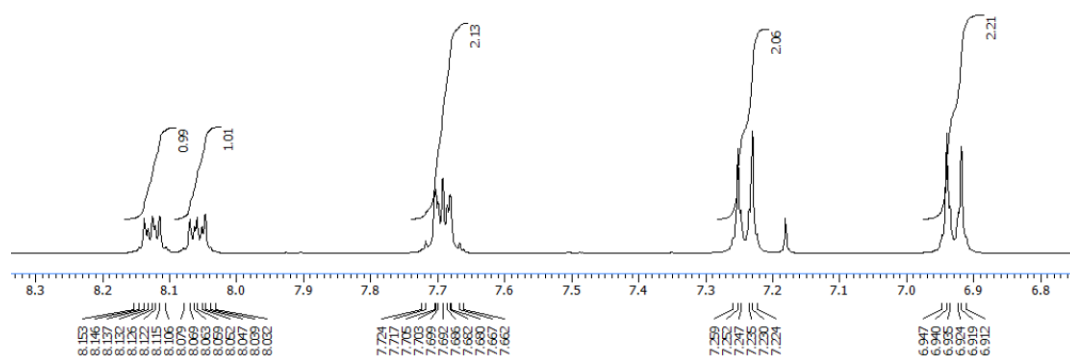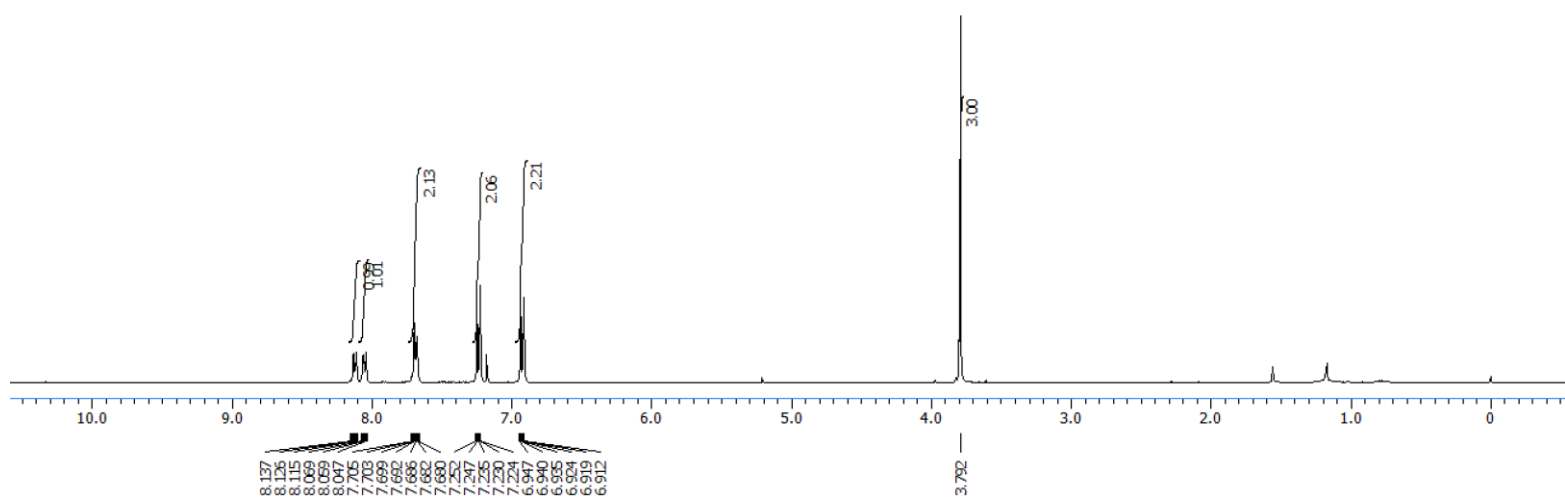

$^{13}\text{C}\{^1\text{H}\}$  NMR (100 MHz,  $\text{CDCl}_3$ )

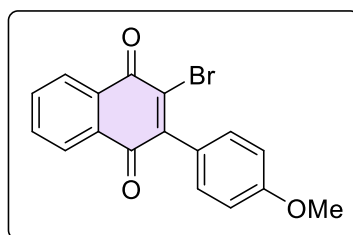

**2-bromo-3-(4-methoxyphenyl)naphthalene-1,4-dione (3c)**

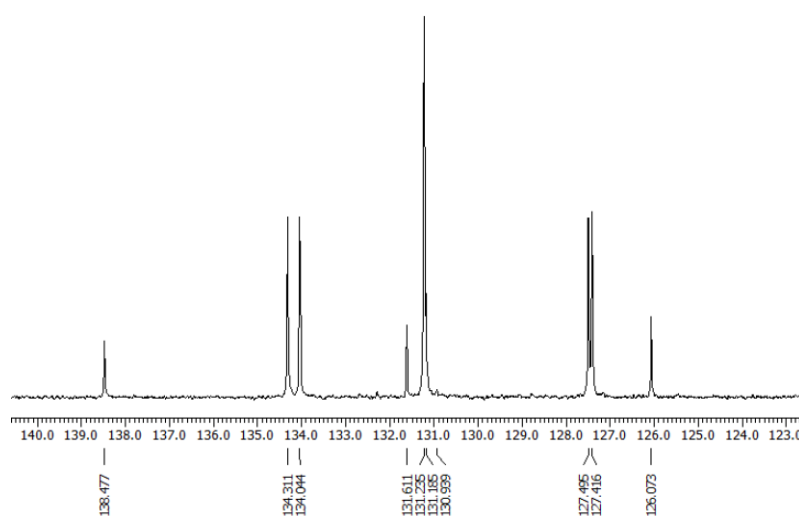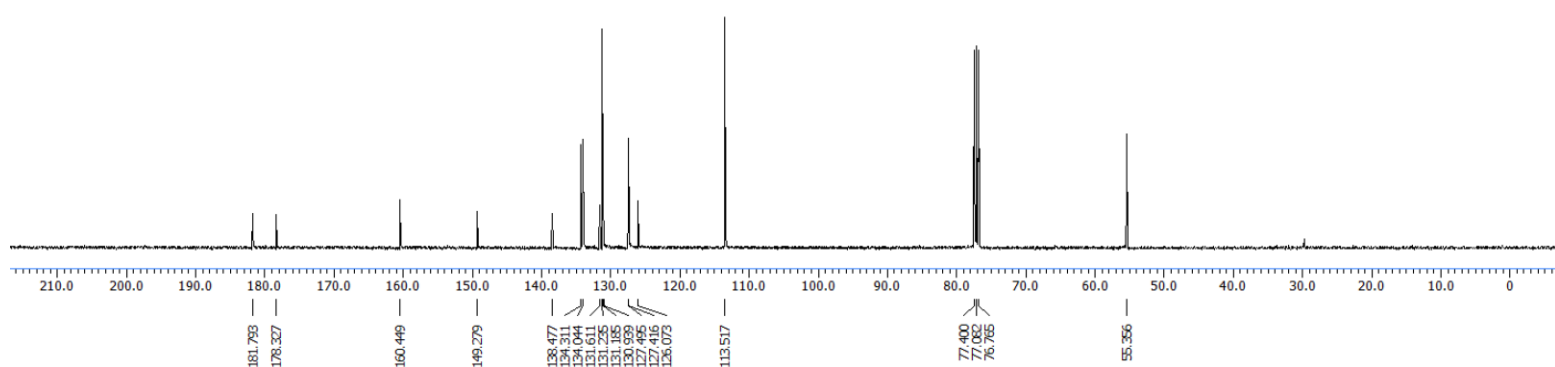



# HRMS

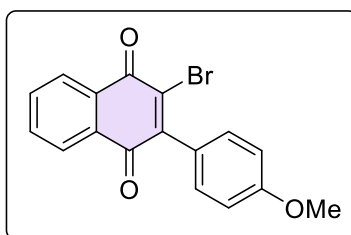

## 2-bromo-3-(4-methoxyphenyl)naphthalene-1,4-dione (3c)

### Qualitative Compound Report

Data File: MNS-300.d  
Sample Type: Sample  
Instrument Name: Instrument 1  
Acq Method: MS Scan.m  
IRM Calibration Status: Success  
Comment:

Sample Name: MNS-300  
Position: P1-A3  
User Name:  
Acquired Time: 13-05-2024 14:16:22  
DA Method: Default.m

Sample Group: Info. 3  
Acquisition SW: 6200 series TOF/6500 series  
Version: Q-TOF B.05.01 (85125)

| Compound Label       | RT    | Mass    | Abund  | Formula       | Tgt Mass | Diff (ppm) | MFG Formula   | DB Formula    |
|----------------------|-------|---------|--------|---------------|----------|------------|---------------|---------------|
| Cpd 1: C17 H11 Br O3 | 0.158 | 341.991 | 106321 | C17 H11 Br O3 | 341.9992 | 5.44       | C17 H11 Br O3 | C17 H11 Br O3 |

| Compound Label       | m/z      | RT    | Algorithm       | Mass    |
|----------------------|----------|-------|-----------------|---------|
| Cpd 1: C17 H11 Br O3 | 342.9982 | 0.158 | Find By Formula | 341.991 |

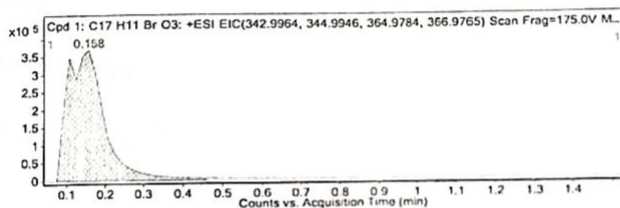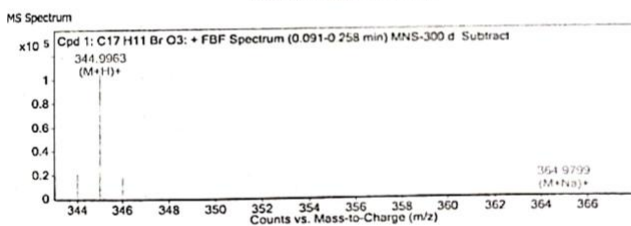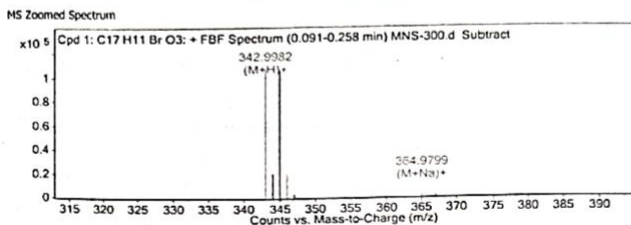

| m/z      | z | Abund     | Formula      | Ion     |
|----------|---|-----------|--------------|---------|
| 342.9982 | 1 | 106321.27 | C17H12BrO3   | (M+H)+  |
| 344.0027 | 1 | 21468.66  | C17H12BrO3   | (M+H)+  |
| 344.9963 | 1 | 105363.95 | C17H12BrO3   | (M+H)+  |
| 345.9996 | 1 | 18958.19  | C17H12BrO3   | (M+H)+  |
| 347.003  | 1 | 2561.77   | C17H12BrO3   | (M+H)+  |
| 348.0029 | 1 | 187.86    | C17H12BrO3   | (M+H)+  |
| 364.9799 | 1 | 1568.85   | C17H11BrNaO3 | (M+Na)+ |
| 365.9823 | 1 | 326.81    | C17H11BrNaO3 | (M+Na)+ |
| 366.978  | 1 | 1550.11   | C17H11BrNaO3 | (M+Na)+ |
| 367.9867 | 1 | 314.61    | C17H11BrNaO3 | (M+Na)+ |

## IR Spectra

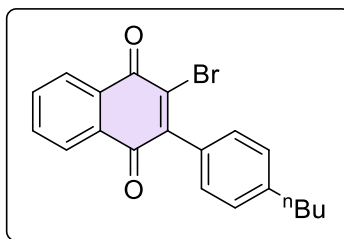

**2-bromo-3-(4-butylphenyl)naphthalene-1,4-dione (3d)**

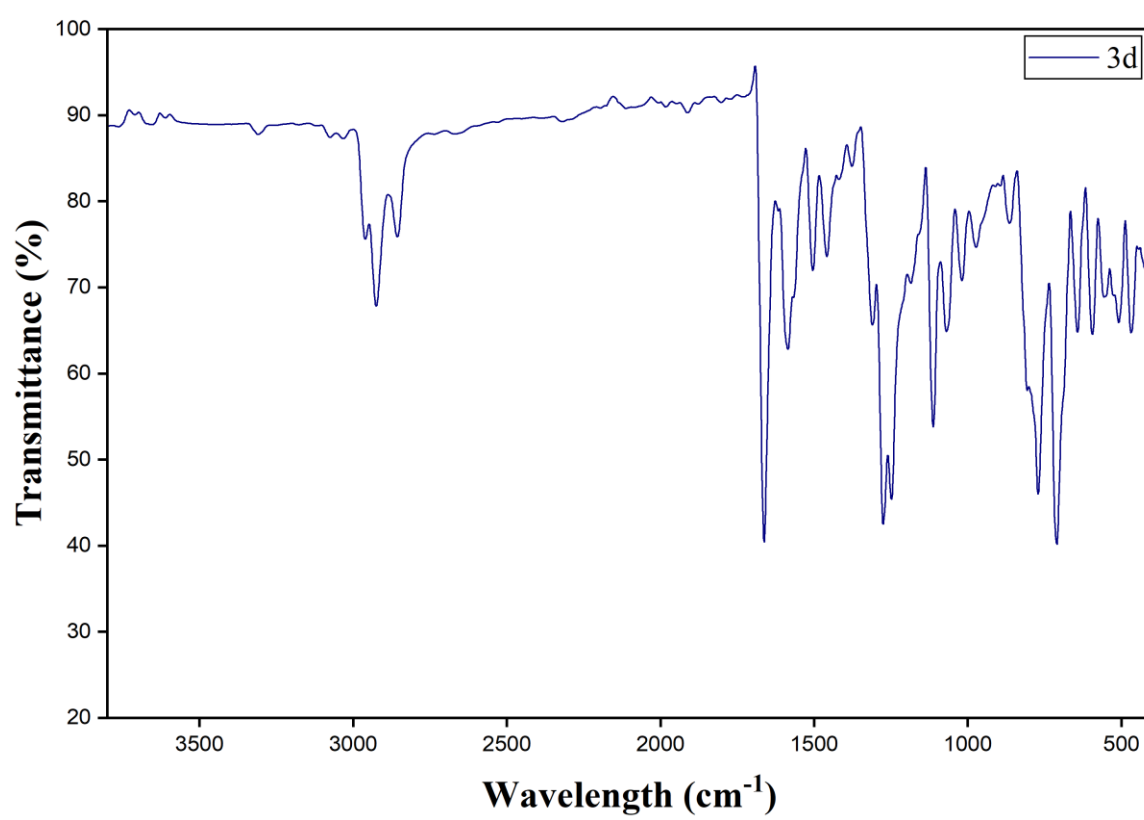

$^1\text{H}$  NMR (400 MHz,  $\text{CDCl}_3$ )

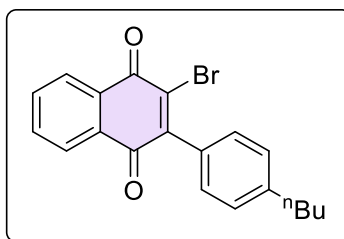

**2-bromo-3-(4-butylphenyl)naphthalene-1,4-dione (3d)**

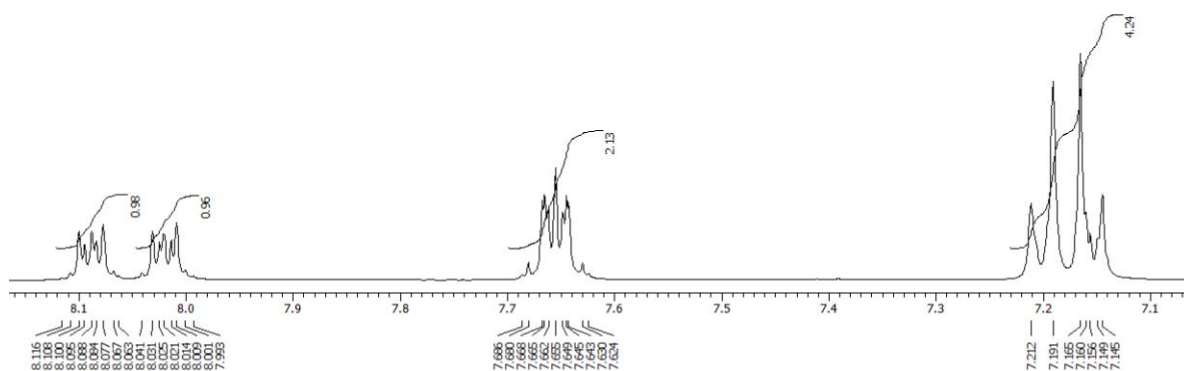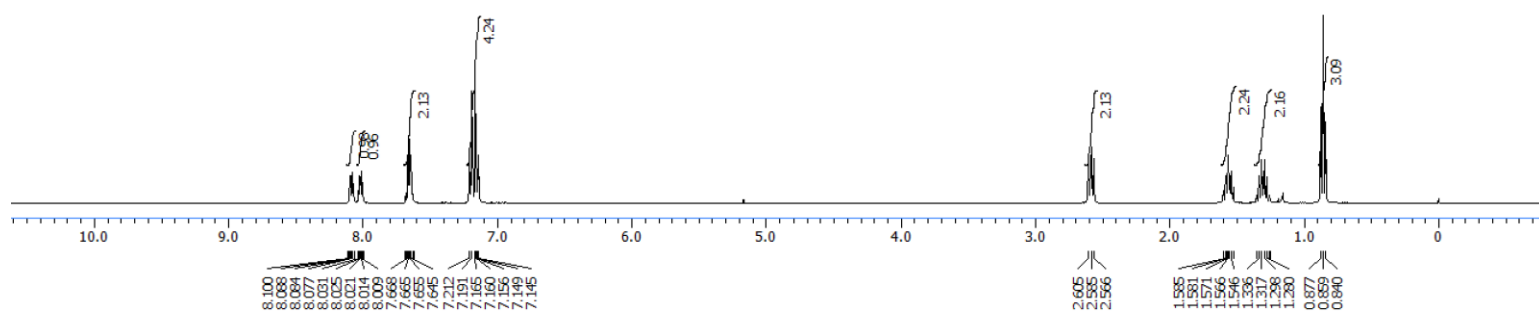

$^{13}\text{C}\{^1\text{H}\}$  NMR (100 MHz,  $\text{CDCl}_3$ )

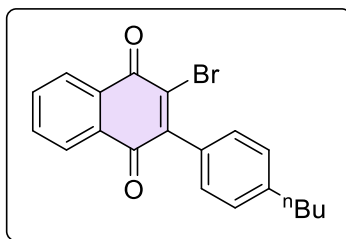

**2-bromo-3-(4-butylphenyl)naphthalene-1,4-dione (3d)**

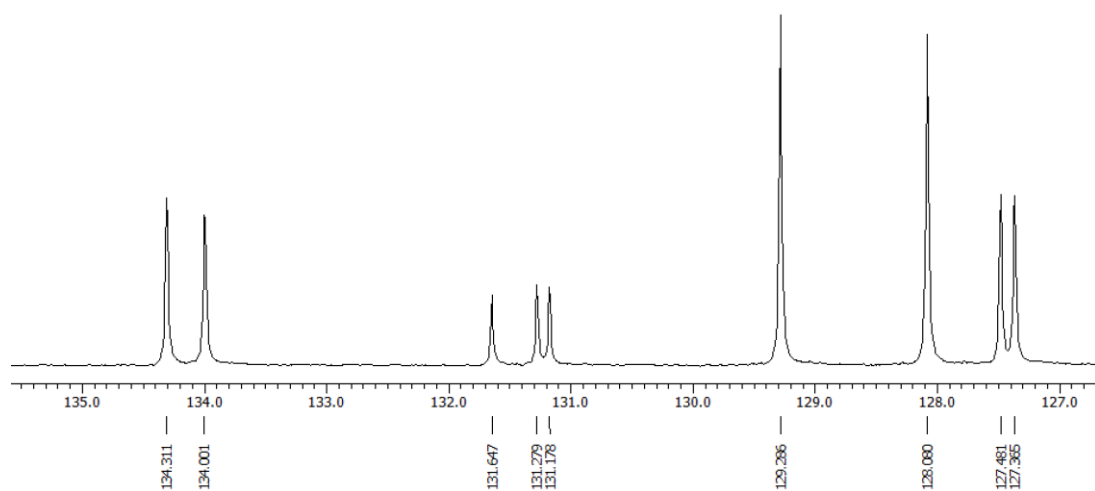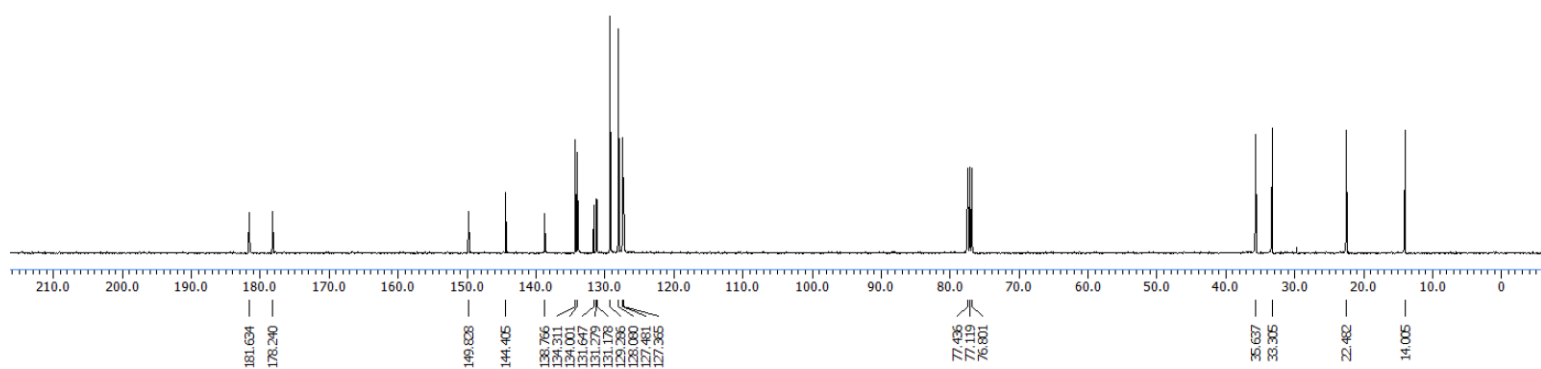

# HRMS

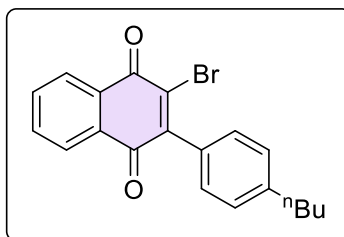

**2-bromo-3-(4-butylphenyl)naphthalene-1,4-dione (3d)**

## Qualitative Compound Report

Data File: MNS-317.d  
Sample Type: Sample  
Instrument Name: Instrument 1  
Acq Method: MS Scan.m  
IRM Calibration Status: Success  
Comment:  
Sample Group: Info. 3  
Acquisition SW: 6200 series TOF/6500 series  
Version: Q-TOF B.05.01 (B5125)

Sample Name: MNS-317  
Position: P1-A8  
User Name:  
Acquired Time: 04-03-2025 13:02:59  
DA Method: Default.m

| Compound Label       | RT    | Mass    | Abund  | Formula       | Tgt Mass | Diff (ppm) | MFG Formula   | DB Formula    |
|----------------------|-------|---------|--------|---------------|----------|------------|---------------|---------------|
| Cpd 1: C20 H17 Br O2 | 0.153 | 368.042 | 112600 | C20 H17 Br O2 | 368.0412 | 2.06       | C20 H17 Br O2 | C20 H17 Br O2 |

| Compound Label       | m/z      | RT    | Algorithm       | Mass    |
|----------------------|----------|-------|-----------------|---------|
| Cpd 1: C20 H17 Br O2 | 369.0492 | 0.153 | Find By Formula | 368.042 |

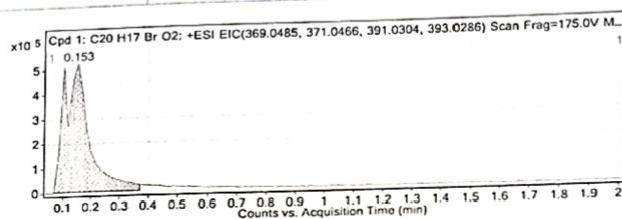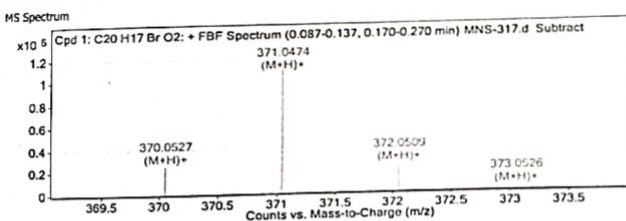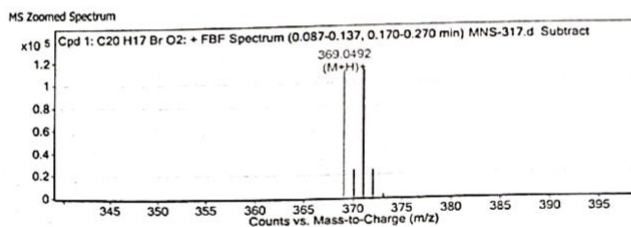

MS Spectrum Peak List

| m/z      | z | Abund     | Formula    | Ion    |
|----------|---|-----------|------------|--------|
| 369.0492 | 1 | 112600.45 | C20H18BrO2 | (M+H)+ |
| 370.0527 | 1 | 24693.54  | C20H18BrO2 | (M+H)+ |
| 371.0474 | 1 | 111579.8  | C20H18BrO2 | (M+H)+ |
| 372.0509 | 1 | 23795.92  | C20H18BrO2 | (M+H)+ |
| 373.0526 | 1 | 3040.17   | C20H18BrO2 | (M+H)+ |
| 374.0448 | 1 | 326.97    | C20H18BrO2 | (M+H)+ |

## IR Spectra

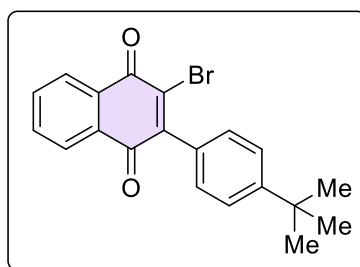

**2-bromo-3-(4-(*tert*-butyl)phenyl)naphthalene-1,4-dione (3e)**

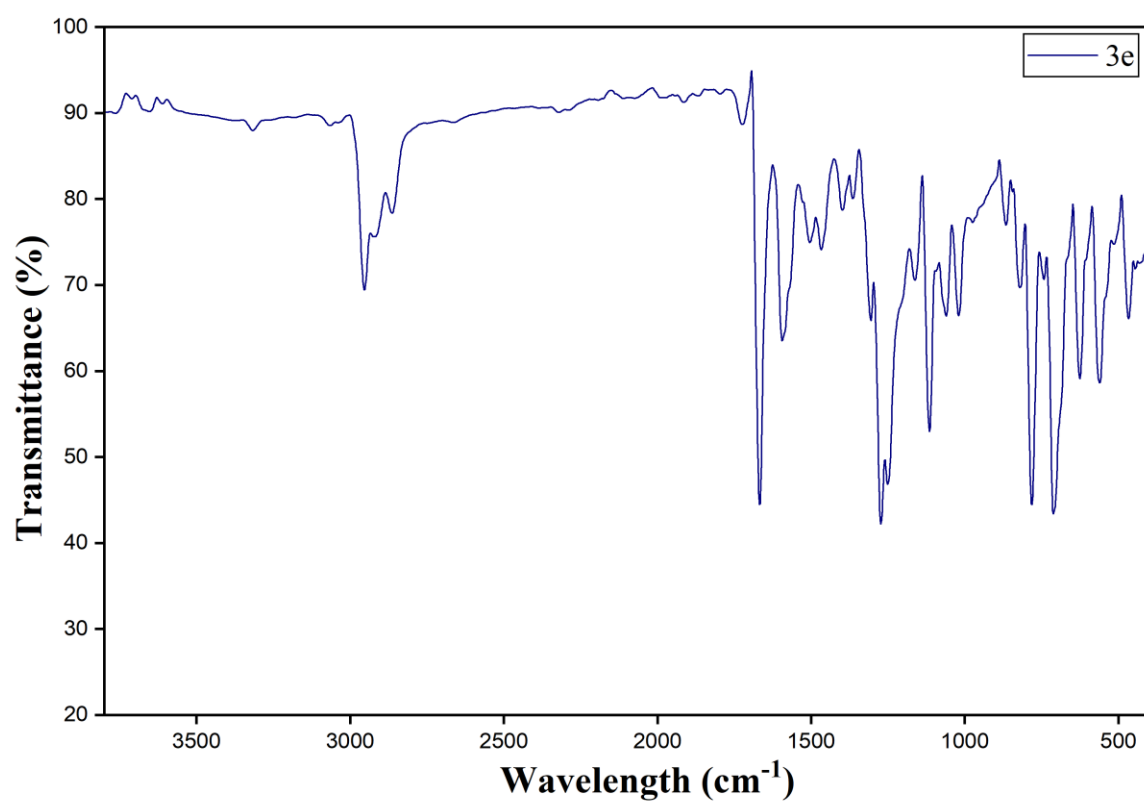

<sup>1</sup>H NMR (400 MHz, CDCl<sub>3</sub>)

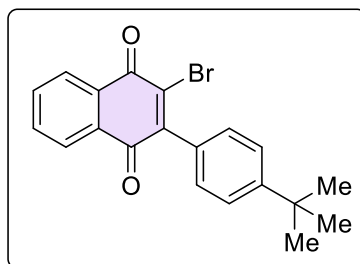

**2-bromo-3-(4-(*tert*-butyl)phenyl)naphthalene-1,4-dione (3e)**

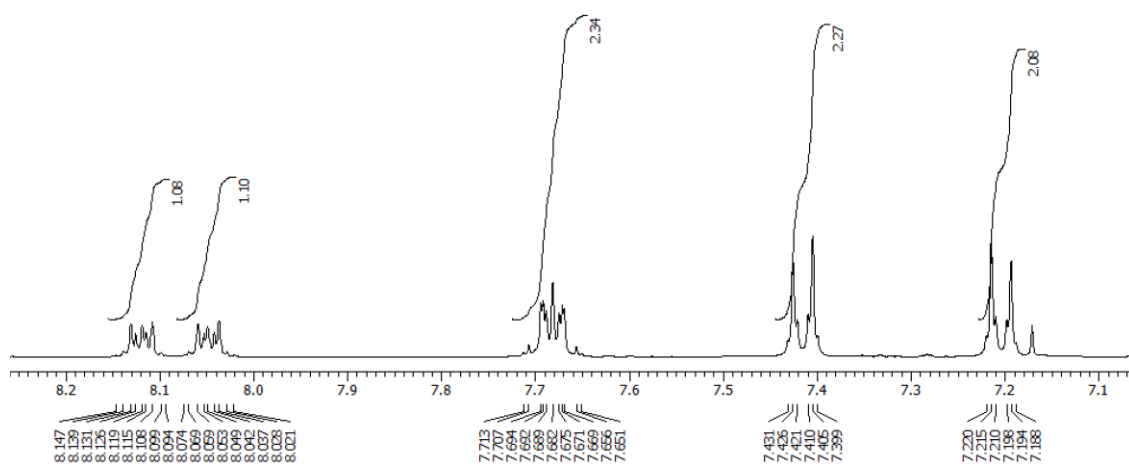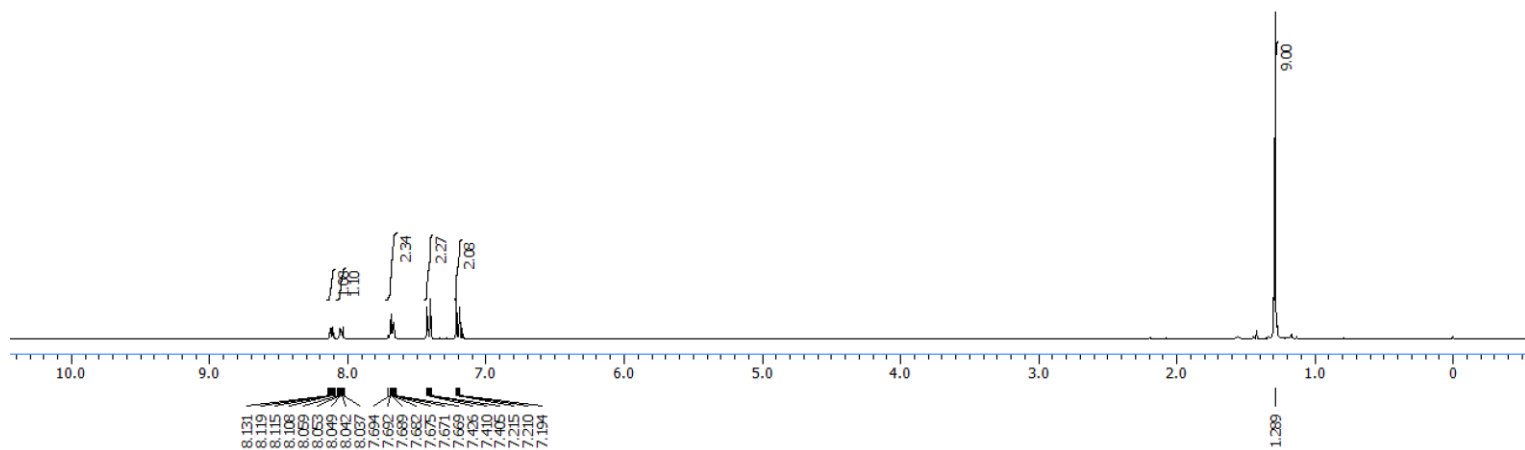

$^{13}\text{C}\{^1\text{H}\}$  NMR (100 MHz,  $\text{CDCl}_3$ )

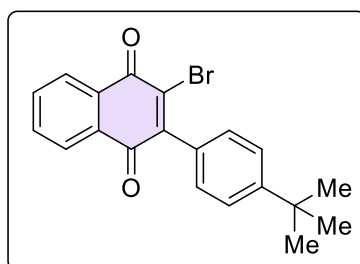

2-bromo-3-(4-(*tert*-butyl)phenyl)naphthalene-1,4-dione (3e)

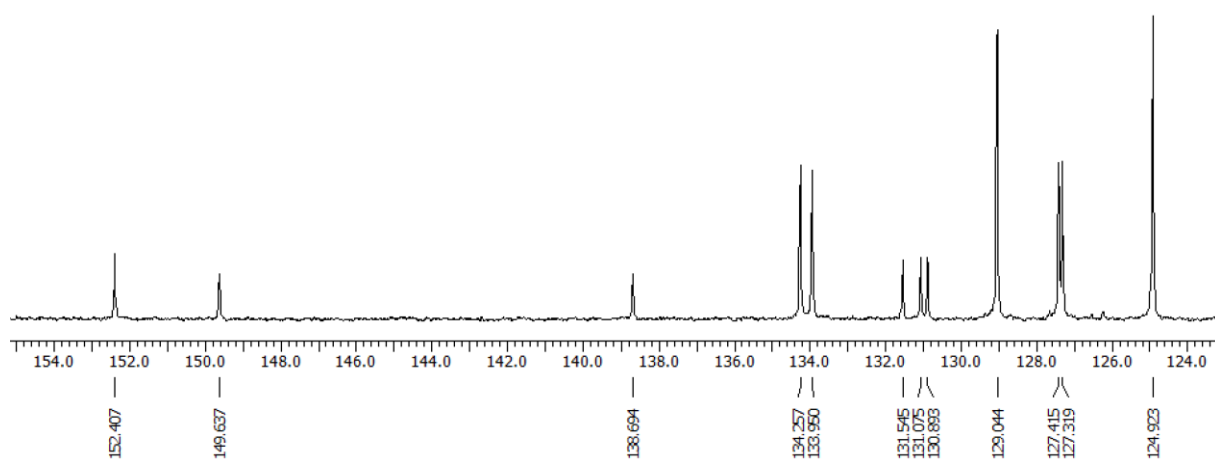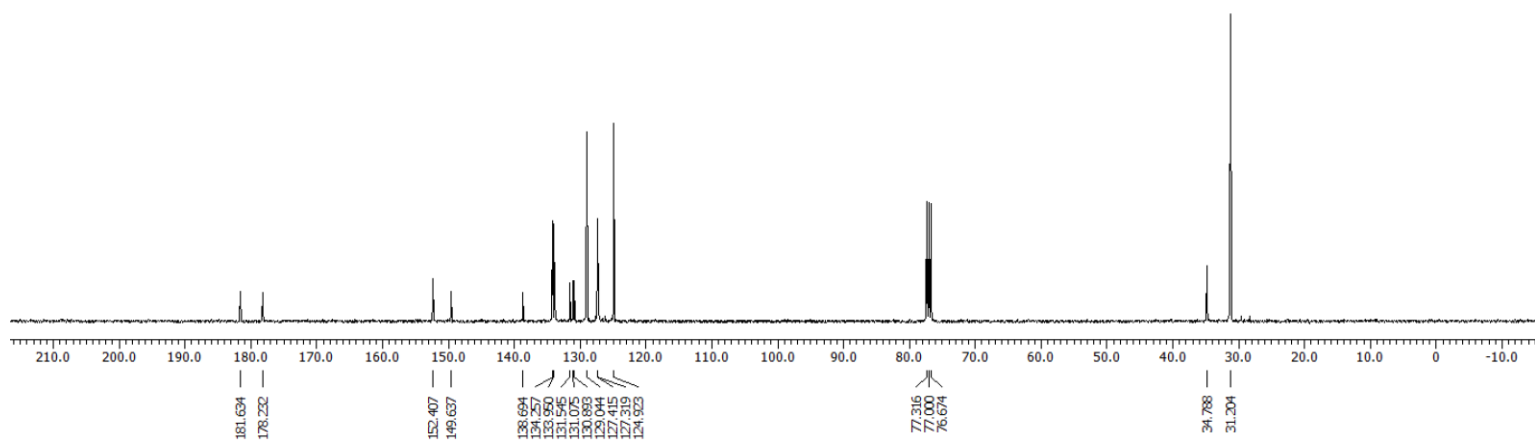



# HRMS

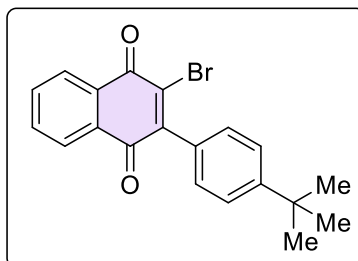

**2-bromo-3-(4-(*tert*-butyl)phenyl)naphthalene-1,4-dione (3e)**

## Qualitative Compound Report

Data File: MNS-313.d  
Sample Type: Sample  
Instrument Name: Instrument 1  
Acq Method: MS Scan.m  
IRM Calibration Status: Success  
Comment:  
Sample Group: Info. 3  
Acquisition SW: 6200 series TOF/6500 series  
Version: Q-TOF B.05.01 (05125)

Sample Name: MNS-313  
Position: P1-A6  
User Name:  
Acquired Time: 04-03-2025 12:57:15  
DA Method: Default.m

| Compound Label       | RT    | Mass     | Abund | Formula       | Tgt Mass | Diff (ppm) | MFG Formula   | DB Formula    |
|----------------------|-------|----------|-------|---------------|----------|------------|---------------|---------------|
| Cpd 1: C20 H17 Br O2 | 0.159 | 368.0424 | 32372 | C20 H17 Br O2 | 368.0412 | 3.28       | C20 H17 Br O2 | C20 H17 Br O2 |

| Compound Label       | m/z      | RT    | Algorithm       | Mass     |
|----------------------|----------|-------|-----------------|----------|
| Cpd 1: C20 H17 Br O2 | 371.0478 | 0.159 | Find By Formula | 368.0424 |

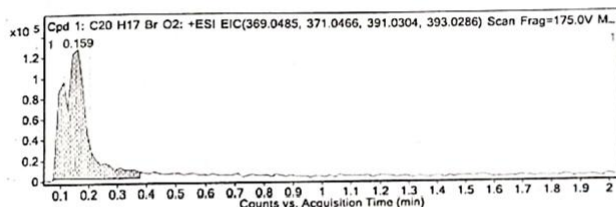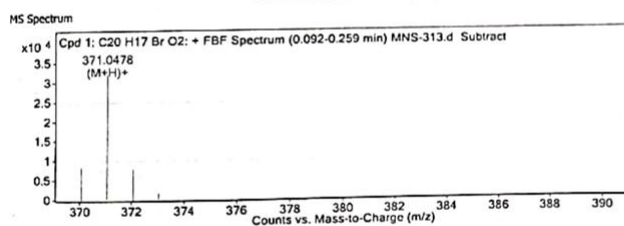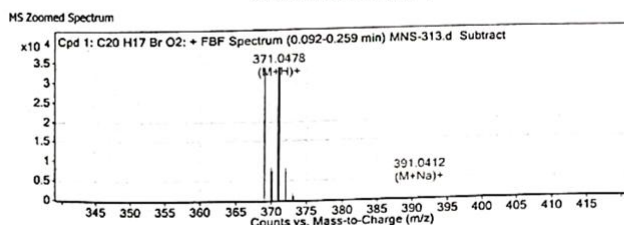

| m/z      | z | Abund    | Formula      | Ion     |
|----------|---|----------|--------------|---------|
| 369.0497 | 1 | 32357.64 | C20H18BrO2   | (M+H)+  |
| 370.0532 | 1 | 8269.11  | C20H18BrO2   | (M+H)+  |
| 371.0478 | 1 | 32372.27 | C20H18BrO2   | (M+H)+  |
| 372.0517 | 1 | 8049.56  | C20H18BrO2   | (M+H)+  |
| 373.0504 | 1 | 1769.93  | C20H18BrO2   | (M+H)+  |
| 391.0412 | 1 | 178.22   | C20H17BrNaO2 | (M+Na)+ |

--- End Of Report ---

## IR Spectra

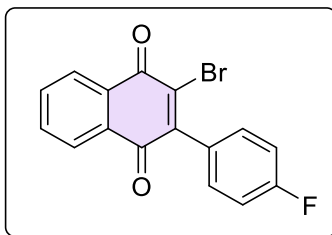

**2-bromo-3-(4-fluorophenyl)naphthalene-1,4-dione (3f)**

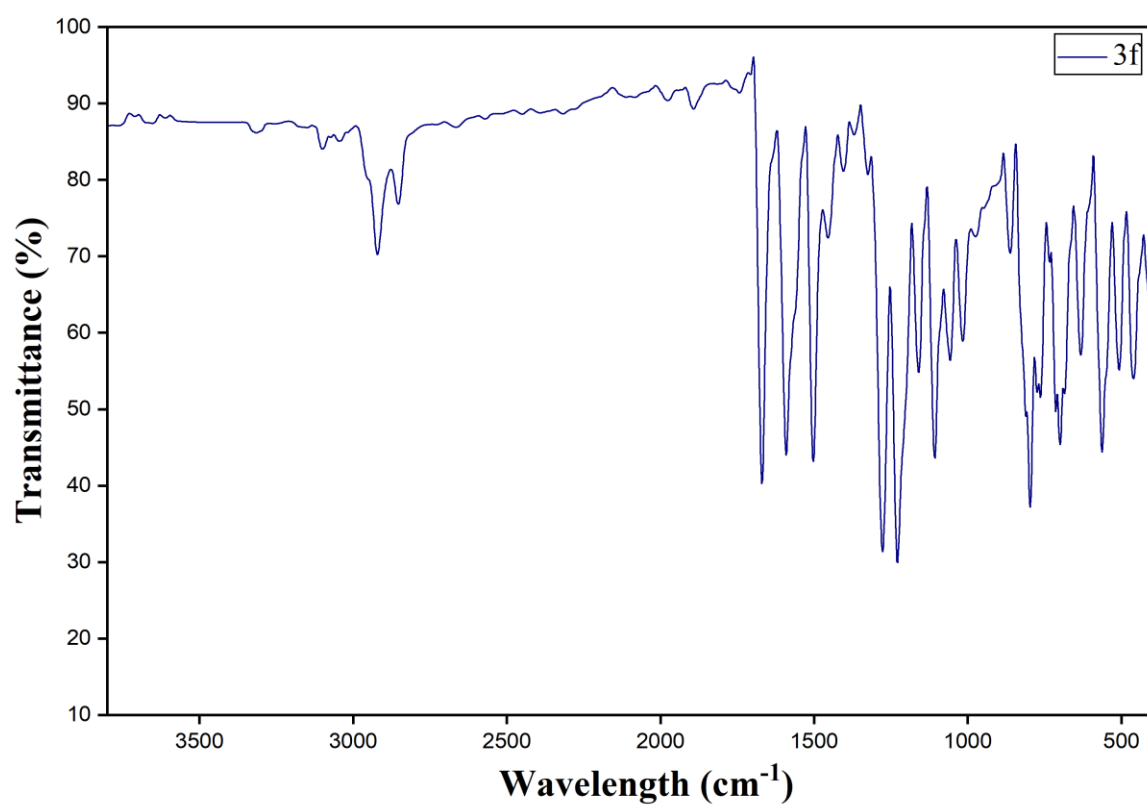

**<sup>1</sup>H NMR (400 MHz, CDCl<sub>3</sub>)**

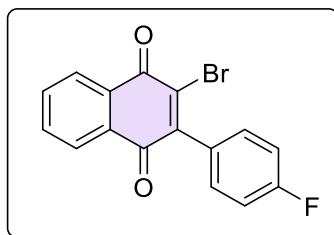

**2-bromo-3-(4-fluorophenyl)naphthalene-1,4-dione (3f)**

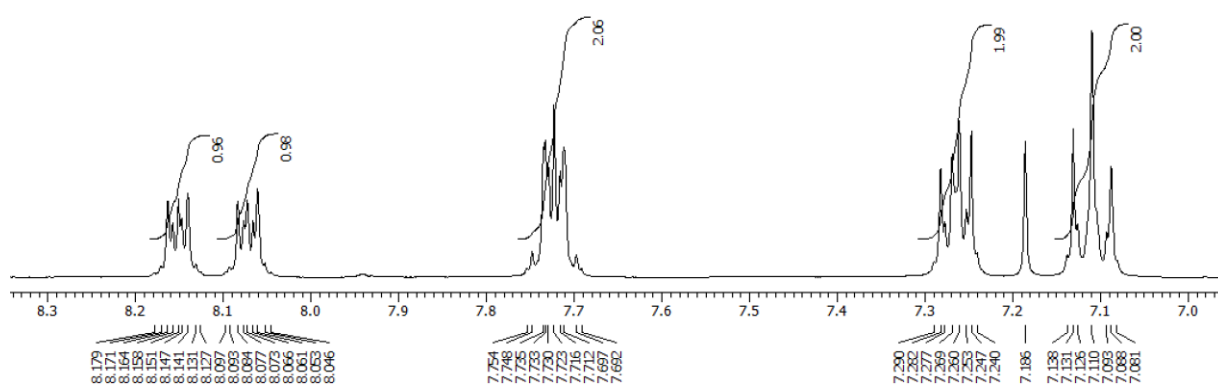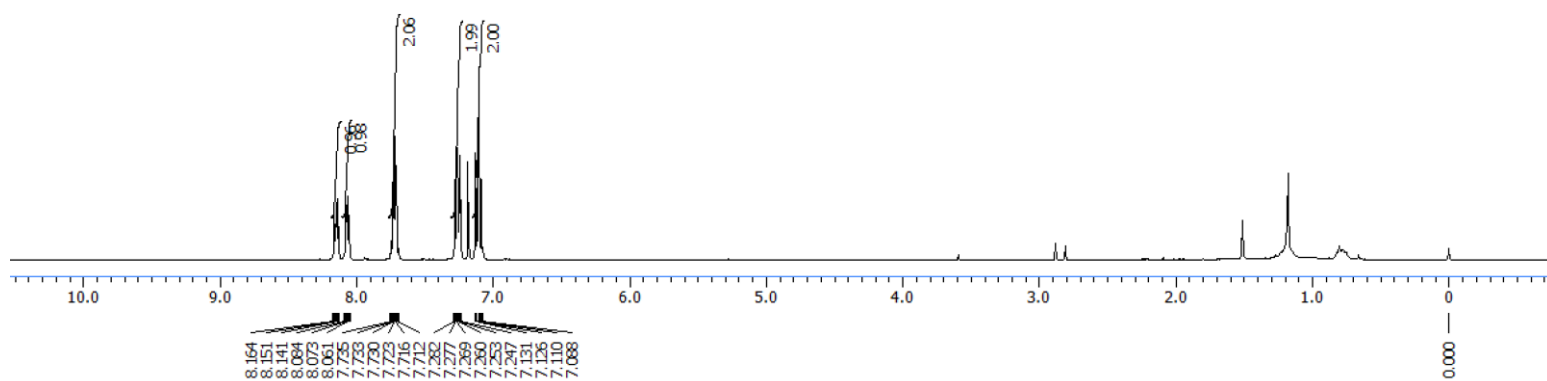

$^{13}\text{C}\{^1\text{H}\}$  NMR (100 MHz,  $\text{CDCl}_3$ )

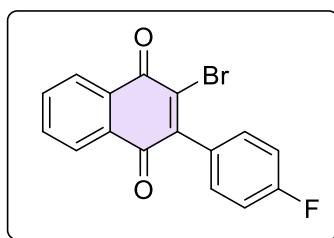

2-bromo-3-(4-fluorophenyl)naphthalene-1,4-dione (3f)

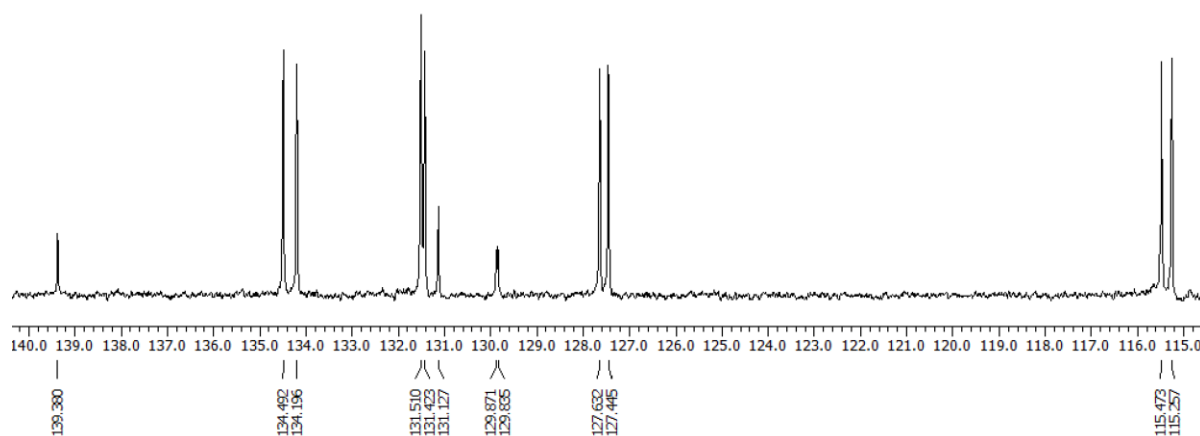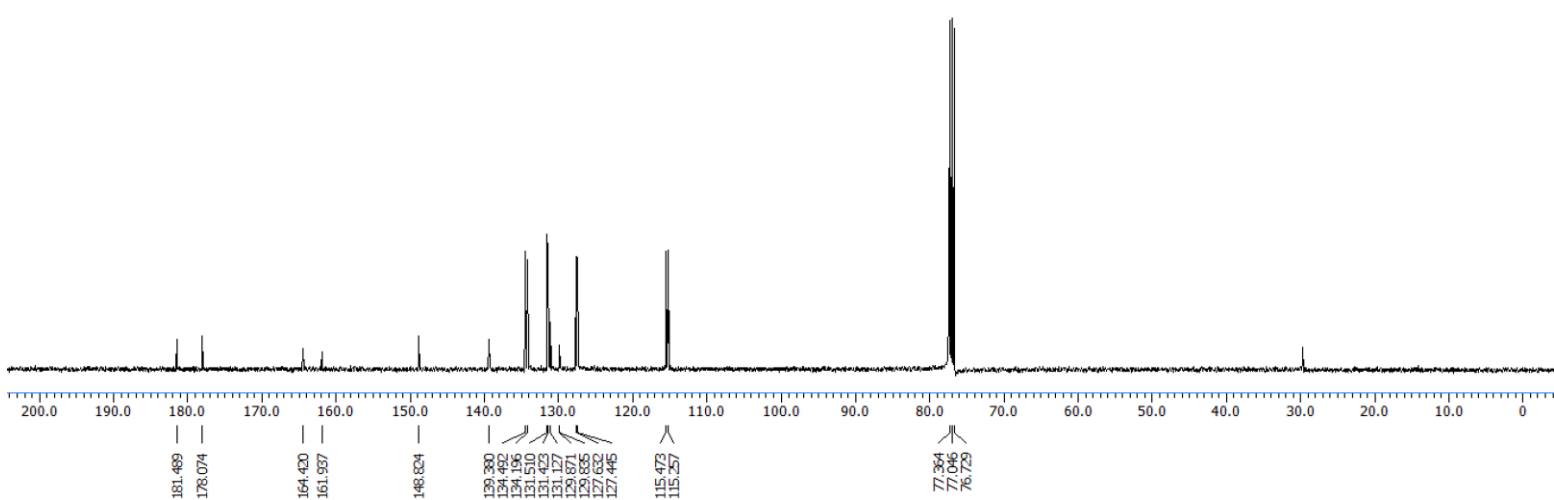

**$^{19}\text{F}$  NMR (376 MHz,  $\text{CDCl}_3$ )**



**2-bromo-3-(4-fluorophenyl)naphthalene-1,4-dione (3f)**

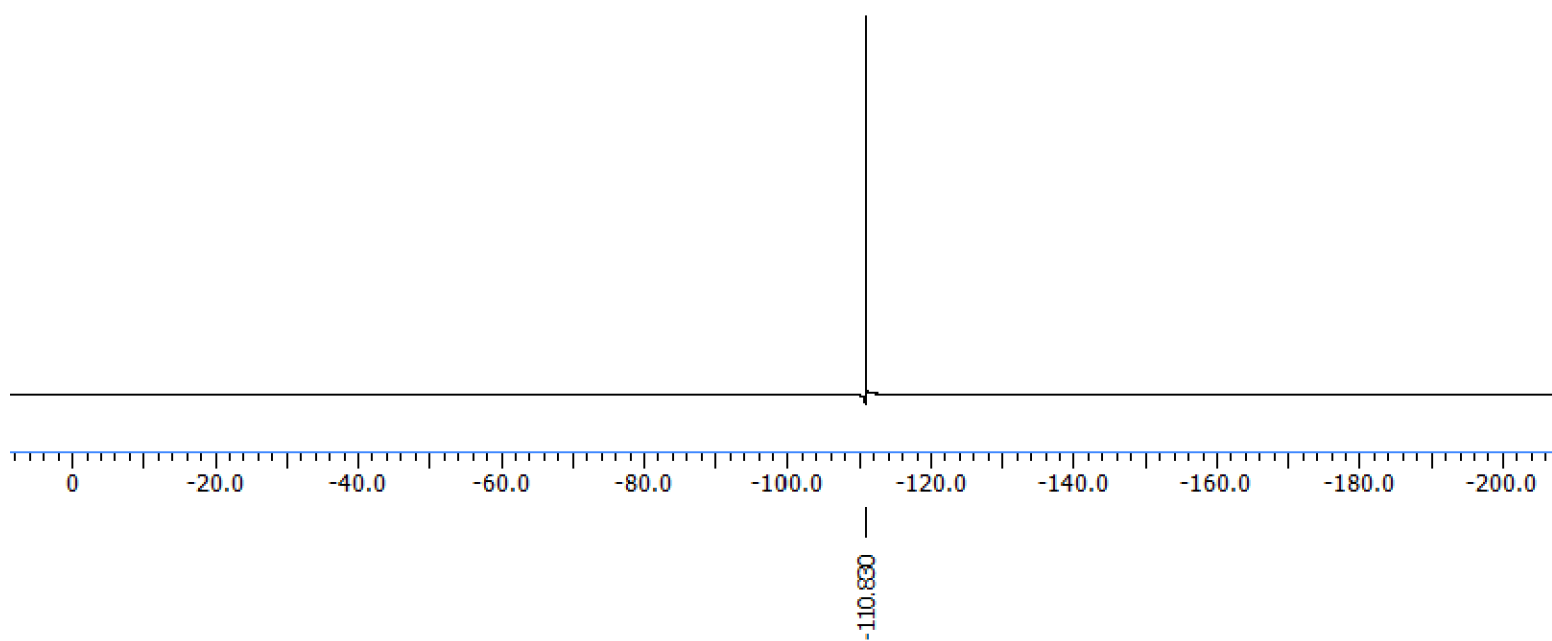

# HRMS

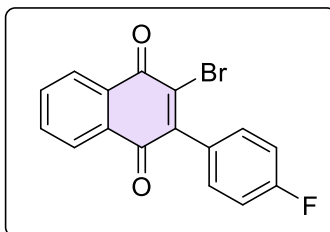

2-bromo-3-(4-fluorophenyl)naphthalene-1,4-dione (3f)

## Qualitative Compound Report

Data File: MNS-302.d  
Sample Type: Sample  
Instrument Name: Instrument 1  
Acq Method: MS Scan.m  
IRM Calibration Status: Success  
Comment:  
Sample Name: MNS-302  
Position: P1-A4  
User Name:  
Acquired Time: 13-05-2024 14:20:15  
DA Method: Default.m

Sample Group: Info. 3  
Acquisition SW: 6200 series TOF/6500 series  
Version: Q-TOF B.05.01 (B5125)

### Compound Table

| Compound Label        | RT    | Mass     | Abund | Formula        | Tgt Mass | Diff (ppm) | MFG Formula    | DB Formula     |
|-----------------------|-------|----------|-------|----------------|----------|------------|----------------|----------------|
| Cpd 1: C16 H8 Br F O2 | 0.102 | 329.9712 | 8767  | C16 H8 Br F O2 | 329.9692 | 6.09       | C16 H8 Br F O2 | C16 H8 Br F O2 |

| Compound Label        | m/z      | RT    | Algorithm       | Mass     |
|-----------------------|----------|-------|-----------------|----------|
| Cpd 1: C16 H8 Br F O2 | 332.9763 | 0.102 | Find By Formula | 329.9712 |

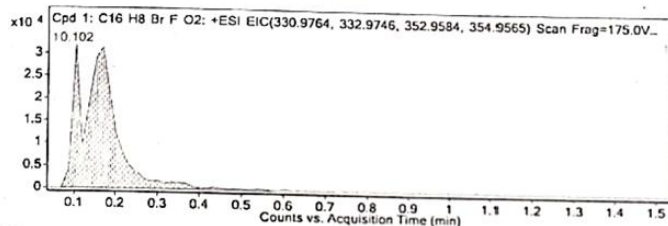

### MS Spectrum

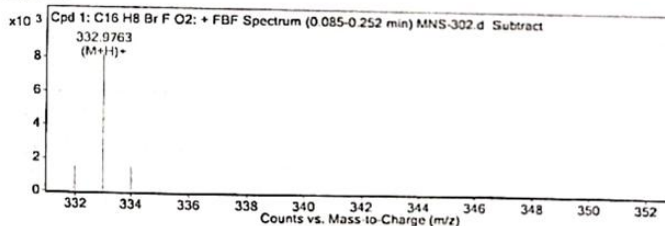

### MS Zoomed Spectrum

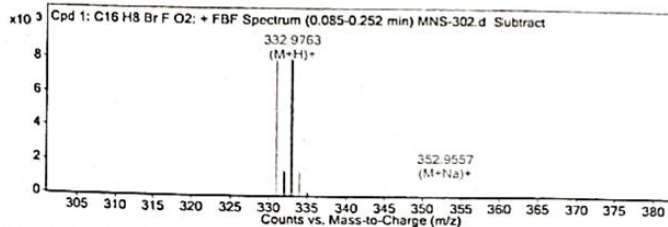

### MS Spectrum Peak List

| m/z      | z | Abund   | Formula      | Ion     |
|----------|---|---------|--------------|---------|
| 330.9765 | 1 | 7443.49 | C16H8BrFO2   | (M+H)+  |
| 331.9829 | 1 | 1502.41 | C16H8BrFO2   | (M+H)+  |
| 332.9763 | 1 | 8267.29 | C16H8BrFO2   | (M+H)+  |
| 333.9802 | 1 | 1465.49 | C16H8BrFO2   | (M+H)+  |
| 334.9861 | 1 | 220.44  | C16H8BrFO2   | (M+H)+  |
| 352.9557 | 1 | 61.64   | C16H8BrFNaO2 | (M+Na)+ |

--- End Of Report ---

## IR Spectra

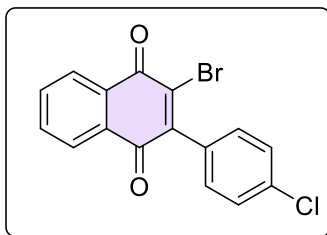

**2-bromo-3-(4-chlorophenyl)naphthalene-1,4-dione (3g)**

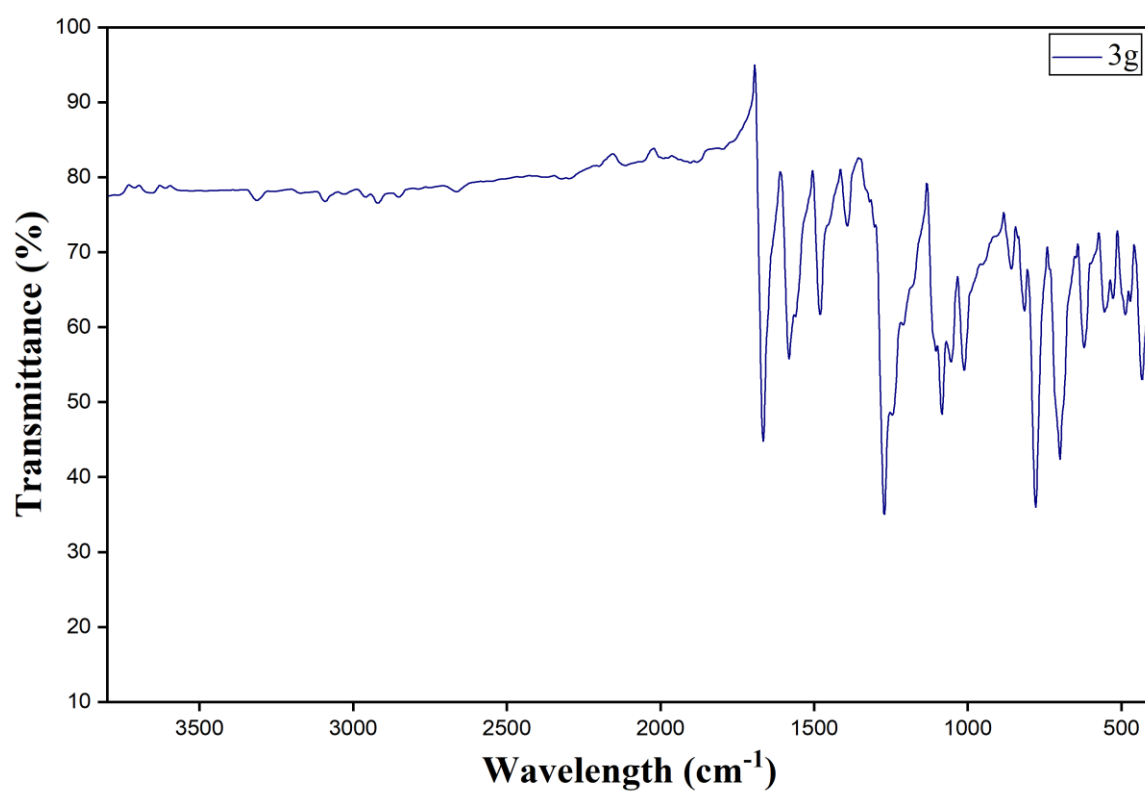

**<sup>1</sup>H NMR (400 MHz, CDCl<sub>3</sub>)**

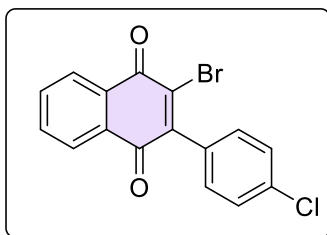

**2-bromo-3-(4-chlorophenyl)naphthalene-1,4-dione (3g)**

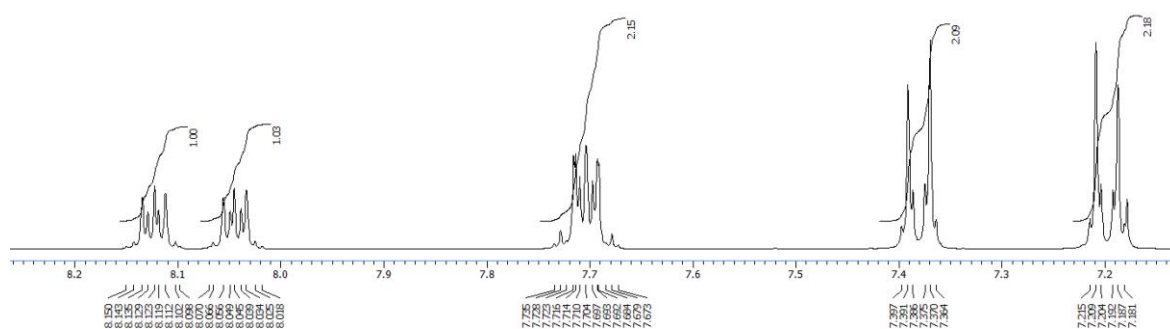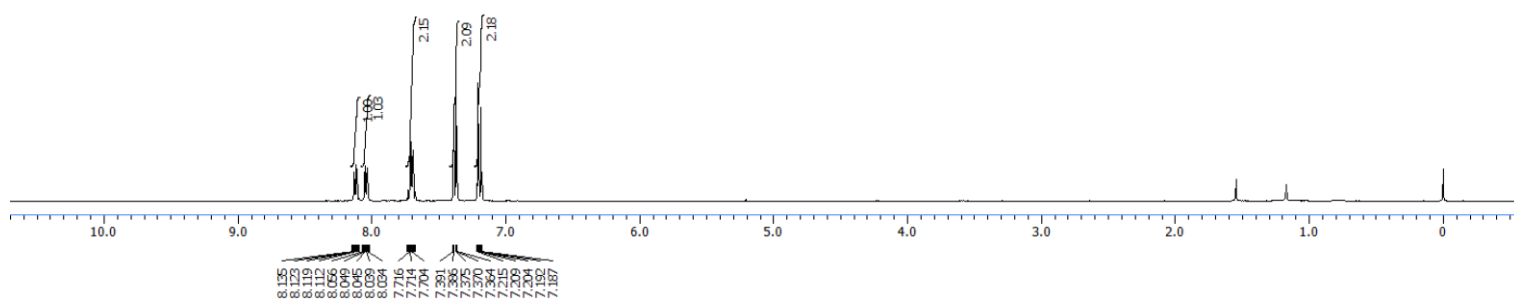



$^{13}\text{C}\{^1\text{H}\}$  NMR (100 MHz,  $\text{CDCl}_3$ )

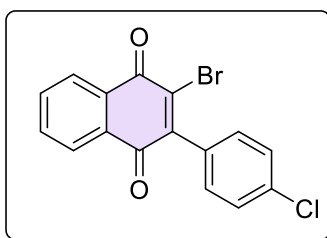

**2-bromo-3-(4-chlorophenyl)naphthalene-1,4-dione (3g)**

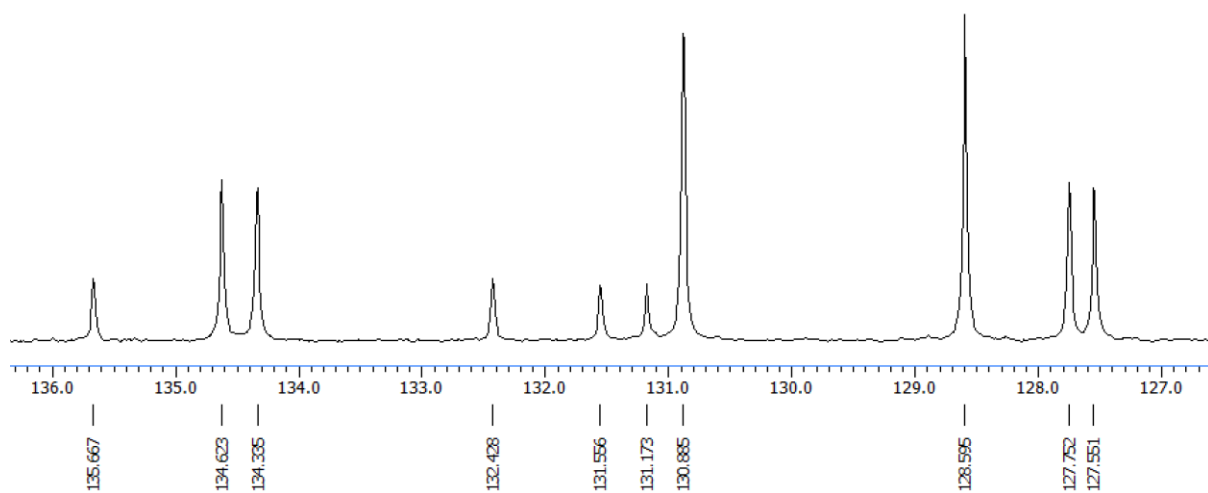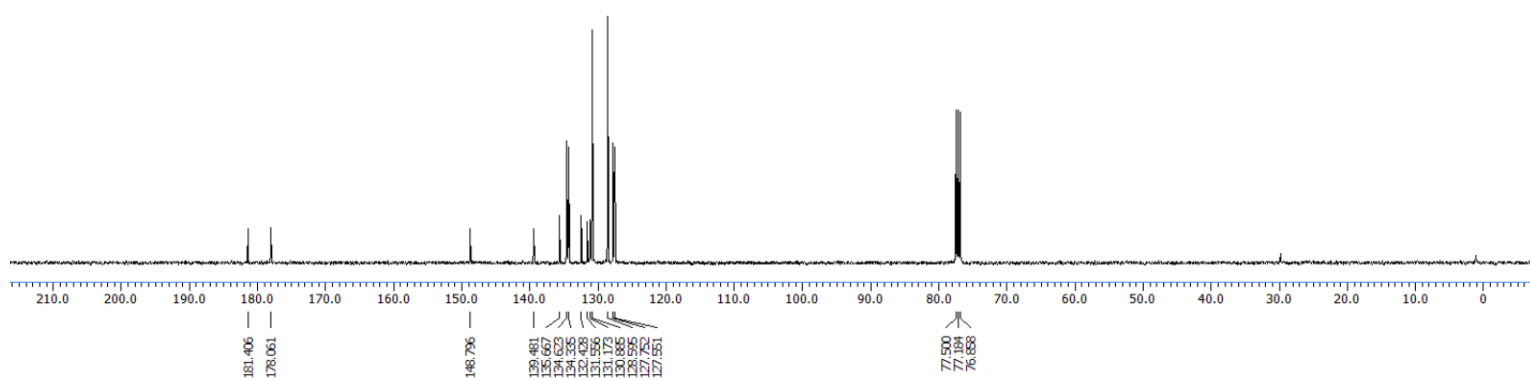

## IR Spectra

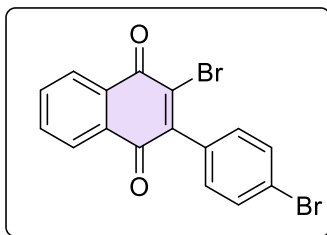

**2-bromo-3-(4-bromophenyl)naphthalene-1,4-dione (3h)**

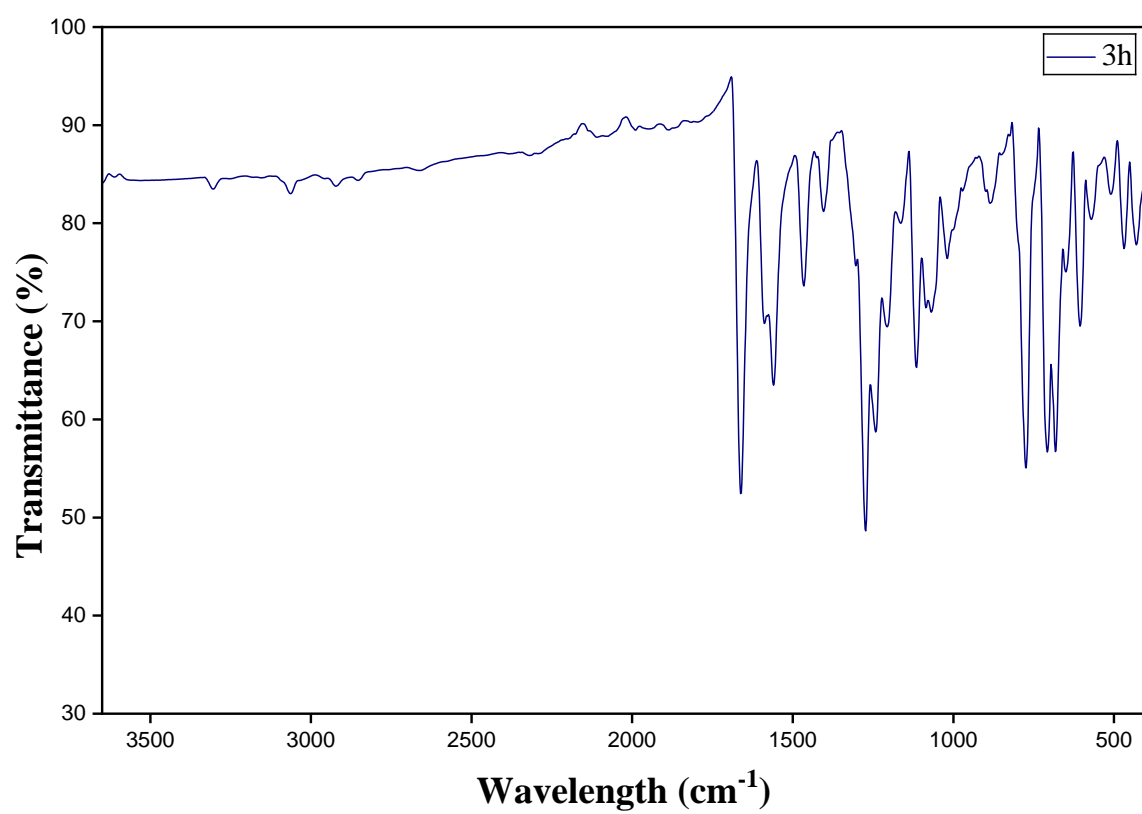

**$^1\text{H}$  NMR (400 MHz,  $\text{CDCl}_3$ )**

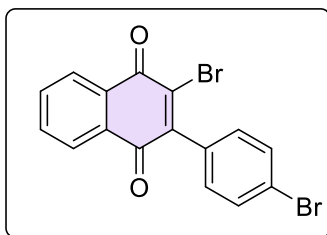

**2-bromo-3-(4-bromophenyl)naphthalene-1,4-dione (3h)**

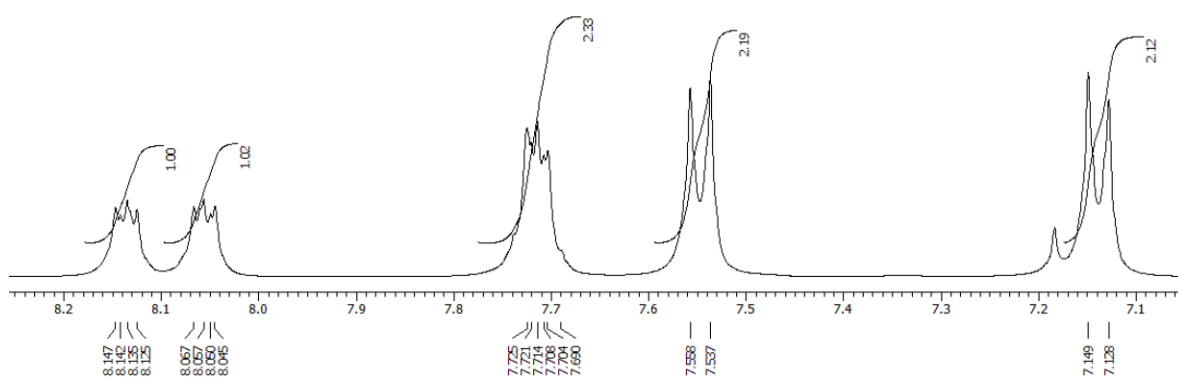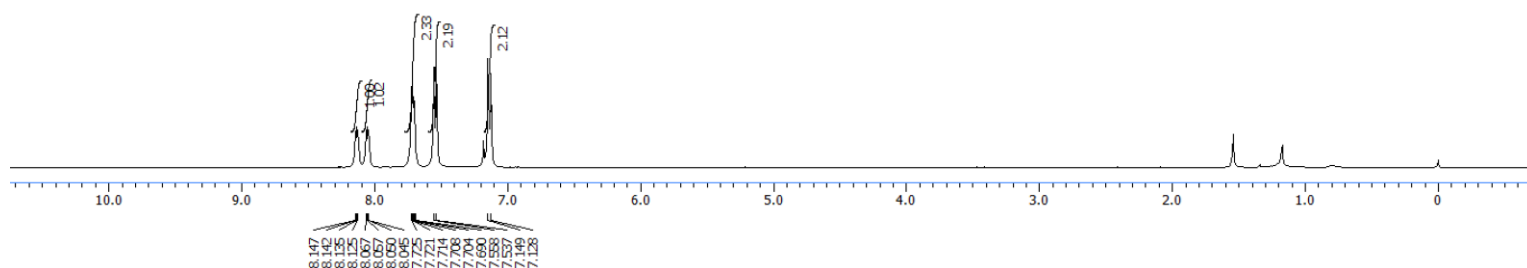

$^{13}\text{C}\{^1\text{H}\}$  NMR (100 MHz,  $\text{CDCl}_3$ )



2-bromo-3-(4-bromophenyl)naphthalene-1,4-dione (3h)

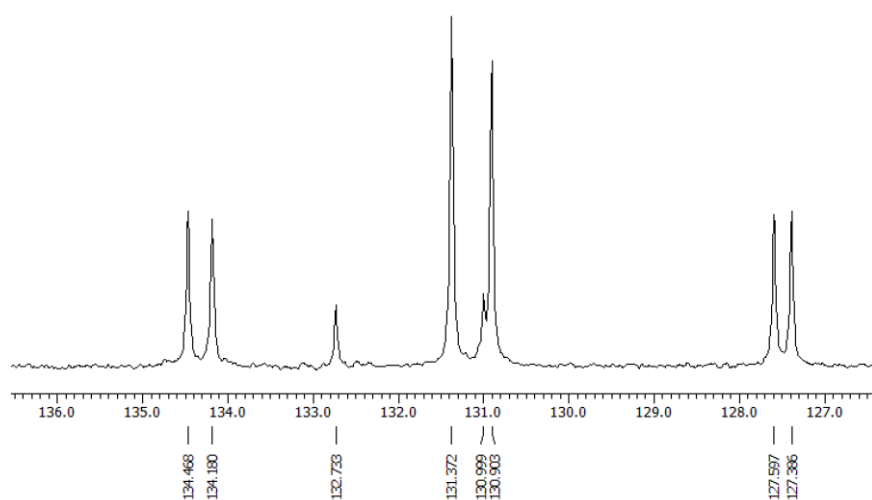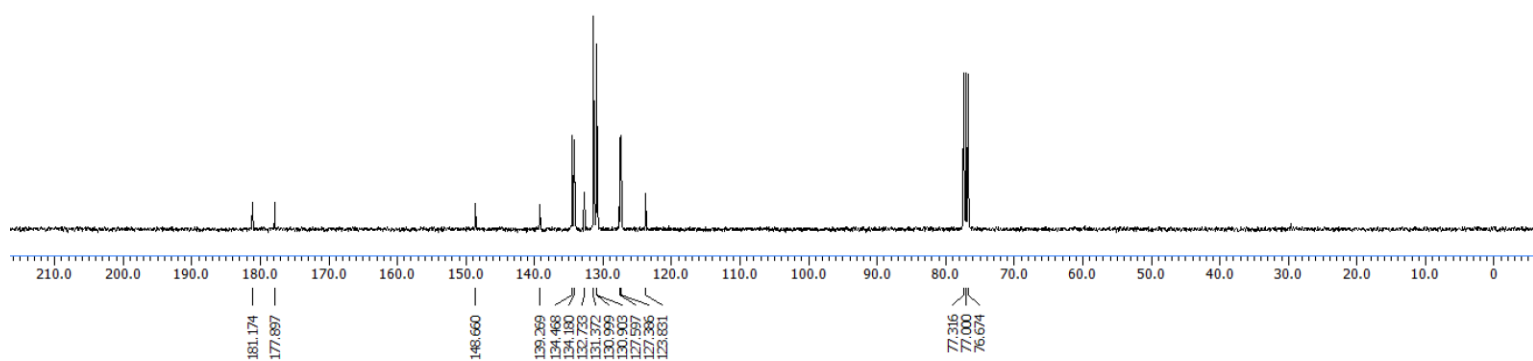

# HRMS



2-bromo-3-(4-bromophenyl)naphthalene-1,4-dione (3h)

## Compound Screening Report

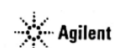

### Sample Information

|                 |                 |                    |                                                       |
|-----------------|-----------------|--------------------|-------------------------------------------------------|
| Sample Name     | MNS-351         | Data File Path     | D:\Projects\demo & training\Data\MNS-351.d            |
| Sample ID       |                 | Acq Time (Local)   | 01-08-2025 13:07:08 (UTC+05:30)                       |
| Instrument      | BIO-QTOF        | Acq Method Path    | D:\Projects\demo & training\Methods\demo.m            |
| MS Type         | QTOF            | Acq SW Version     | 6500 series Q-TOF (12.1.58.0)                         |
| Inj Vol (ul)    | 1               | IRM Status         | Success                                               |
| Sample Position | P1-M4           | DA Method Path     | D:\Projects\instrument_Verification\Methods\default.m |
| Plate Position  |                 | Target Source Path |                                                       |
| Acq Operator    | SYSTEM (SYSTEM) | Result Summary     | 1 qualified (1 targets)                               |

### Sample Chromatograms

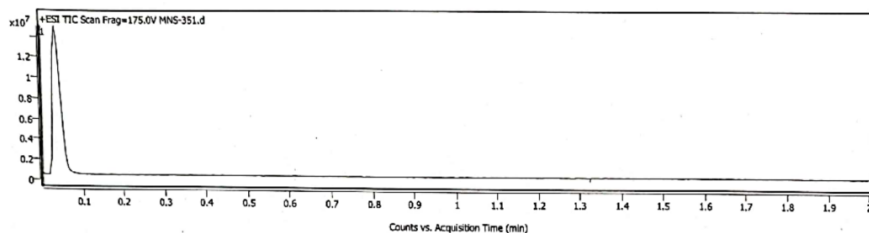

### Compound Summary

| Cpd | Name          | Formula | CAS | RT    | Mass     | Mass (Tgt) | Diff (Tgt, ppm) | Score | Algorithm |
|-----|---------------|---------|-----|-------|----------|------------|-----------------|-------|-----------|
| 1   | C16 H8 Br2 O2 |         |     | 0.042 | 389.8903 | 389.8891   | 3.16            | 67.25 | FBF       |

### Compound Details

Cpd 1: C16 H8 Br2 O2

| Name          | Formula  | RT          | RI          | Mass       | Diff (Tgt, ppm) | CAS        | ID Source | Score | Algorithm |
|---------------|----------|-------------|-------------|------------|-----------------|------------|-----------|-------|-----------|
| C16 H8 Br2 O2 |          | 0.042       |             | 389.8903   | 3.16            |            | FBF       | 67.25 | FBF       |
| Species       | m/z      | Score (Tgt) | Score (Lib) | Score (DB) | Score (MFG)     | Score (RT) |           |       |           |
| (M+H)+        | 390.8973 | 67.25       |             |            |                 |            |           |       |           |

### Compound Chromatograms (overlay)

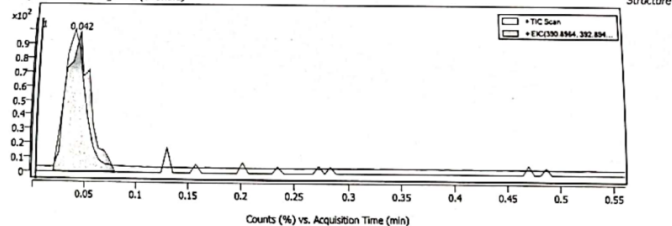

### Compound Spectra (overlay)

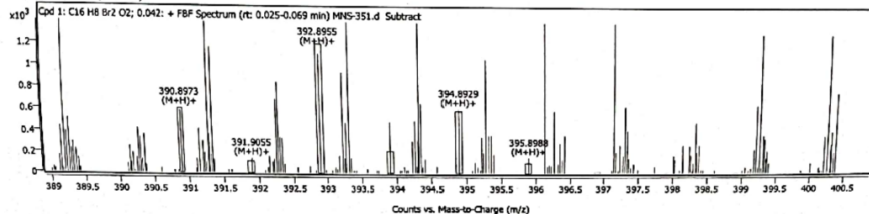

### Compound ID Table

| Name          | Formula | Species | RT    | RT Diff | Mass     | CAS | ID Source | Score | Score (Lib) | Score (Tgt) |
|---------------|---------|---------|-------|---------|----------|-----|-----------|-------|-------------|-------------|
| C16 H8 Br2 O2 |         | (M+H)+  | 0.042 |         | 389.8903 |     | FBF       | 67.25 |             | 67.25       |

MassHunter Qual 12.0  
(End of Report)

## IR Spectra

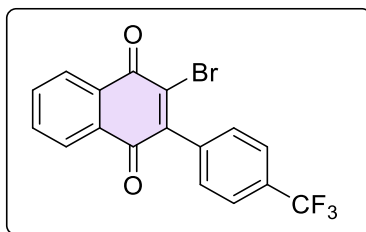

**2-bromo-3-(4-(trifluoromethyl)phenyl)naphthalene-1,4-dione (3i)**

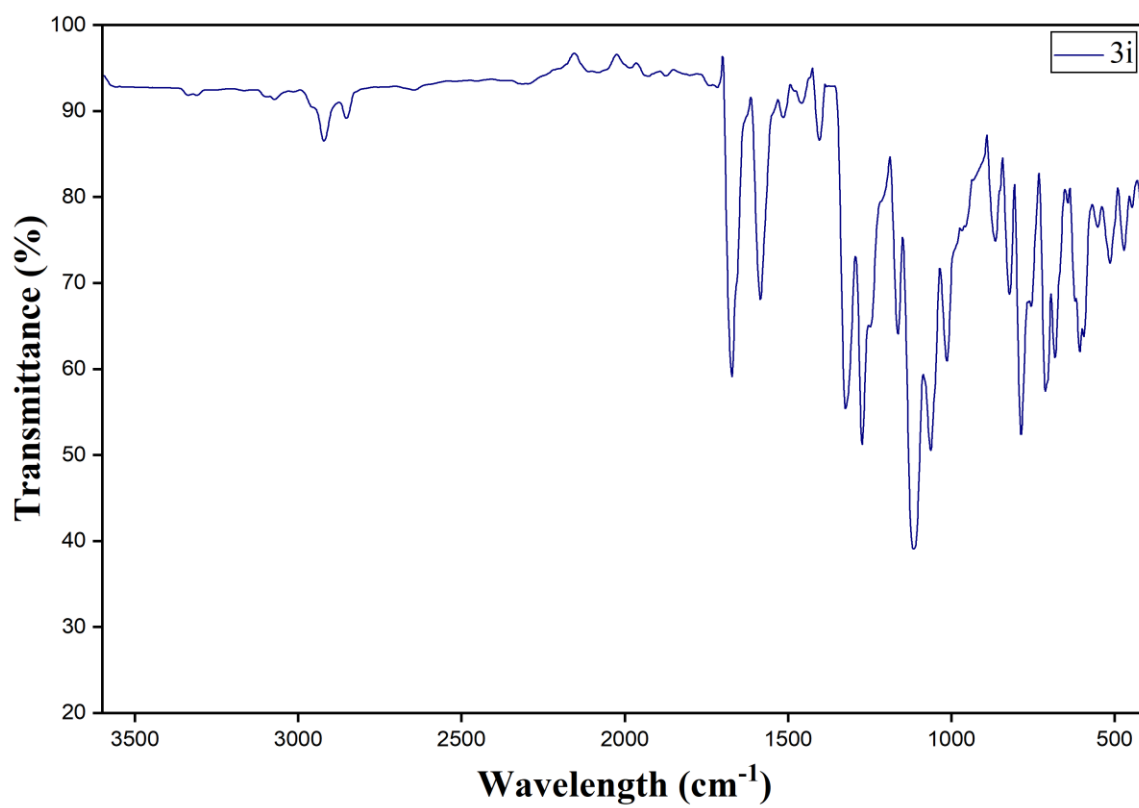

<sup>1</sup>H NMR (400 MHz, CDCl<sub>3</sub>)

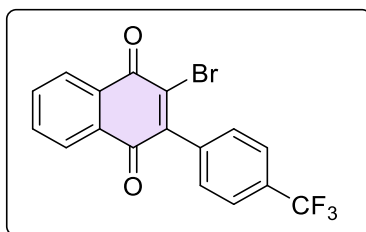

**2-bromo-3-(4-(trifluoromethyl)phenyl)naphthalene-1,4-dione (3i)**

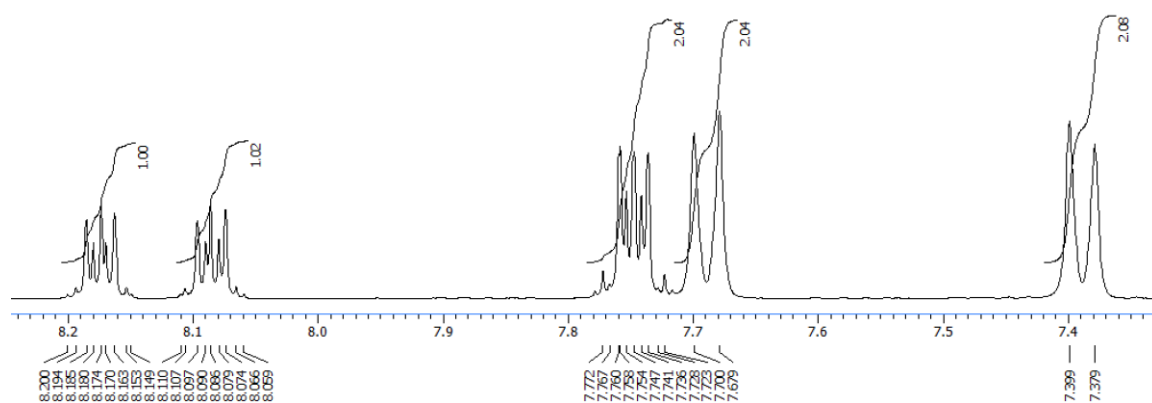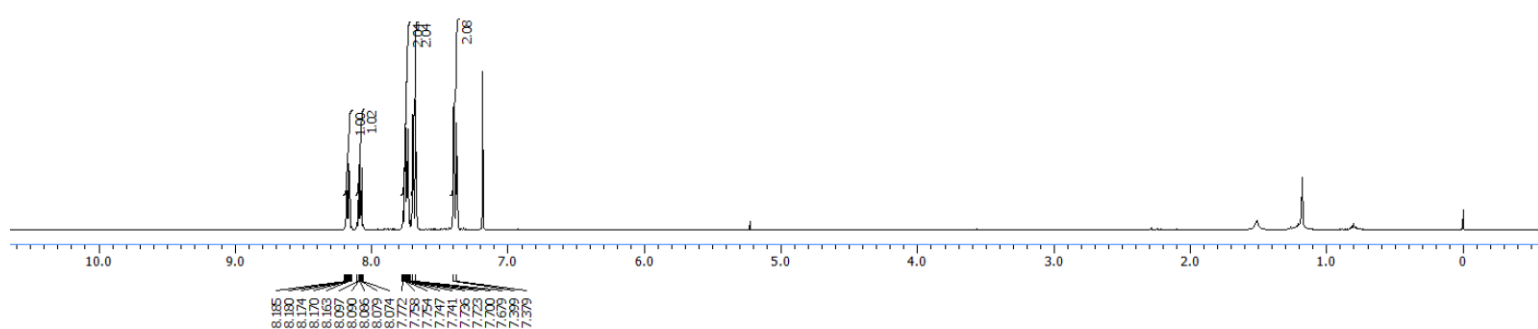

**$^{13}\text{C}$  NMR (100 MHz,  $\text{CDCl}_3$ )**

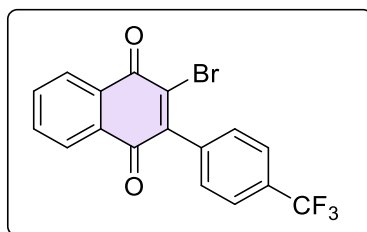

**2-bromo-3-(4-(trifluoromethyl)phenyl)naphthalene-1,4-dione (3i)**

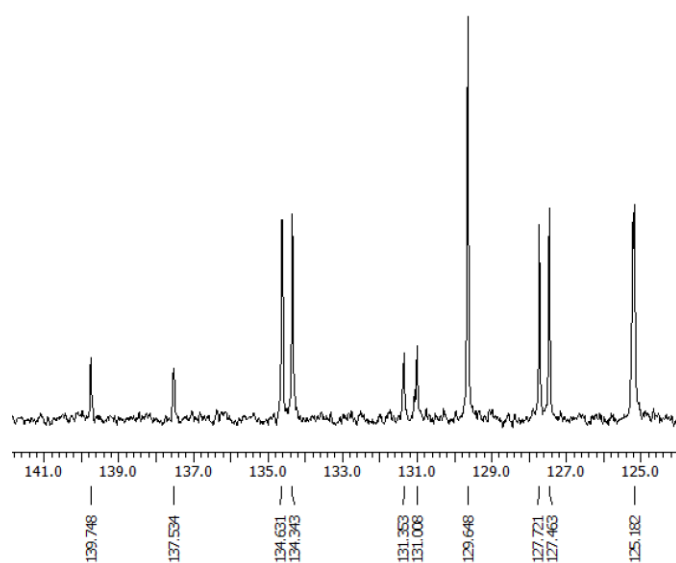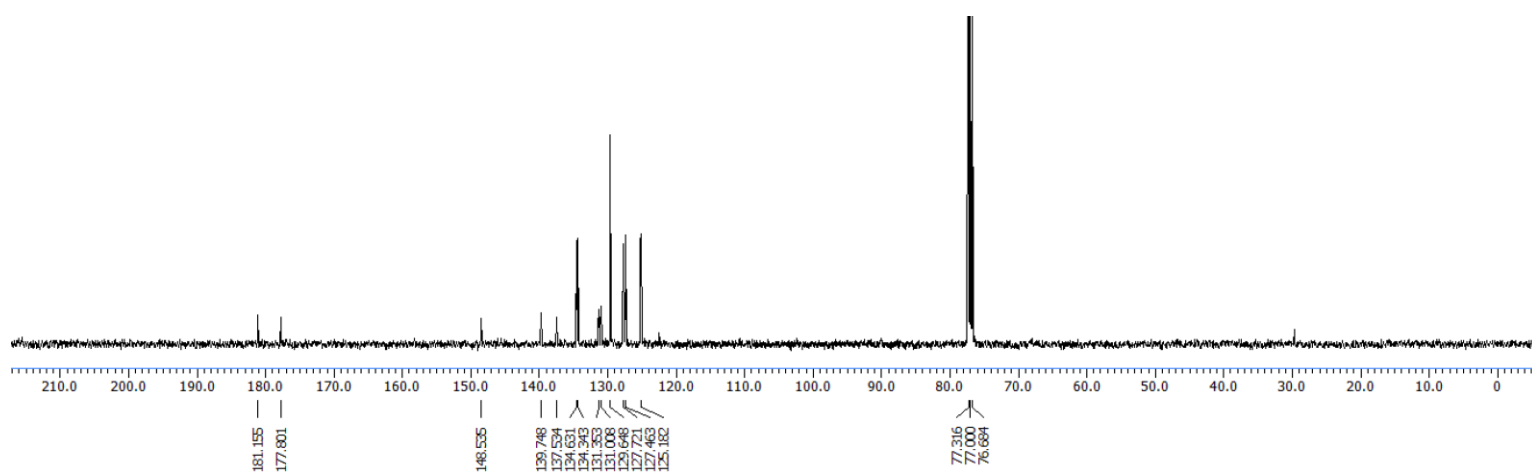



**$^{19}\text{F}$  NMR (376 MHz,  $\text{CDCl}_3$ )**

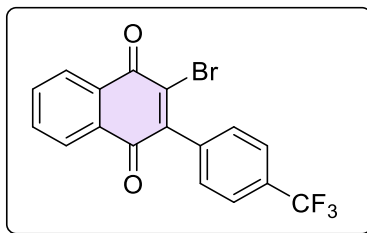

**2-bromo-3-(4-(trifluoromethyl)phenyl)naphthalene-1,4-dione (3i)**

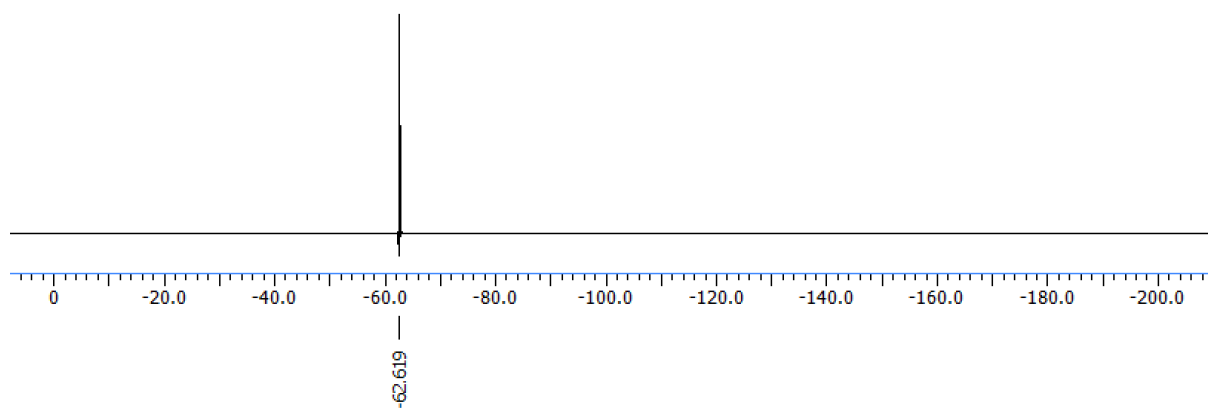

## IR Spectra

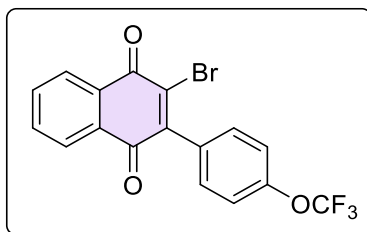

**2-bromo-3-(4-(trifluoromethoxy)phenyl)naphthalene-1,4-dione (3j)**

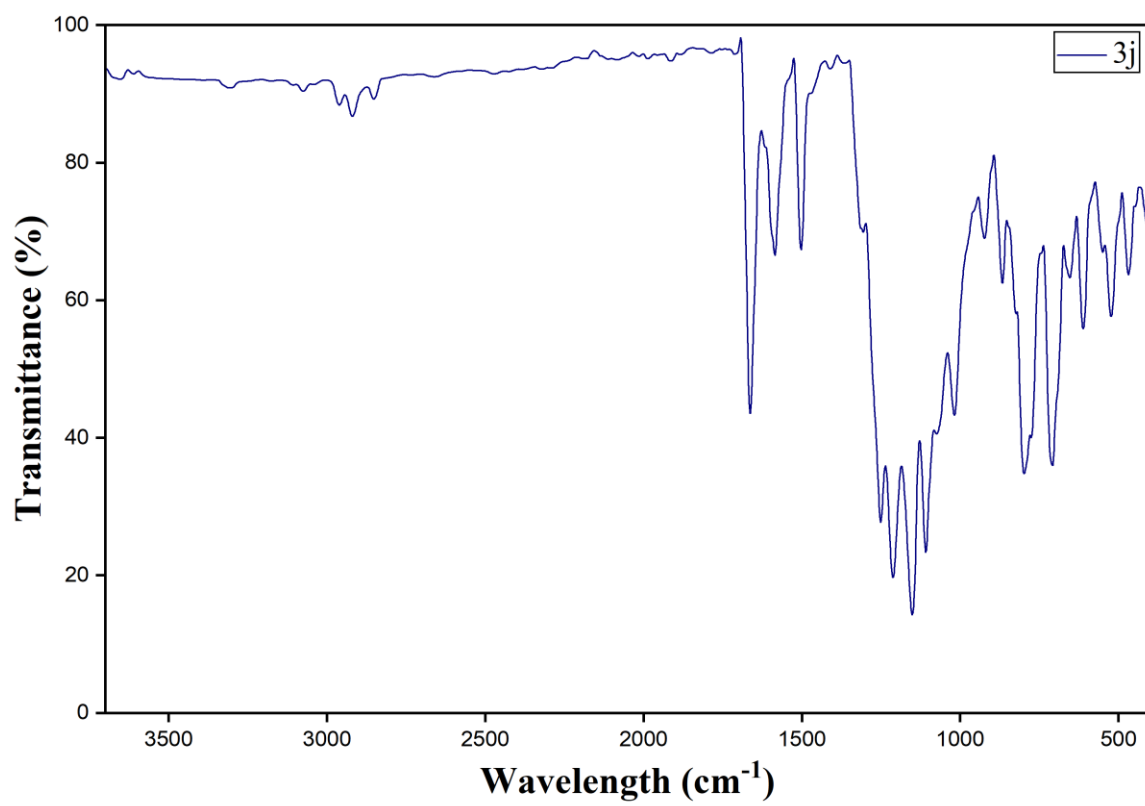

<sup>1</sup>H NMR (400 MHz, CDCl<sub>3</sub>)

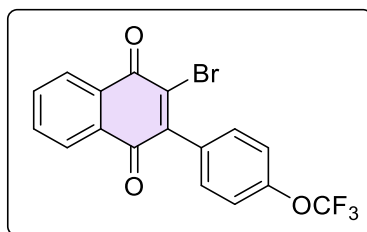

**2-bromo-3-(4-(trifluoromethoxy)phenyl)naphthalene-1,4-dione (3j)**

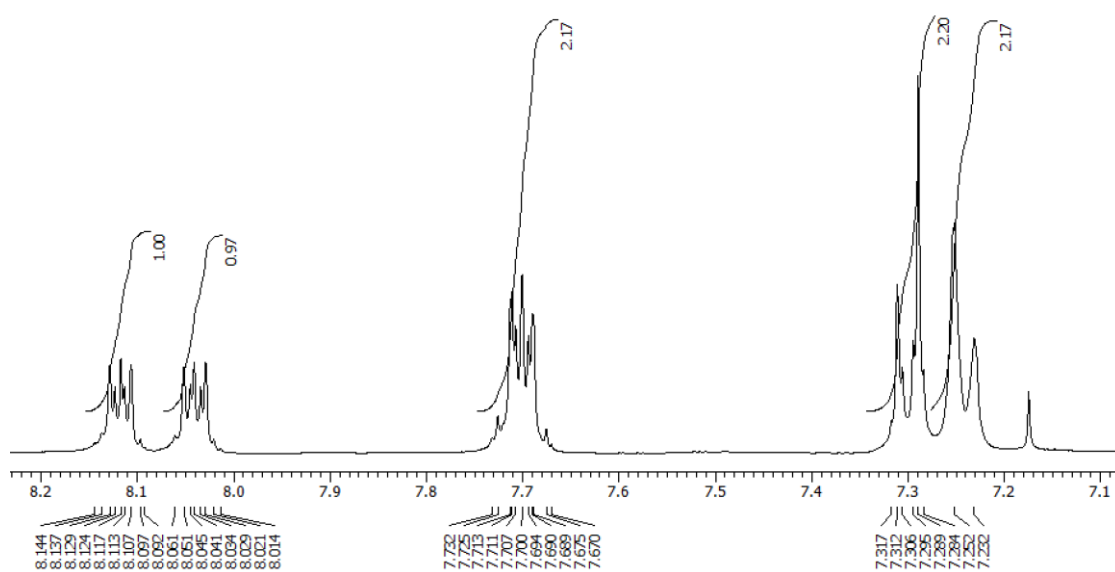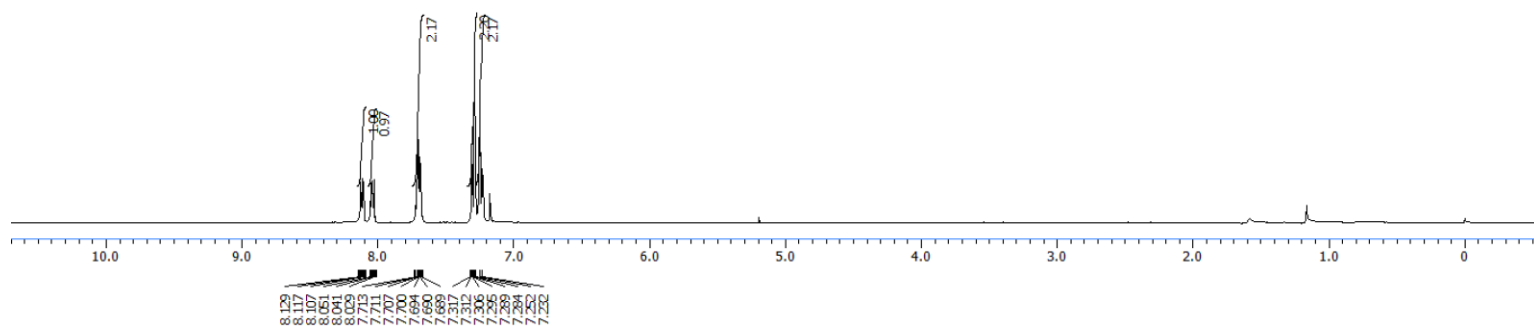

**$^{13}\text{C}$  NMR (100 MHz,  $\text{CDCl}_3$ )**



**2-bromo-3-(4-(trifluoromethoxy)phenyl)naphthalene-1,4-dione (3j)**

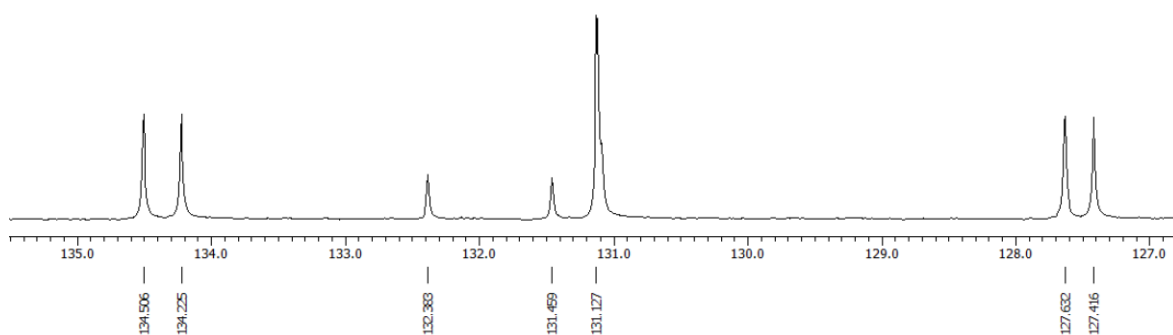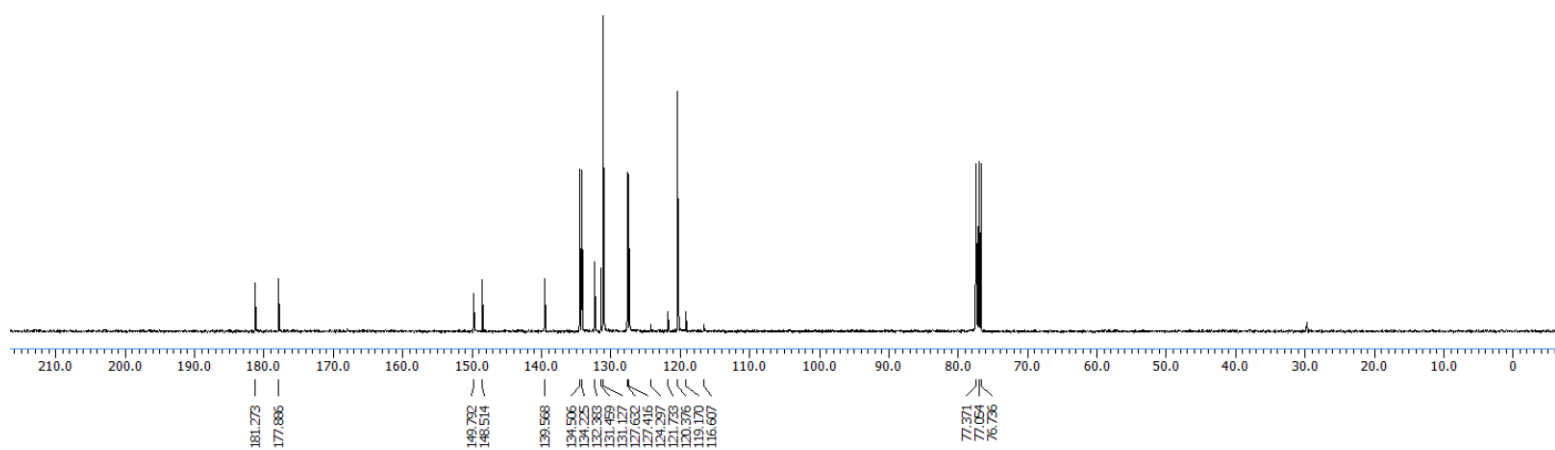

**$^{19}\text{F}$  NMR (376 MHz,  $\text{CDCl}_3$ )**

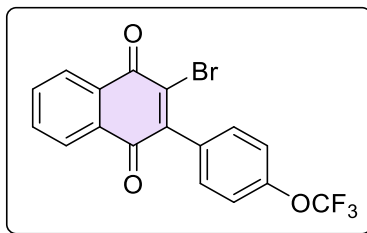

**2-bromo-3-(4-(trifluoromethoxy)phenyl)naphthalene-1,4-dione (3j)**

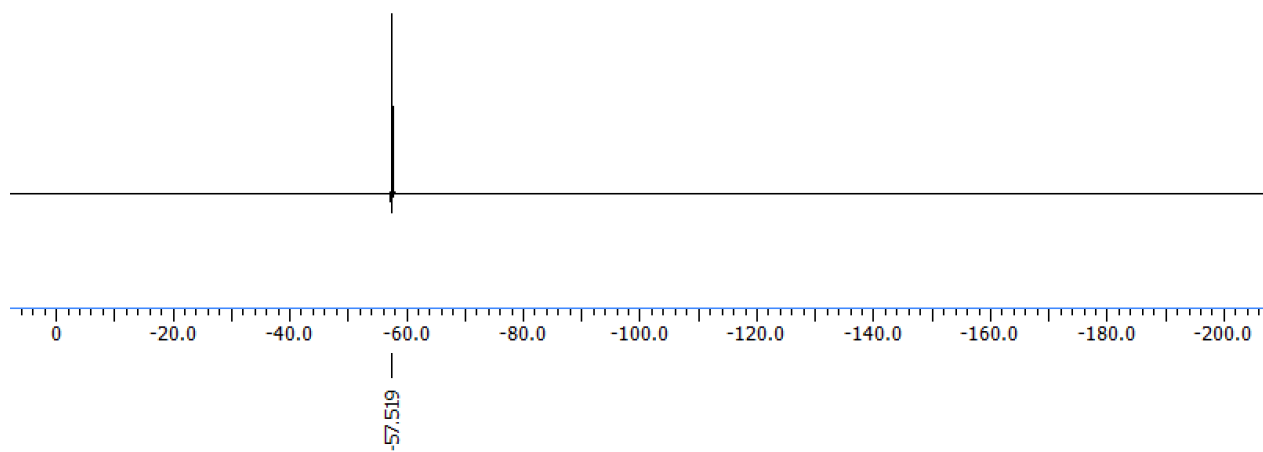

# HRMS

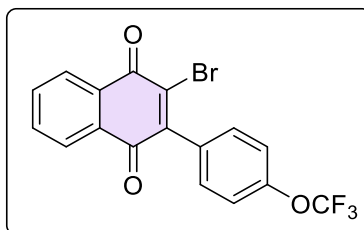

## 2-bromo-3-(4-(trifluoromethoxy)phenyl)naphthalene-1,4-dione (3j)

### Qualitative Compound Report

Data File: MNS-318.d  
Sample Type: Sample  
Instrument Name: Instrument 1  
Acq Method: MS Scan.m  
IRM Calibration Status: Success  
Comment:   
Sample Group: 6200 series TOF/6500 series  
Acquisition SW: Q-TOF 8.05.01 (85125)  
Version:   
Sample Name: MNS-318  
Position: P1-C1  
User Name:   
Acquired Time: 03-03-2025 13:08:58  
DA Method: Default.m  
Info: 3

| Compound Label         | RT    | Mass    | Abund | Formula         | Tgt Mass | Diff (ppm) | MFG Formula     | DB Formula      |
|------------------------|-------|---------|-------|-----------------|----------|------------|-----------------|-----------------|
| Cpd 1: C17 H8 Br F3 O3 | 0.148 | 395.962 | 7226  | C17 H8 Br F3 O3 | 395.9609 | 2.86       | C17 H8 Br F3 O3 | C17 H8 Br F3 O3 |

| Compound Label         | m/z      | RT    | Algorithm       | Mass    |
|------------------------|----------|-------|-----------------|---------|
| Cpd 1: C17 H8 Br F3 O3 | 398.9678 | 0.148 | Find By Formula | 395.962 |

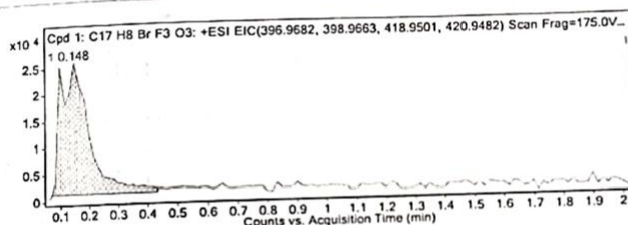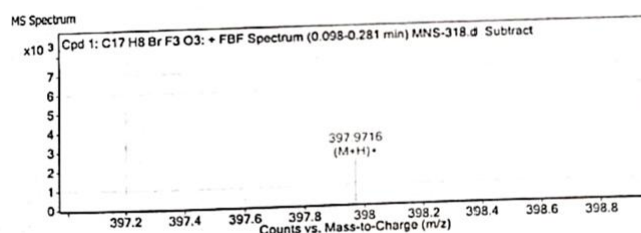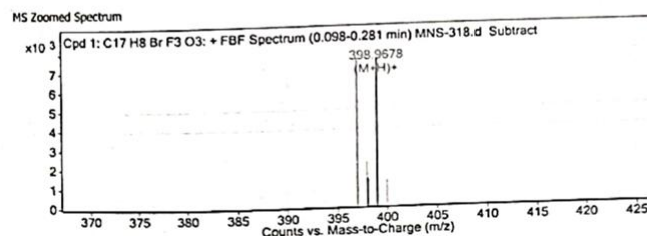

MS Spectrum Peak List

| m/z      | z | Abund   | Formula     | Ion    |
|----------|---|---------|-------------|--------|
| 396.9693 | 1 | 7029.91 | C17H8BrF3O3 | (M+H)+ |
| 397.9716 | 1 | 2301.97 | C17H8BrF3O3 | (M+H)+ |
| 398.9678 | 1 | 7225.93 | C17H8BrF3O3 | (M+H)+ |

--- End Of Report ---

O=[N+]([O-])c1ccc(cc1)C(=O)C(=O)c2ccccc2C=CBr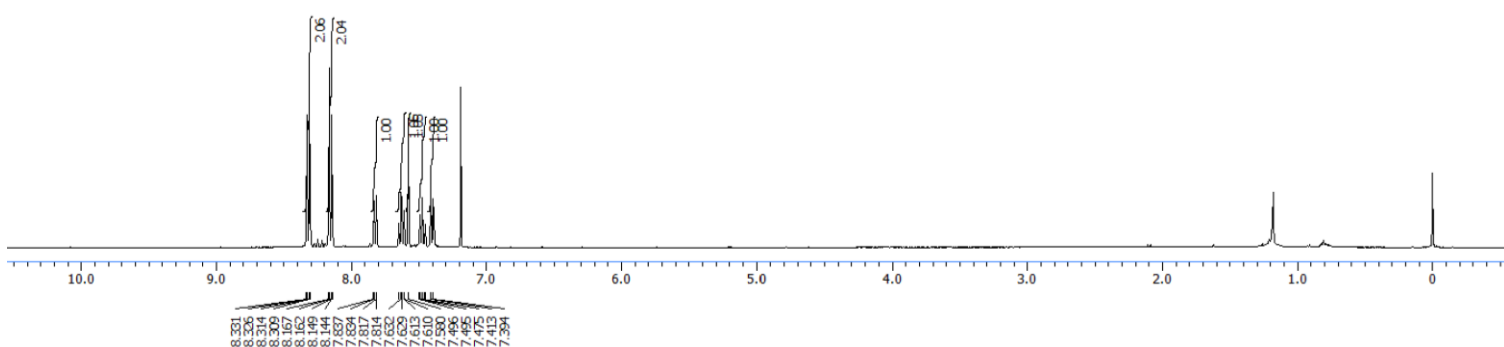

**$^{13}\text{C}$  NMR (100 MHz,  $\text{CDCl}_3$ )**

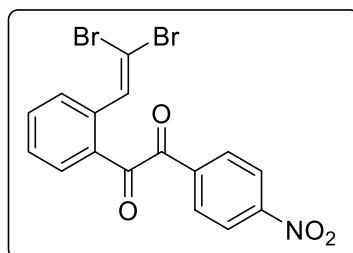

**1-(2-(2,2-dibromovinyl)phenyl)-2-(4-nitrophenyl)ethane-1,2-dione (3k')**

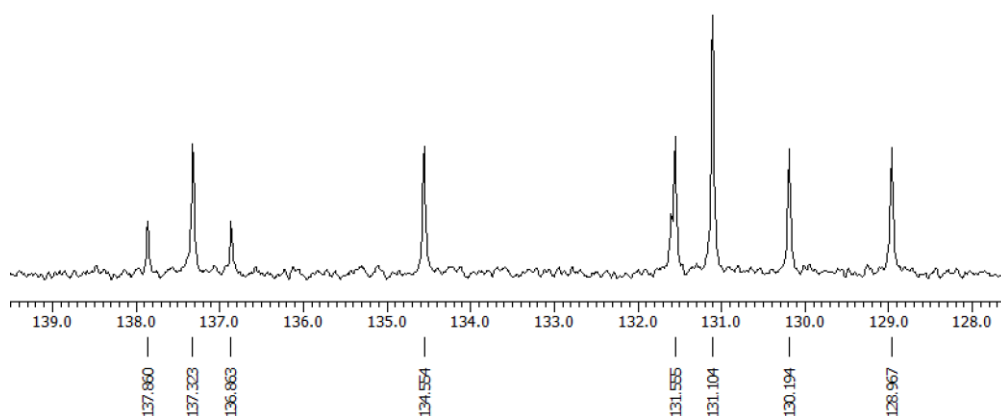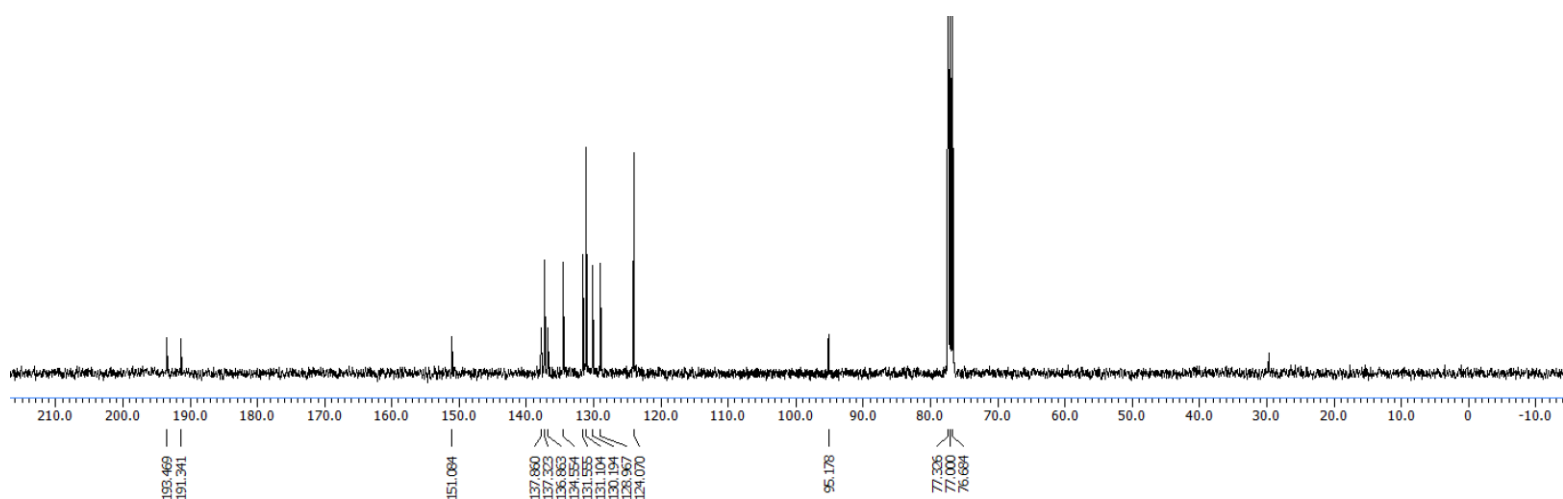



## IR Spectra

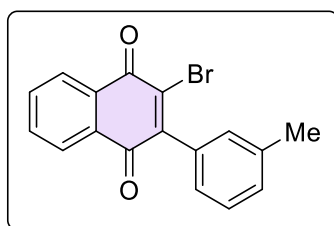

**2-bromo-3-(*m*-tolyl)naphthalene-1,4-dione (3m)**

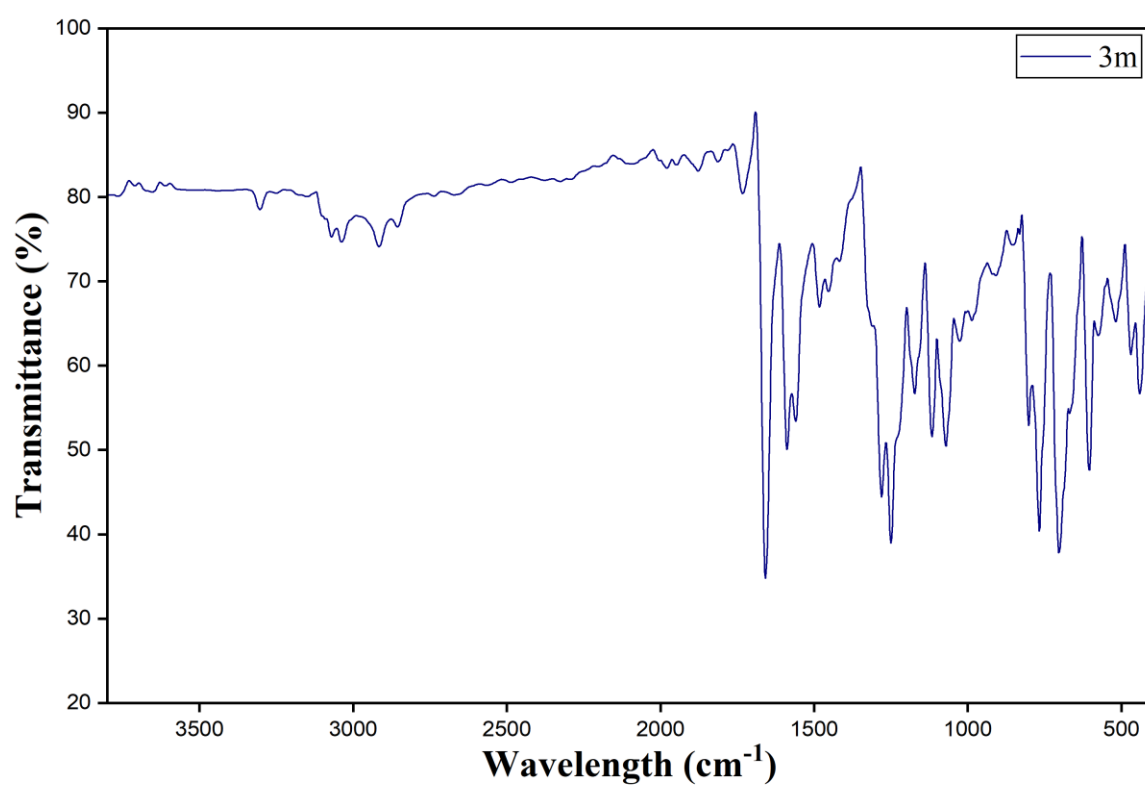

<sup>1</sup>H NMR (400 MHz, CDCl<sub>3</sub>)

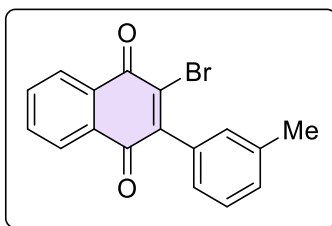

2-bromo-3-(*m*-tolyl)naphthalene-1,4-dione (3m)

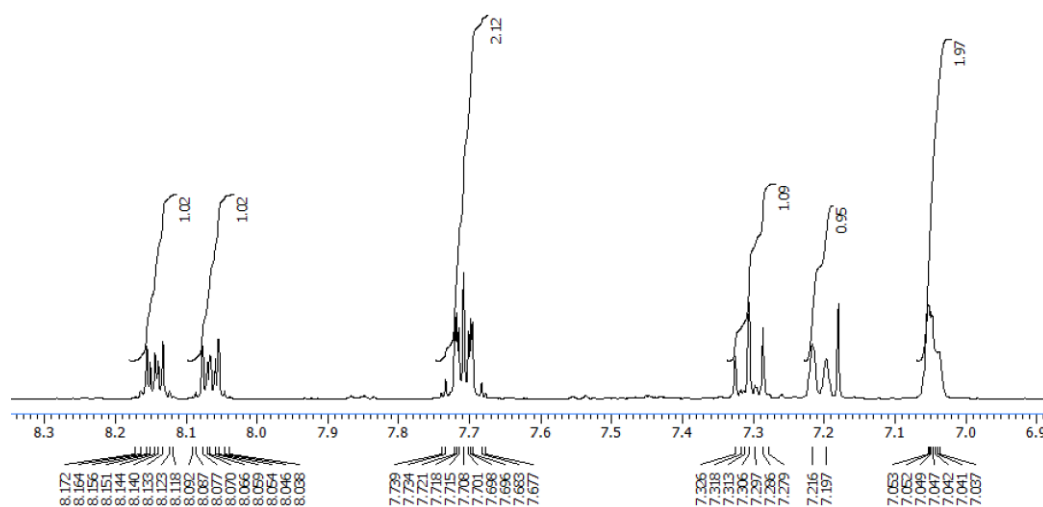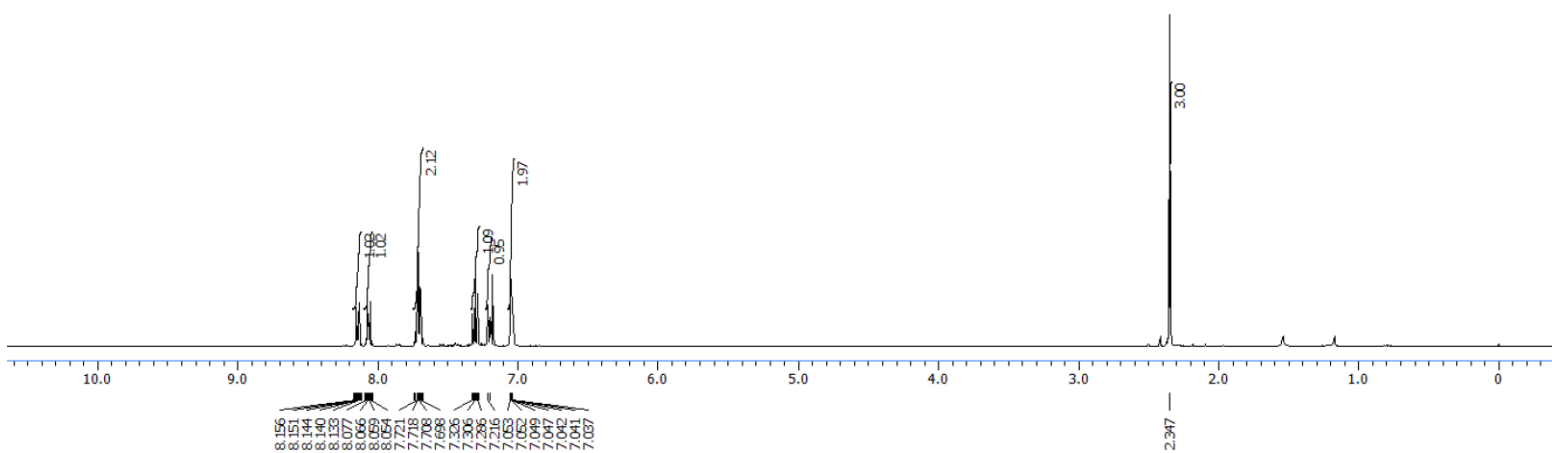

$^{13}\text{C}\{^1\text{H}\}$  NMR (100 MHz,  $\text{CDCl}_3$ )

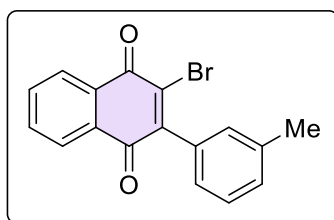

**2-bromo-3-(*m*-tolyl)naphthalene-1,4-dione (3m)**

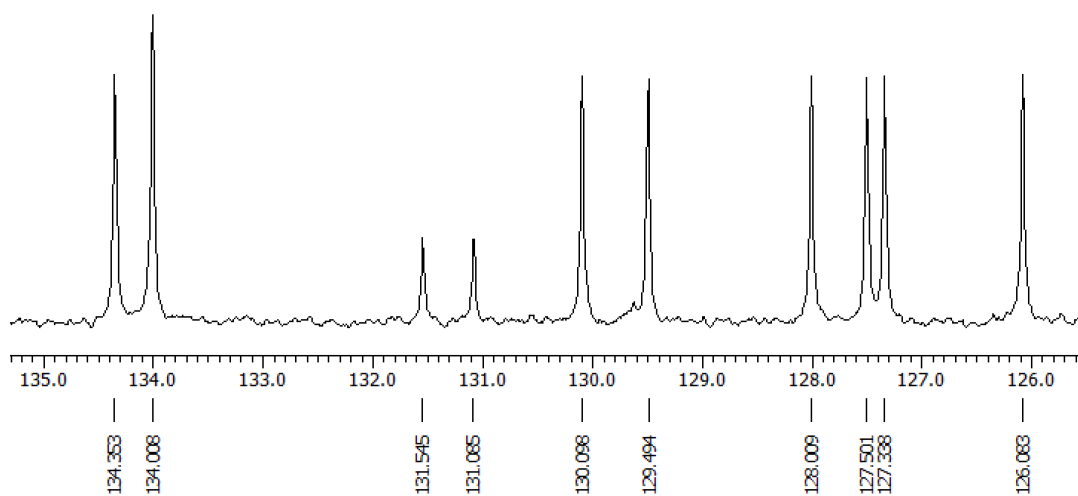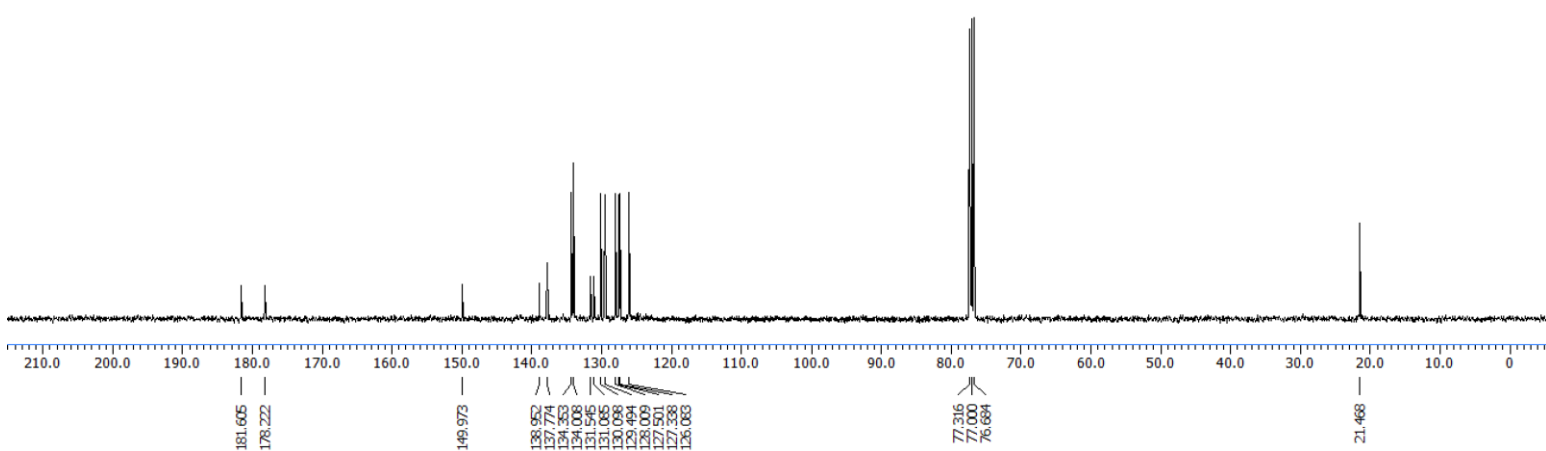

# HRMS

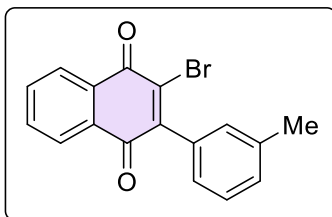

2-bromo-3-(*m*-tolyl)naphthalene-1,4-dione (3m)

## Qualitative Compound Report

Data File: MNS-311.d  
Sample Type: Sample  
Instrument Name: Instrument 1  
Acq Method: MS Scan.m  
IRM Calibration Status: Success  
Comment:

Sample Name: MNS-311  
Position: P1-B1  
User Name:  
Acquired Time: 11-06-2024 13:23:20  
DA Method: Default.m

Sample Group: Info. 3  
Acquisition SW: 6200 series TOF/6500 series  
Version: Q-TOF B.05.01 (B5125)

| Compound Label       | RT    | Mass     | Abund | Formula       | Tgt Mass | Diff (ppm) | MFG Formula   | DB Formula    |
|----------------------|-------|----------|-------|---------------|----------|------------|---------------|---------------|
| Cpd 1: C17 H11 Br O2 | 0.157 | 325.9963 | 20071 | C17 H11 Br O2 | 325.9942 | 6.27       | C17 H11 Br O2 | C17 H11 Br O2 |

| Compound Label       | m/z      | RT    | Algorithm       | Mass     |
|----------------------|----------|-------|-----------------|----------|
| Cpd 1: C17 H11 Br O2 | 327.0035 | 0.157 | Find By Formula | 325.9963 |

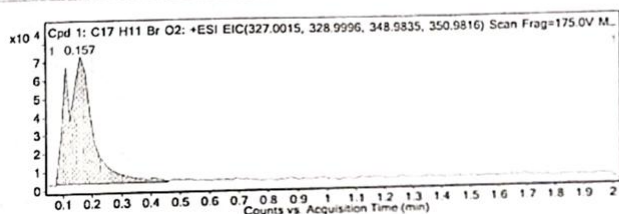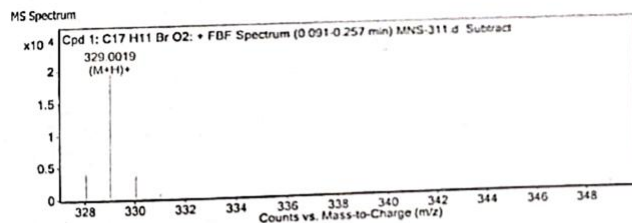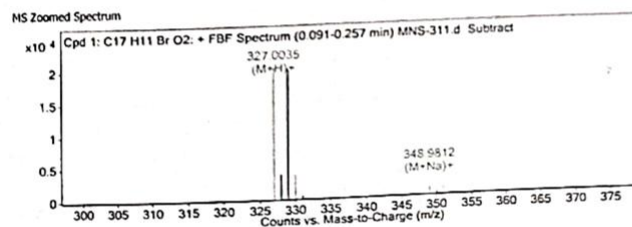

MS Spectrum Peak List

| m/z      | z | Abund    | Formula      | Ion     |
|----------|---|----------|--------------|---------|
| 327.0035 | 1 | 20070.81 | C17H12BrO2   | (M+H)+  |
| 328.0067 | 1 | 3905.27  | C17H12BrO2   | (M+H)+  |
| 329.0019 | 1 | 19387.96 | C17H12BrO2   | (M+H)+  |
| 330.0055 | 1 | 3731.68  | C17H12BrO2   | (M+H)+  |
| 331.0089 | 1 | 899.03   | C17H12BrO2   | (M+H)+  |
| 332.0095 | 1 | 66.73    | C17H12BrO2   | (M+H)+  |
| 348.9812 | 1 | 514.41   | C17H11BrNaO2 | (M+Na)+ |
| 349.9818 | 1 | 284.85   | C17H11BrNaO2 | (M+Na)+ |

--- End Of Report ---

## IR Spectra

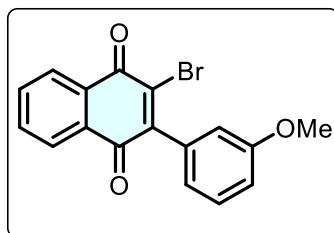

**2-bromo-3-(3-methoxyphenyl)naphthalene-1,4-dione (3n)**

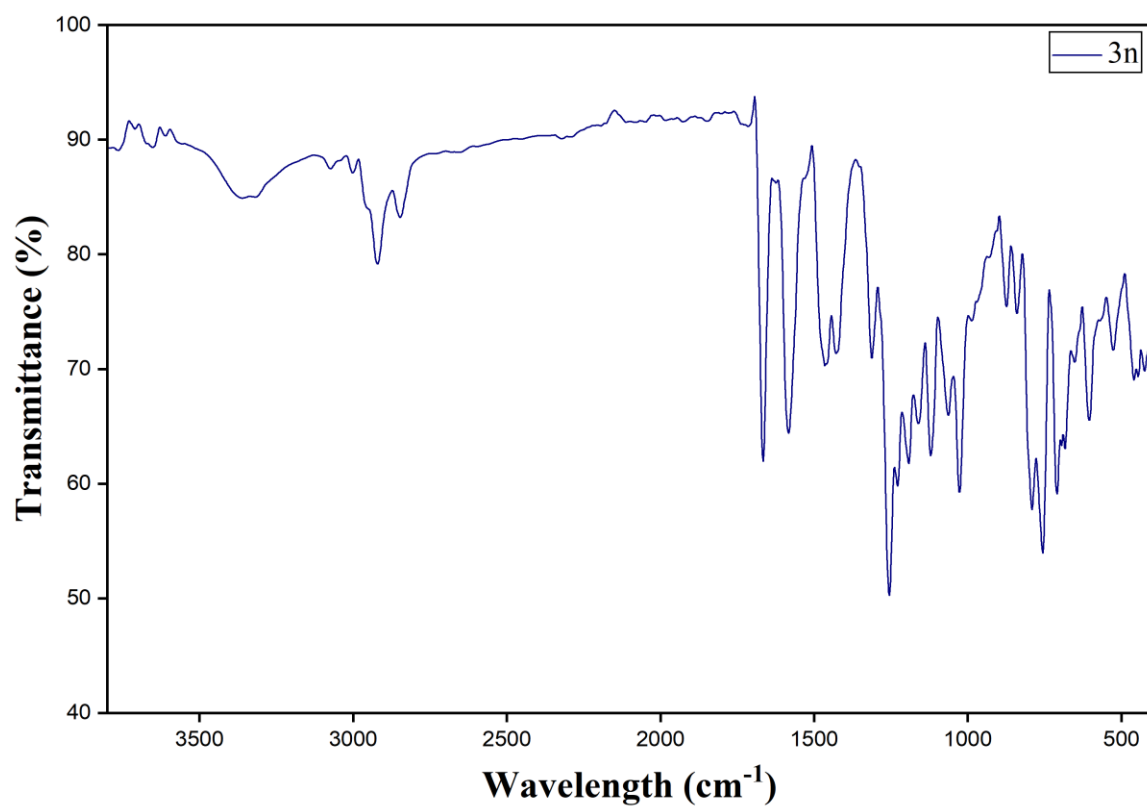

<sup>1</sup>H NMR (400 MHz, CDCl<sub>3</sub>)

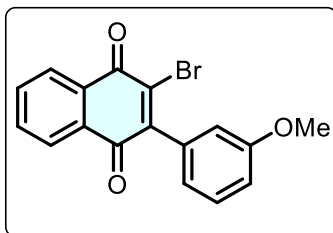

**2-bromo-3-(3-methoxyphenyl)naphthalene-1,4-dione (3n).**

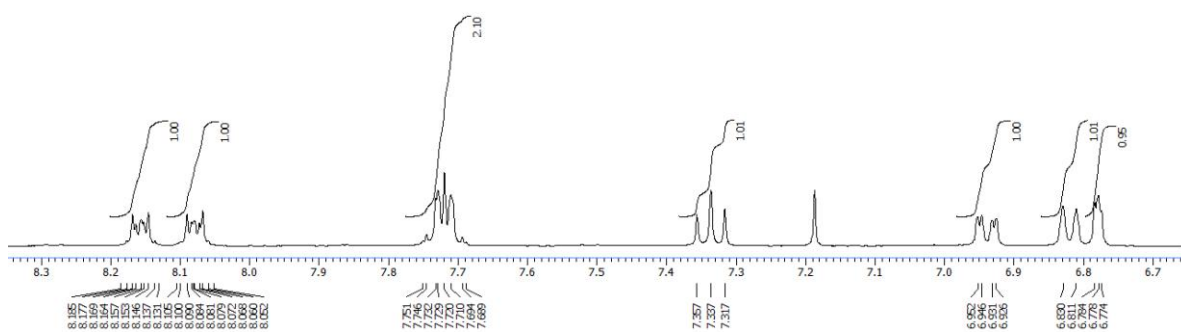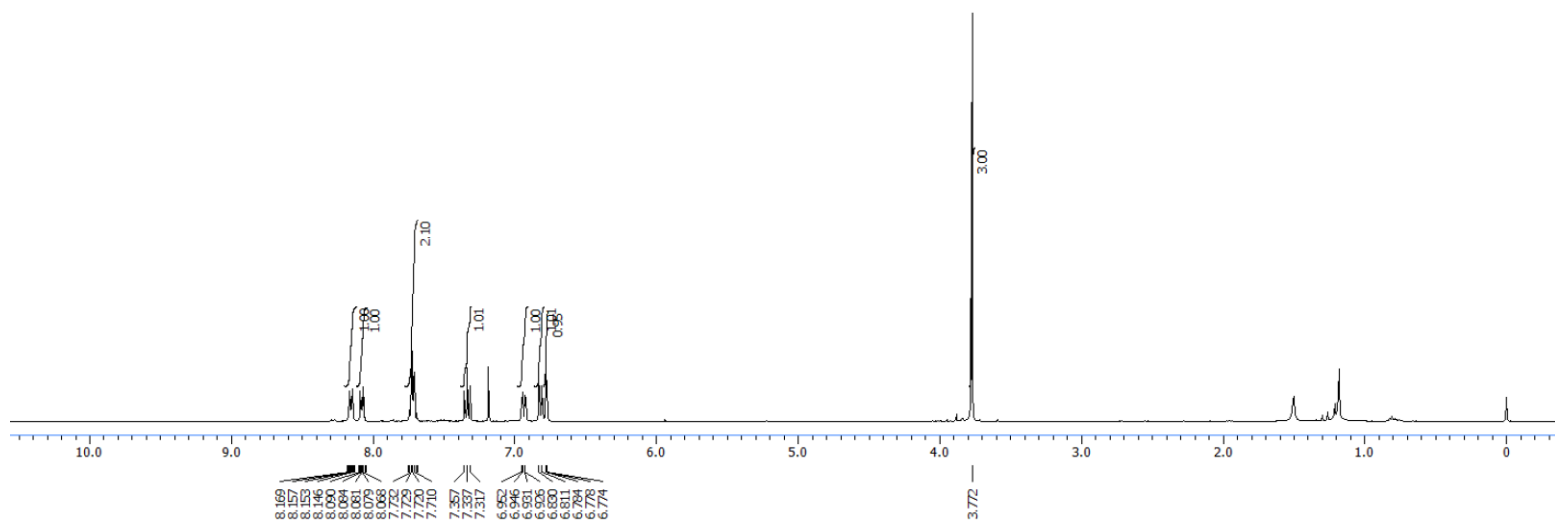

$^{13}\text{C}\{^1\text{H}\}$  NMR (100 MHz,  $\text{CDCl}_3$ )



**2-bromo-3-(3-methoxyphenyl)naphthalene-1,4-dione (3n).**

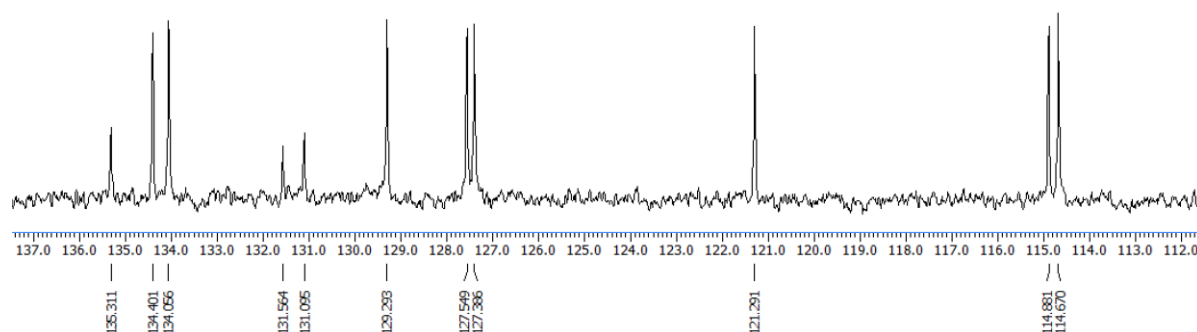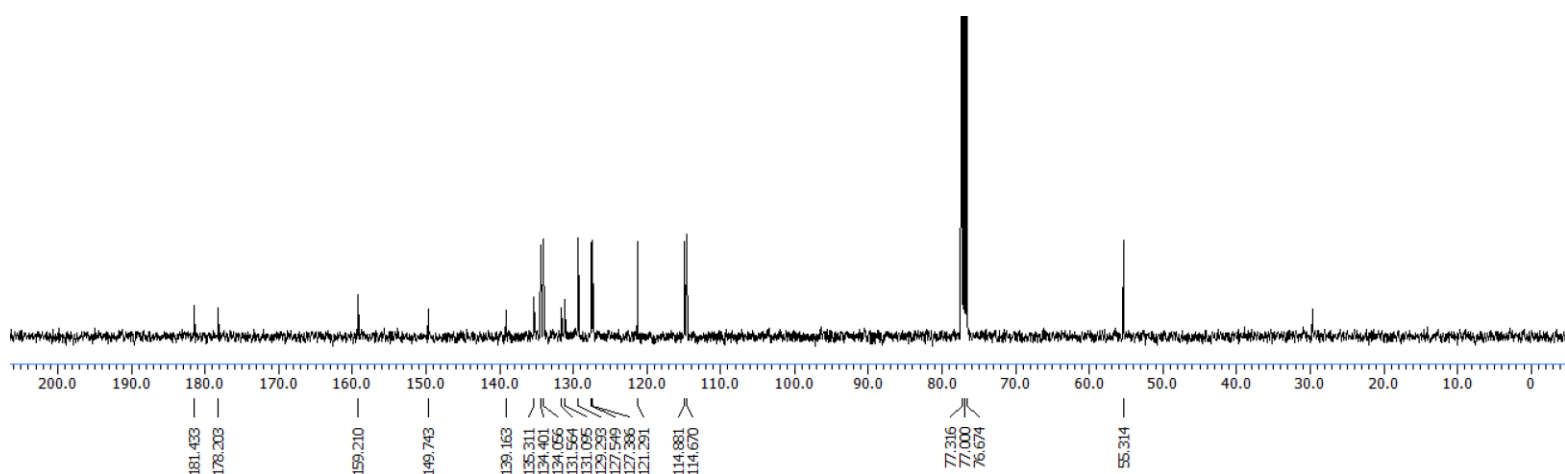

<sup>13</sup>C{<sup>1</sup>H} NMR (100 MHz, CDCl<sub>3</sub>)

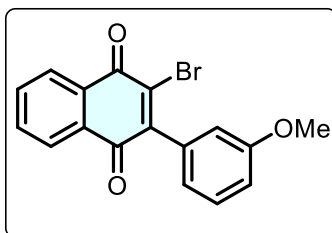

2-bromo-3-(3-methoxyphenyl)naphthalene-1,4-dione (3n).

Qualitative Compound Report

Data File: MNS-300.d  
Sample Type: Sample  
Instrument Name: Instrument 1  
Acq Method: MS Scan.m  
IRM Calibration Status: Success  
Comment:  
Sample Group: Info. 3  
Acquisition SW: 6200 series TOF/6500 series  
Version: Q-TOF 8.05.01 (B5125)  
Sample Name: MNS-300  
Position: P1-A3  
User Name:  
Acquired Time: 13-05-2024 14:16:22  
DA Method: Default.m

| Compound Label       | RT    | Mass    | Abund  | Formula       | Tgt Mass | Diff (ppm) | MFG Formula   | DB Formula    |
|----------------------|-------|---------|--------|---------------|----------|------------|---------------|---------------|
| Cpd 1: C17 H11 Br O3 | 0.158 | 341.991 | 106321 | C17 H11 Br O3 | 341.992  | 5.44       | C17 H11 Br O3 | C17 H11 Br O3 |

| Compound Label       | m/z      | RT    | Algorithm       | Mass    |
|----------------------|----------|-------|-----------------|---------|
| Cpd 1: C17 H11 Br O3 | 342.9982 | 0.158 | Find By Formula | 341.991 |

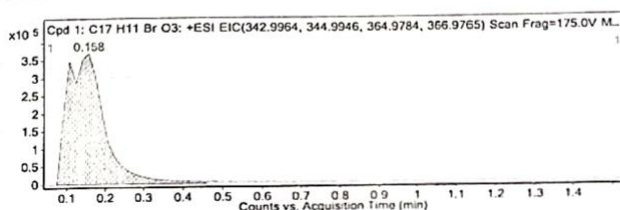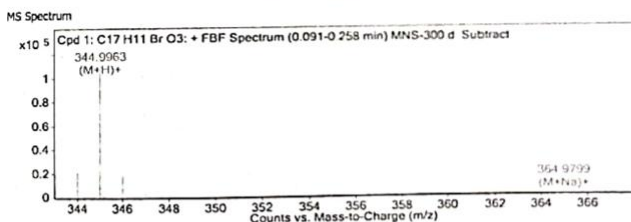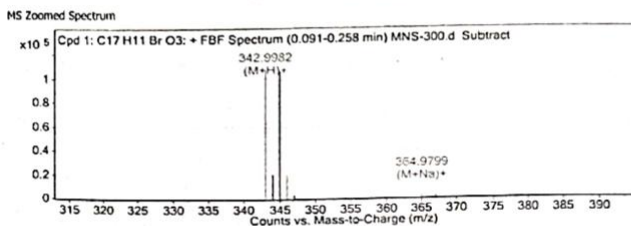

| m/z      | z | Abund     | Formula      | Ion     |
|----------|---|-----------|--------------|---------|
| 342.9982 | 1 | 106321.27 | C17H11BrO3   | (M+H)+  |
| 344.0027 | 1 | 21468.66  | C17H11BrO3   | (M+H)+  |
| 344.9963 | 1 | 105363.95 | C17H11BrO3   | (M+H)+  |
| 345.9996 | 1 | 18958.19  | C17H11BrO3   | (M+H)+  |
| 347.0031 | 1 | 2561.77   | C17H11BrO3   | (M+H)+  |
| 348.0029 | 1 | 187.86    | C17H11BrO3   | (M+H)+  |
| 364.9799 | 1 | 1568.85   | C17H11BrNaO3 | (M+Na)+ |
| 365.9823 | 1 | 326.81    | C17H11BrNaO3 | (M+Na)+ |
| 366.9781 | 1 | 1550.11   | C17H11BrNaO3 | (M+Na)+ |
| 367.9867 | 1 | 314.61    | C17H11BrNaO3 | (M+Na)+ |



## IR Spectra

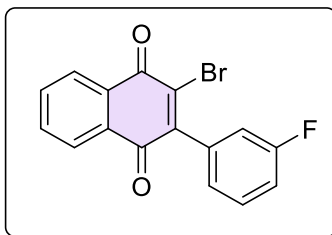

**2-bromo-3-(3-fluorophenyl)naphthalene-1,4-dione (3o)**

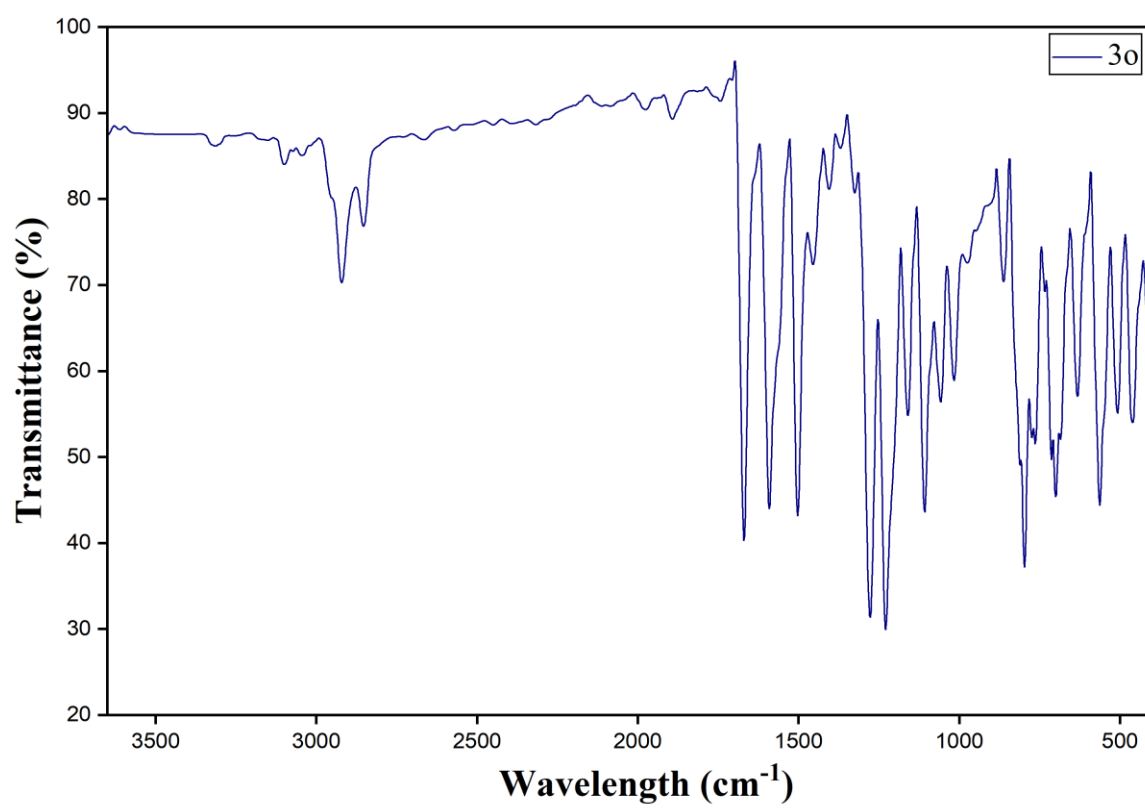

<sup>1</sup>H NMR (400 MHz, CDCl<sub>3</sub>)

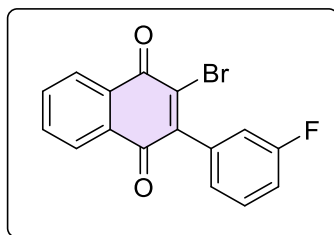

**2-bromo-3-(3-fluorophenyl)naphthalene-1,4-dione (3o)**

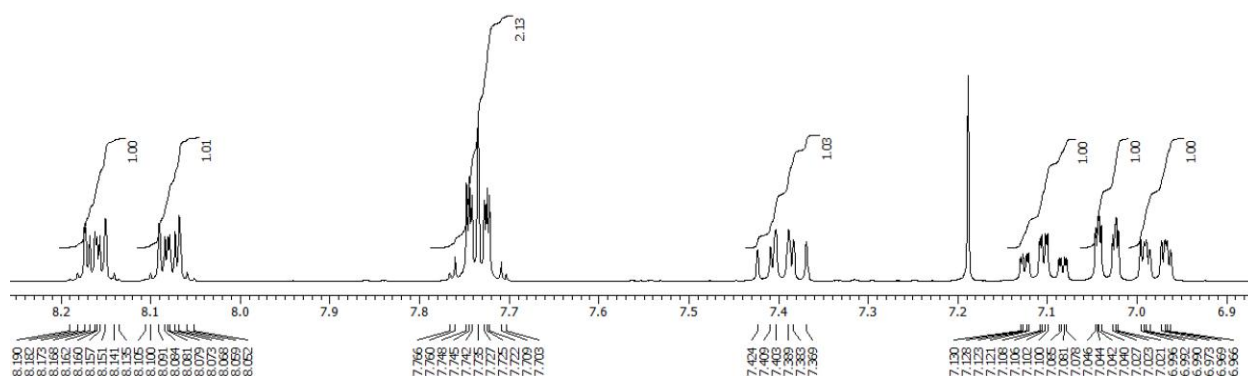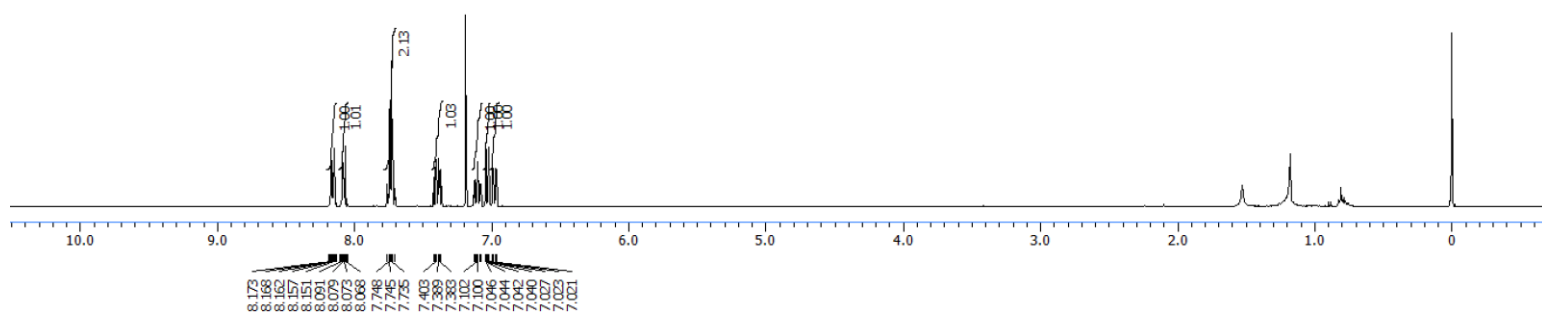

$^{13}\text{C}\{^1\text{H}\}$  NMR (100 MHz,  $\text{CDCl}_3$ )

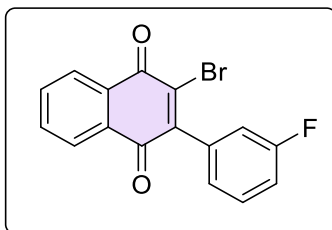

**2-bromo-3-(3-fluorophenyl)naphthalene-1,4-dione (3o)**

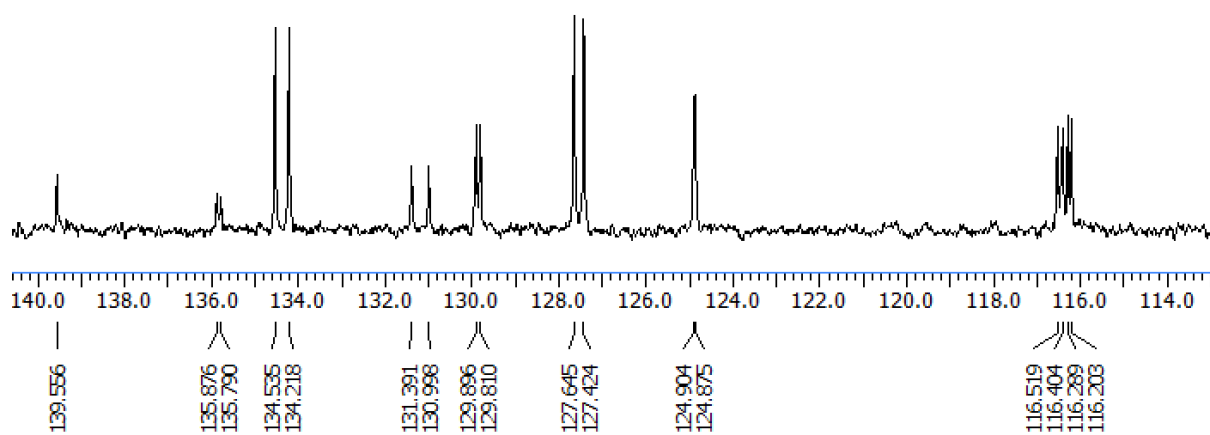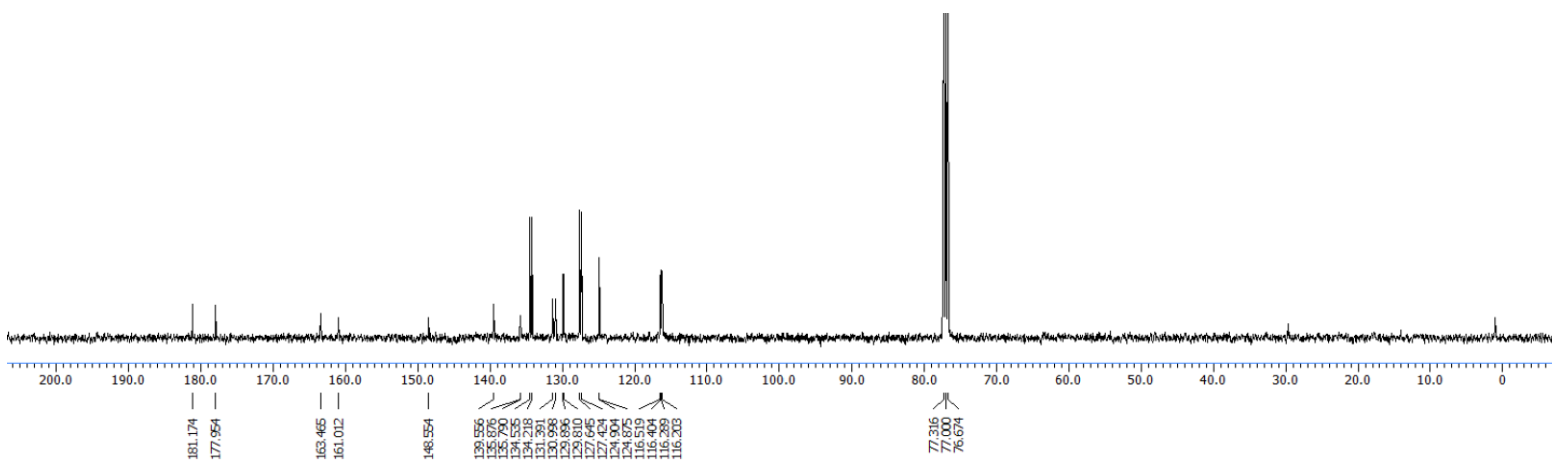

**$^{19}\text{F}$  NMR (376 MHz,  $\text{CDCl}_3$ )**

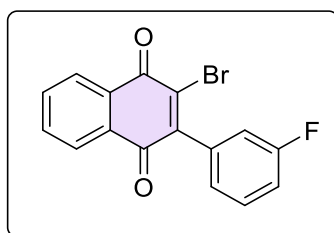

**2-bromo-3-(3-fluorophenyl)naphthalene-1,4-dione (3o)**

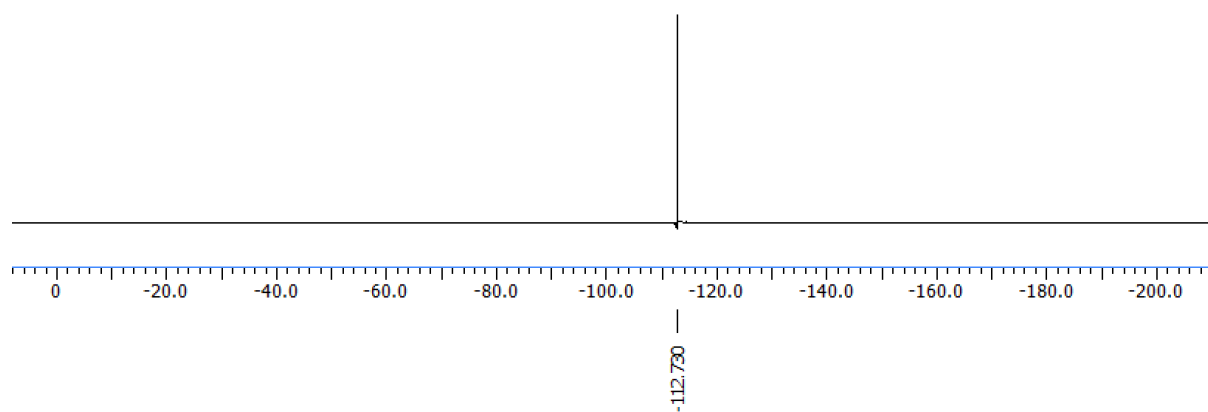

# HRMS

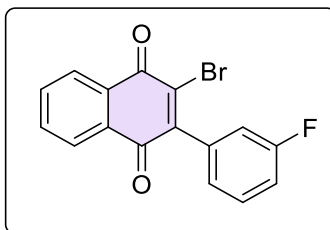

## 2-bromo-3-(3-fluorophenyl)naphthalene-1,4-dione (3o)

### Qualitative Compound Report

Data File: MNS-302.d  
Sample Type: Sample  
Instrument Name: Instrument 1  
Acq Method: MS Scan.m  
IRM Calibration Status: Success  
Comment:   
Sample Name: MNS-302  
Position: P1-A4  
User Name:   
Acquired Time: 13-05-2024 14:20:15  
DA Method: Default.m

Sample Group: Info. 3  
Acquisition SW: 6200 series TOF/6500 series  
Version: Q-TOF B.05.01 (B5125)

#### Compound Table

| Compound Label        | RT    | Mass     | Abund | Formula        | Tgt Mass | Diff (ppm) | MFG Formula    | DB Formula     |
|-----------------------|-------|----------|-------|----------------|----------|------------|----------------|----------------|
| Cpd 1: C16 H8 Br F O2 | 0.102 | 329.9712 | 8767  | C16 H8 Br F O2 | 329.9692 | 6.09       | C16 H8 Br F O2 | C16 H8 Br F O2 |

| Compound Label        | m/z      | RT    | Algorithm       | Mass     |
|-----------------------|----------|-------|-----------------|----------|
| Cpd 1: C16 H8 Br F O2 | 332.9763 | 0.102 | Find By Formula | 329.9712 |

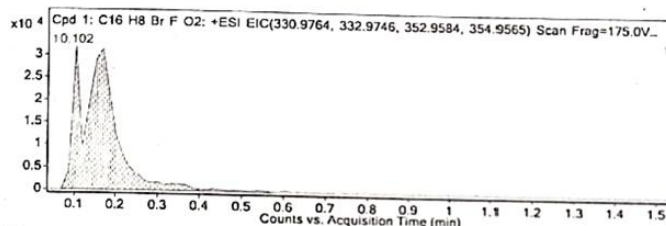

#### MS Spectrum

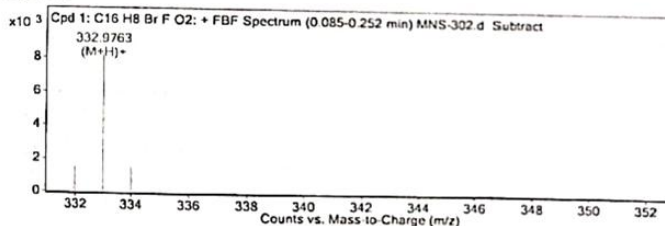

#### MS Zoomed Spectrum

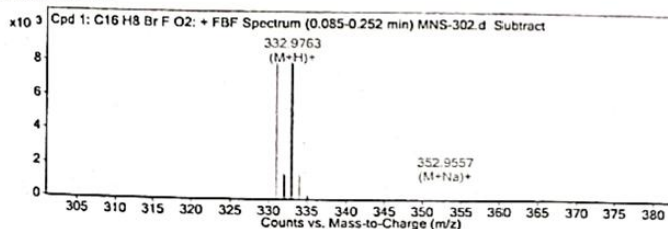

#### MS Spectrum Peak List

| m/z      | z | Abund   | Formula      | Ion     |
|----------|---|---------|--------------|---------|
| 330.9785 | 1 | 7443.49 | C16H8BrFO2   | (M+H)+  |
| 331.9829 | 1 | 1502.41 | C16H8BrFO2   | (M+H)+  |
| 332.9763 | 1 | 8267.29 | C16H8BrFO2   | (M+H)+  |
| 333.9802 | 1 | 1465.49 | C16H8BrFO2   | (M+H)+  |
| 334.9861 | 1 | 220.44  | C16H8BrFO2   | (M+H)+  |
| 352.9557 | 1 | 61.64   | C16H8BrFNaO2 | (M+Na)+ |

--- End Of Report ---

## IR Spectra

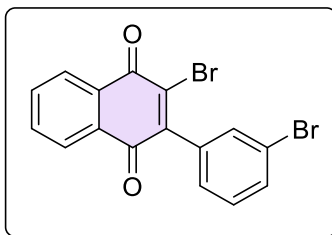

**2-bromo-3-(3-bromophenyl)naphthalene-1,4-dione (3p)**

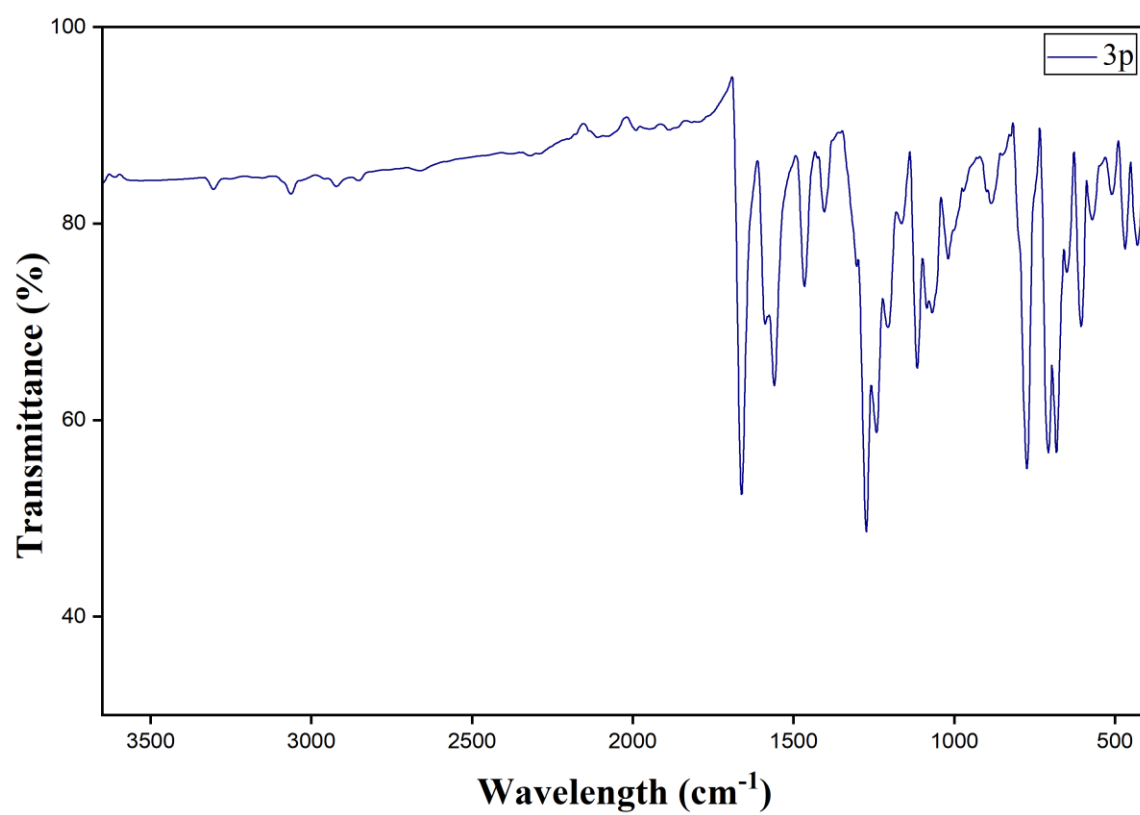

<sup>1</sup>H NMR (400 MHz, CDCl<sub>3</sub>)

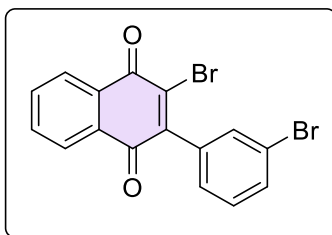

**2-bromo-3-(3-bromophenyl)naphthalene-1,4-dione (3p)**

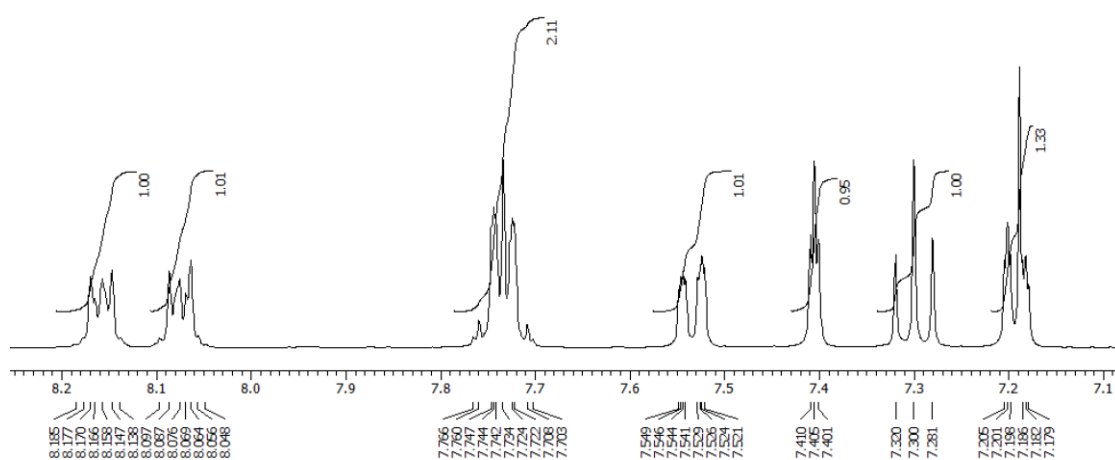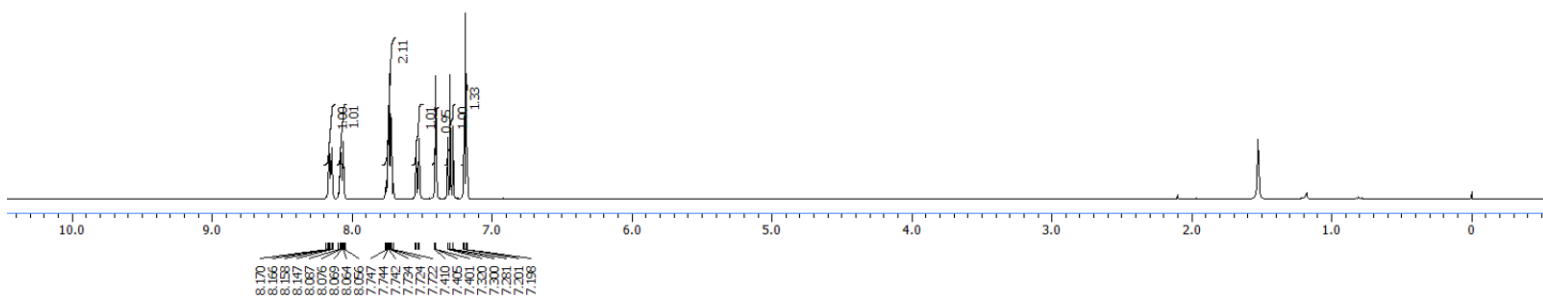

$^{13}\text{C}\{^1\text{H}\}$  NMR (100 MHz,  $\text{CDCl}_3$ )

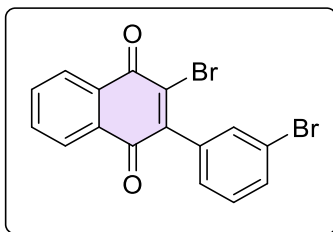

**2-bromo-3-(3-bromophenyl)naphthalene-1,4-dione (3p)**

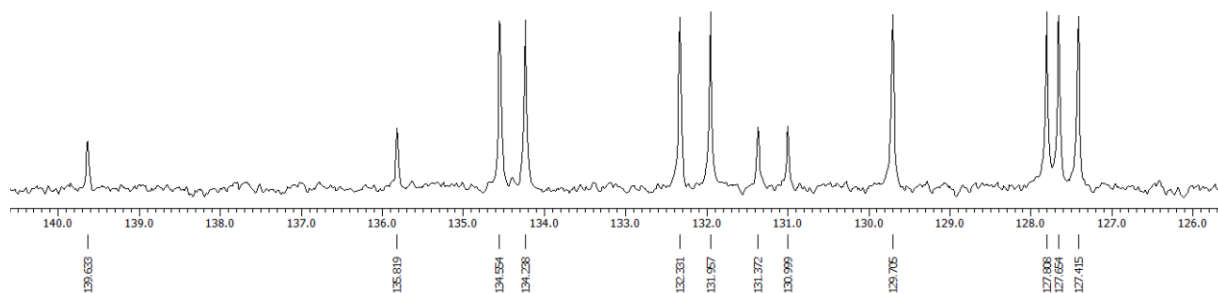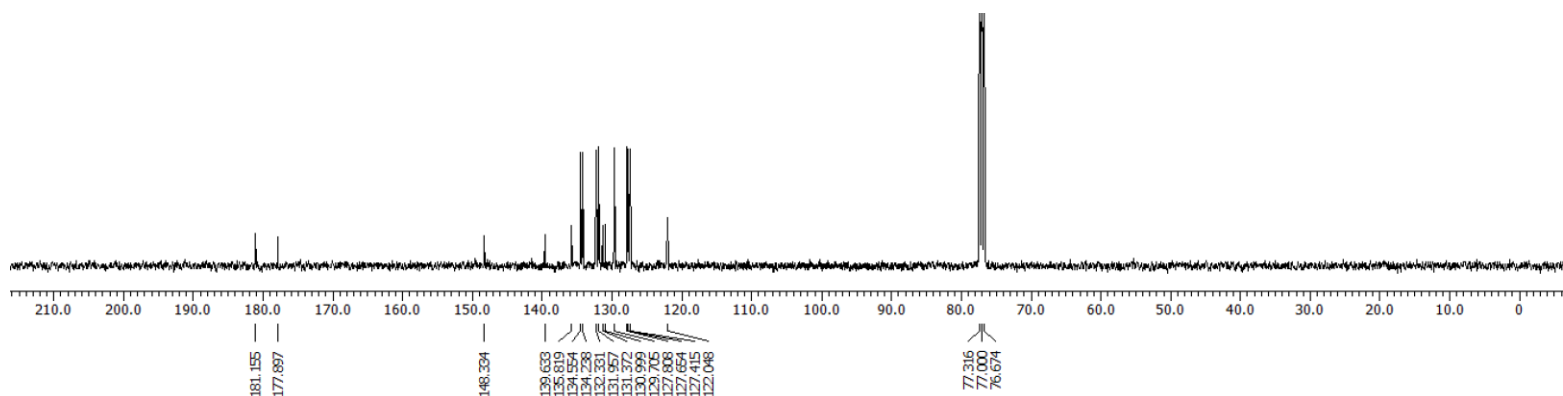



$^{13}\text{C}\{^1\text{H}\}$  NMR (100 MHz,  $\text{CDCl}_3$ )

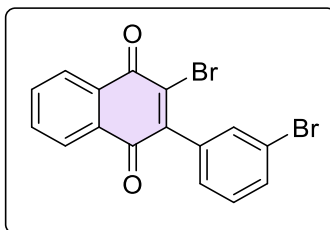

2-bromo-3-(3-bromophenyl)naphthalene-1,4-dione (3p)

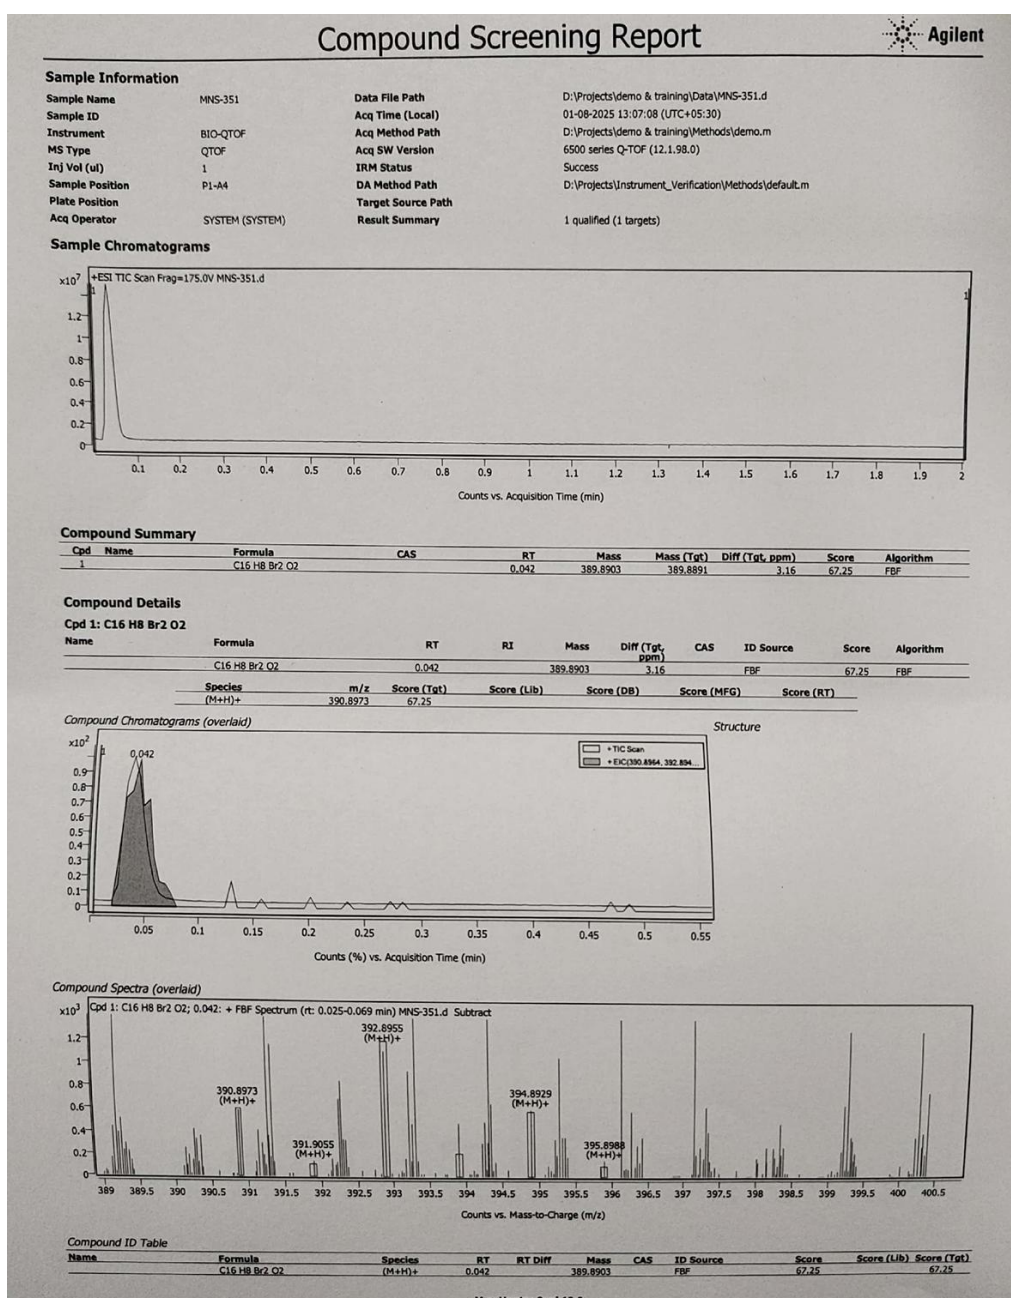

## IR Spectra

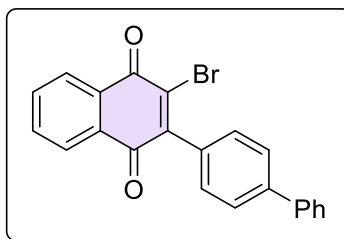

**2-([1,1'-biphenyl]-4-yl)-3-bromonaphthalene-1,4-dione (3q)**

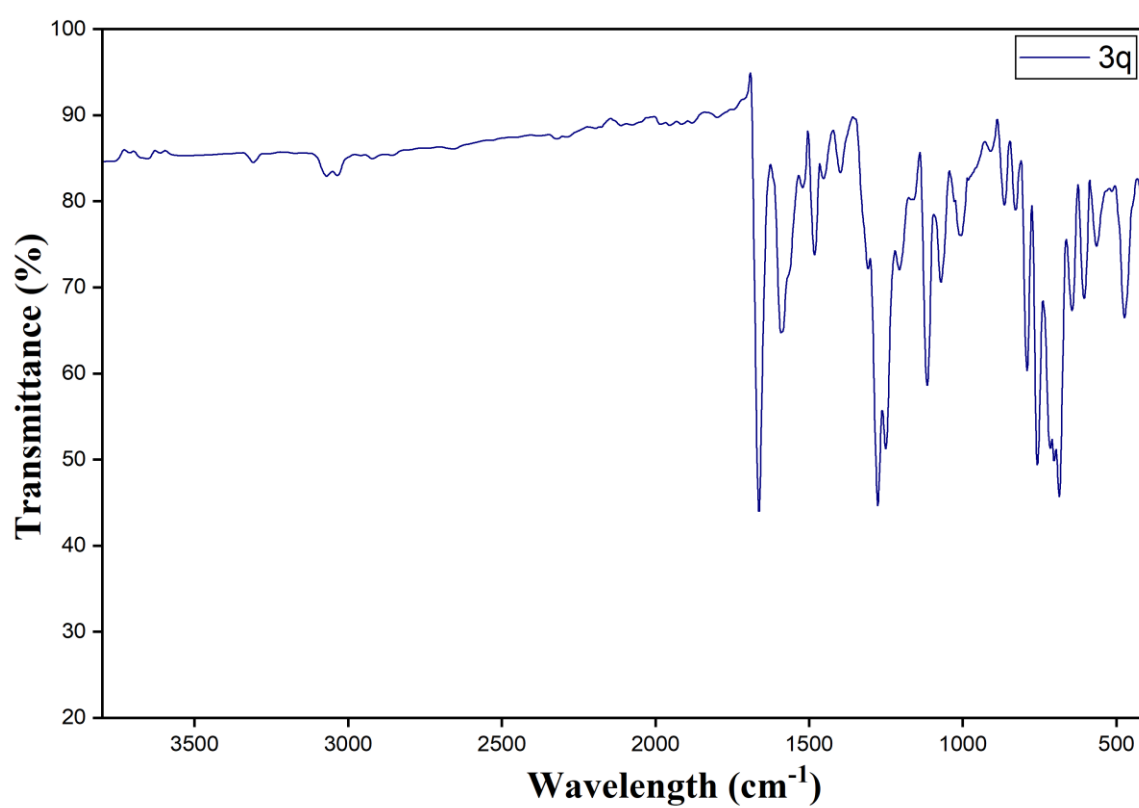

**$^1\text{H}$  NMR (400 MHz,  $\text{CDCl}_3$ )**

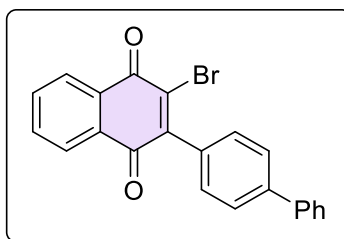

**2-([1,1'-biphenyl]-4-yl)-3-bromonaphthalene-1,4-dione (3q)**

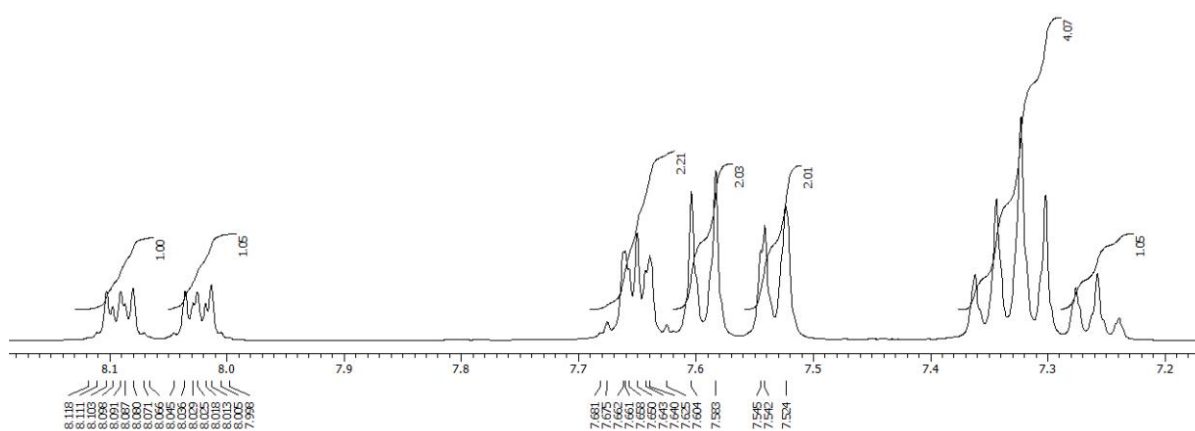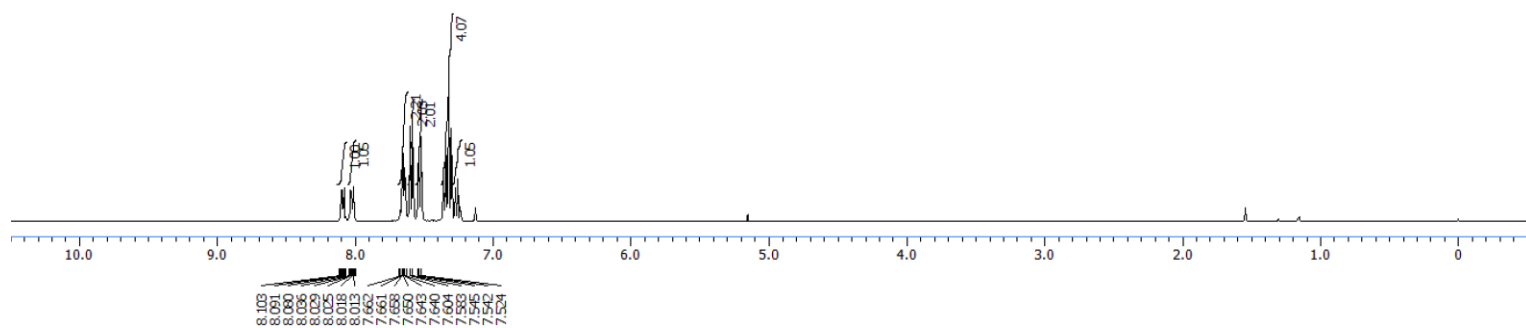

$^{13}\text{C}\{^1\text{H}\}$  NMR (100 MHz,  $\text{CDCl}_3$ )

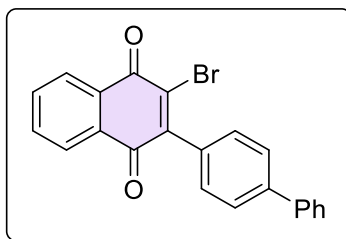

2-([1,1'-biphenyl]-4-yl)-3-bromonaphthalene-1,4-dione (3q)

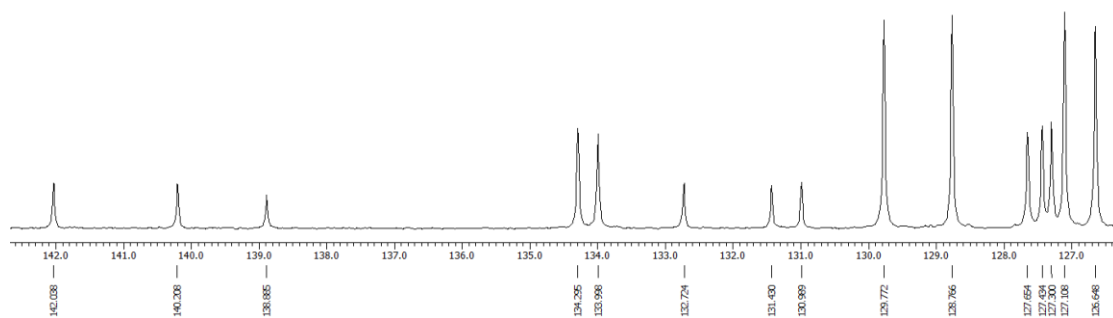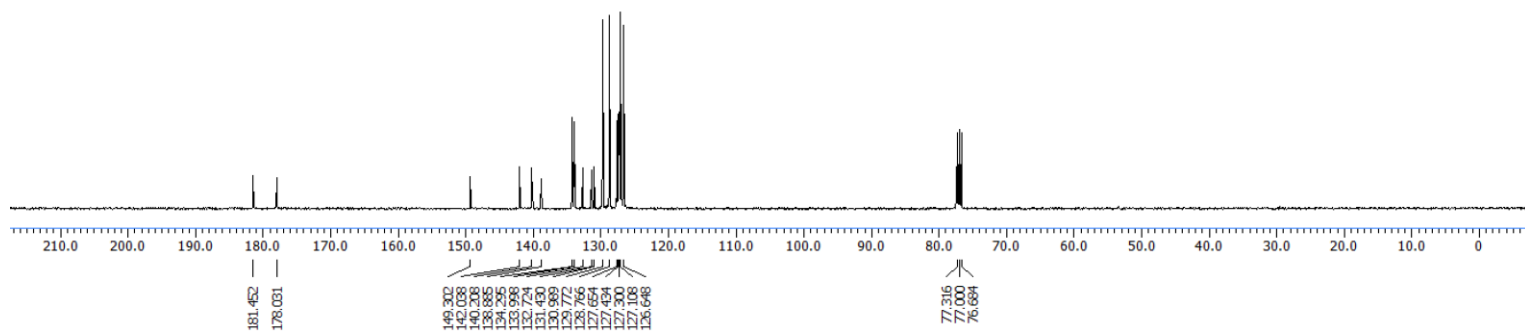

# HRMS

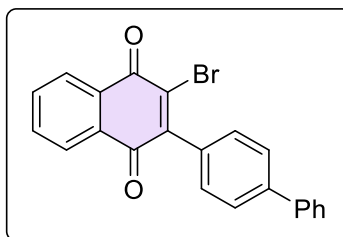

2-([1,1'-biphenyl]-4-yl)-3-bromonaphthalene-1,4-dione (3q)

## Qualitative Compound Report

Data File: MNS-350.d  
Sample Type: Sample  
Instrument Name: Instrument 1  
Acq Method: MS Scan.m  
IRM Calibration Status: Success  
Comment:  
Sample Group: Info. 3  
Acquisition SW: 6200 series TOF/6500 series  
Version: Q-TOF 8.05.01 (85125)

Sample Name: MNS-350  
Position: P1-03  
User Name:  
Acquired Time: 20-03-2025 15:00:01  
DA Method: Default.m

| Compound Label       | RT    | Mass     | Abund | Formula       | Tgt Mass | Diff (ppm) | MFG Formula   | DB Formula    |
|----------------------|-------|----------|-------|---------------|----------|------------|---------------|---------------|
| Cpd 1: C22 H13 Br O2 | 0.199 | 388.0101 | 20466 | C22 H13 Br O2 | 388.0099 | 0.62       | C22 H13 Br O2 | C22 H13 Br O2 |

| Compound Label       | m/z      | RT    | Algorithm       | Mass     |
|----------------------|----------|-------|-----------------|----------|
| Cpd 1: C22 H13 Br O2 | 391.0156 | 0.199 | Find By Formula | 388.0101 |

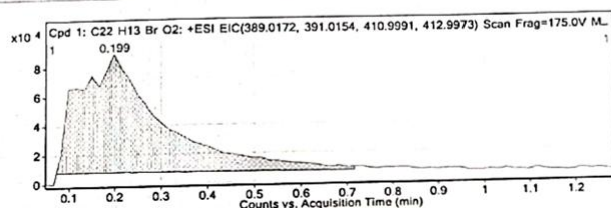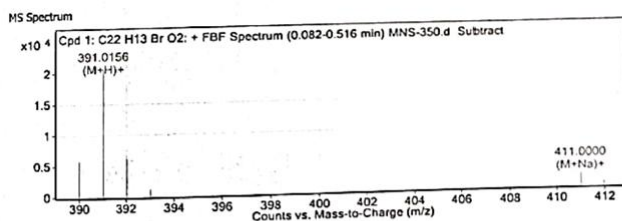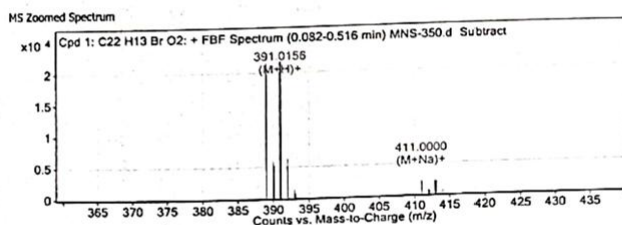

MS Spectrum Peak List

| m/z      | z | Abund    | Formula      | Ion     |
|----------|---|----------|--------------|---------|
| 389.0171 | 1 | 20287.09 | C22H14BrO2   | (M+H)+  |
| 390.022  | 1 | 5892.73  | C22H14BrO2   | (M+H)+  |
| 391.0156 | 1 | 20466.24 | C22H14BrO2   | (M+H)+  |
| 392.0194 | 1 | 6250.45  | C22H14BrO2   | (M+H)+  |
| 393.0283 | 1 | 1262.03  | C22H14BrO2   | (M+H)+  |
| 411      | 1 | 2201.55  | C22H13BrNaO2 | (M+Na)+ |
| 411.9876 | 1 | 696.08   | C22H13BrNaO2 | (M+Na)+ |
| 412.9958 | 1 | 1644.31  | C22H13BrNaO2 | (M+Na)+ |

— End Of Report —

## IR Spectra

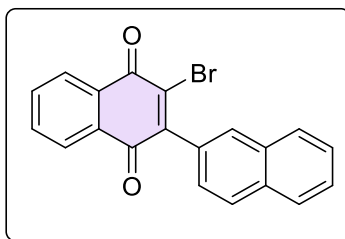

**3-bromo-[2,2'-binaphthalene]-1,4-dione (3r)**

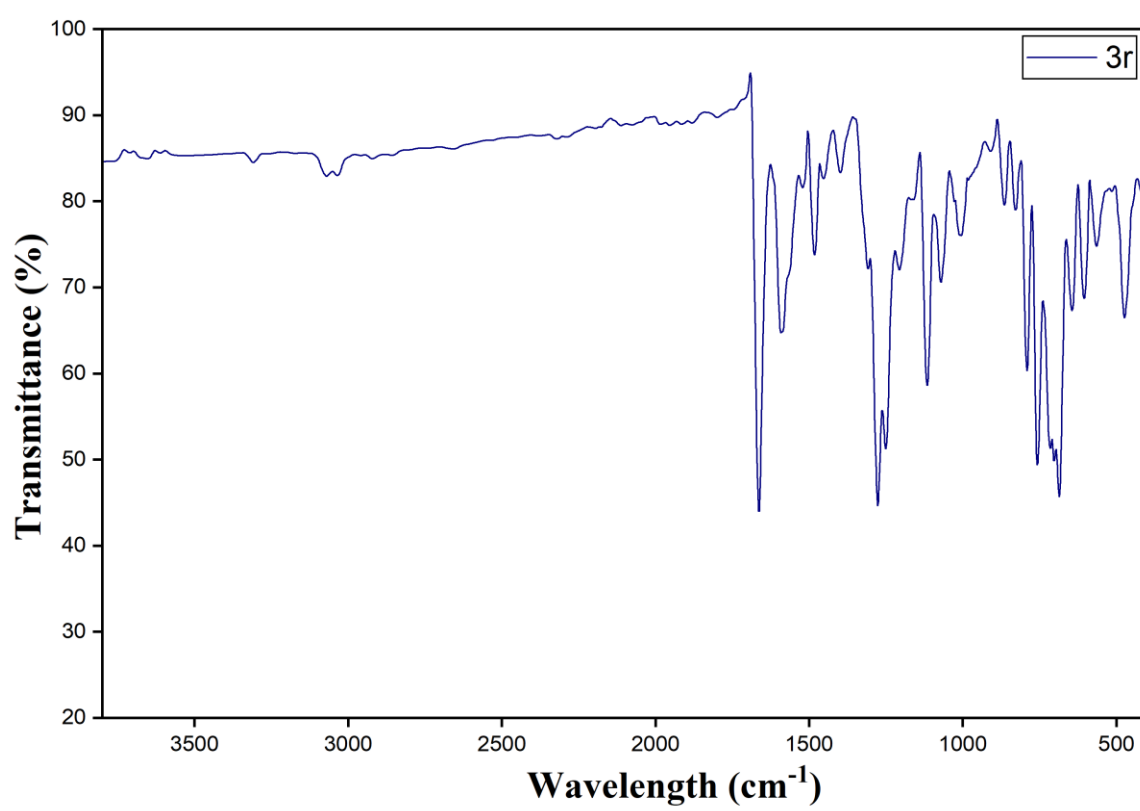

<sup>1</sup>H NMR (400 MHz, CDCl<sub>3</sub>)

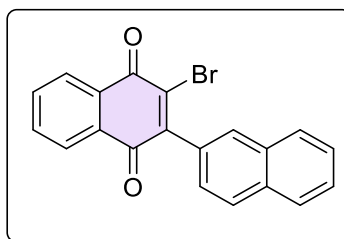

3-bromo-[2,2'-binaphthalene]-1,4-dione (3r)

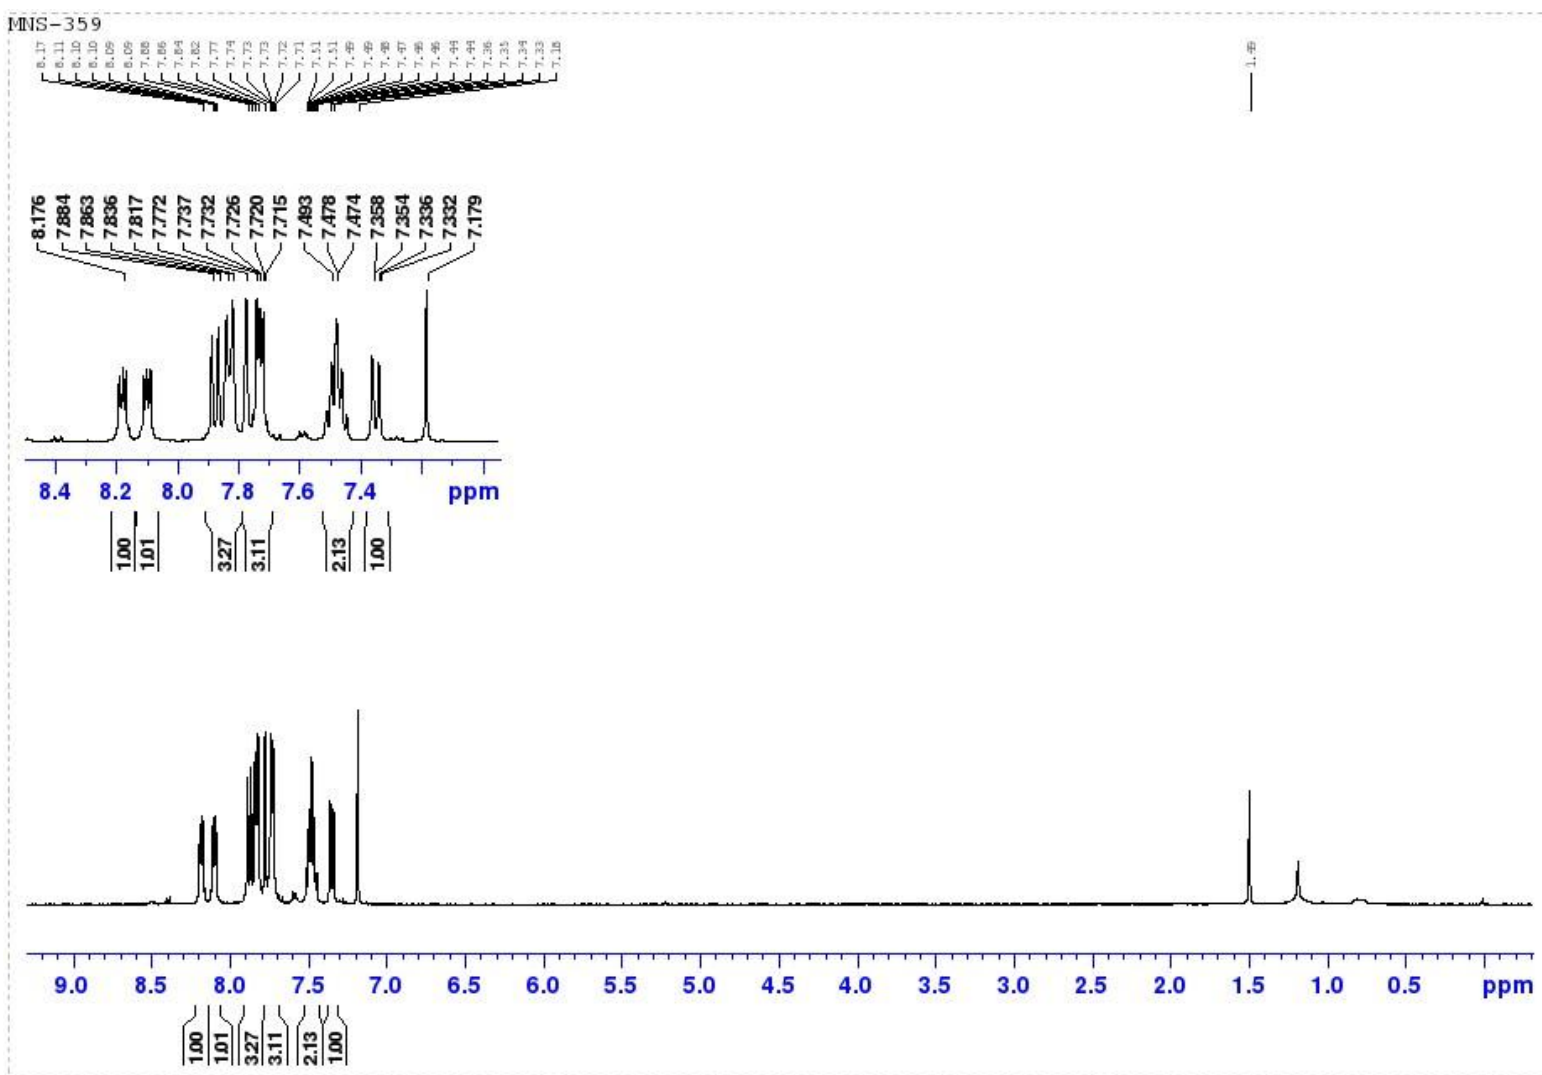

$^{13}\text{C}\{^1\text{H}\}$  NMR (100 MHz,  $\text{CDCl}_3$ )

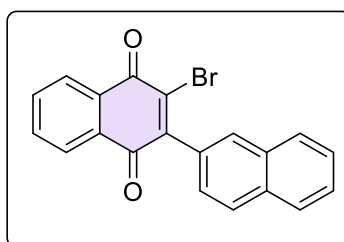

**3-bromo-[2,2'-binaphthalene]-1,4-dione (3r)**

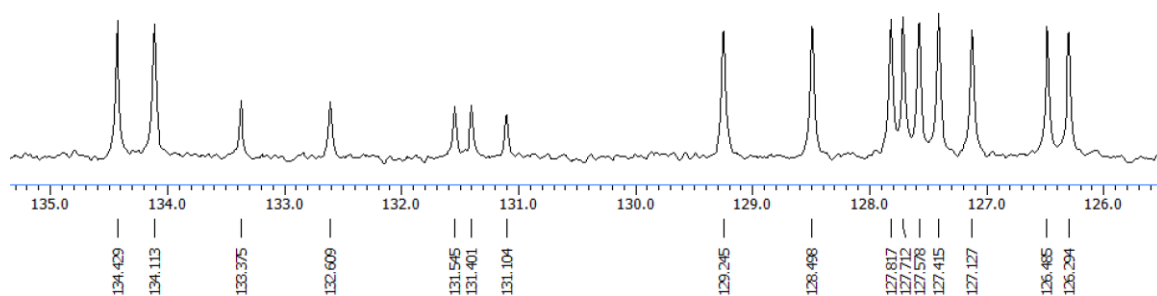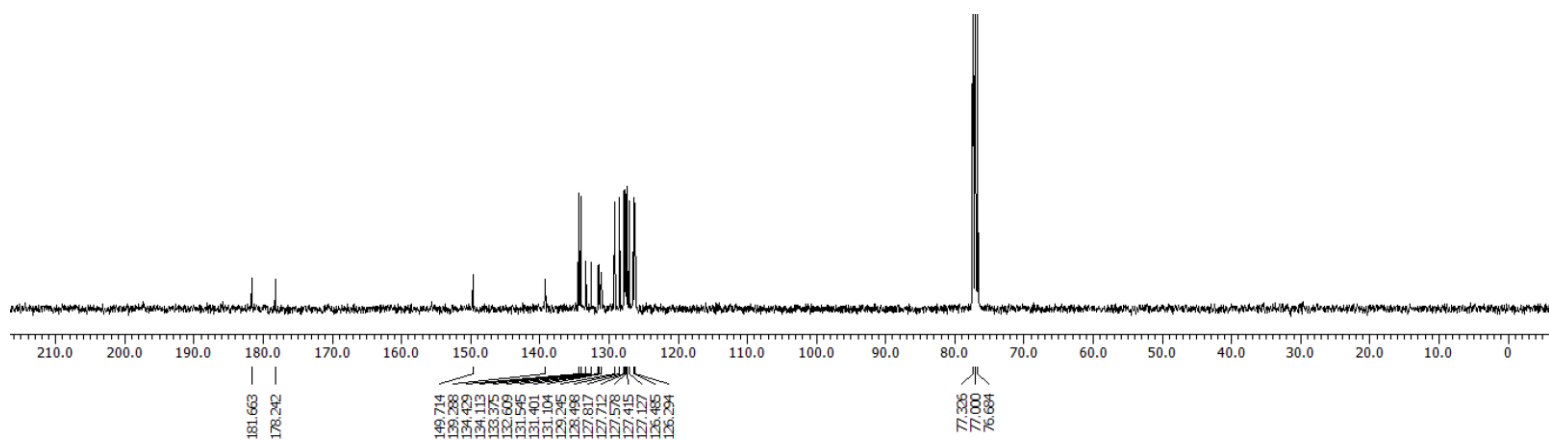



## IR Spectra

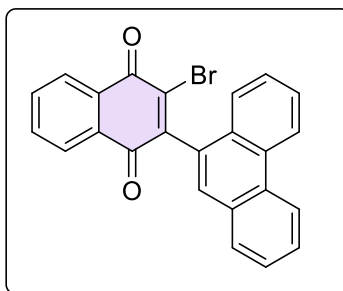

**2-bromo-3-(phenanthren-9-yl)naphthalene-1,4-dione (3s)**

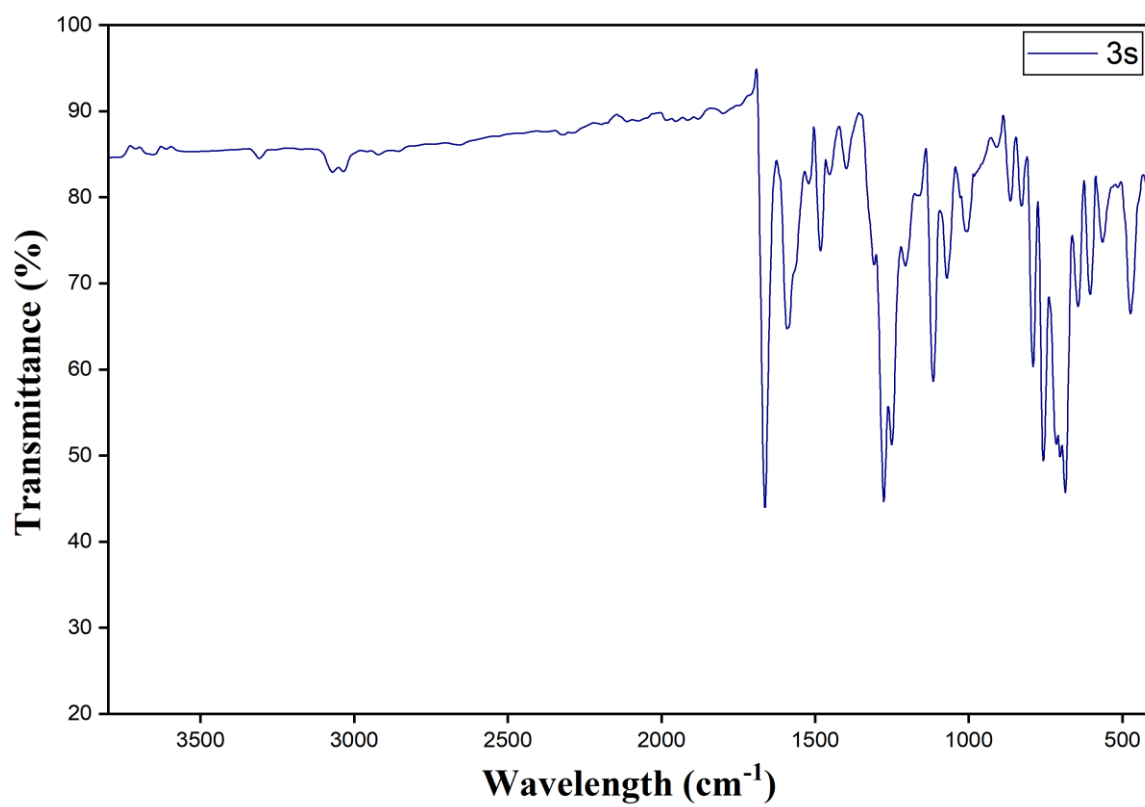

**<sup>1</sup>H NMR (400 MHz, CDCl<sub>3</sub>)**

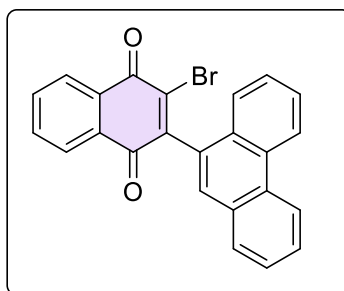

**2-bromo-3-(phenanthren-9-yl)naphthalene-1,4-dione (3s)**

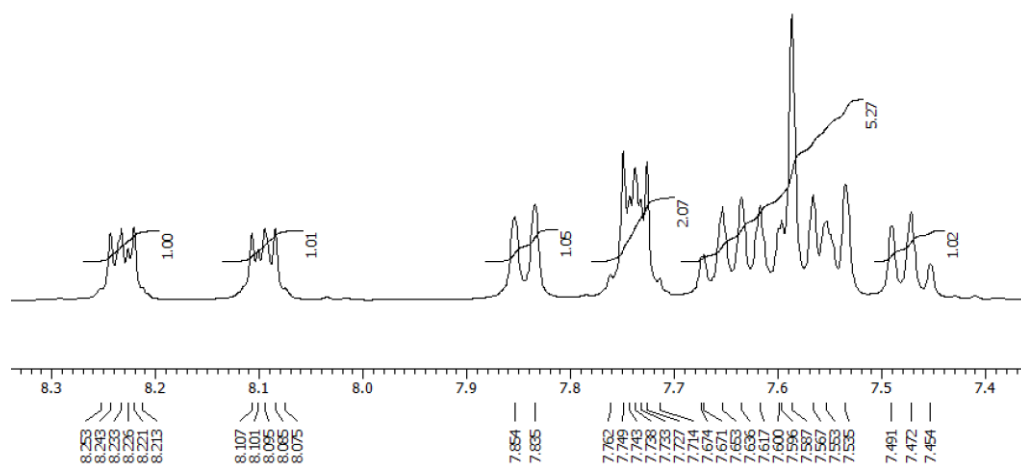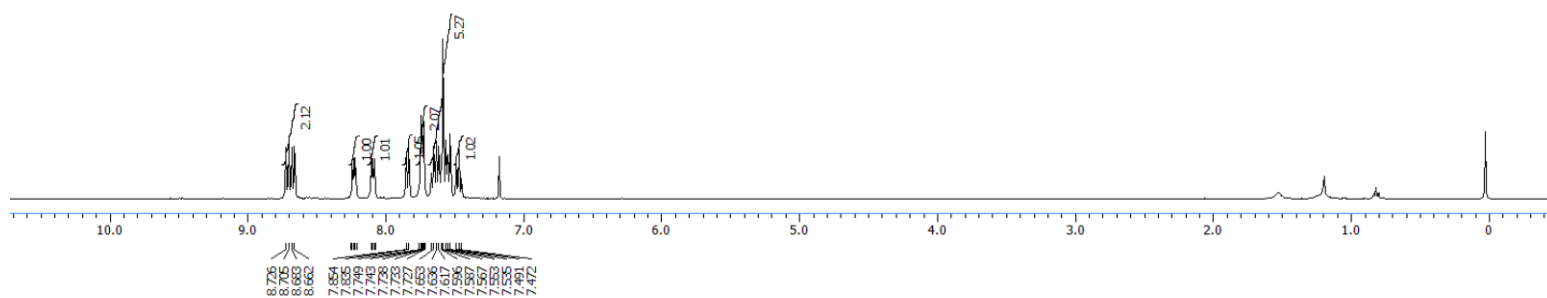

$^{13}\text{C}\{^1\text{H}\}$  NMR (100 MHz,  $\text{CDCl}_3$ )

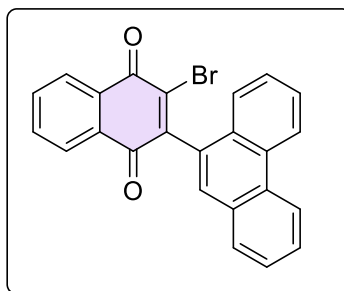

**2-bromo-3-(phenanthren-9-yl)naphthalene-1,4-dione (3s)**

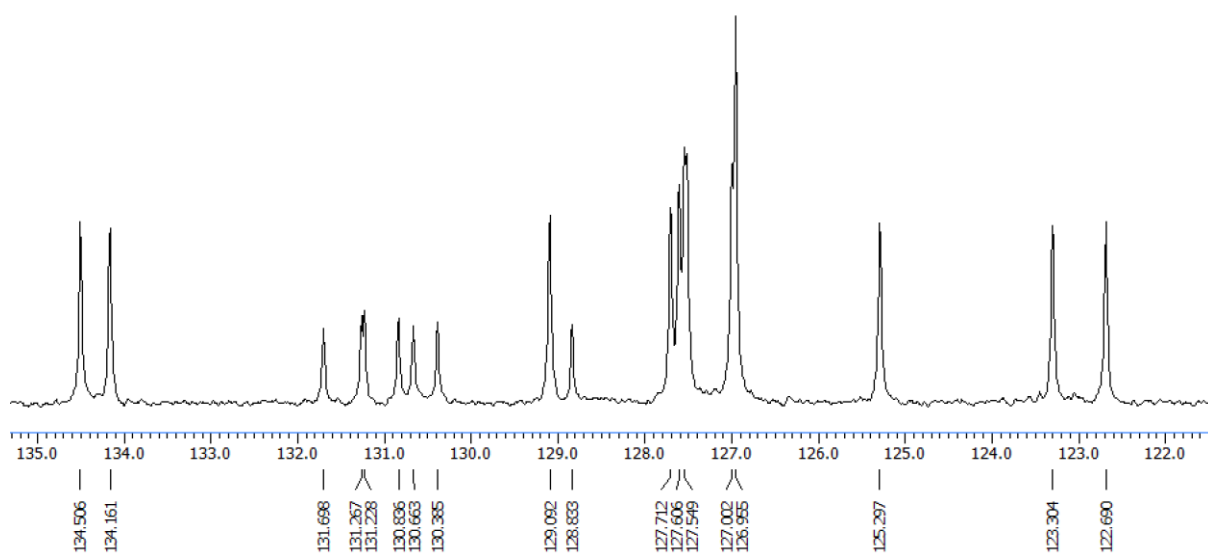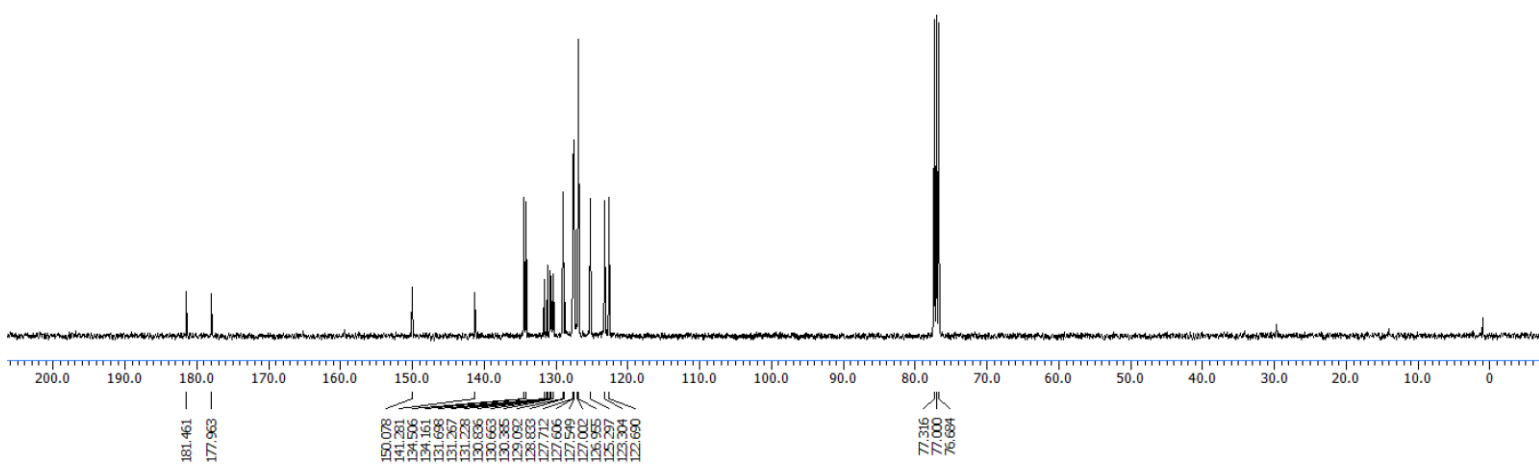

# HRMS



## 2-bromo-3-(phenanthren-9-yl)naphthalene-1,4-dione (3s)

### Qualitative Compound Report

Data File: MNS-353.d  
Sample Type: Sample  
Instrument Name: Instrument 1  
Acq Method: MS Scan.m  
IRM Calibration Status: Success  
Comment:

Sample Name: MNS-353  
Position: P1-08  
User Name:  
Acquired Time: 08-03-2025 12:42:04  
DA Method: Default.m

Sample Group: Info. 3  
Acquisition SW: 6200 series TOF/6500 series  
Version: Q-TOF B.05.01 (B5125)

Compound Table

| Compound Label       | RT    | Mass     | Abund | Formula       | Tgt Mass | Diff (ppm) | MFG Formula   | DB Formula    |
|----------------------|-------|----------|-------|---------------|----------|------------|---------------|---------------|
| Cpd 1: C24 H13 Br O2 | 0.118 | 412.0113 | 15412 | C24 H13 Br O2 | 412.0099 | 3.34       | C24 H13 Br O2 | C24 H13 Br O2 |

| Compound Label       | m/z      | RT    | Algorithm       | Mass     |
|----------------------|----------|-------|-----------------|----------|
| Cpd 1: C24 H13 Br O2 | 415.0171 | 0.118 | Find By Formula | 412.0113 |

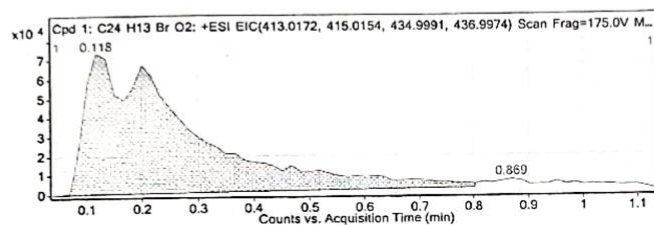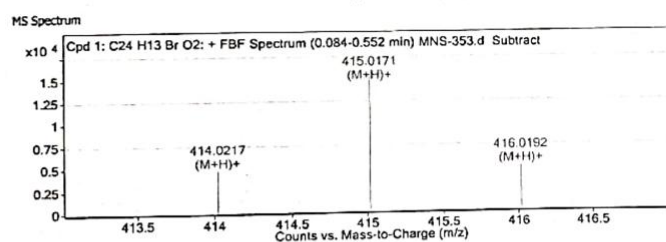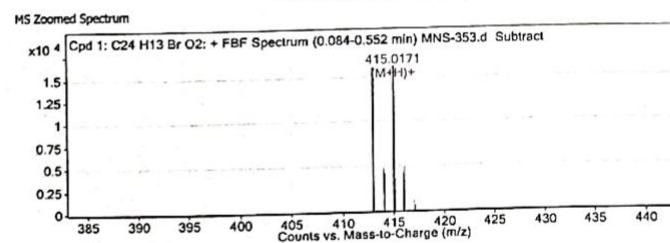

MS Spectrum Peak List

| m/z      | z | Abund    | Formula    | Ion    |
|----------|---|----------|------------|--------|
| 413.0184 | 1 | 14907.75 | C24H14BrO2 | (M+H)+ |
| 414.0217 | 1 | 4704.23  | C24H14BrO2 | (M+H)+ |
| 415.0171 | 1 | 15411.72 | C24H14BrO2 | (M+H)+ |
| 416.0192 | 1 | 4945.3   | C24H14BrO2 | (M+H)+ |
| 417.025  | 1 | 1116.52  | C24H14BrO2 | (M+H)+ |

--- End Of Report ---

## IR Spectra

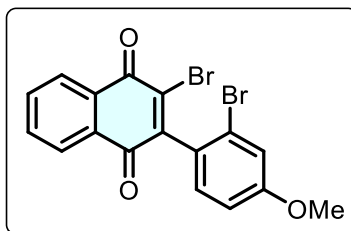

**2-bromo-3-(2-bromo-4-methoxyphenyl)naphthalene-1,4-dione (3t)**

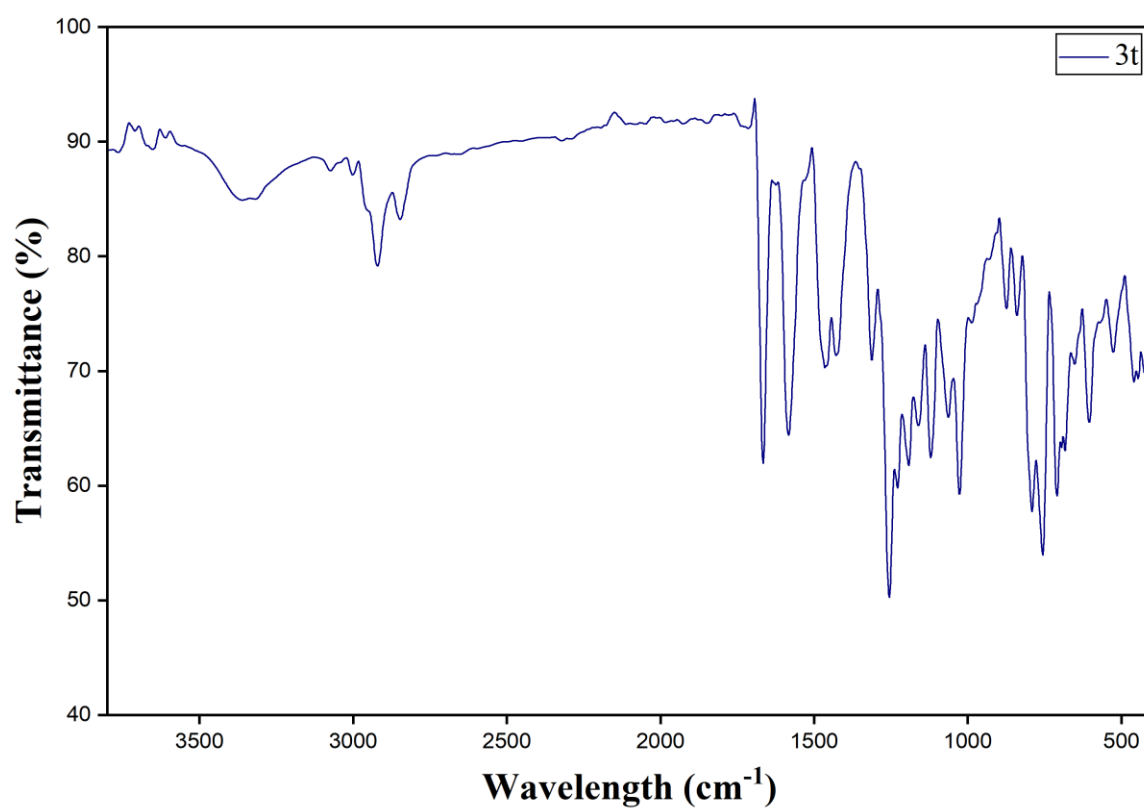

<sup>1</sup>H NMR (400 MHz, CDCl<sub>3</sub>)

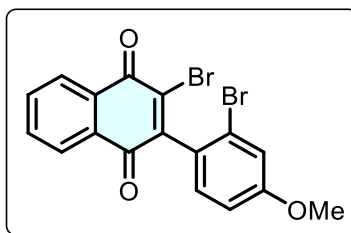

**2-bromo-3-(2-bromo-4-methoxyphenyl)naphthalene-1,4-dione (3t)**

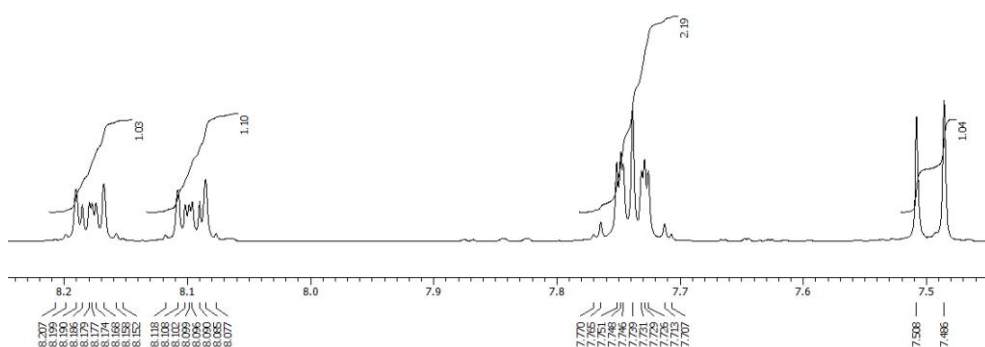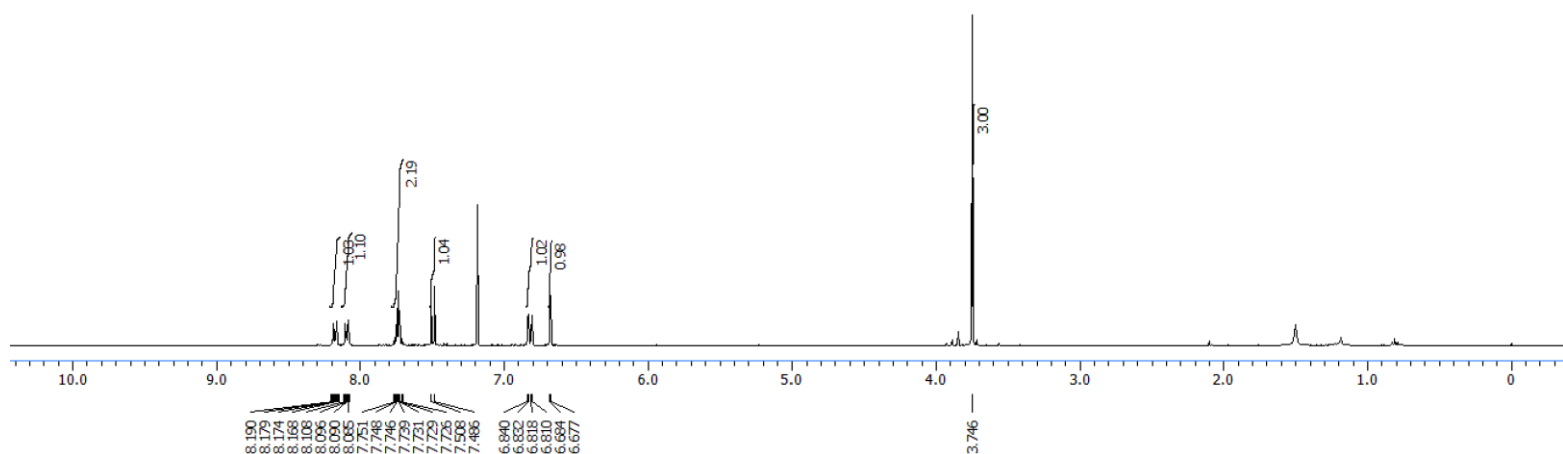

$^{13}\text{C}\{^1\text{H}\}$  NMR (100 MHz,  $\text{CDCl}_3$ )

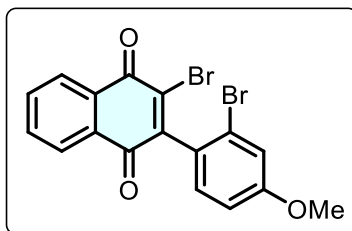

**2-bromo-3-(2-bromo-4-methoxyphenyl)naphthalene-1,4-dione (3t)**

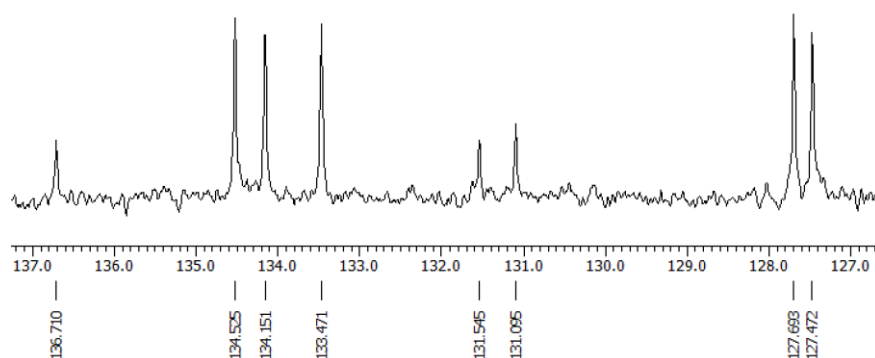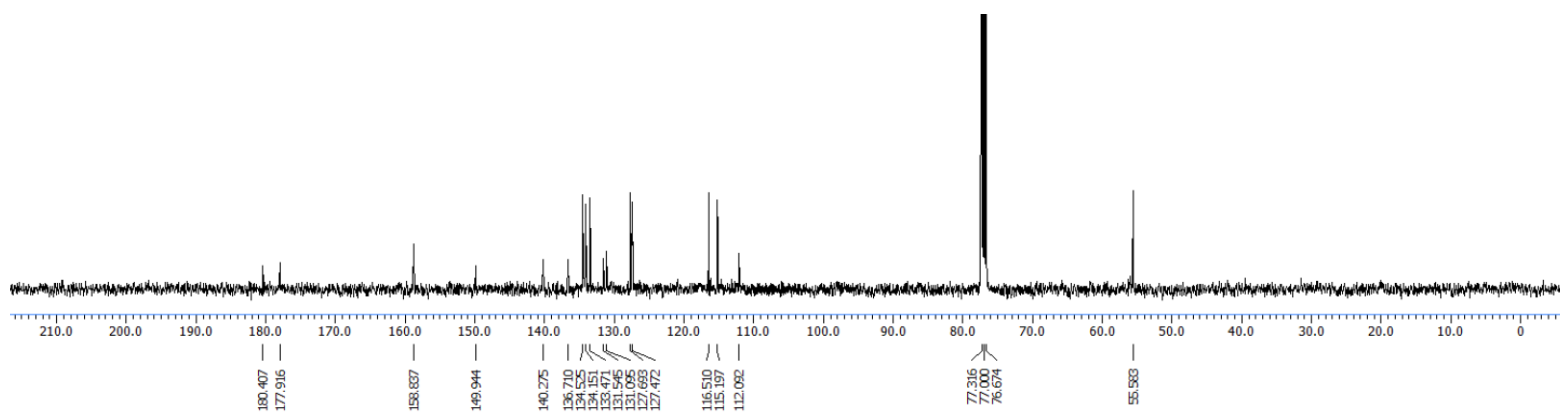

## IR Spectra

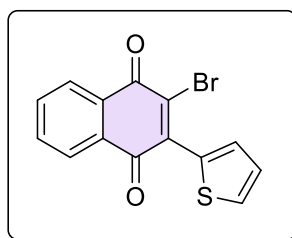

**2-bromo-3-(thiophen-2-yl)naphthalene-1,4-dione (3u)**

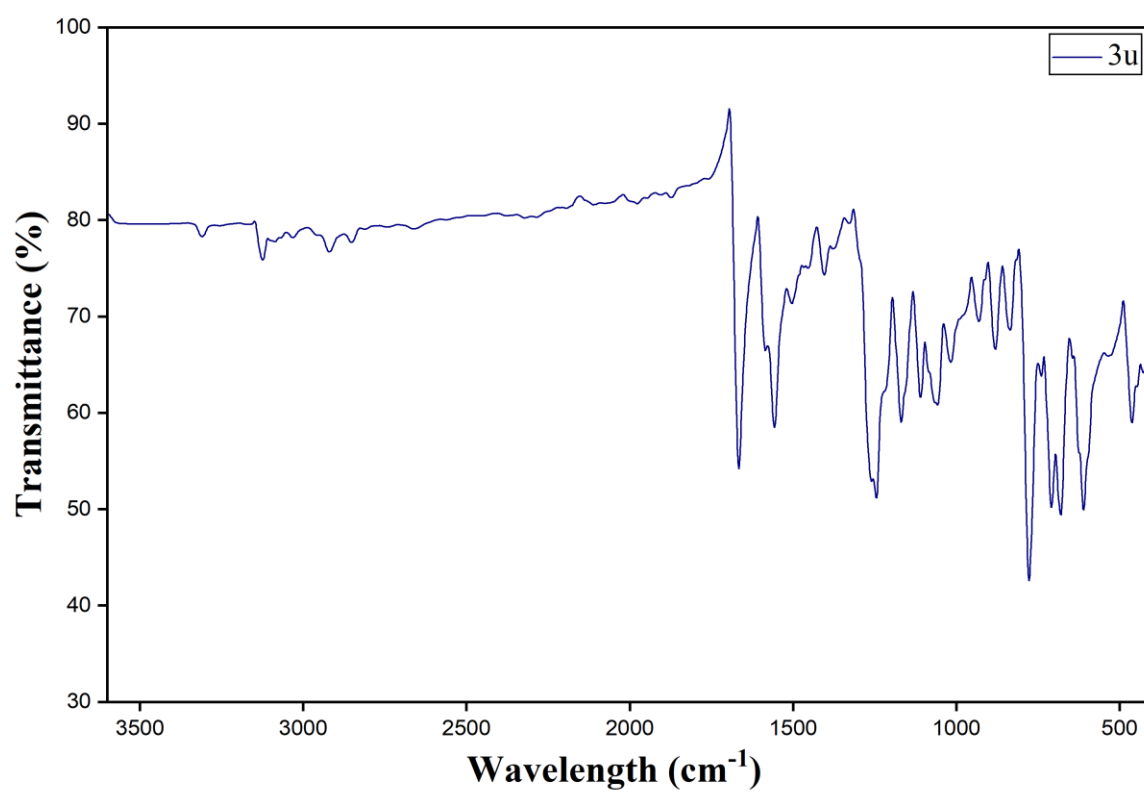



**$^1\text{H}$  NMR (400 MHz,  $\text{CDCl}_3$ )**

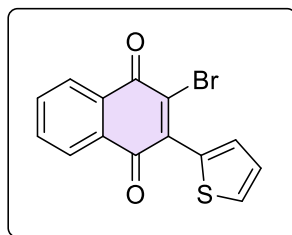

**2-bromo-3-(thiophen-2-yl)naphthalene-1,4-dione (3u)**

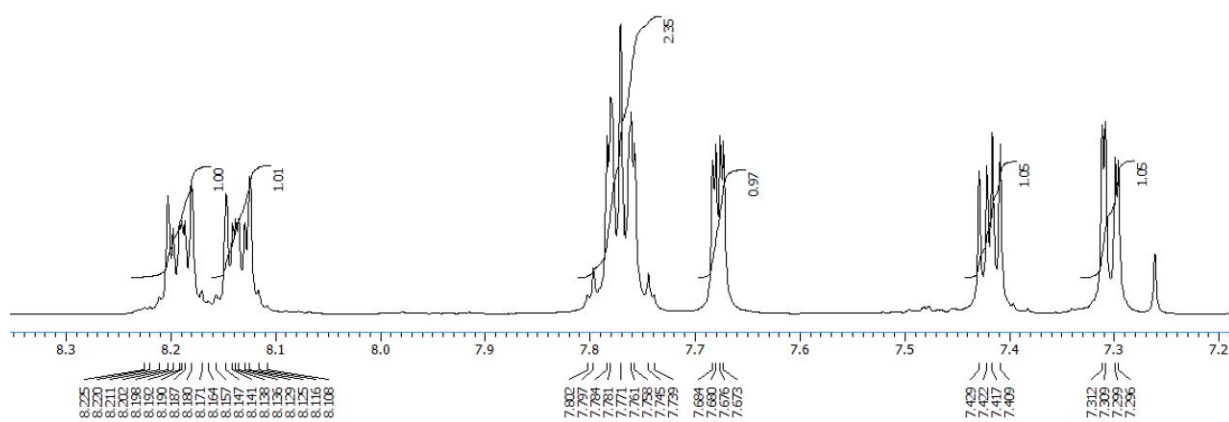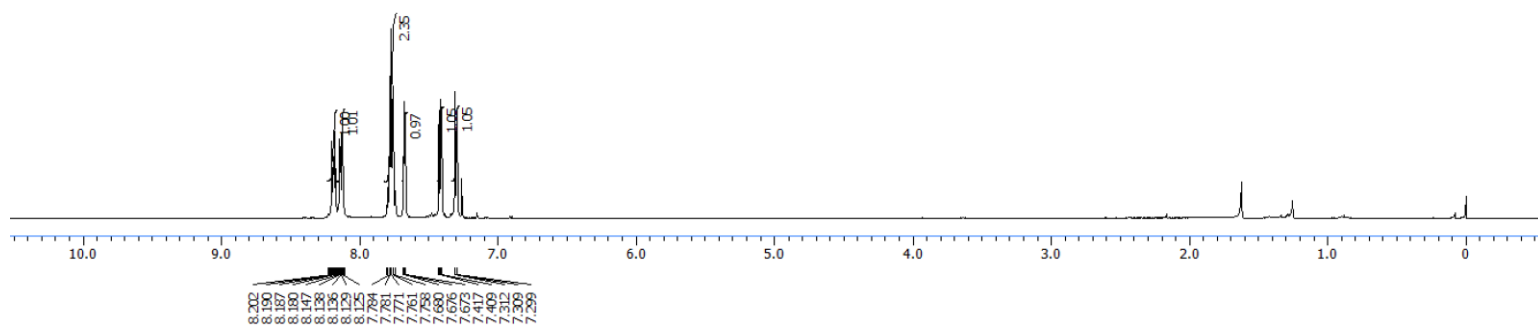

$^{13}\text{C}\{^1\text{H}\}$  NMR (100 MHz,  $\text{CDCl}_3$ )



**2-bromo-3-(thiophen-2-yl)naphthalene-1,4-dione (3u)**

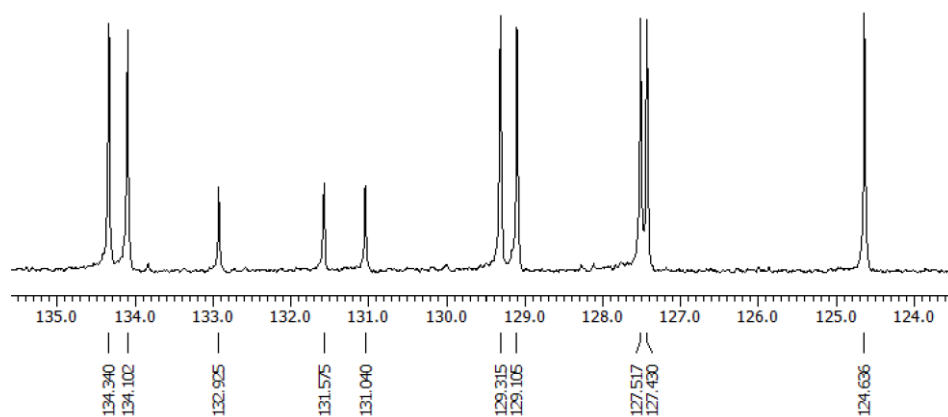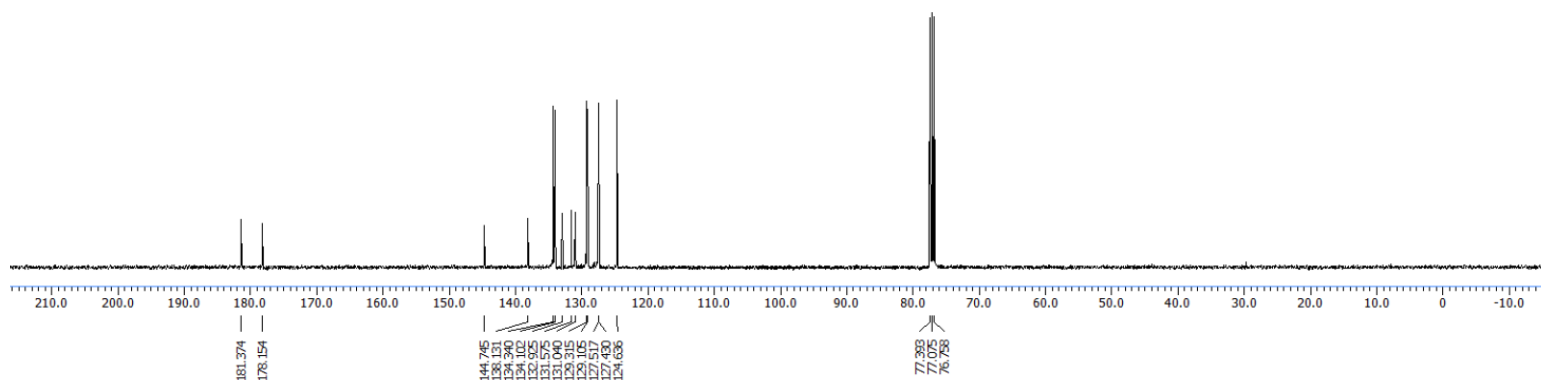

# HRMS

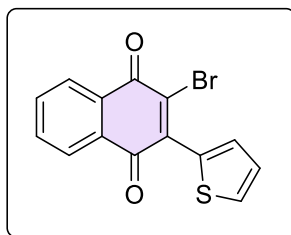

## 2-bromo-3-(thiophen-2-yl)naphthalene-1,4-dione (3u)

### Qualitative Compound Report

Data File: MNS-312.d  
Sample Type: Sample  
Instrument Name: Instrument 1  
Acq Method: MS Scan.m  
IRM Calibration Status: Success  
Comment:

Sample Name: MNS-312  
Position: P1-A9  
User Name:  
Acquired Time: 11-06-2024 13:20:27  
DA Method: Default.m

Sample Group: Info. 3  
Acquisition SW: 6200 series TOF/6500 series  
Version: Q-TOF B.05.01 (05125)

#### Compound Table

| Compound Label        | RT   | Mass     | Abund | Formula        | Tgt Mass | Diff (ppm) | MFG Formula    | DB Formula     |
|-----------------------|------|----------|-------|----------------|----------|------------|----------------|----------------|
| Cpd 1: C14 H7 Br O2 S | 0.18 | 317.9368 | 21647 | C14 H7 Br O2 S | 317.935  | 5.7        | C14 H7 Br O2 S | C14 H7 Br O2 S |

| Compound Label        | m/z     | RT   | Algorithm       | Mass     |
|-----------------------|---------|------|-----------------|----------|
| Cpd 1: C14 H7 Br O2 S | 320.942 | 0.18 | Find By Formula | 317.9368 |

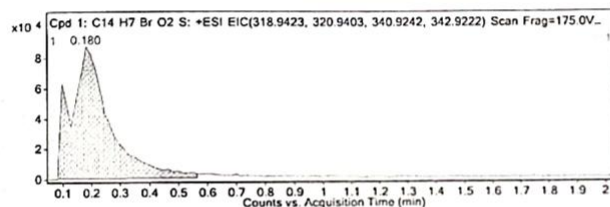

#### MS Spectrum

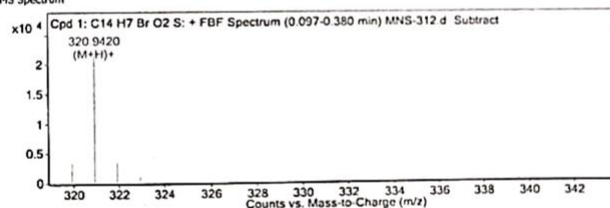

#### MS Zoomed Spectrum

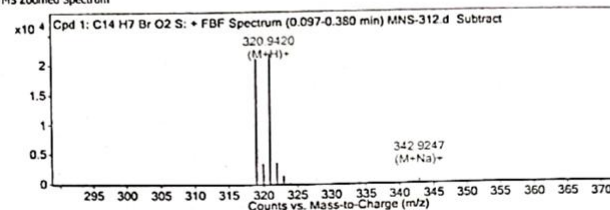

#### MS Spectrum Peak List

| m/z      | z | Abund    | Formula      | Ion     |
|----------|---|----------|--------------|---------|
| 318.9441 | 1 | 21016.16 | C14H8BrO2S   | (M+H)+  |
| 319.9473 | 1 | 3454.53  | C14H8BrO2S   | (M+H)+  |
| 320.942  | 1 | 21647.11 | C14H8BrO2S   | (M+H)+  |
| 321.9456 | 1 | 3515.03  | C14H8BrO2S   | (M+H)+  |
| 322.941  | 1 | 1209.5   | C14H8BrO2S   | (M+H)+  |
| 323.9454 | 1 | 140.54   | C14H8BrO2S   | (M+H)+  |
| 342.9247 | 1 | 333.55   | C14H7BrNaO2S | (M+Na)+ |
| 343.9211 | 1 | 62.64    | C14H7BrNaO2S | (M+Na)+ |

--- End Of Report ---

## IR Spectra

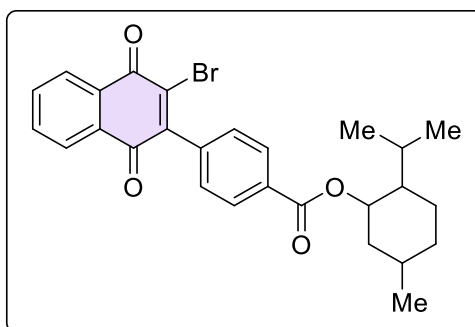

**2-isopropyl-5-methylcyclohexyl 4-(3-bromo-1,4-dioxo-1,4-dihydronaphthalen-2-yl)benzoate (3v)**

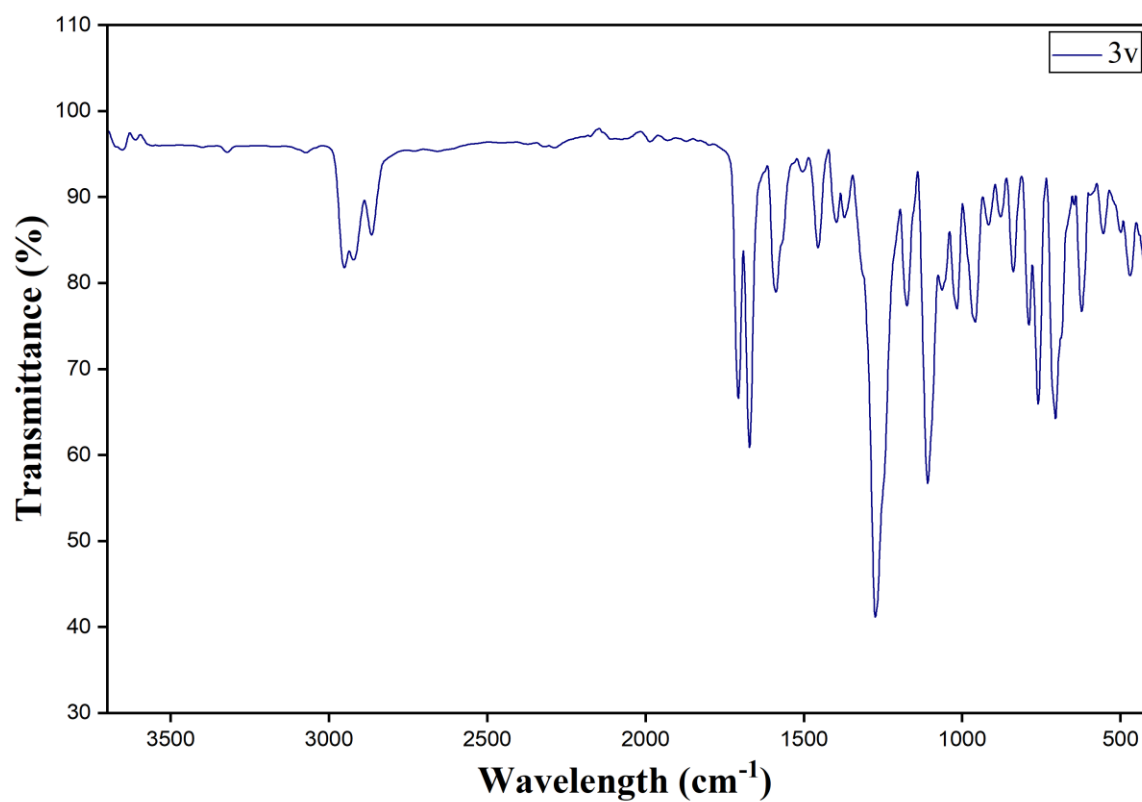

<sup>1</sup>H NMR (400 MHz, CDCl<sub>3</sub>)

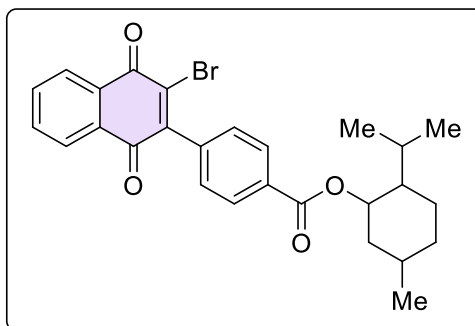

**2-isopropyl-5-methylcyclohexyl 4-(3-bromo-1,4-dioxo-1,4-dihydronaphthalen-2-yl)benzoate (3v)**

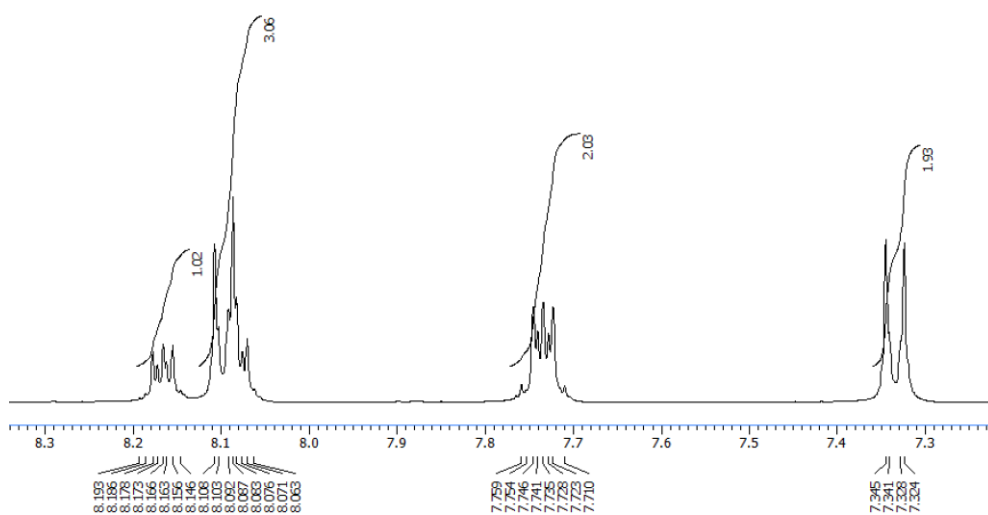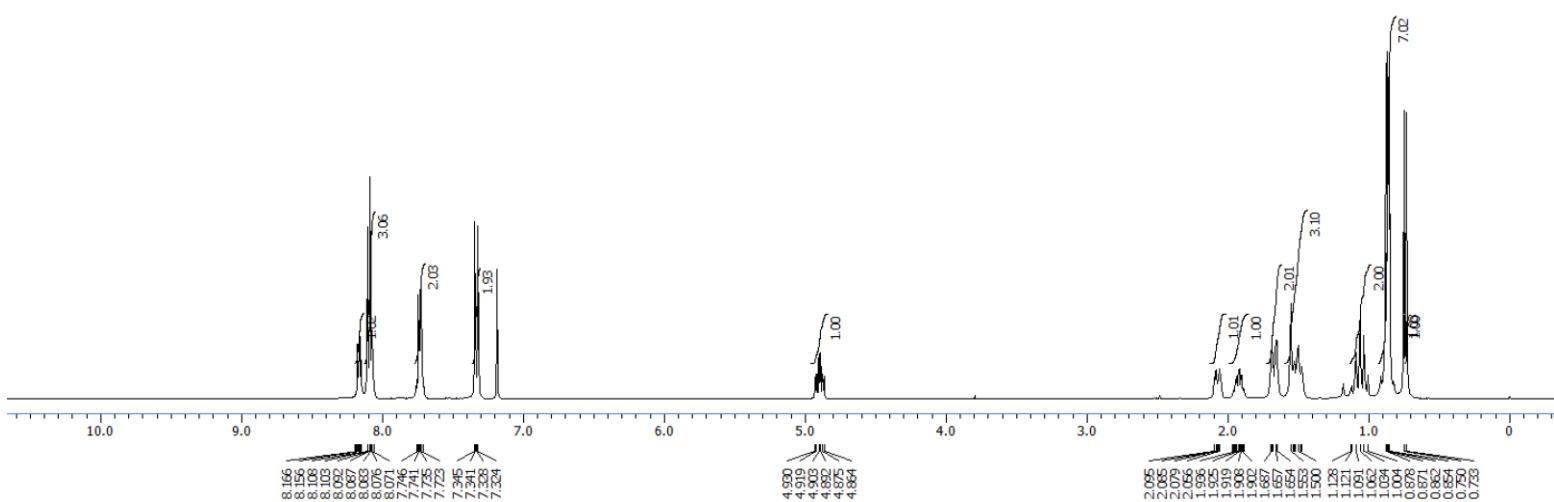

$^{13}\text{C}\{^1\text{H}\}$  NMR (100 MHz,  $\text{CDCl}_3$ )



**2-isopropyl-5-methylcyclohexyl 4-(3-bromo-1,4-dioxo-1,4-dihydronaphthalen-2-yl)benzoate (3v)**

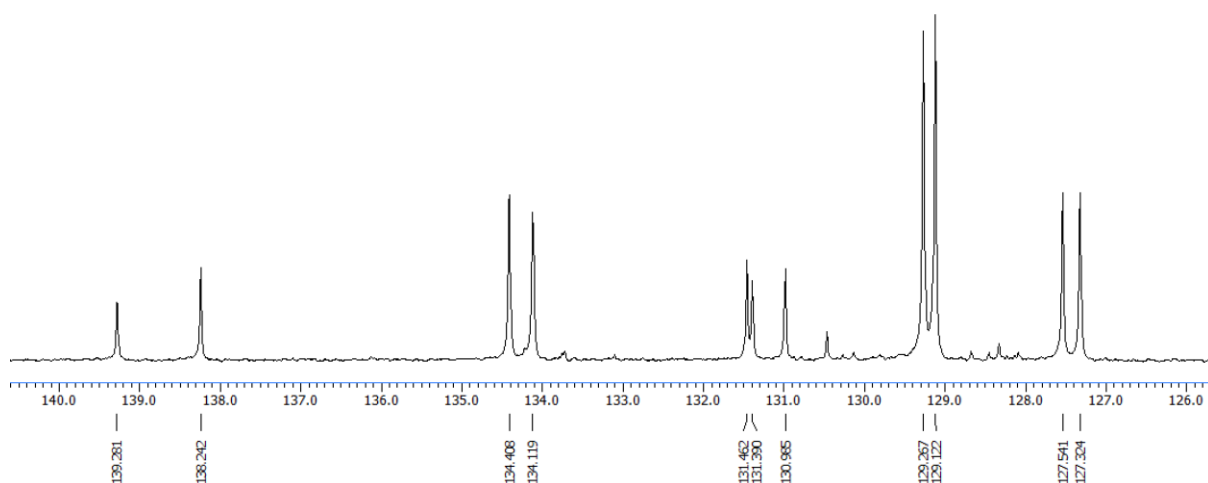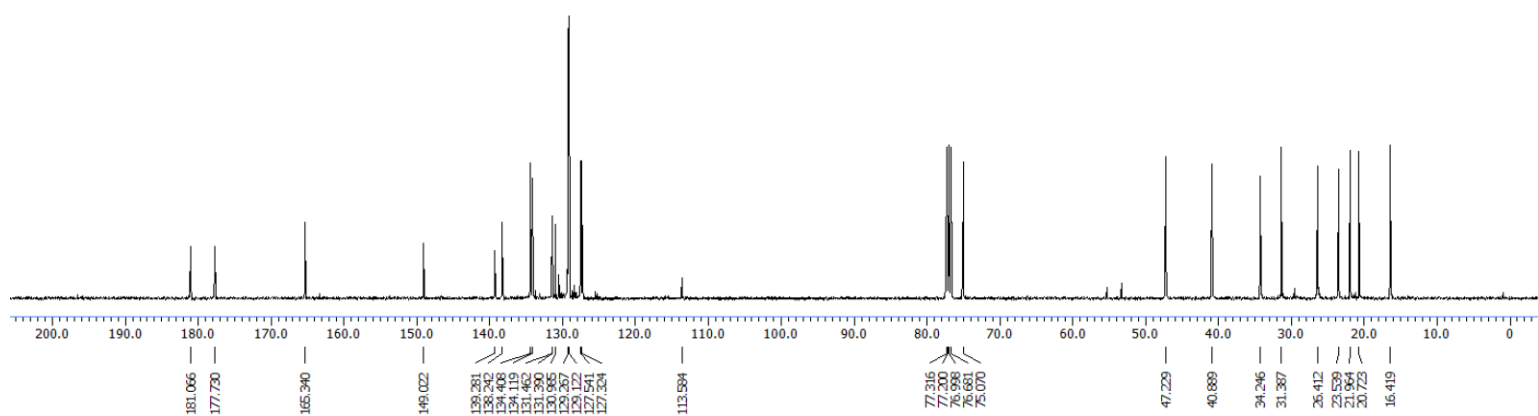

# HRMS



## 2-isopropyl-5-methylcyclohexyl 4-(3-bromo-1,4-dioxo-1,4-dihydronaphthalen-2-yl)benzoate (3v)

### Qualitative Compound Report

**Data File** MNS-ME.d **Sample Name** MNS-ME  
**Sample Type** Sample **Position** P1-C7  
**Instrument Name** Instrument 1 **User Name**  
**Acq Method** MS Scan.m **Acquired Time** 20-03-2025 14:50:34  
**IRM Calibration Status** Success **DA Method** Default.m  
**Comment**  
**Sample Group** Info. 3  
**Acquisition SW** 6200 series TOF/6500 series  
**Version** Q-TOF 8.05.01 (05125)

| Compound Label       | RT    | Mass     | Abund | Formula       | Tgt Mass | Diff (ppm) | MFG Formula   | DB Formula    |
|----------------------|-------|----------|-------|---------------|----------|------------|---------------|---------------|
| Cpd 1: C27 H27 Br O4 | 0.138 | 494.1095 | 12352 | C27 H27 Br O4 | 494.1093 | 0.49       | C27 H27 Br O4 | C27 H27 Br O4 |

| Compound Label       | m/z      | RT    | Algorithm       | Mass     |
|----------------------|----------|-------|-----------------|----------|
| Cpd 1: C27 H27 Br O4 | 497.1147 | 0.138 | Find By Formula | 494.1095 |

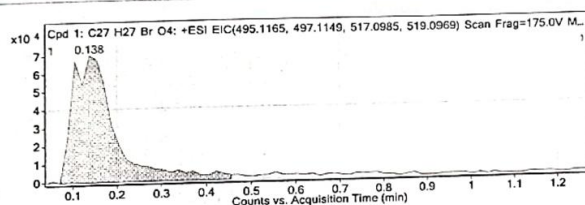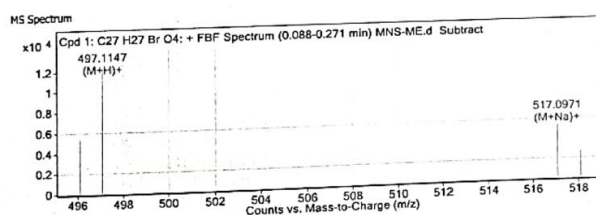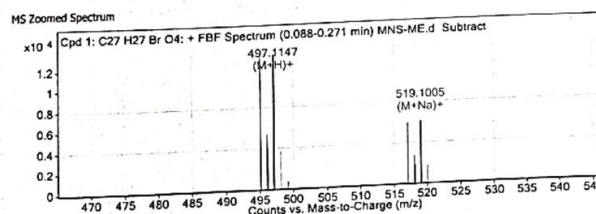

| m/z      | z | Abund    | Formula      | Ion     |
|----------|---|----------|--------------|---------|
| 495.1165 | 1 | 12085.8  | C27H28BrO4   | (M+H)+  |
| 496.12   | 1 | 5300.6   | C27H28BrO4   | (M+H)+  |
| 497.1147 | 1 | 12351.86 | C27H28BrO4   | (M+H)+  |
| 517.0971 | 1 | 5347.51  | C27H27BrNaO4 | (M+Na)+ |
| 518.1022 | 1 | 2688.95  | C27H27BrNaO4 | (M+Na)+ |
| 519.1005 | 1 | 5638.95  | C27H27BrNaO4 | (M+Na)+ |

--- End Of Report ---

## IR Spectra

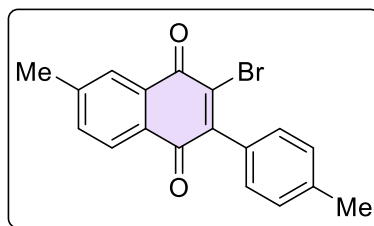

**3-bromo-6-methyl-2-(*p*-tolyl)naphthalene-1,4-dione (3w)**

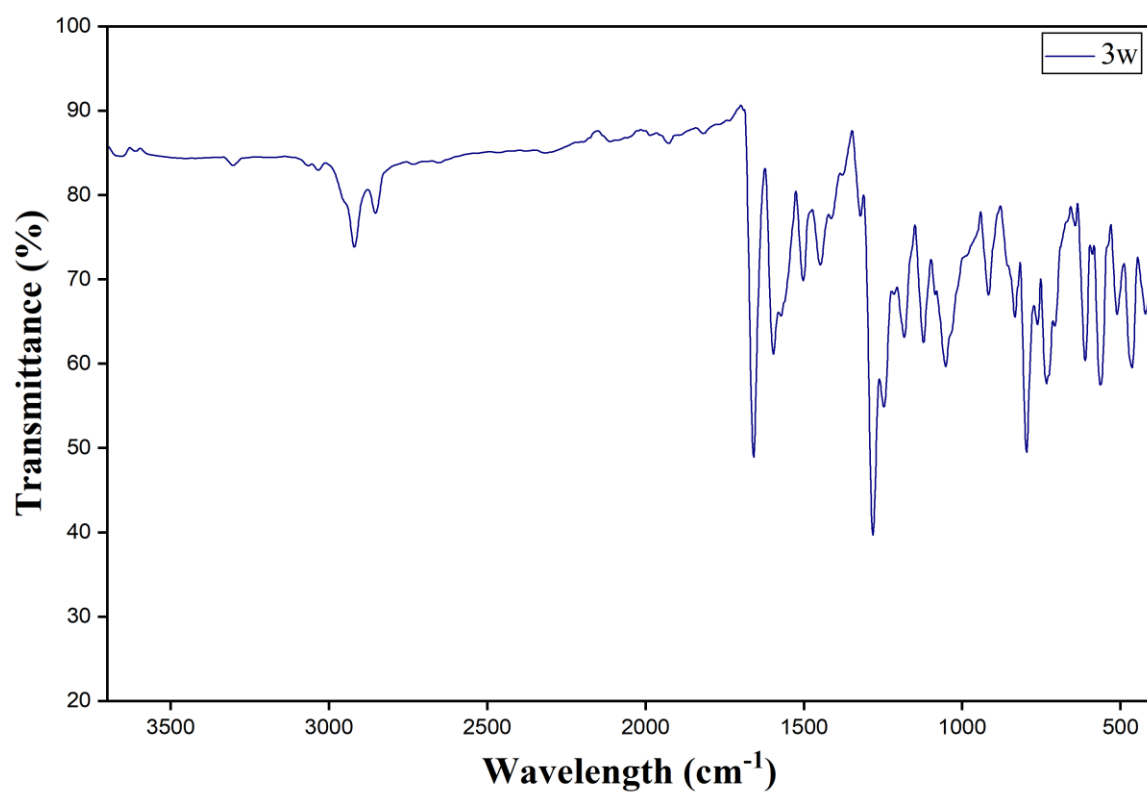



<sup>1</sup>H NMR (400 MHz, CDCl<sub>3</sub>)

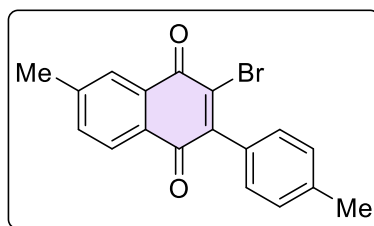

**3-bromo-6-methyl-2-(*p*-tolyl)naphthalene-1,4-dione (3w)**

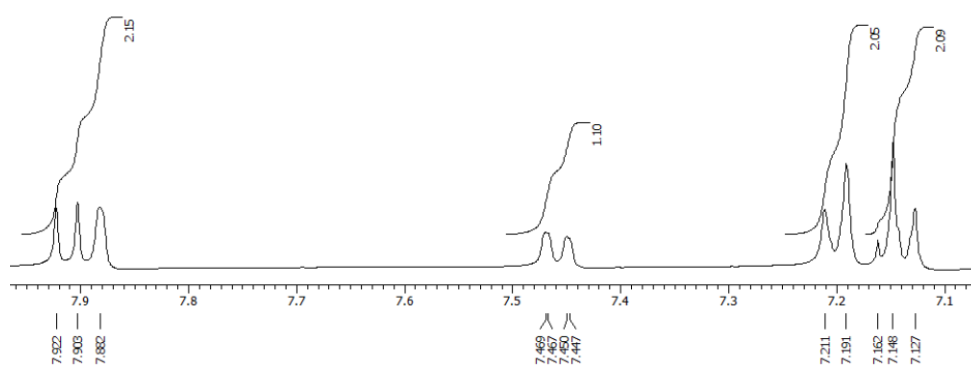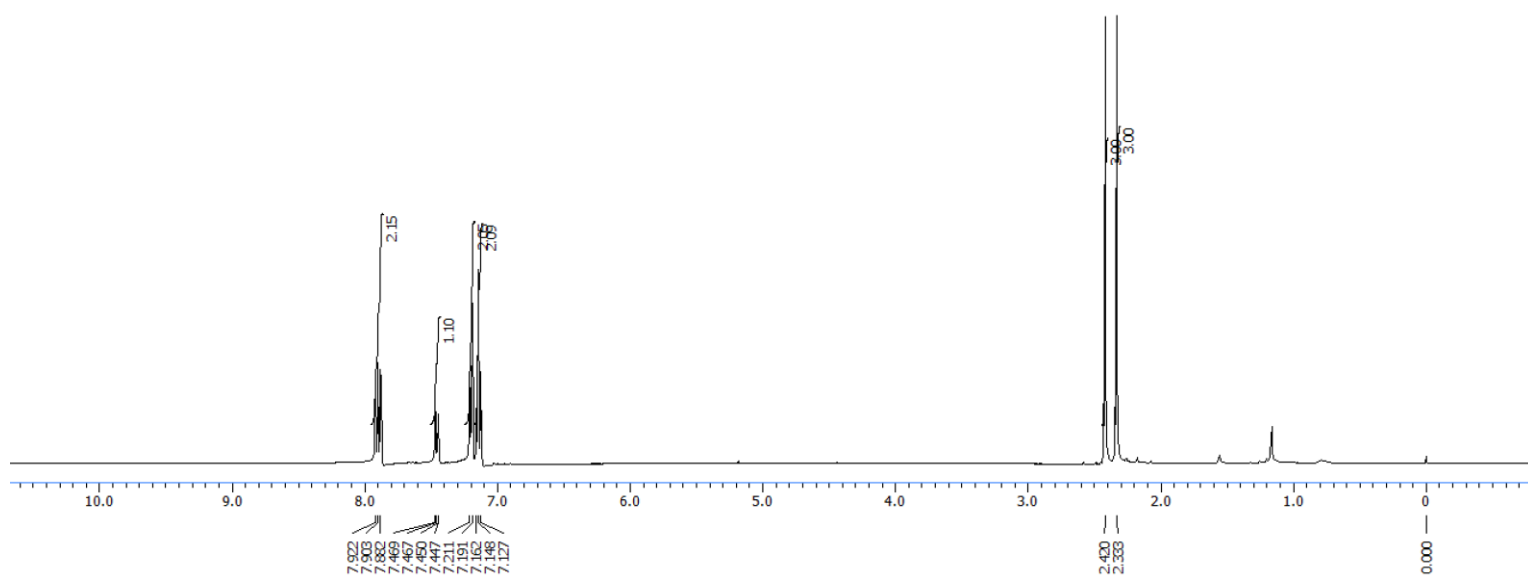

$^{13}\text{C}\{^1\text{H}\}$  NMR (100 MHz,  $\text{CDCl}_3$ )

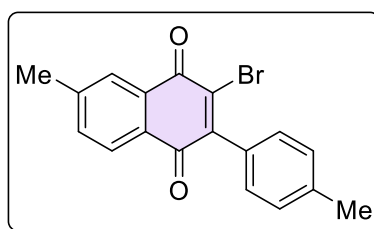

**3-bromo-6-methyl-2-(*p*-tolyl)naphthalene-1,4-dione (3w)**

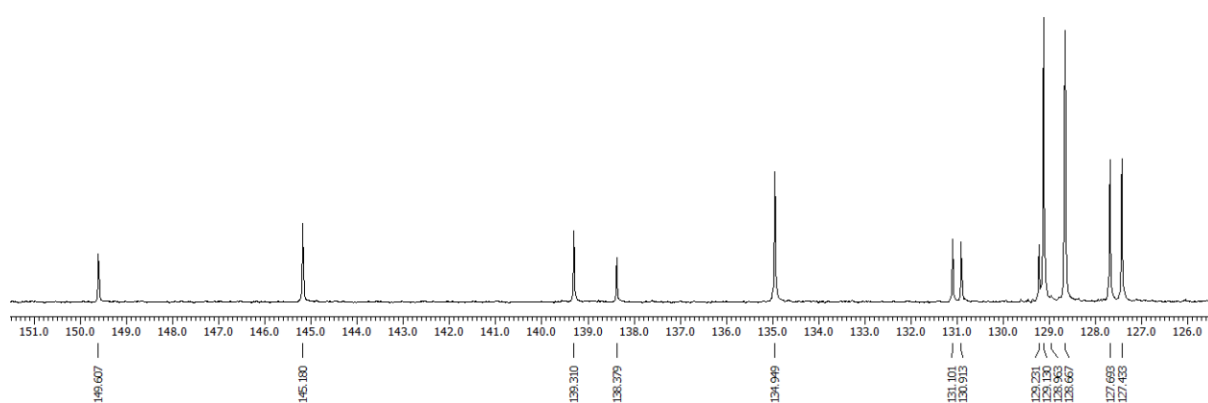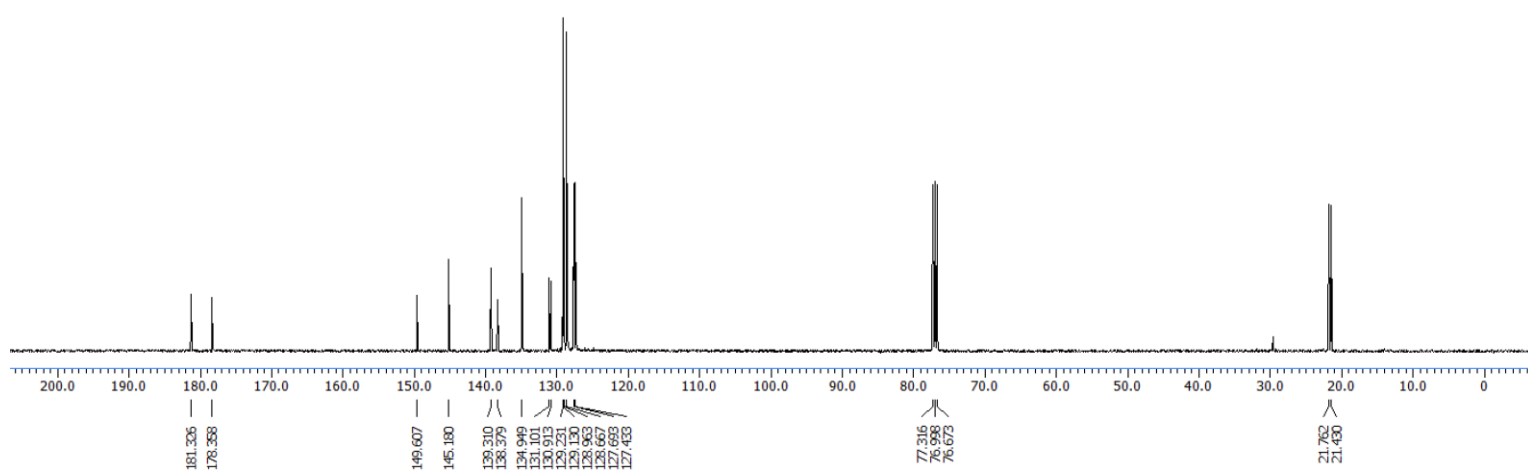

# HRMS

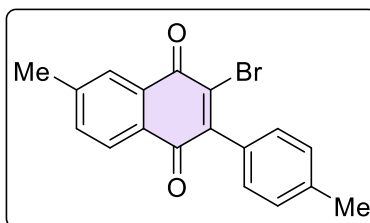

**3-bromo-6-methyl-2-(p-tolyl)naphthalene-1,4-dione (3w)**

## Qualitative Compound Report

Data File: MNS-307.d  
Sample Type: Sample  
Instrument Name: Instrument 1  
Acq Method: MS Scan.m  
IRM Calibration Status: Success  
Comment: DA Method: Default.m

Sample Group: Info. 3  
Acquisition SW: 6200 series TOF/6500 series  
Version: Q-TOF B.05.01 (B5125)

### Compound Table

| Compound Label       | RT   | Mass     | Abund | Formula       | Tgt Mass | Diff (ppm) | MFG Formula   | DB Formula    |
|----------------------|------|----------|-------|---------------|----------|------------|---------------|---------------|
| Cpd 1: C18 H13 Br O2 | 0.27 | 340.0112 | 40723 | C18 H13 Br O2 | 340.0099 | 3.79       | C18 H13 Br O2 | C18 H13 Br O2 |

| Compound Label       | m/z      | RT   | Algorithm       | Mass     |
|----------------------|----------|------|-----------------|----------|
| Cpd 1: C18 H13 Br O2 | 341.0185 | 0.27 | Find By Formula | 340.0112 |

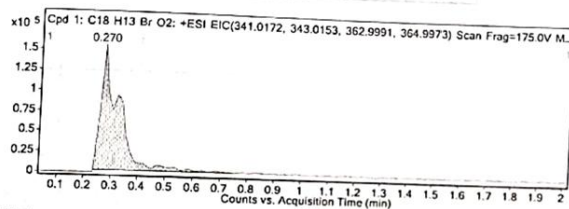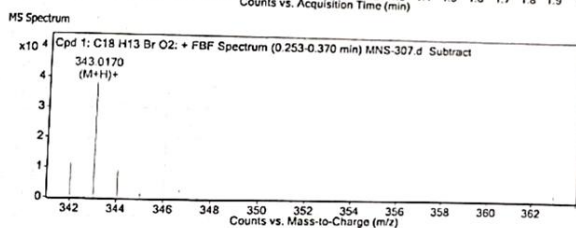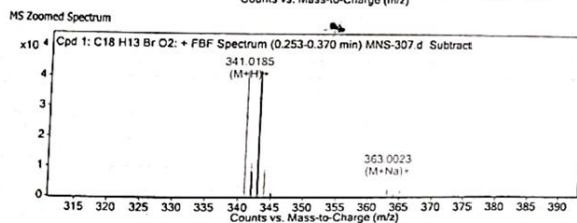

MS Spectrum Peak List

| m/z      | z | Abund    | Formula      | Ion     |
|----------|---|----------|--------------|---------|
| 341.0185 | 1 | 40722.85 | C18H14BrO2   | (M+H)+  |
| 342.0187 | 1 | 11128.54 | C18H14BrO2   | (M+H)+  |
| 343.017  | 1 | 38246.57 | C18H14BrO2   | (M+H)+  |
| 344.0198 | 1 | 9322     | C18H14BrO2   | (M+H)+  |
| 345.0339 | 1 | 1677.25  | C18H14BrO2   | (M+H)+  |
| 363.0023 | 1 | 2096.13  | C18H13BrNaO2 | (M+Na)+ |
| 364.0069 | 1 | 507.7    | C18H13BrNaO2 | (M+Na)+ |

--- End Of Report ---

## IR Spectra

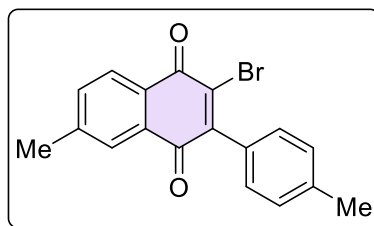

**3-bromo-7-methyl-2-(*p*-tolyl)naphthalene-1,4-dione (3x)**

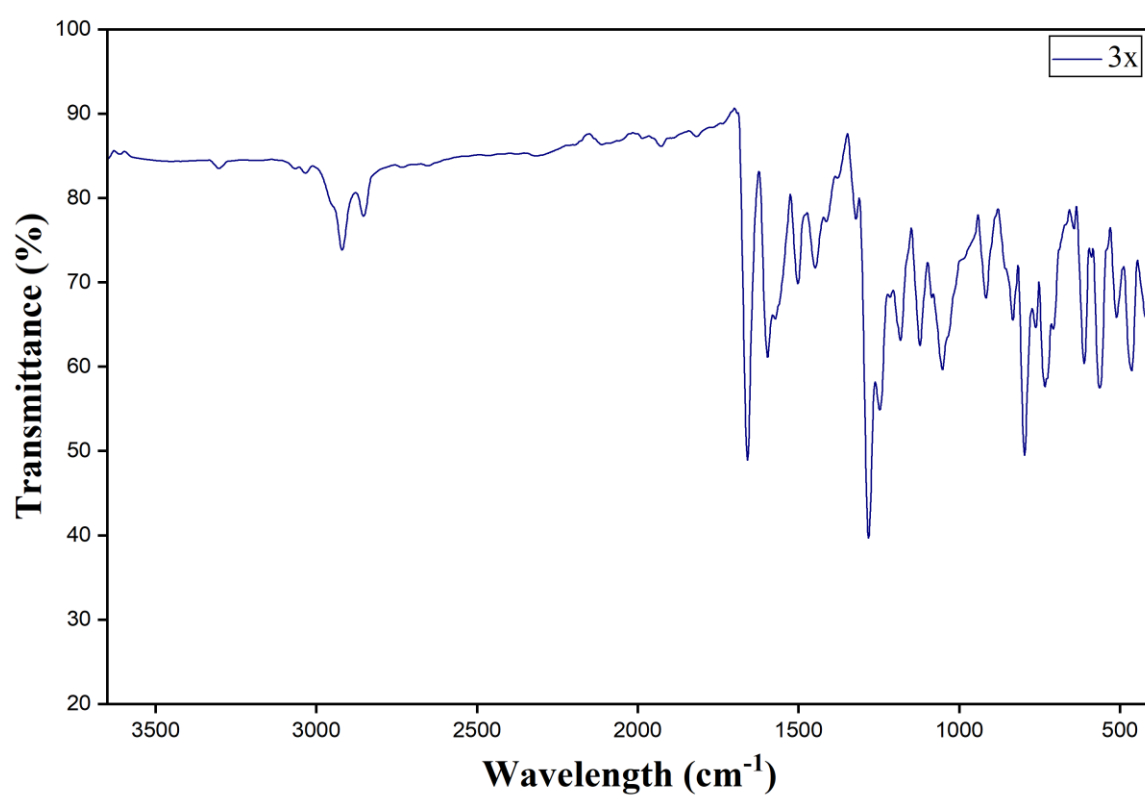

**<sup>1</sup>H NMR (400 MHz, CDCl<sub>3</sub>)**

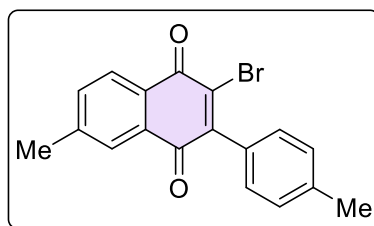

**3-bromo-7-methyl-2-(*p*-tolyl)naphthalene-1,4-dione (3x)**

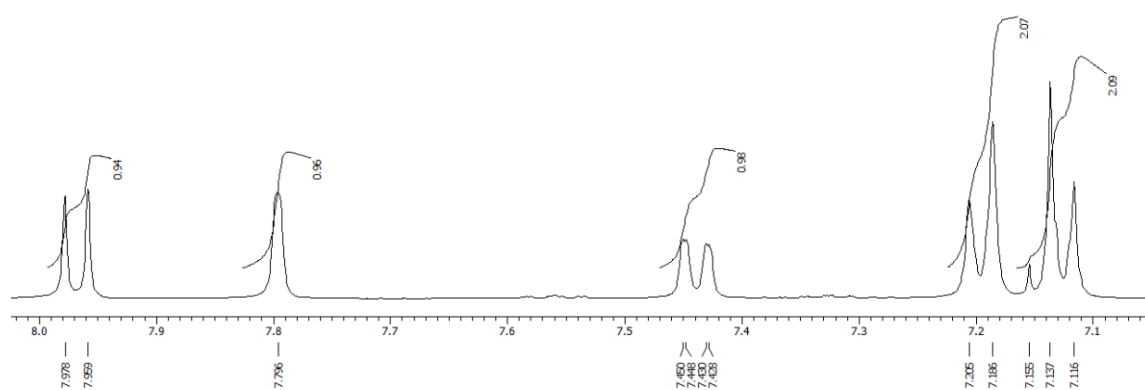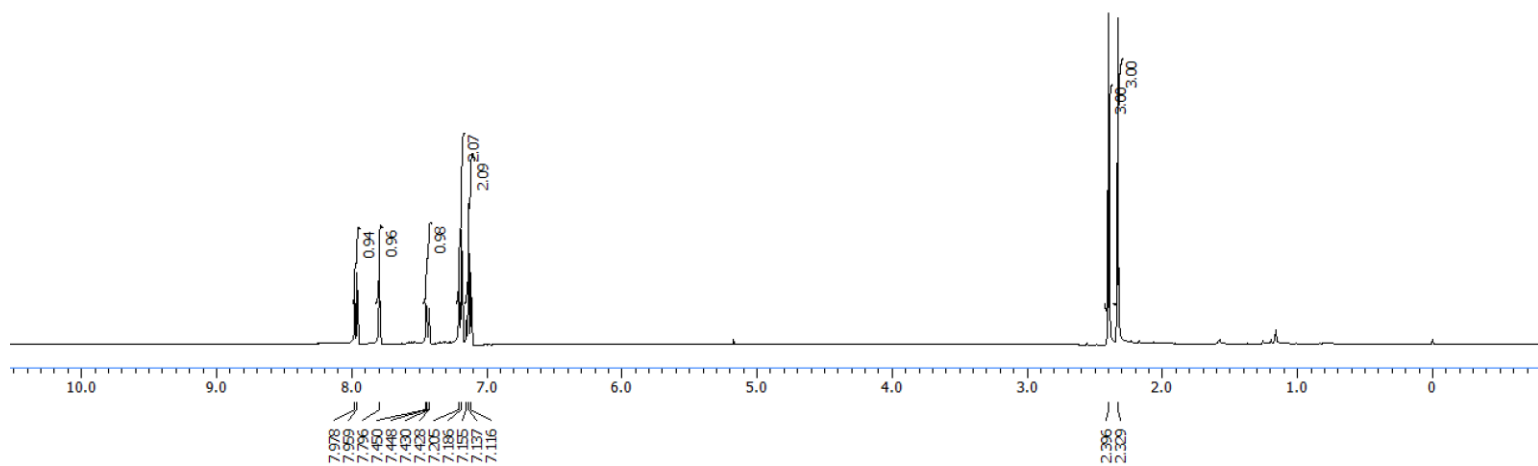

$^{13}\text{C}\{^1\text{H}\}$  NMR (100 MHz,  $\text{CDCl}_3$ )



**3-bromo-7-methyl-2-(*p*-tolyl)naphthalene-1,4-dione (3x)**

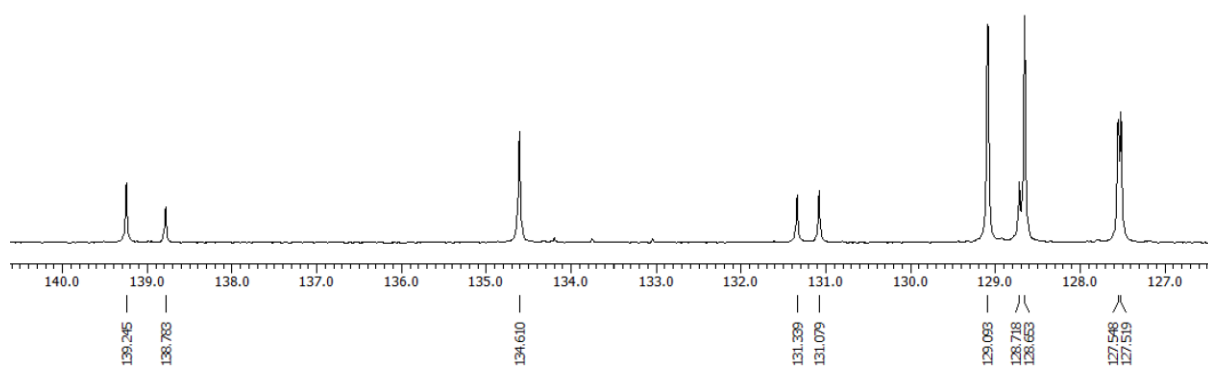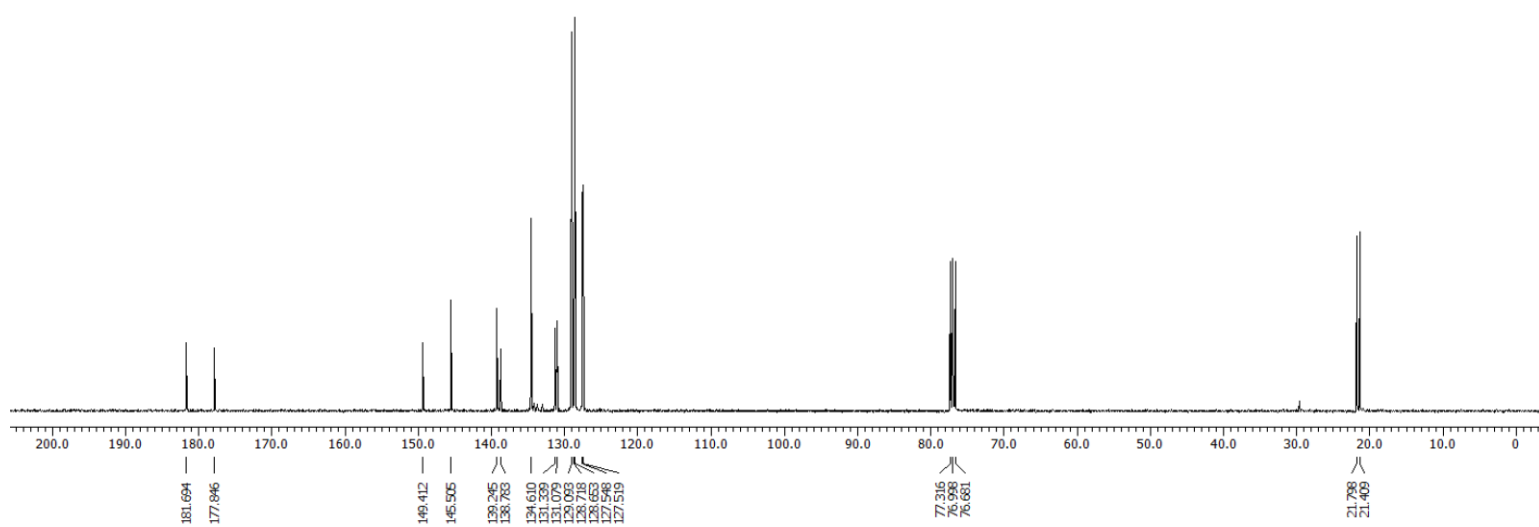

# HRMS

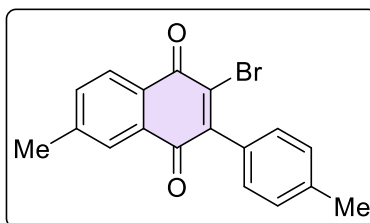

**3-bromo-7-methyl-2-(p-tolyl)naphthalene-1,4-dione (3x)**

## Qualitative Compound Report

Data File: MNS-308.d  
Sample Type: Sample  
Instrument Name: Instrument 1  
Acq Method: MS Scan.m  
IRM Calibration Status: Success  
Comment: Success

Sample Name: MNS-308  
Position: P1-B2  
User Name: User Name  
Acquired Time: 11-05-2024 13:24:12  
DA Method: Default.m

Sample Group: Info. 3  
Acquisition SW: 6200 series TOF/6500 series  
Version: Q-TOF B.05.01 (B5125)

### Compound Table

| Compound Label       | RT    | Mass     | Abund  | Formula       | Tgt Mass | Diff (ppm) | MFG Formula   | DB Formula    |
|----------------------|-------|----------|--------|---------------|----------|------------|---------------|---------------|
| Cpd 1: C18 H13 Br O2 | 0.155 | 340.0123 | 198976 | C18 H13 Br O2 | 340.0099 | 7.17       | C18 H13 Br O2 | C18 H13 Br O2 |

| Compound Label       | m/z      | RT    | Algorithm       | Mass     |
|----------------------|----------|-------|-----------------|----------|
| Cpd 1: C18 H13 Br O2 | 341.0196 | 0.155 | Find By Formula | 340.0123 |

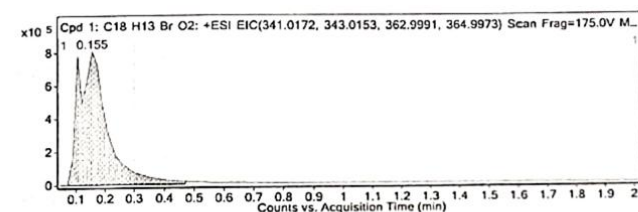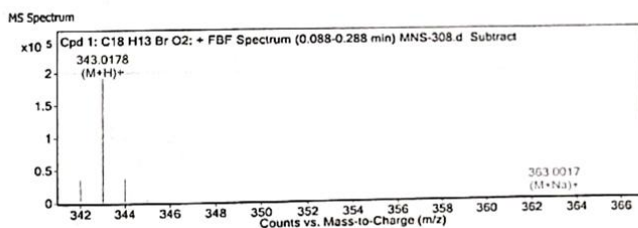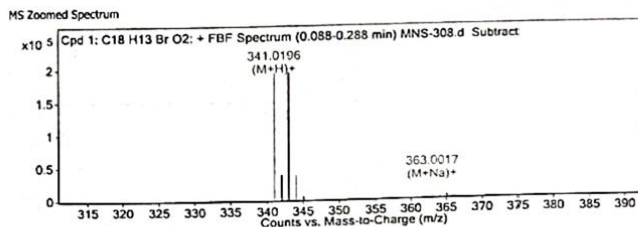

### MS Spectrum Peak List

| m/z      | z | Abund     | Formula      | Ion     |
|----------|---|-----------|--------------|---------|
| 341.0196 | 1 | 198975.84 | C18H14BrO2   | (M+H)+  |
| 342.0229 | 1 | 36906.7   | C18H14BrO2   | (M+H)+  |
| 343.0178 | 1 | 192492.22 | C18H14BrO2   | (M+H)+  |
| 344.0209 | 1 | 35392.73  | C18H14BrO2   | (M+H)+  |
| 345.0239 | 1 | 4378.64   | C18H14BrO2   | (M+H)+  |
| 346.0271 | 1 | 309.46    | C18H14BrO2   | (M+H)+  |
| 363.0017 | 1 | 3811.13   | C18H13BrNaO2 | (M+Na)+ |
| 364.0053 | 1 | 752.79    | C18H13BrNaO2 | (M+Na)+ |
| 364.9998 | 1 | 3668.69   | C18H13BrNaO2 | (M+Na)+ |
| 366.0032 | 1 | 773.53    | C18H13BrNaO2 | (M+Na)+ |

--- End Of Report ---

## IR Spectra

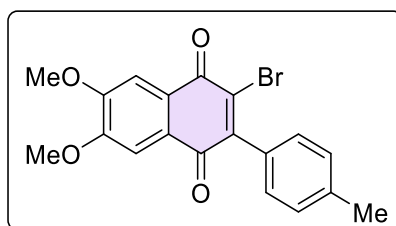

**2-bromo-6,7-dimethoxy-3-(*p*-tolyl)naphthalene-1,4-dione (3y)**

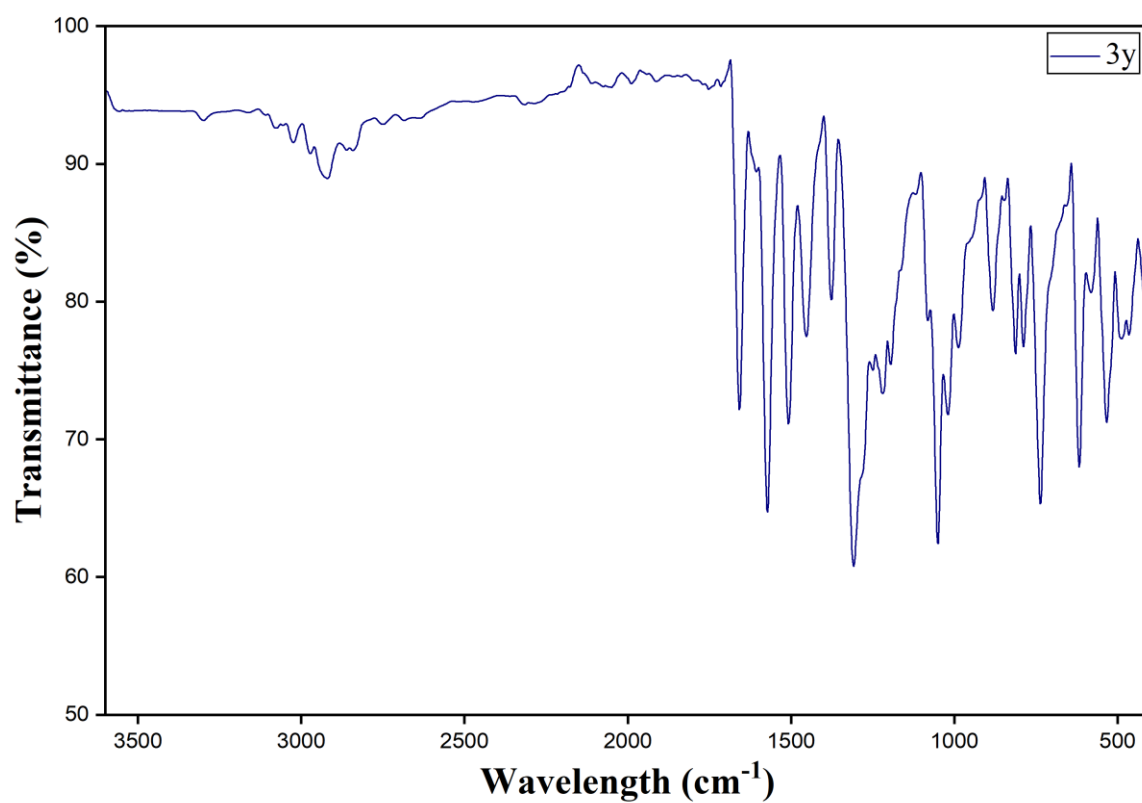



<sup>1</sup>H NMR (400 MHz, CDCl<sub>3</sub>)

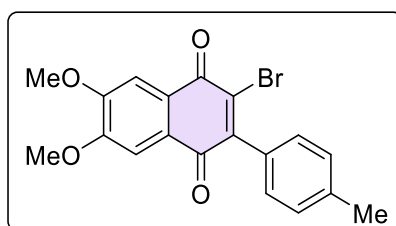

2-bromo-6,7-dimethoxy-3-(*p*-tolyl)naphthalene-1,4-dione (3y)

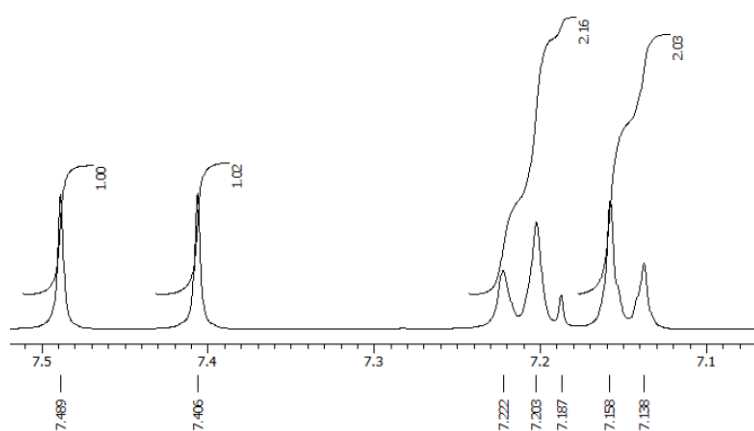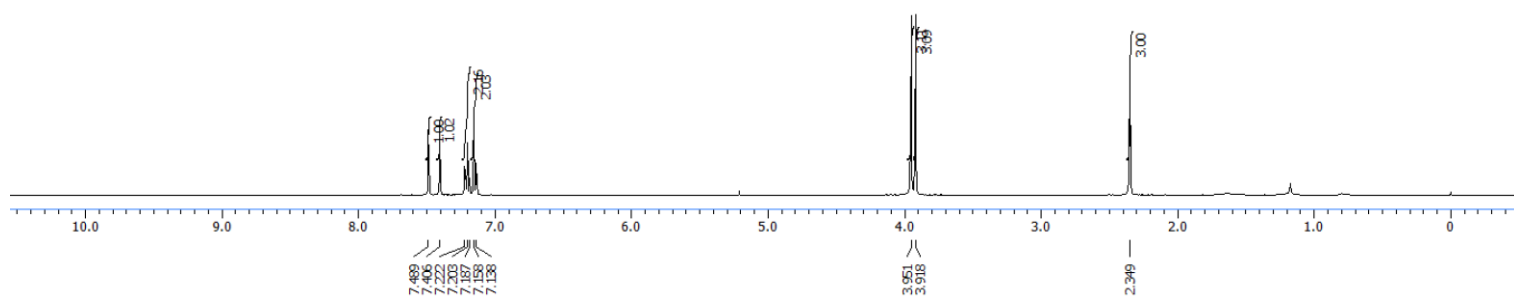

$^{13}\text{C}\{^1\text{H}\}$  NMR (100 MHz,  $\text{CDCl}_3$ )

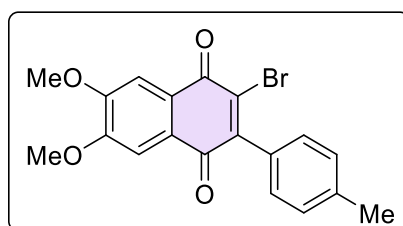

2-bromo-6,7-dimethoxy-3-(*p*-tolyl)naphthalene-1,4-dione (3y)

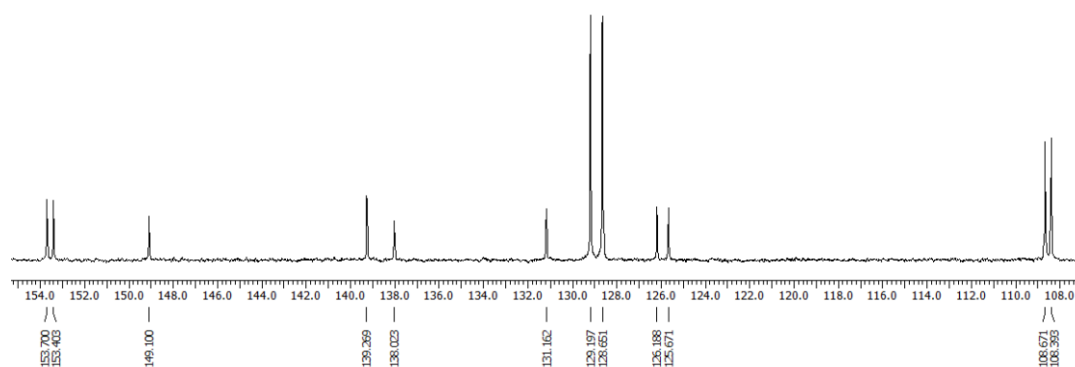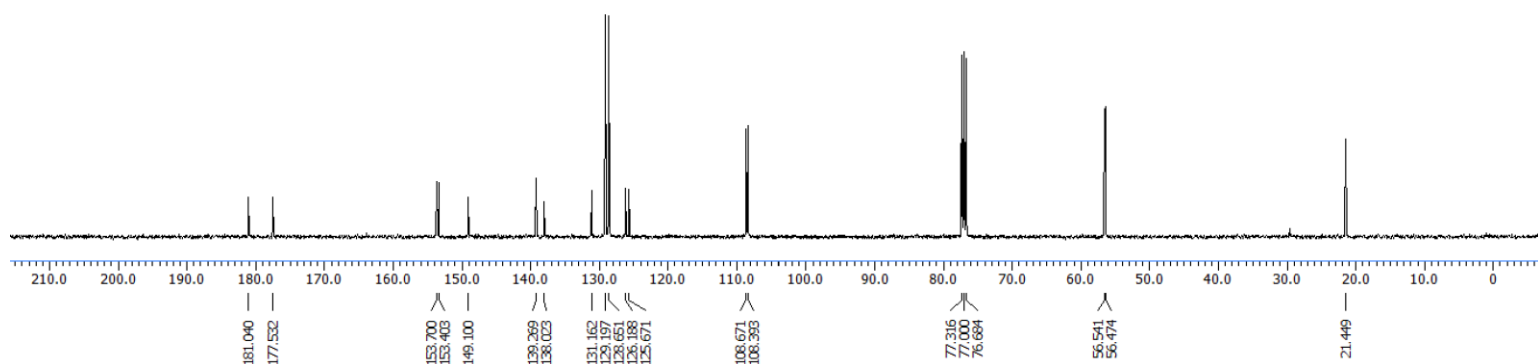

# HRMS

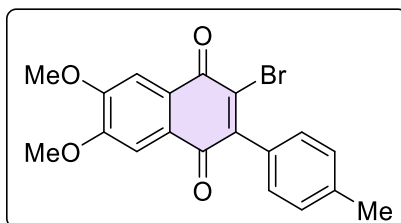

2-bromo-6,7-dimethoxy-3-(*p*-tolyl)naphthalene-1,4-dione (3y)

## Qualitative Compound Report

Data File: MNS-327.d  
 Sample Type: Sample  
 Instrument Name: Instrument 1  
 Acq Method: MS Scan.m  
 IRM Calibration Status: Success  
 Comment:  
 Sample Name: MNS-326  
 Position: PI-A1  
 User Name: HP-PC/Admin  
 Acquired Time: 31-01-2025 15:14:10  
 DA Method: Default.m

Sample Group: Info.  
 Acquisition SW: 6200 series TOF/6500 series  
 Version: Q-TOF B.05.01 (05125)

### Compound Table

| Compound Label       | RT    | Mass     | Abund | Formula       | Tgt Mass | Diff (ppm) | MFG Formula   | DB Formula    |
|----------------------|-------|----------|-------|---------------|----------|------------|---------------|---------------|
| Cpd 1: C19 H15 Br O4 | 0.151 | 386.0183 | 12551 | C19 H15 Br O4 | 386.0154 | 7.49       | C19 H15 Br O4 | C19 H15 Br O4 |

| Compound Label       | m/z     | RT    | Algorithm       | Mass     |
|----------------------|---------|-------|-----------------|----------|
| Cpd 1: C19 H15 Br O4 | 389.023 | 0.151 | Find by Formula | 386.0183 |

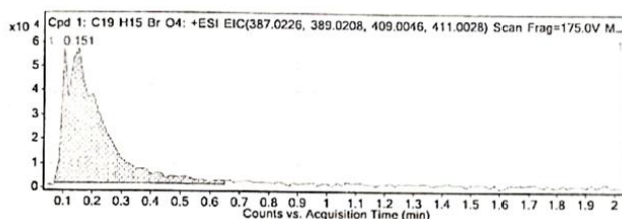

### MS Spectrum

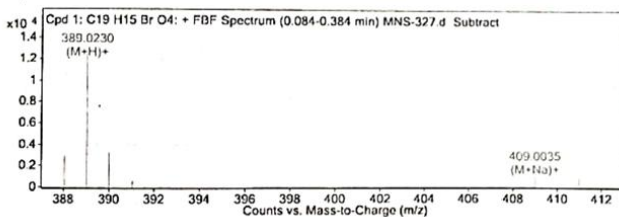

### MS Zoomed Spectrum

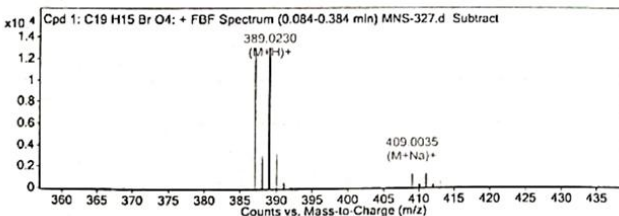

### MS Spectrum Peak List

| m/z      | z | Abund    | Formula      | Ion     |
|----------|---|----------|--------------|---------|
| 387.0252 | 1 | 12527.12 | C19H16BrO4   | (M+H)+  |
| 388.0291 | 1 | 3009.36  | C19H16BrO4   | (M+H)+  |
| 389.023  | 1 | 12550.58 | C19H16BrO4   | (M+H)+  |
| 390.0277 | 1 | 3206.66  | C19H16BrO4   | (M+H)+  |
| 391.0329 | 1 | 569.2    | C19H16BrO4   | (M+H)+  |
| 409.0035 | 1 | 914.87   | C19H15BrNaO4 | (M+Na)+ |
| 410.0098 | 1 | 224.33   | C19H15BrNaO4 | (M+Na)+ |
| 411.01   | 1 | 898.98   | C19H15BrNaO4 | (M+Na)+ |
| 412.0176 | 1 | 239.31   | C19H15BrNaO4 | (M+Na)+ |
| 413.025  | 1 | 567.53   | C19H15BrNaO4 | (M+Na)+ |

--- End Of Report ---

## IR Spectra

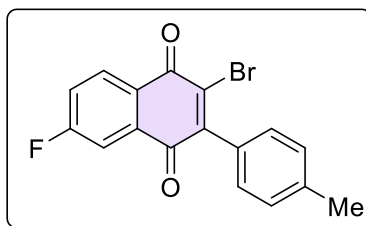

**2-bromo-6-fluoro-3-(*p*-tolyl)naphthalene-1,4-dione (3z)**

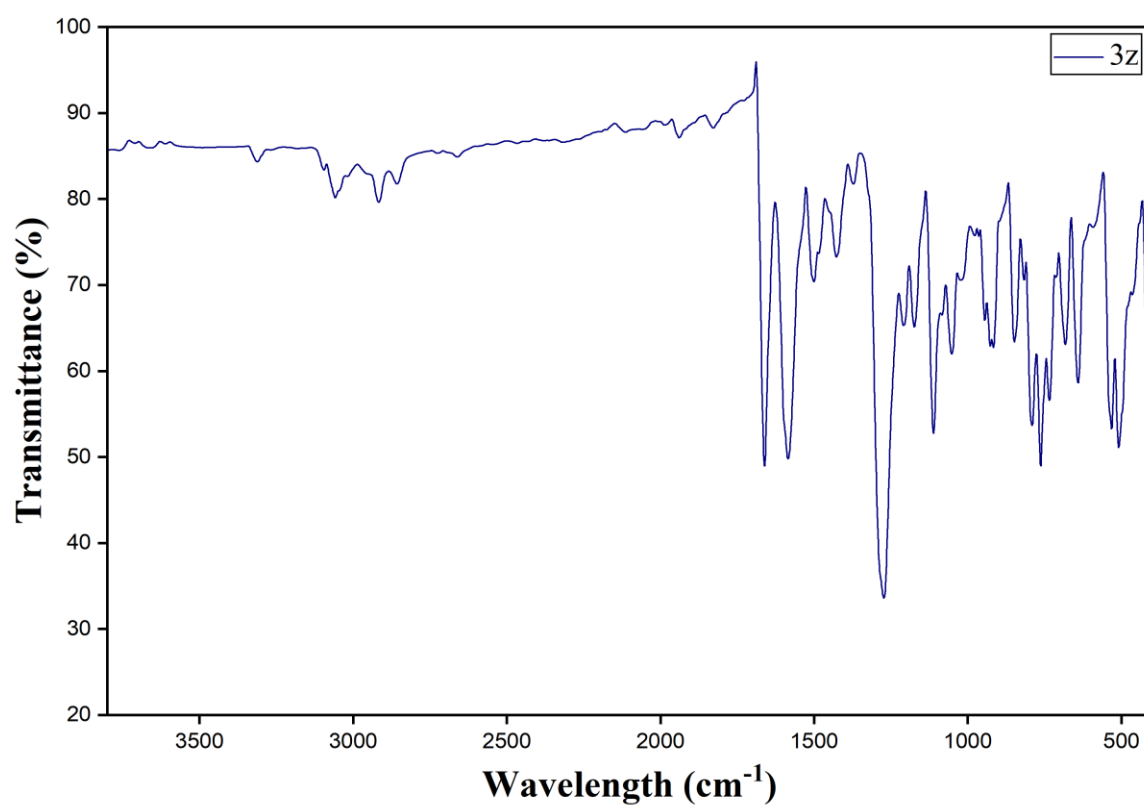

<sup>1</sup>H NMR (400 MHz, CDCl<sub>3</sub>)

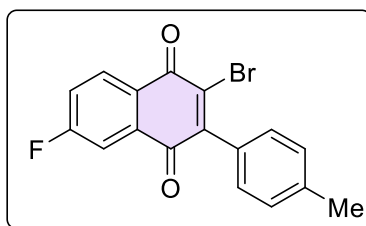

**2-bromo-6-fluoro-3-(*p*-tolyl)naphthalene-1,4-dione (3z)**

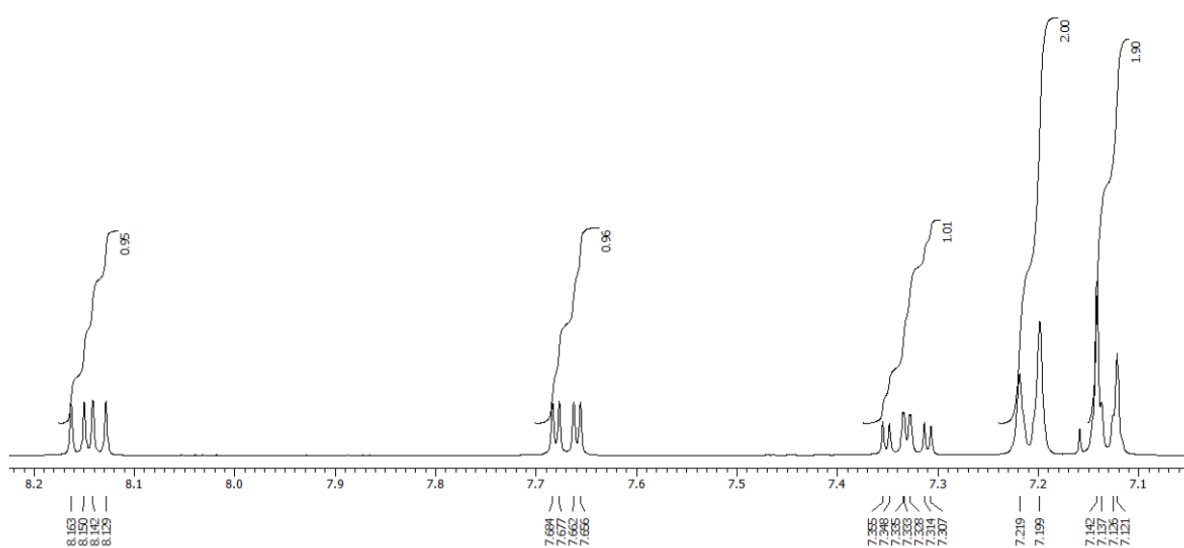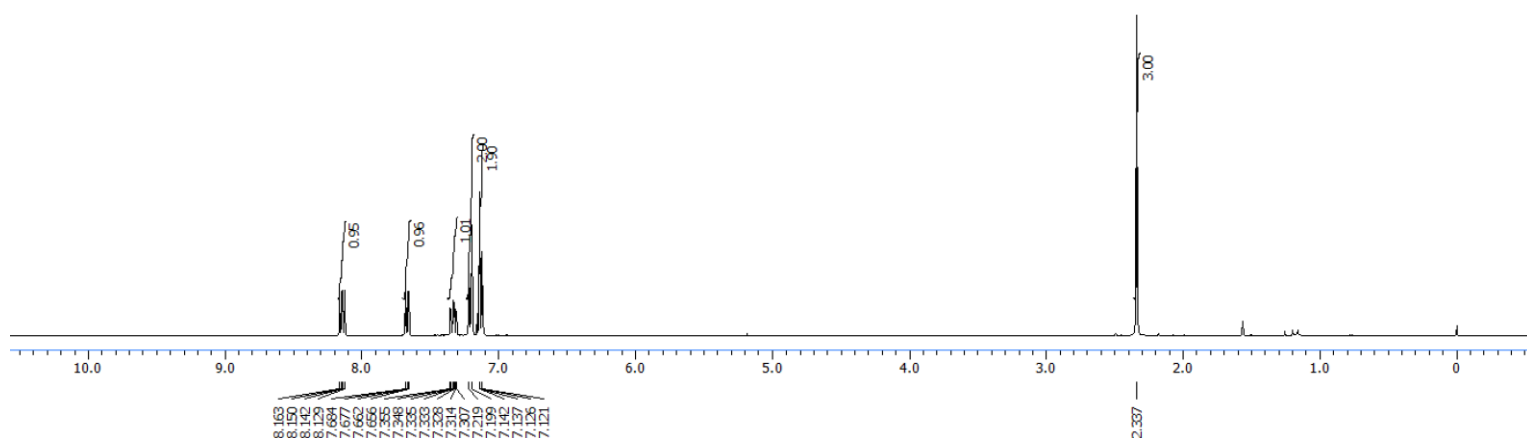

$^{13}\text{C}\{^1\text{H}\}$  NMR (100 MHz,  $\text{CDCl}_3$ )

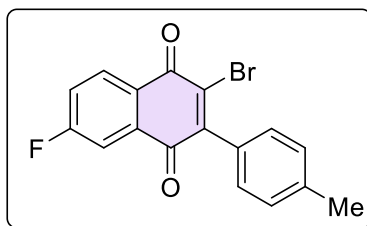

**2-bromo-6-fluoro-3-(*p*-tolyl)naphthalene-1,4-dione (3z)**

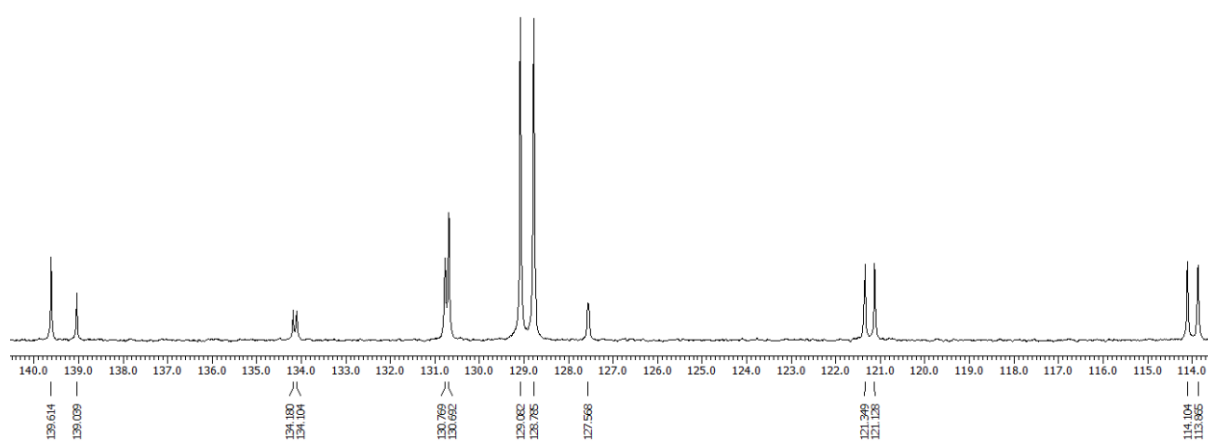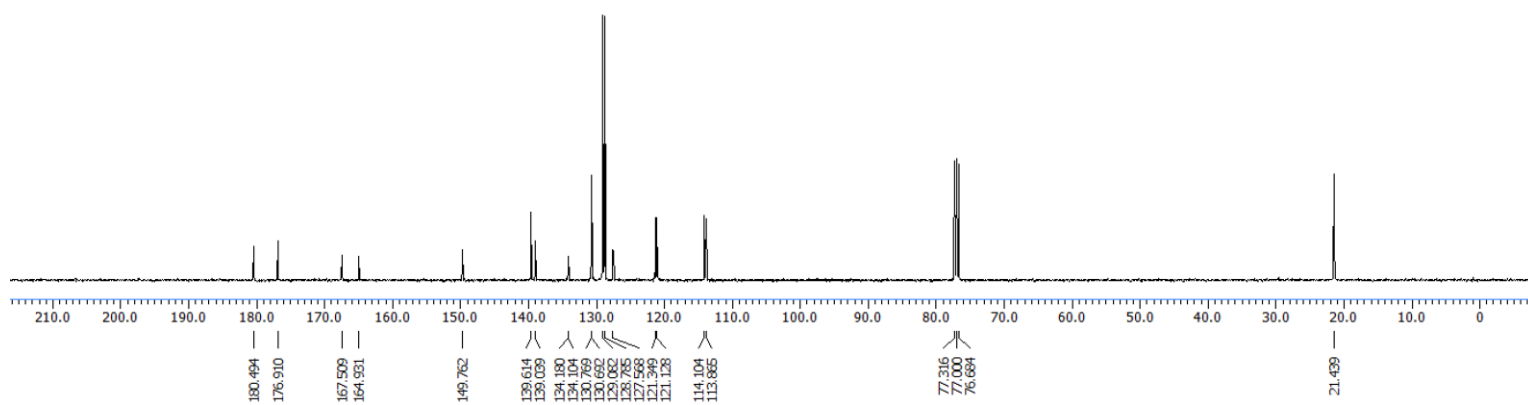

**$^{19}\text{F}$  NMR (376 MHz,  $\text{CDCl}_3$ )**



**2-bromo-6-fluoro-3-(*p*-tolyl)naphthalene-1,4-dione (3z)**

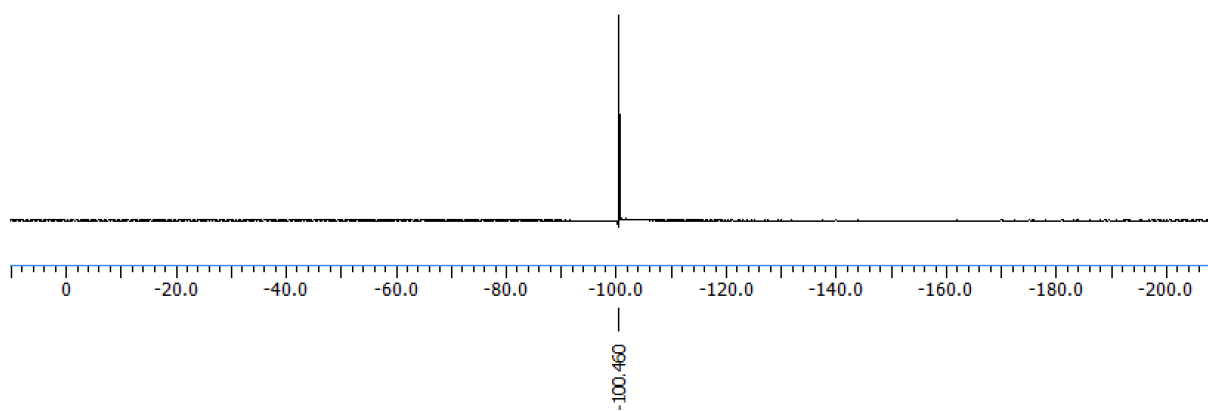

# HRMS

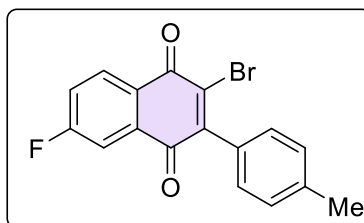

**2-bromo-6-fluoro-3-(p-tolyl)naphthalene-1,4-dione (3z)**

## Qualitative Compound Report

Data File: MNS-343.d  
Sample Type: Sample  
Instrument Name: Instrument 1  
Acq Method: MS Scan.m  
IRM Calibration Status: Success  
Comment: DA Method: Default.m

Sample Group: Info. 3  
Acquisition SW: 6200 series TOF/6500 series  
Version: Q-TOF B.05.01 (B5125)

### Compound Table

| Compound Label         | RT    | Mass     | Abund | Formula         | Tgt Mass | Diff (ppm) | MFG Formula     | DB Formula      |
|------------------------|-------|----------|-------|-----------------|----------|------------|-----------------|-----------------|
| Cpd 1: C17 H10 Br F O2 | 0.154 | 343.9851 | 32198 | C17 H10 Br F O2 | 343.9848 | 0.91       | C17 H10 Br F O2 | C17 H10 Br F O2 |

| Compound Label         | m/z      | RT    | Algorithm       | Mass     |
|------------------------|----------|-------|-----------------|----------|
| Cpd 1: C17 H10 Br F O2 | 344.9924 | 0.154 | Find By Formula | 343.9851 |

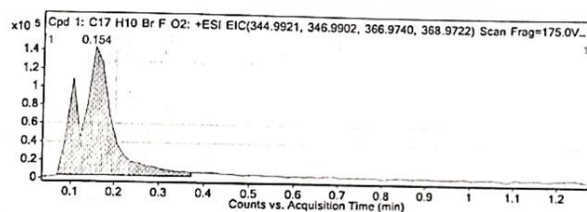

### MS Spectrum

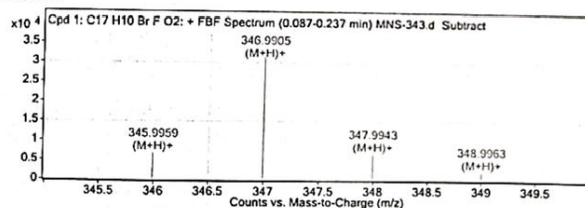

### MS Zoomed Spectrum

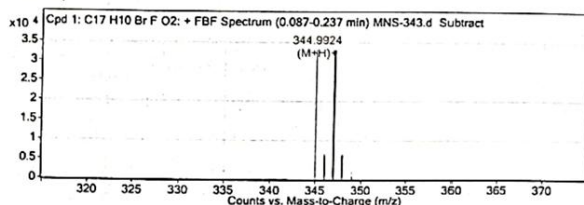

### MS Spectrum Peak List

| m/z      | z | Abund    | Formula     | Ion    |
|----------|---|----------|-------------|--------|
| 344.9924 | 1 | 32197.95 | C17H11BrFO2 | (M+H)+ |
| 345.9959 | 1 | 6764.91  | C17H11BrFO2 | (M+H)+ |
| 346.9905 | 1 | 31816.02 | C17H11BrFO2 | (M+H)+ |
| 347.9943 | 1 | 6577.36  | C17H11BrFO2 | (M+H)+ |
| 348.9963 | 1 | 2117.14  | C17H11BrFO2 | (M+H)+ |
| 349.9919 | 1 | 78.84    | C17H11BrFO2 | (M+H)+ |

--- End Of Report ---



## IR Spectra

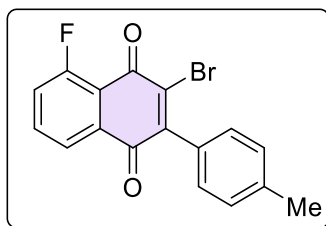

**3-bromo-5-fluoro-2-(p-tolyl)naphthalene-1,4-dione (3aa)**

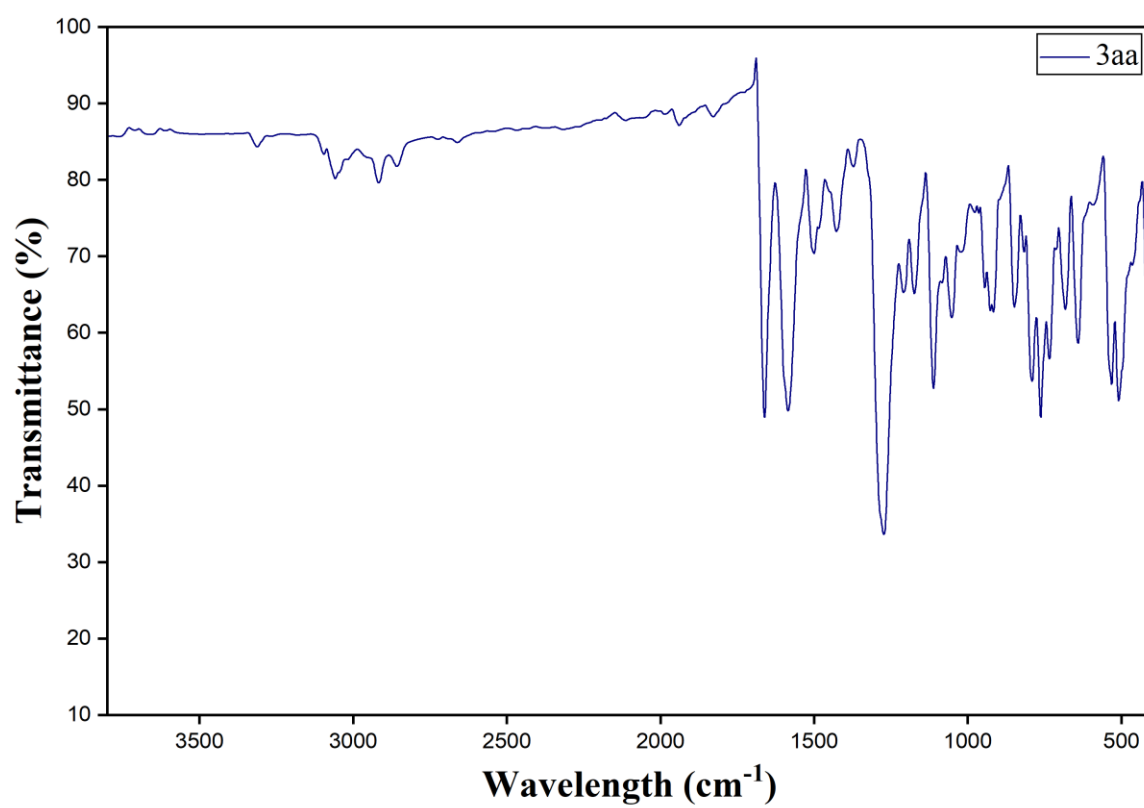

<sup>1</sup>H NMR (400 MHz, CDCl<sub>3</sub>)

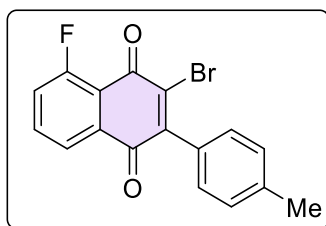

**3-bromo-5-fluoro-2-(p-tolyl)naphthalene-1,4-dione (3aa)**

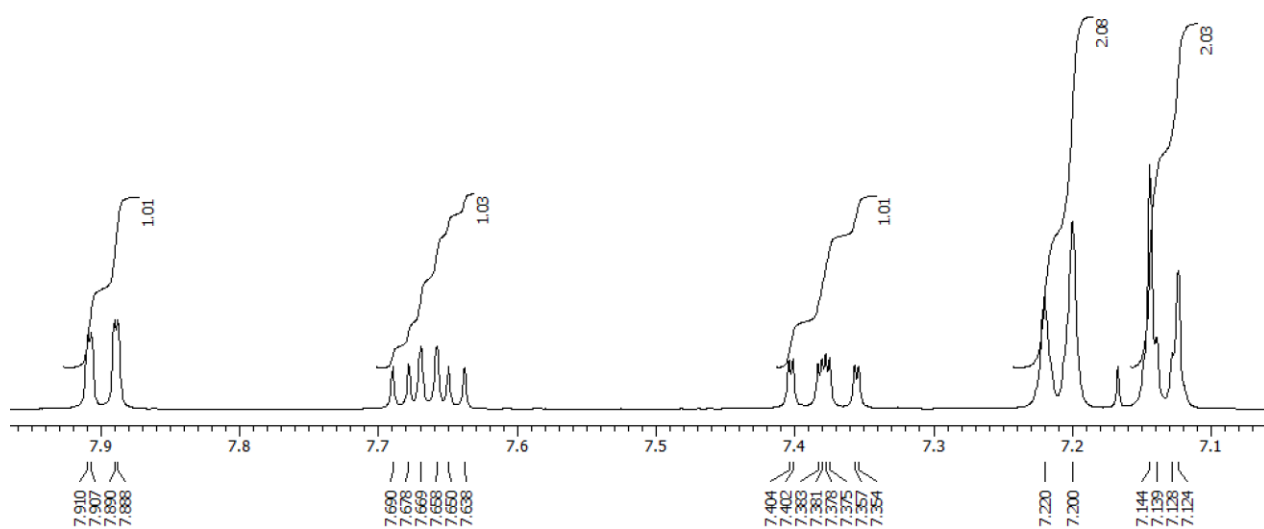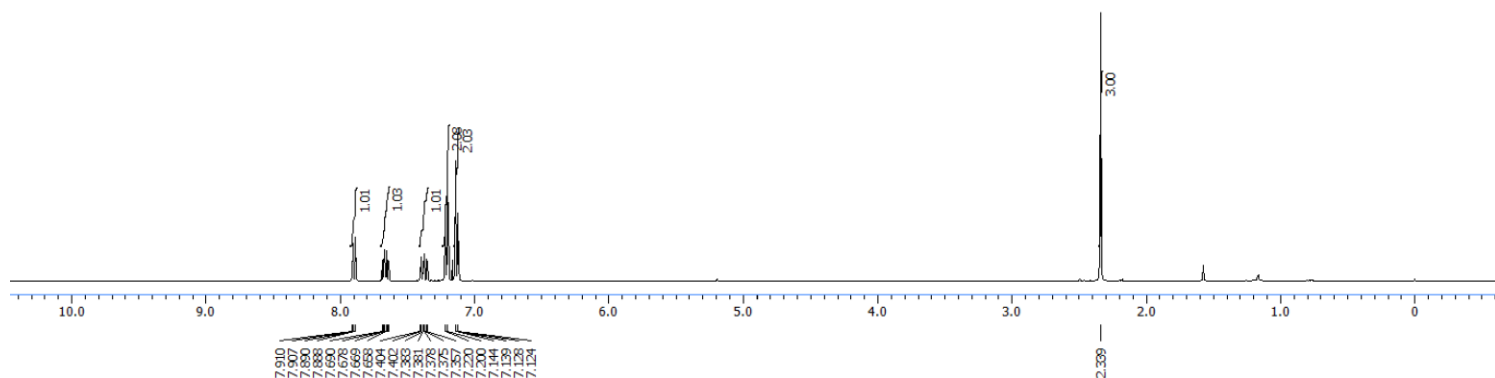

$^{13}\text{C}\{^1\text{H}\}$  NMR (100 MHz,  $\text{CDCl}_3$ )



**3-bromo-5-fluoro-2-(*p*-tolyl)naphthalene-1,4-dione (3aa)**

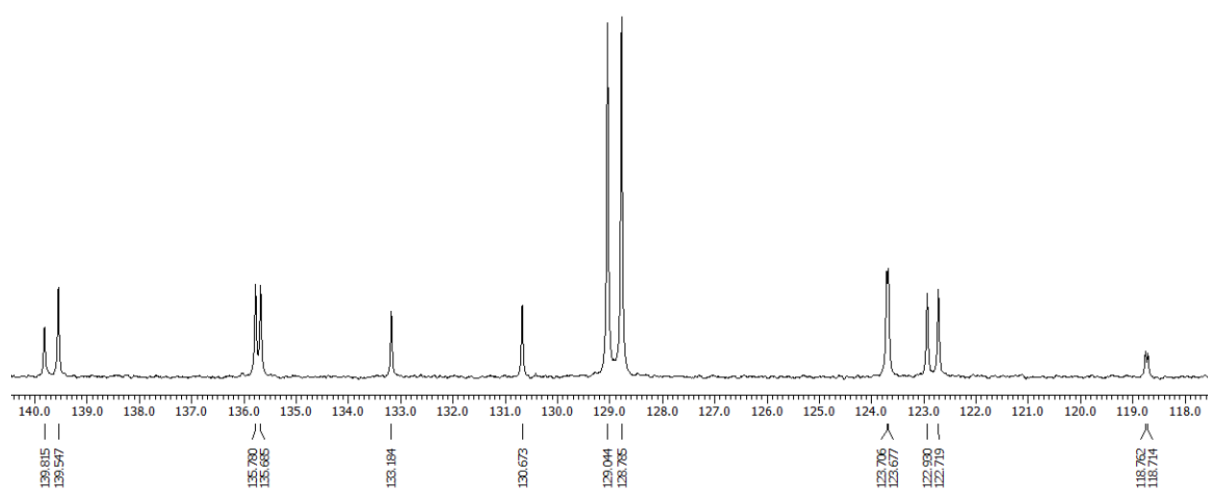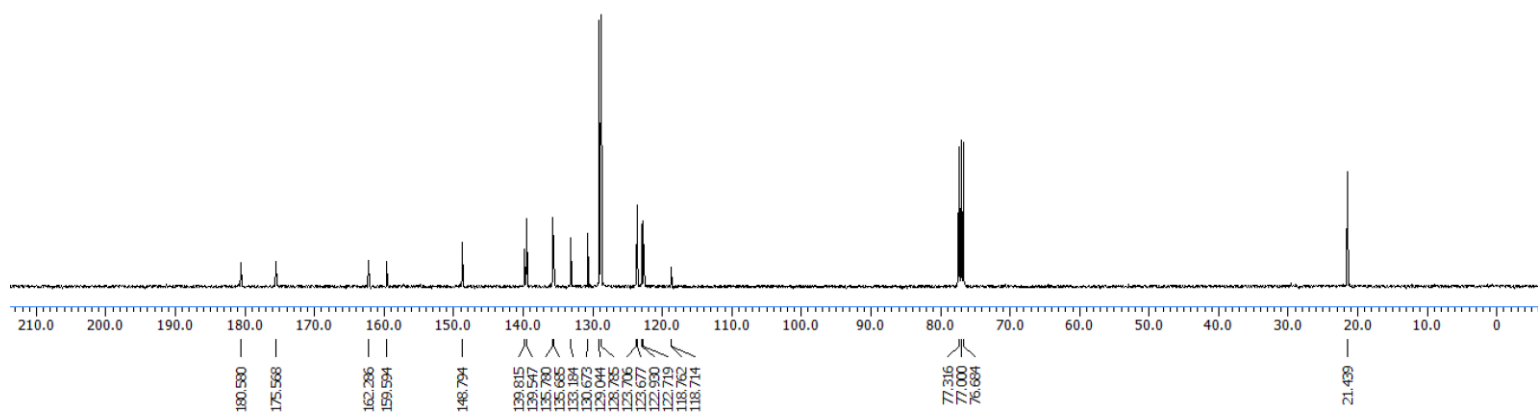

**$^{19}\text{F}$  NMR (376 MHz,  $\text{CDCl}_3$ )**



**3-bromo-5-fluoro-2-(p-tolyl)naphthalene-1,4-dione (3aa)**

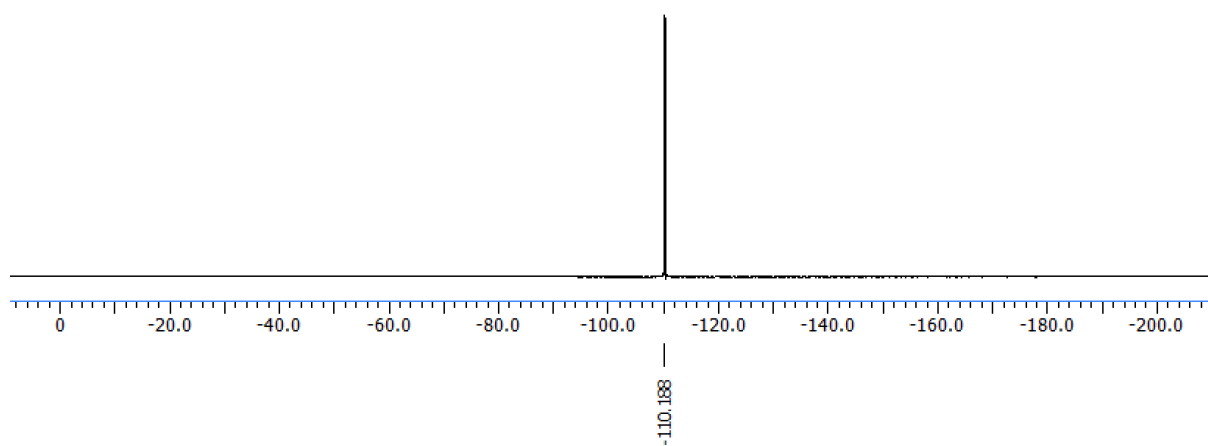

# HRMS

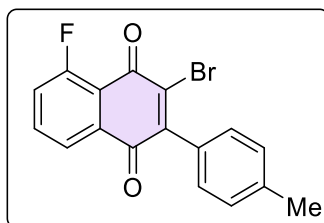

**3-bromo-5-fluoro-2-(p-tolyl)naphthalene-1,4-dione (3aa)**

## Qualitative Compound Report

Data File: MNS-343.d  
Sample Type: Sample  
Instrument Name: Instrument 1  
Acq Method: MS Scan.m  
IRM Calibration Status: Success  
Comment: DA Method: Default.m

Sample Group: Info. 3  
Acquisition SW: 6200 series TOF/6500 series  
Version: Q-TOF B.05.01 (B5125)

### Compound Table

| Compound Label         | RT    | Mass     | Abund | Formula         | Tgt Mass | Diff (ppm) | MFG Formula     | DB Formula      |
|------------------------|-------|----------|-------|-----------------|----------|------------|-----------------|-----------------|
| Cpd 1: C17 H10 Br F O2 | 0.154 | 343.9851 | 32198 | C17 H10 Br F O2 | 343.9848 | 0.91       | C17 H10 Br F O2 | C17 H10 Br F O2 |

| Compound Label         | m/z      | RT    | Algorithm       | Mass     |
|------------------------|----------|-------|-----------------|----------|
| Cpd 1: C17 H10 Br F O2 | 344.9924 | 0.154 | Find By Formula | 343.9851 |

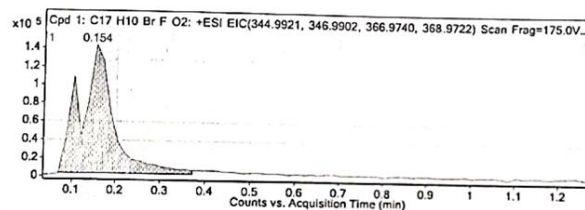

### MS Spectrum

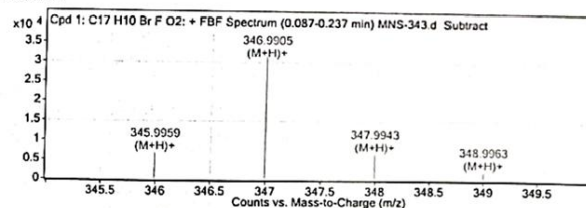

### MS Zoomed Spectrum

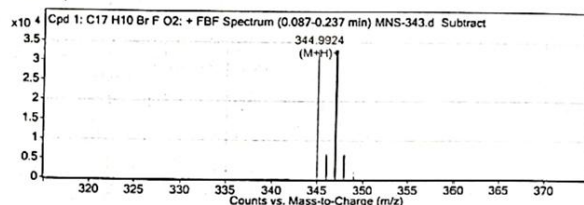

### MS Spectrum Peak List

| m/z      | z | Abund    | Formula     | Ion    |
|----------|---|----------|-------------|--------|
| 344.9924 | 1 | 32197.95 | C17H11BrFO2 | (M+H)+ |
| 345.9959 | 1 | 6764.91  | C17H11BrFO2 | (M+H)+ |
| 346.9905 | 1 | 31816.02 | C17H11BrFO2 | (M+H)+ |
| 347.9943 | 1 | 6577.36  | C17H11BrFO2 | (M+H)+ |
| 348.9963 | 1 | 2117.14  | C17H11BrFO2 | (M+H)+ |
| 349.9919 | 1 | 78.84    | C17H11BrFO2 | (M+H)+ |

--- End Of Report ---

## IR Spectra

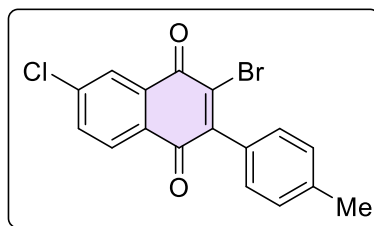

**3-bromo-6-chloro-2-(*p*-tolyl)naphthalene-1,4-dione (3ab)**

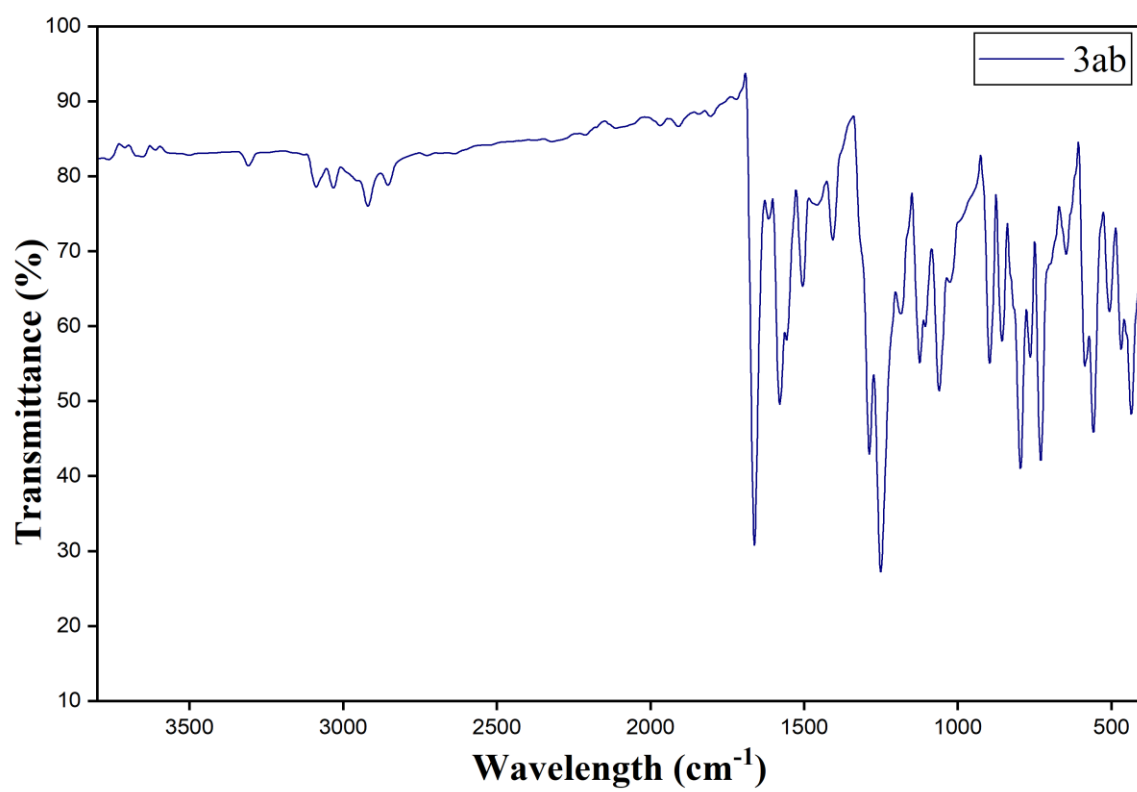

<sup>1</sup>H NMR (400 MHz, CDCl<sub>3</sub>)

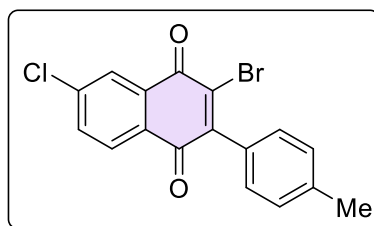

**3-bromo-6-chloro-2-(*p*-tolyl)naphthalene-1,4-dione (3ab)**

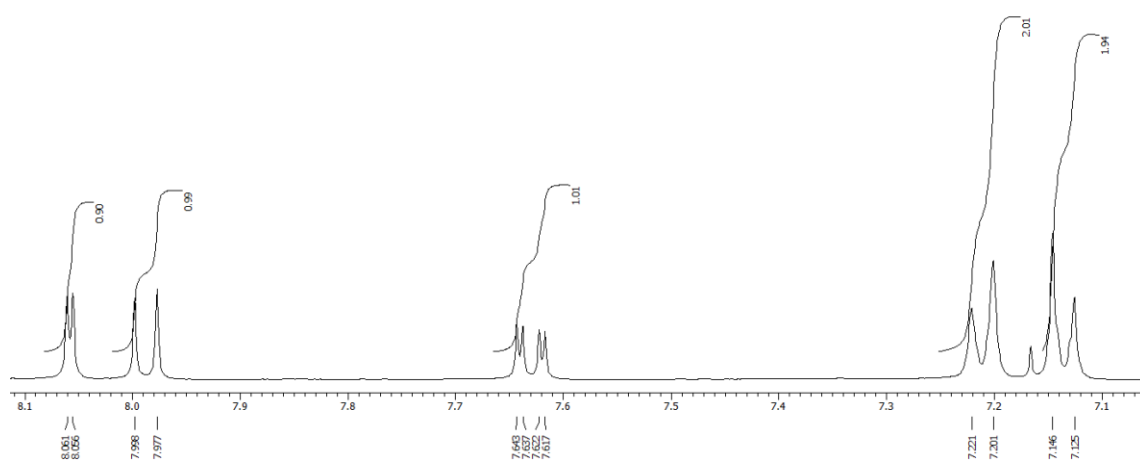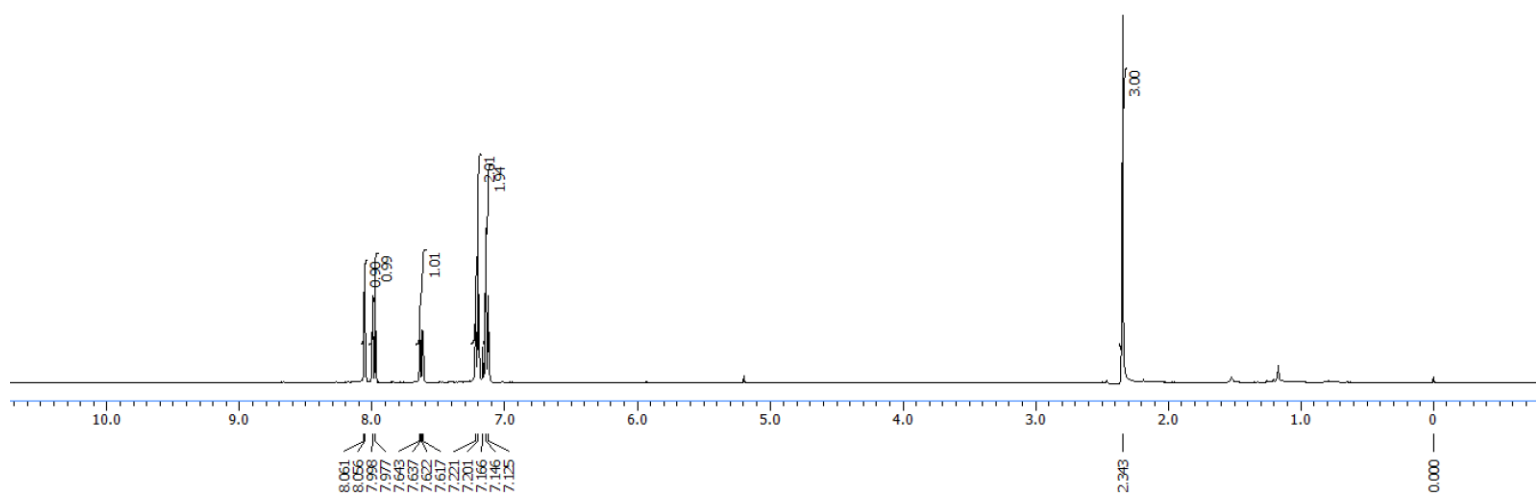

$^{13}\text{C}\{^1\text{H}\}$  NMR (100 MHz,  $\text{CDCl}_3$ )



**3-bromo-6-chloro-2-(*p*-tolyl)naphthalene-1,4-dione (3ab)**

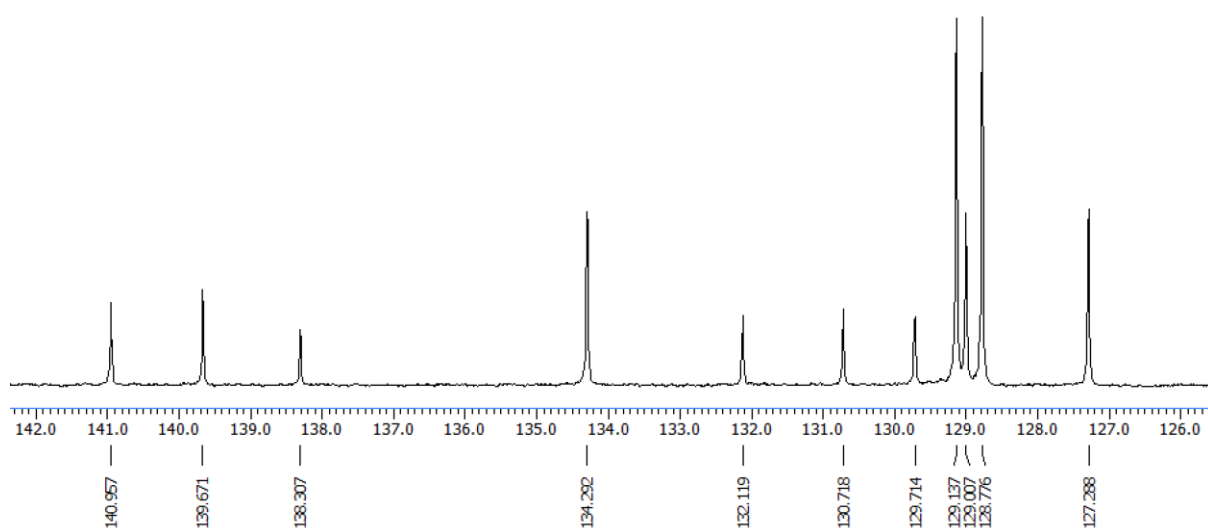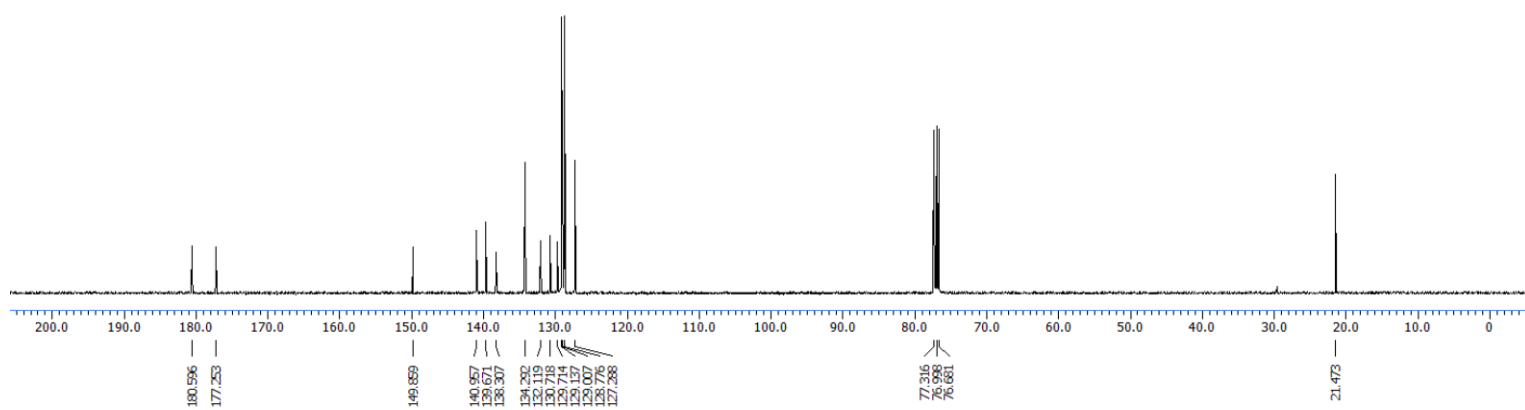



# HRMS

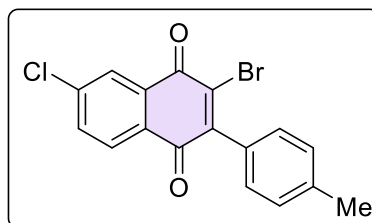

**3-bromo-6-chloro-2-(*p*-tolyl)naphthalene-1,4-dione (3ab)**

## Qualitative Compound Report

Data File: MNS-305.d  
Sample Type: Sample  
Instrument Name: Instrument 1  
Acq Method: MS Scan.m  
IRM Calibration Status: Success  
Comment:   
Sample Group:   
Acquisition SW: 6200 series TOF/6500 series  
Version: Q-TOF B.05.01 (B5125)  
Sample Name: MNS-305  
Position: P1-06  
User Name:   
Acquired Time: 20 05 2024 14:01:35  
DA Method: Default.m  
Info: 3

### Compound Table

| Compound Label          | RT    | Mass     | Abund | Formula          | Tgt Mass | Diff (ppm) | MFG Formula      | DB Formula       |
|-------------------------|-------|----------|-------|------------------|----------|------------|------------------|------------------|
| Cpd 1: C17 H10 Br Cl O2 | 0.351 | 359.9568 | 1511  | C17 H10 Br Cl O2 | 359.9553 | 4.77       | C17 H10 Br Cl O2 | C17 H10 Br Cl O2 |

| Compound Label          | m/z      | RT    | Algorithm       | Mass     |
|-------------------------|----------|-------|-----------------|----------|
| Cpd 1: C17 H10 Br Cl O2 | 362.9637 | 0.351 | Find By Formula | 359.9568 |

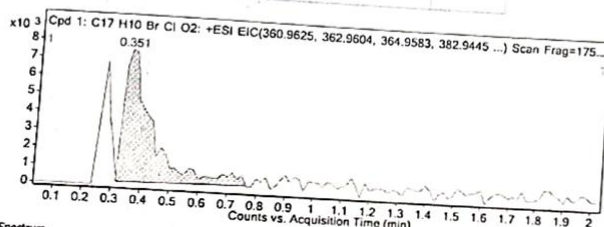

### MS Spectrum

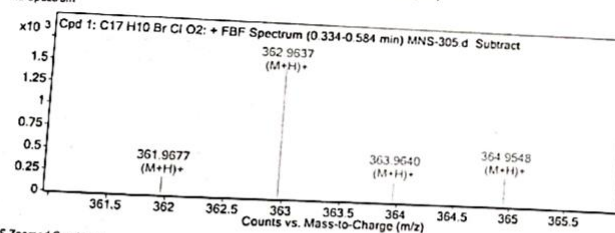

### MS Zoomed Spectrum

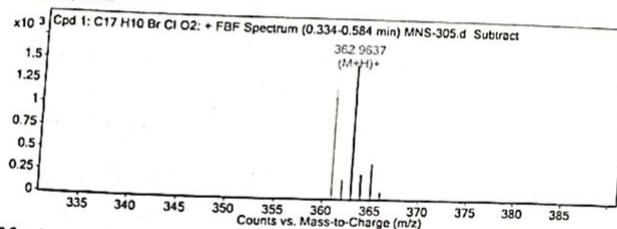

### MS Spectrum Peak List

| m/z      | z | Abund   | Formula      | Ion    |
|----------|---|---------|--------------|--------|
| 360.9635 | 1 | 1234.87 | C17H11BrClO2 | (M+H)+ |
| 361.9677 | 1 | 209.45  | C17H11BrClO2 | (M+H)+ |
| 362.9637 | 1 | 1511.33 | C17H11BrClO2 | (M+H)+ |
| 363.964  | 1 | 247.96  | C17H11BrClO2 | (M+H)+ |
| 364.9548 | 1 | 337.53  | C17H11BrClO2 | (M+H)+ |
| 365.9613 | 1 | 24.17   | C17H11BrClO2 | (M+H)+ |

--- End Of Report ---

## IR Spectra

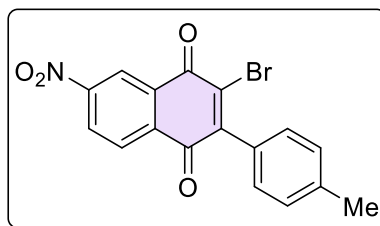

**3-bromo-6-nitro-2-(*p*-tolyl)naphthalene-1,4-dione (3ac)**

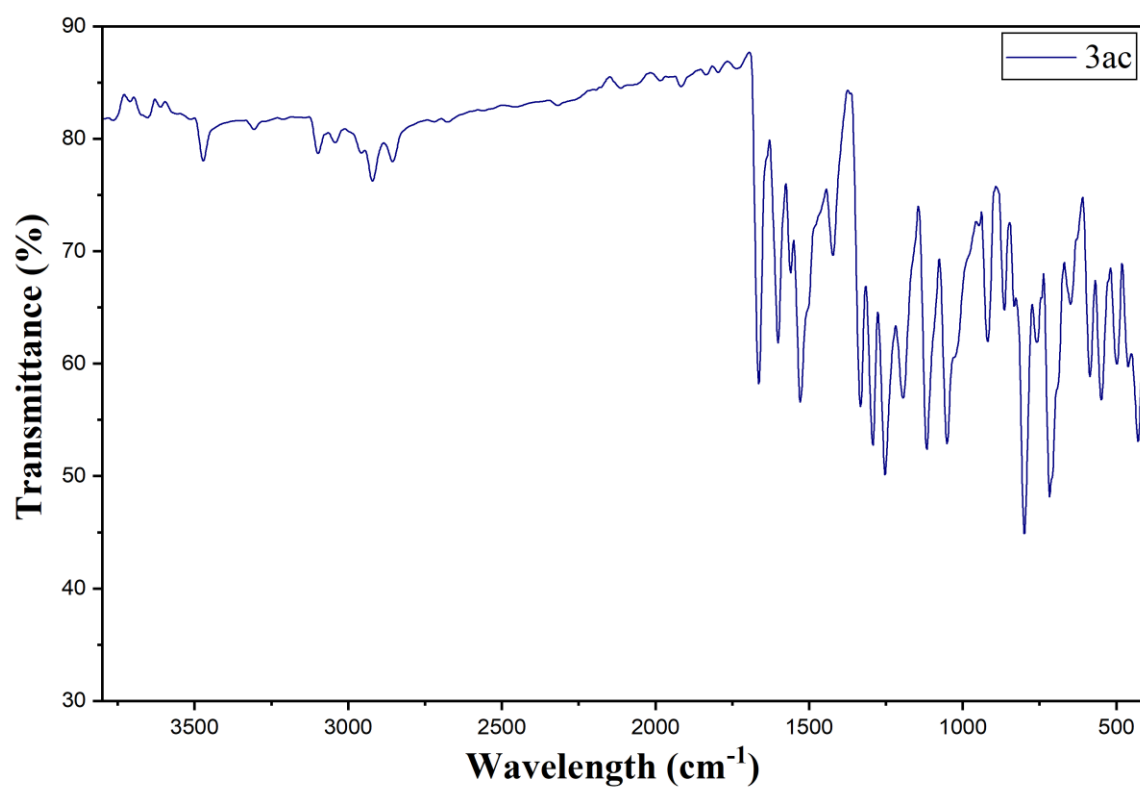

<sup>1</sup>H NMR (400 MHz, CDCl<sub>3</sub>)

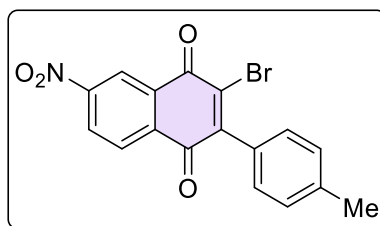

**3-bromo-6-nitro-2-(*p*-tolyl)naphthalene-1,4-dione (3ac)**

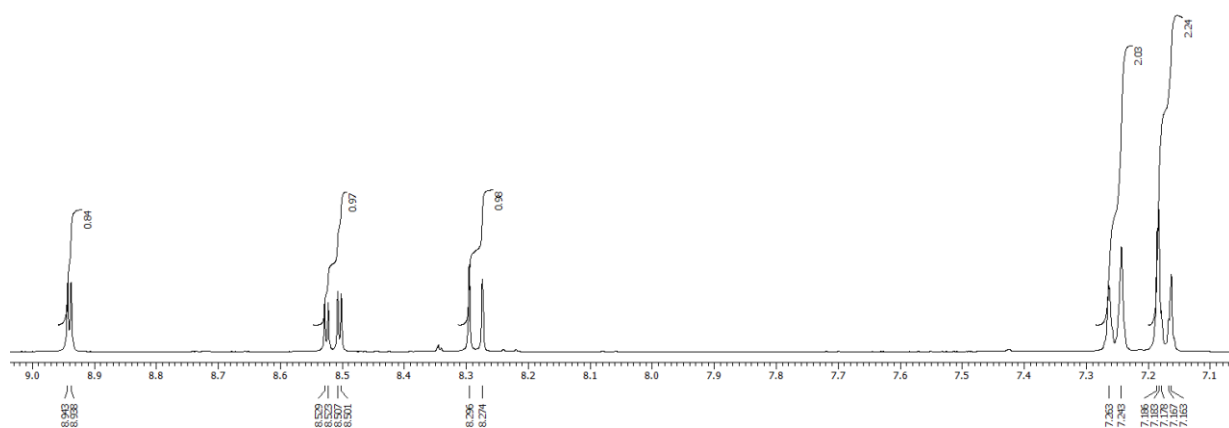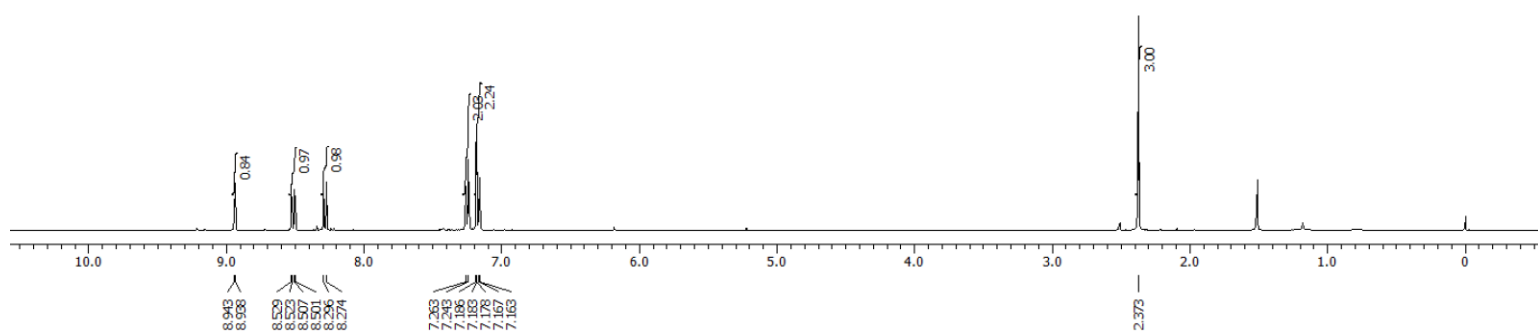

$^{13}\text{C}\{^1\text{H}\}$  NMR (100 MHz,  $\text{CDCl}_3$ )

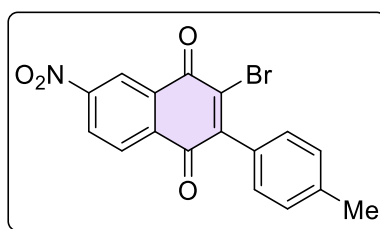

**3-bromo-6-nitro-2-(*p*-tolyl)naphthalene-1,4-dione (3ac)**

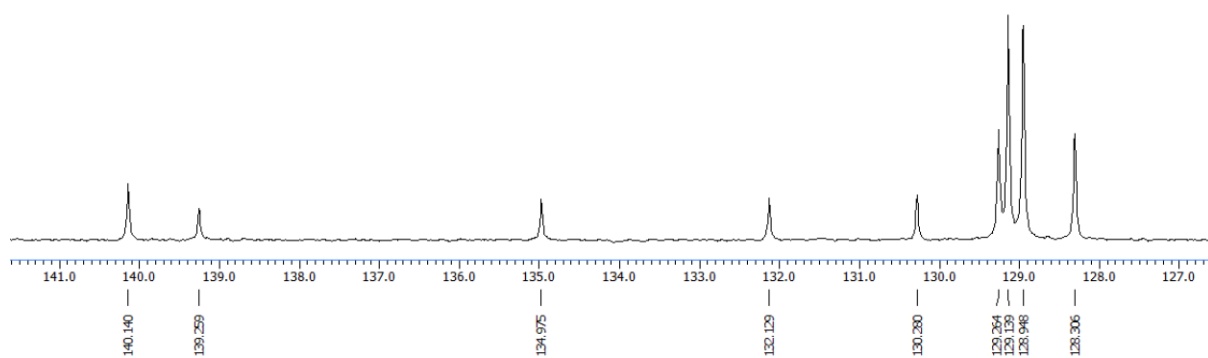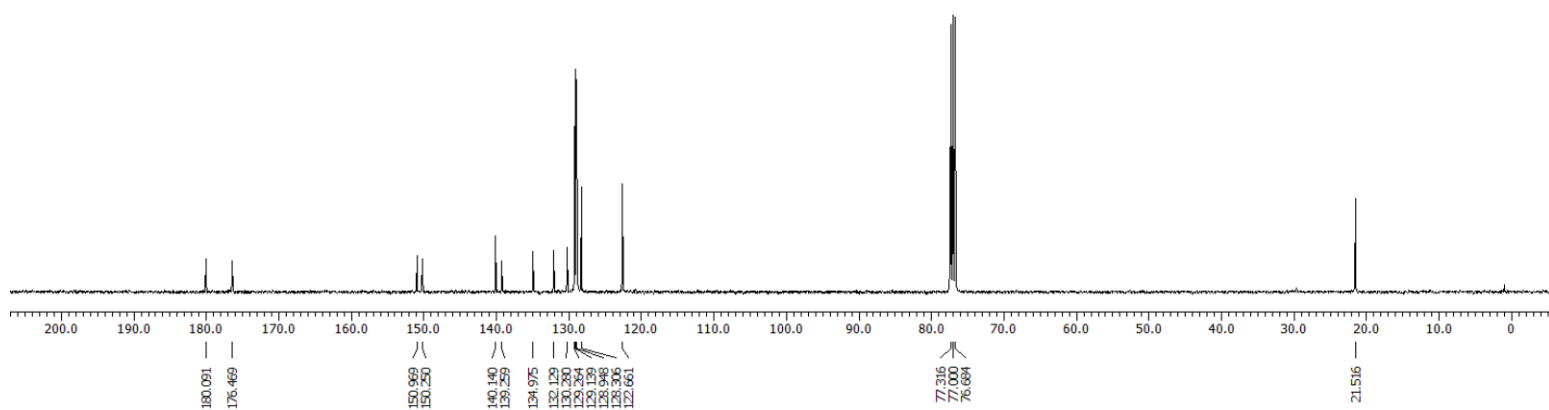

# HRMS

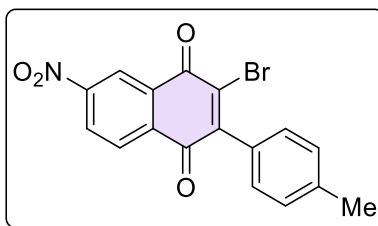

**3-bromo-6-nitro-2-(p-tolyl)naphthalene-1,4-dione (3ac)**

## Qualitative Compound Report

Data File: MNS-352.d  
Sample Type: Sample  
Instrument Name: Instrument 1  
Acq Method: MS Scan.m  
IRM Calibration Status: Success  
Comment:

Sample Name: MNS-352  
Position: P1-09  
User Name:  
Acquired Time: 08-03-2025 12:45:09  
DA Method: Default.m

Sample Group: Info. 3  
Acquisition SW: 6200 series TOF/6500 series  
Version: Q-TOF B.05.01 (85125)

### Compound Table

| Compound Label         | RT    | Mass     | Abund | Formula         | Tgt Mass | Diff (ppm) | MFG Formula     | DB Formula      |
|------------------------|-------|----------|-------|-----------------|----------|------------|-----------------|-----------------|
| Cpd 1: C17 H10 Br N O4 | 0.151 | 370.9807 | 13881 | C17 H10 Br N O4 | 370.9793 | 3.77       | C17 H10 Br N O4 | C17 H10 Br N O4 |

| Compound Label         | m/z      | RT    | Algorithm       | Mass     |
|------------------------|----------|-------|-----------------|----------|
| Cpd 1: C17 H10 Br N O4 | 371.9879 | 0.151 | Find By Formula | 370.9807 |

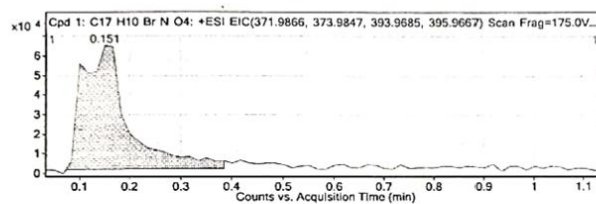

### MS Spectrum

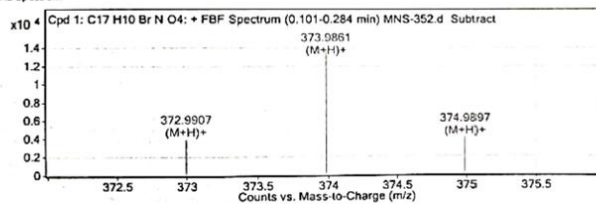

### MS Zoomed Spectrum

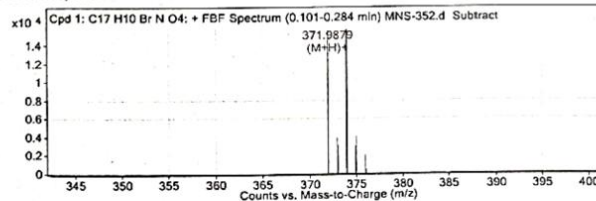

### MS Spectrum Peak List

| m/z      | z | Abund    | Formula     | Ion    |
|----------|---|----------|-------------|--------|
| 371.9879 | 1 | 13881.47 | C17H11BrNO4 | (M+H)+ |
| 372.9907 | 1 | 3959.85  | C17H11BrNO4 | (M+H)+ |
| 373.9861 | 1 | 13668.22 | C17H11BrNO4 | (M+H)+ |
| 374.9897 | 1 | 4041.41  | C17H11BrNO4 | (M+H)+ |
| 375.9928 | 1 | 2034.66  | C17H11BrNO4 | (M+H)+ |

--- End Of Report ---

## IR Spectra

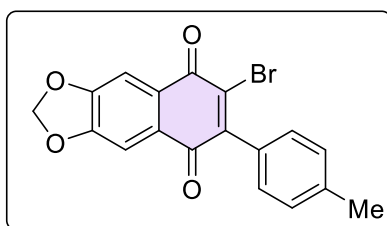

**6-bromo-7-(*p*-tolyl)naphtho[2,3-d][1,3]dioxole-5,8-dione (3ad)**

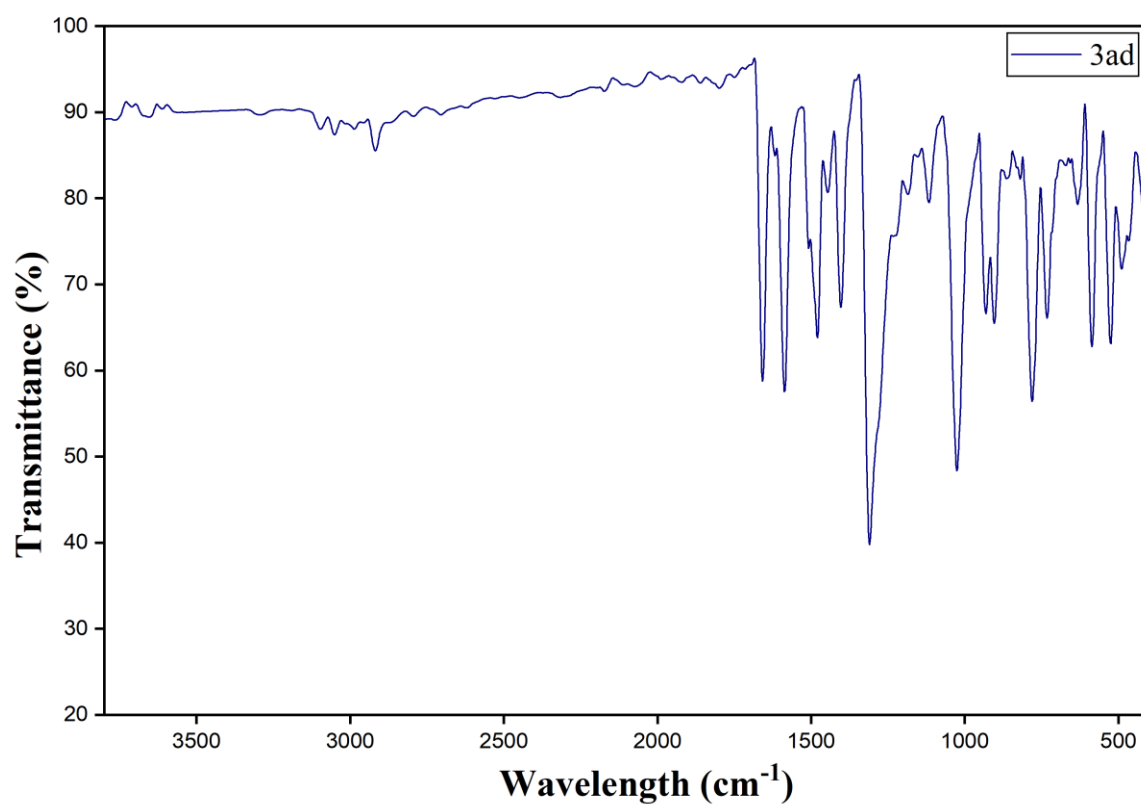

**<sup>1</sup>H NMR (400 MHz, CDCl<sub>3</sub>)**

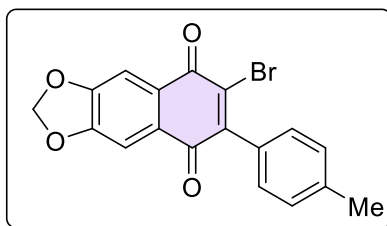

**6-bromo-7-(*p*-tolyl)naphtho[2,3-*d*][1,3]dioxole-5,8-dione (3ad)**

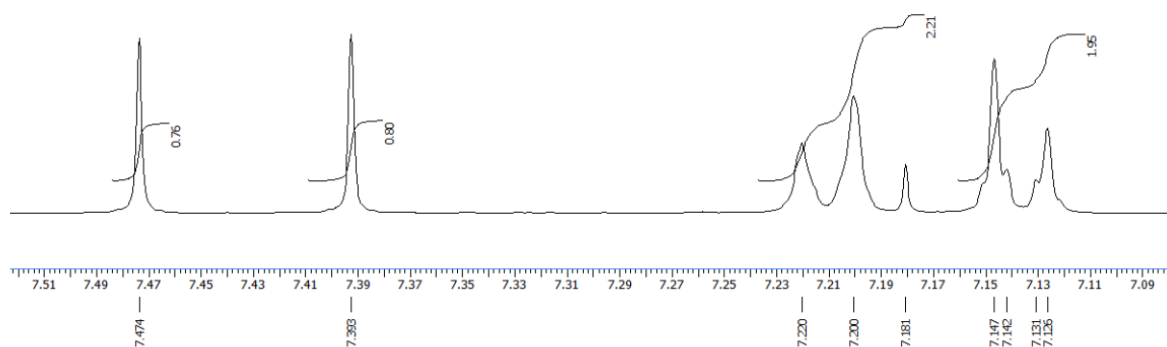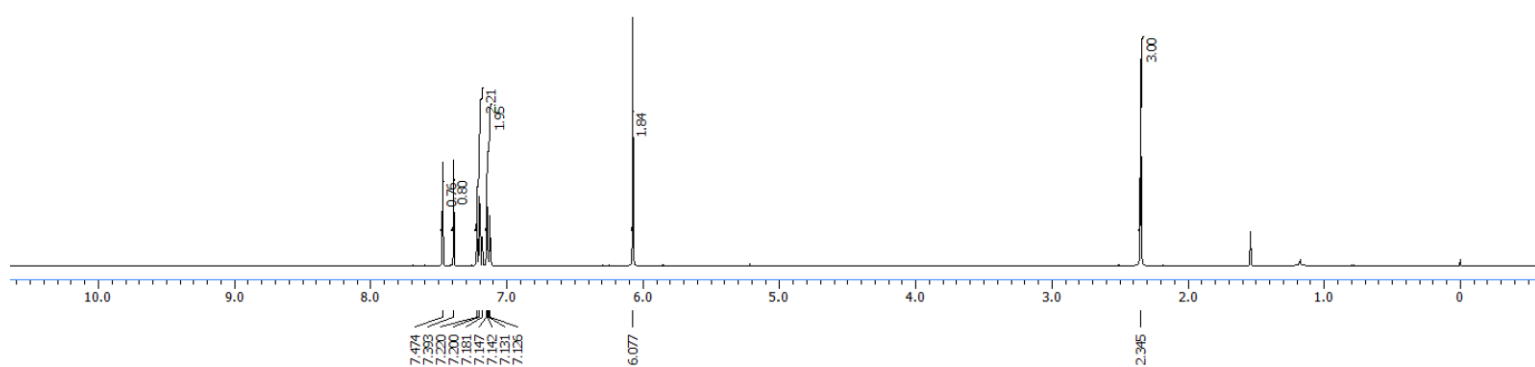

$^{13}\text{C}\{^1\text{H}\}$  NMR (100 MHz,  $\text{CDCl}_3$ )



**6-bromo-7-(*p*-tolyl)naphtho[2,3-d][1,3]dioxole-5,8-dione (3ad)**

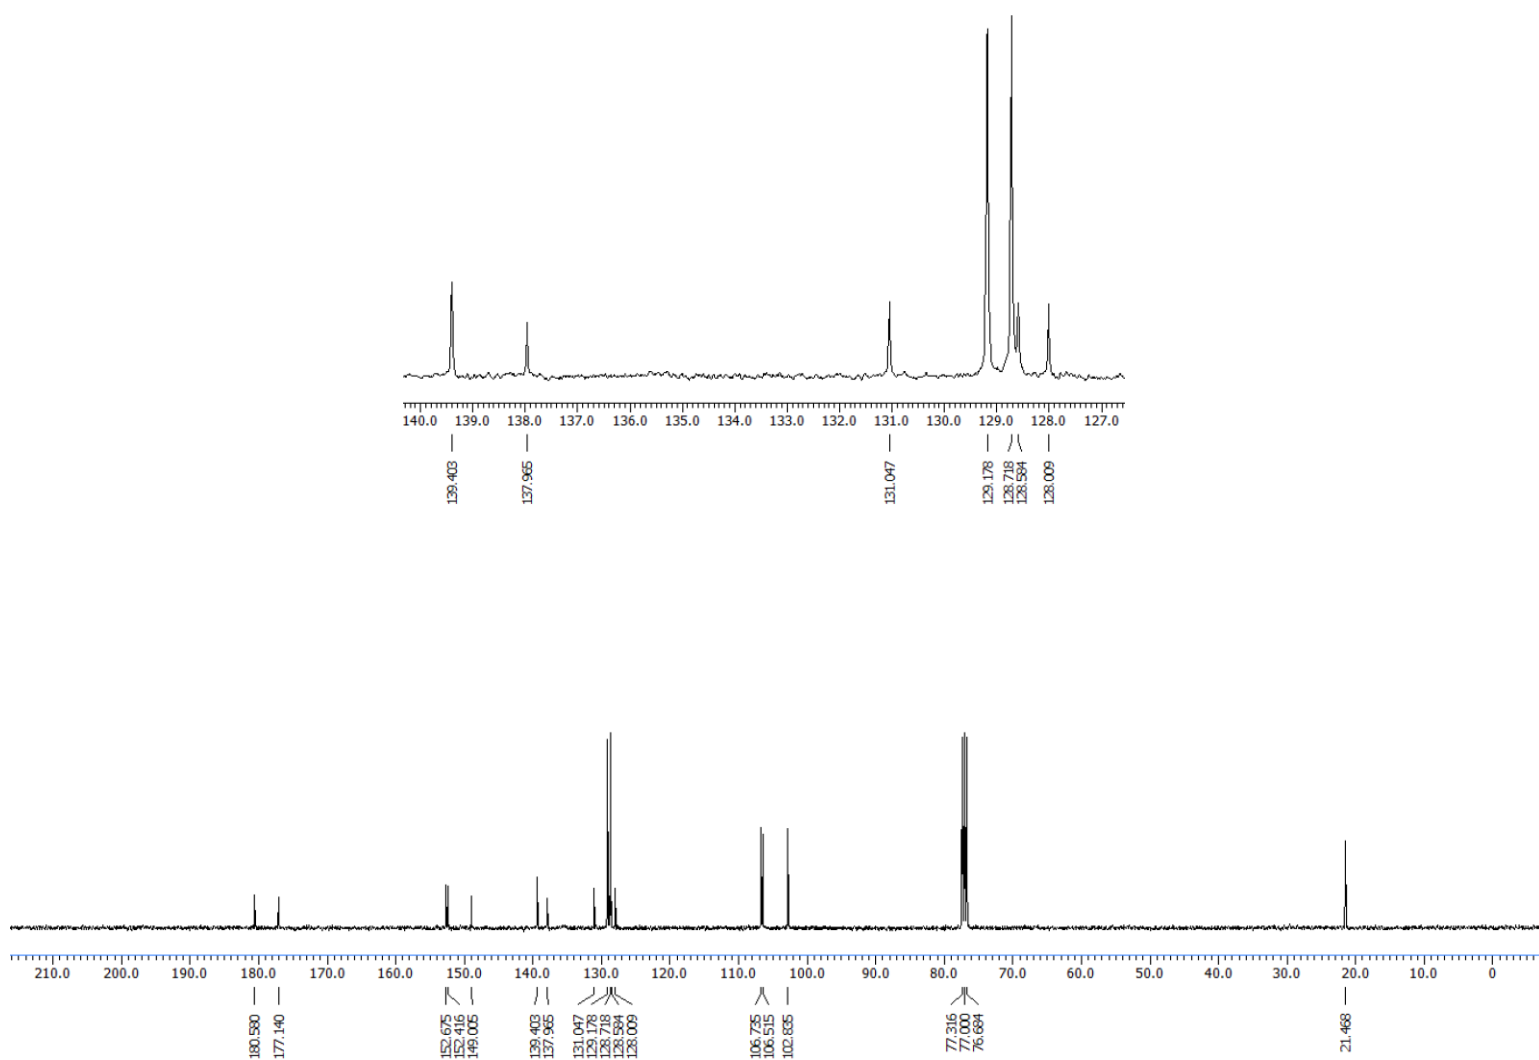



# HRMS

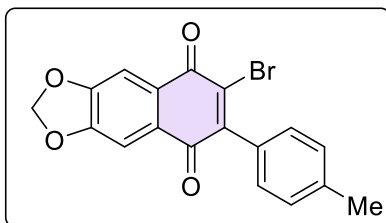

**6-bromo-7-(*p*-tolyl)naphtho[2,3-*d*][1,3]dioxole-5,8-dione (3ad)**

## Qualitative Compound Report

Data File: MNS-345.d  
Sample Type: Sample  
Instrument Name: Instrument 1  
Acq Method: MS Scan.m  
IRM Calibration Status: Success  
Comment:   
Sample Name: MNS-345  
Position: P1-A2  
User Name:   
Acquired Time: 31-01-2025 15:23:20  
DA Method: Default.m  
Sample Group:   
Acquisition SW: 6200 series TOF/6500 series  
Version: Q-TOF B.05.01 (B5125)  
Info: 3

### Compound Table

| Compound Label       | RT    | Mass     | Abund | Formula       | Tgt Mass | Diff (ppm) | MFG Formula   | DB Formula    |
|----------------------|-------|----------|-------|---------------|----------|------------|---------------|---------------|
| Cpd 1: C18 H11 Br O4 | 0.149 | 369.9845 | 10298 | C18 H11 Br O4 | 369.9841 | 1.13       | C18 H11 Br O4 | C18 H11 Br O4 |

| Compound Label       | m/z      | RT    | Algorithm       | Mass     |
|----------------------|----------|-------|-----------------|----------|
| Cpd 1: C18 H11 Br O4 | 372.9901 | 0.149 | Find By Formula | 369.9845 |

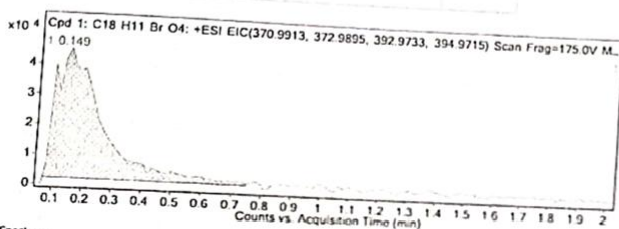

### MS Spectrum

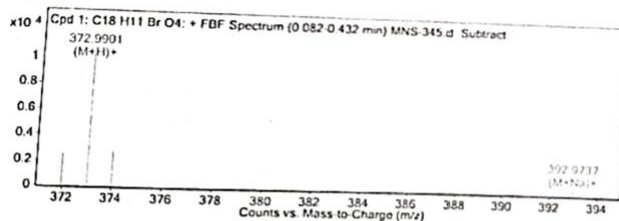

### MS Zoomed Spectrum

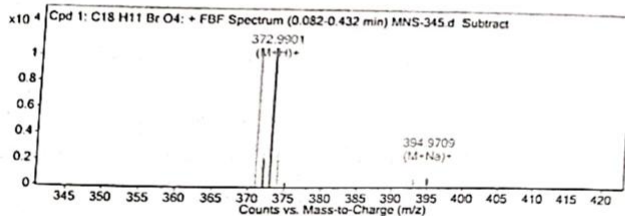

### MS Spectrum Peak List

| m/z      | z | Abund    | Formula      | Ion     |
|----------|---|----------|--------------|---------|
| 370.9918 | 1 | 10201.53 | C18H12BrO4   | (M+H)+  |
| 371.9955 | 1 | 2545.42  | C18H12BrO4   | (M+H)+  |
| 372.9901 | 1 | 10297.83 | C18H12BrO4   | (M+H)+  |
| 373.9929 | 1 | 2623.86  | C18H12BrO4   | (M+H)+  |
| 374.9921 | 1 | 301.27   | C18H12BrO4   | (M+H)+  |
| 392.9737 | 1 | 529.89   | C18H11BrNaO4 | (M+Na)+ |
| 393.9757 | 1 | 68.17    | C18H11BrNaO4 | (M+Na)+ |
| 394.9709 | 1 | 795.11   | C18H11BrNaO4 | (M+Na)+ |

--- End Of Report ---

## IR Spectra

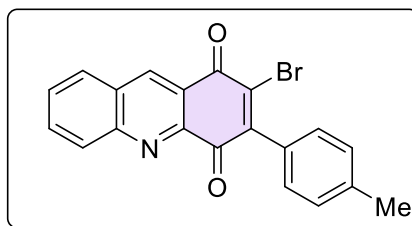

**2-bromo-3-(*p*-tolyl)acridine-1,4-dione (3ae)**

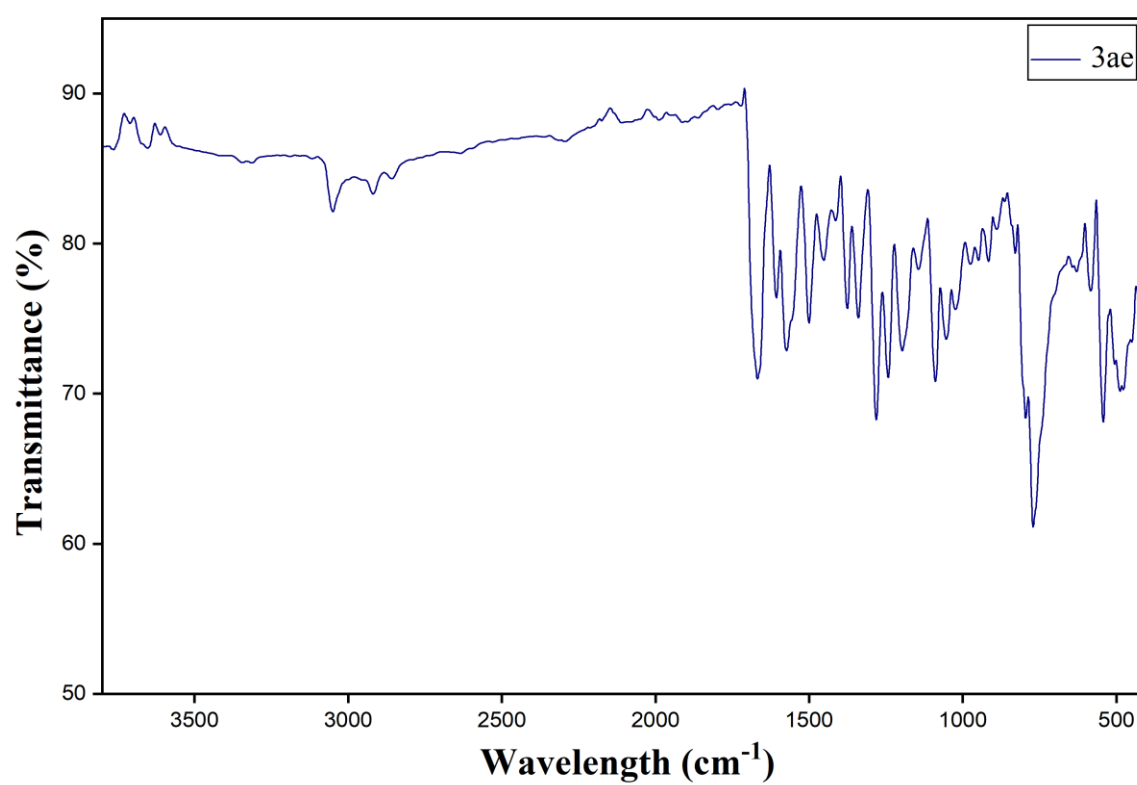

<sup>1</sup>H NMR (400 MHz, CDCl<sub>3</sub>)

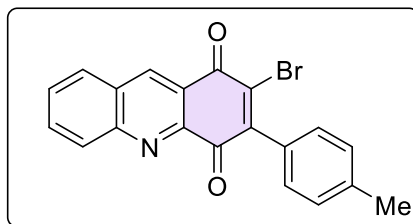

**2-bromo-3-(*p*-tolyl)acridine-1,4-dione (3ae)**

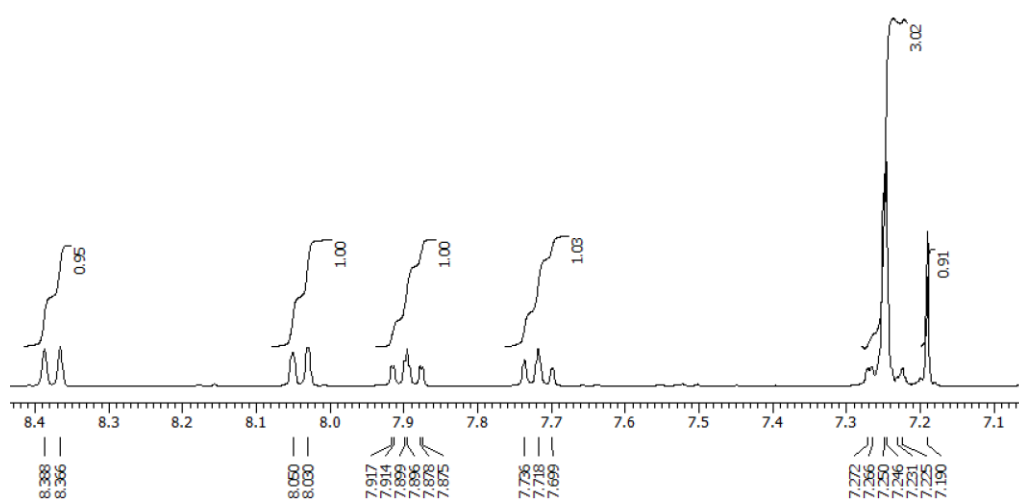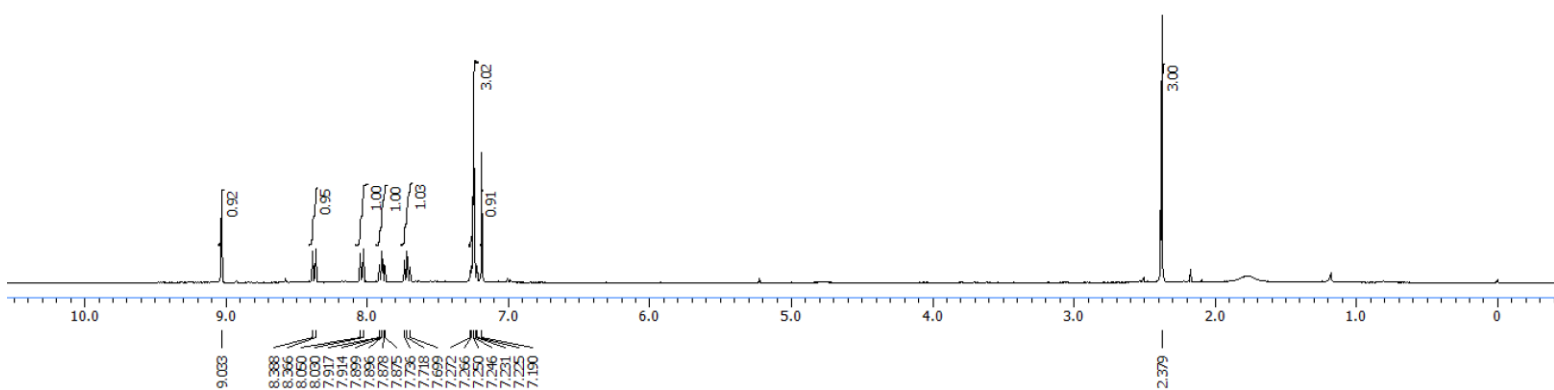

$^{13}\text{C}\{^1\text{H}\}$  NMR (100 MHz,  $\text{CDCl}_3$ )

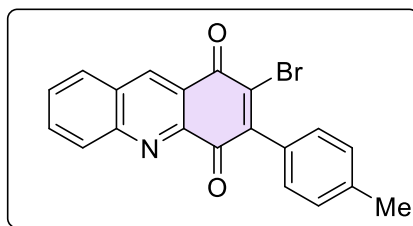

**2-bromo-3-(*p*-tolyl)acridine-1,4-dione (3ae)**

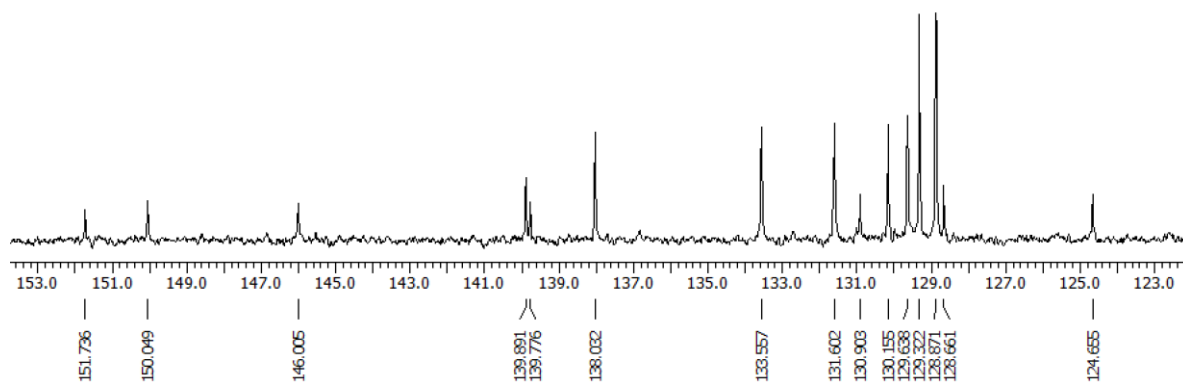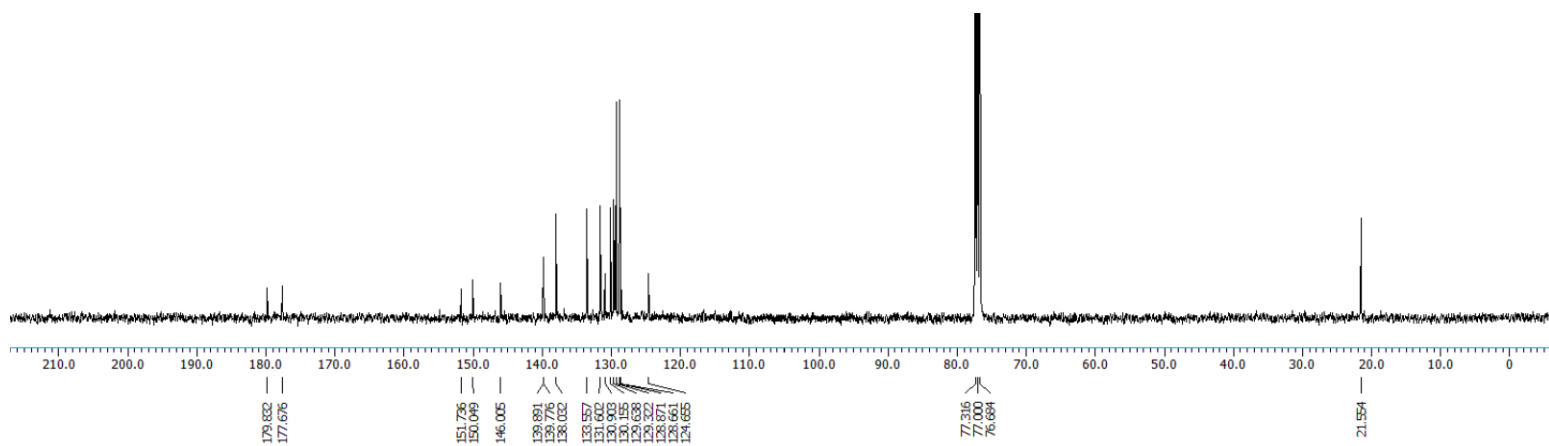

# HRMS

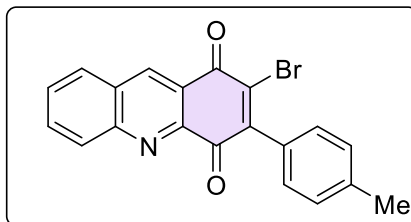

2-bromo-3-(p-tolyl)acridine-1,4-dione (3ae)

## Qualitative Compound Report

Data File: MNS-349.d  
Sample Type: Sample  
Instrument Name: Instrument 1  
Acq Method: MS Scan.m  
IRM Calibration Status: Success  
Comment:   
Sample Name: MNS-349  
Position: P1-C8  
User Name:   
Acquired Time: 20-03-2025 14:51:29  
DA Method: Default.m

Sample Group: Info. 3  
Acquisition SW: 6200 series TOF/6500 series  
Version: Q-TOF B.05.01 (B5125)

| Compound Label         | RT    | Mass     | Abund  | Formula         | Tgt Mass | Diff (ppm) | MFG Formula     | DB Formula      |
|------------------------|-------|----------|--------|-----------------|----------|------------|-----------------|-----------------|
| Cpd 1: C20 H12 Br N O2 | 0.154 | 377.0061 | 224193 | C20 H12 Br N O2 | 377.0051 | 2.65       | C20 H12 Br N O2 | C20 H12 Br N O2 |

| Compound Label         | m/z      | RT    | Algorithm       | Mass     |
|------------------------|----------|-------|-----------------|----------|
| Cpd 1: C20 H12 Br N O2 | 380.0117 | 0.154 | Find By Formula | 377.0061 |

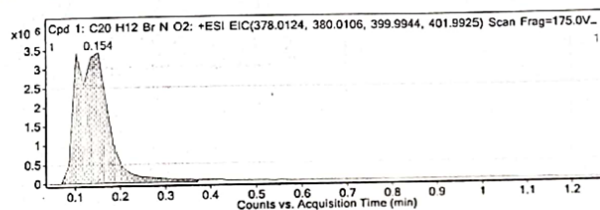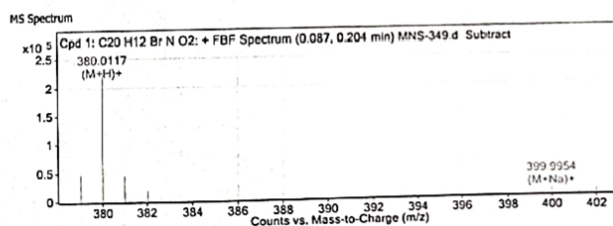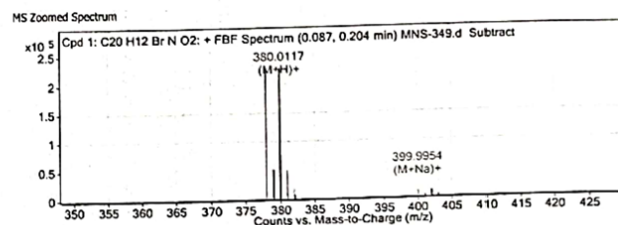

MS Spectrum Peak List

| m/z      | z | Abund     | Formula       | Ion     |
|----------|---|-----------|---------------|---------|
| 378.0129 | 1 | 223393.84 | C20H13BrNO2   | (M+H)+  |
| 379.0161 | 1 | 46849.85  | C20H13BrNO2   | (M+H)+  |
| 380.0117 | 1 | 224193.06 | C20H13BrNO2   | (M+H)+  |
| 381.0149 | 1 | 45882.78  | C20H13BrNO2   | (M+H)+  |
| 382.0737 | 1 | 18065.91  | C20H13BrNO2   | (M+H)+  |
| 383.0275 | 1 | 3640.91   | C20H13BrNO2   | (M+H)+  |
| 399.9954 | 1 | 10184.73  | C20H12BrNNaO2 | (M+Na)+ |
| 400.9956 | 1 | 3208.83   | C20H12BrNNaO2 | (M+Na)+ |
| 401.9933 | 1 | 9868.73   | C20H12BrNNaO2 | (M+Na)+ |
| 402.9919 | 1 | 3348.97   | C20H12BrNNaO2 | (M+Na)+ |

## IR Spectra

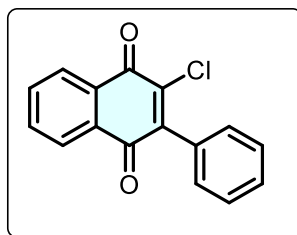

**2-Chloro-3-phenylnaphthalene-1,4-dione (5a)**

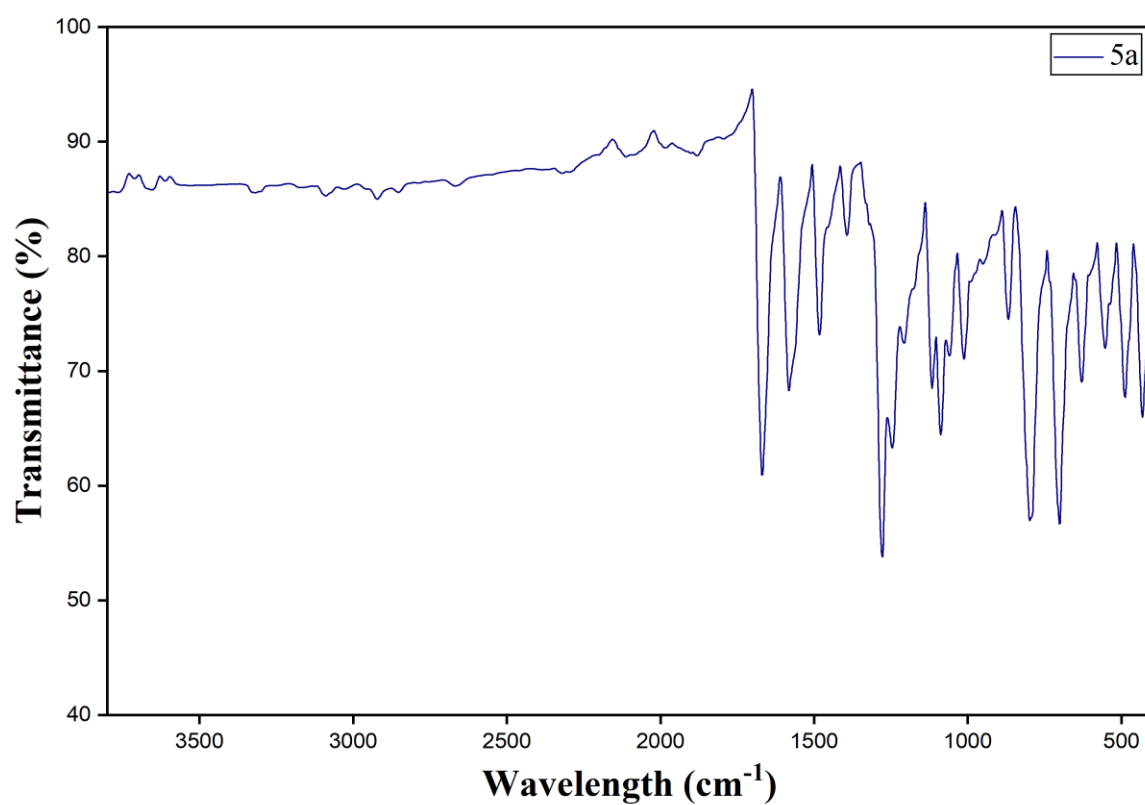

<sup>1</sup>H NMR (400 MHz, CDCl<sub>3</sub>)

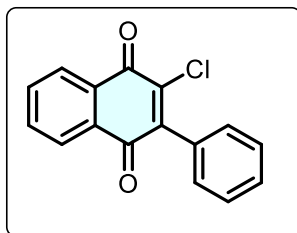

**2-Chloro-3-phenylnaphthalene-1,4-dione (5a)**

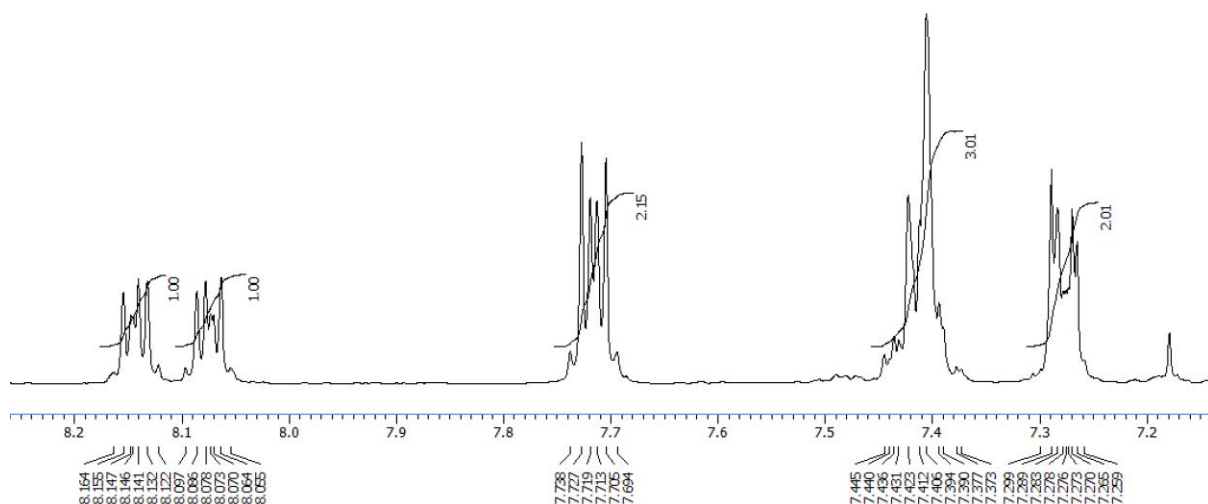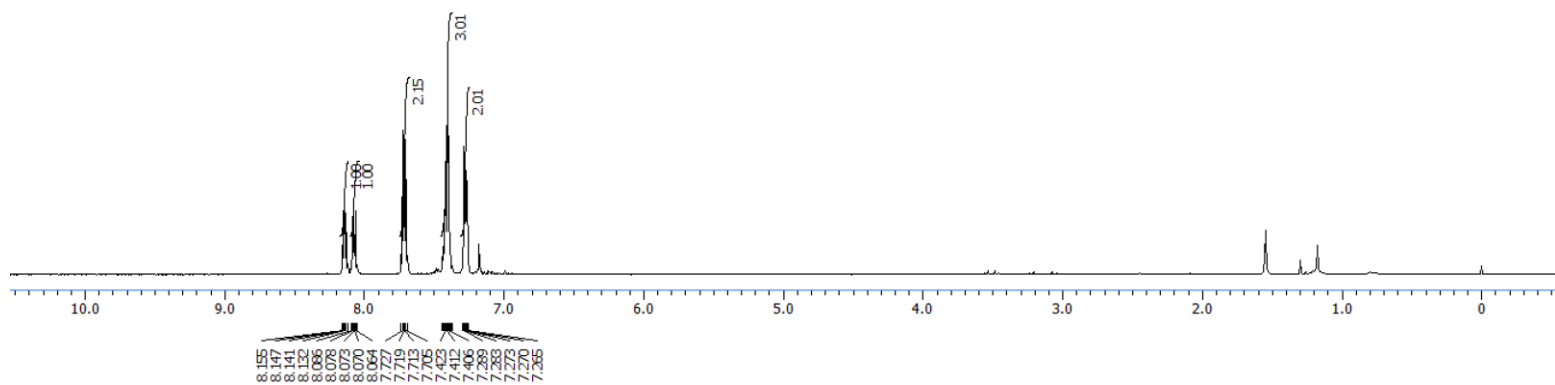

$^{13}\text{C}\{^1\text{H}\}$  NMR (100 MHz,  $\text{CDCl}_3$ )

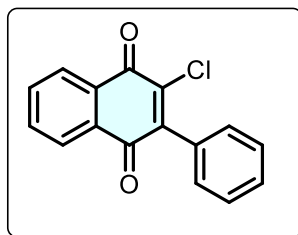

**2-Chloro-3-phenylnaphthalene-1,4-dione (5a)**

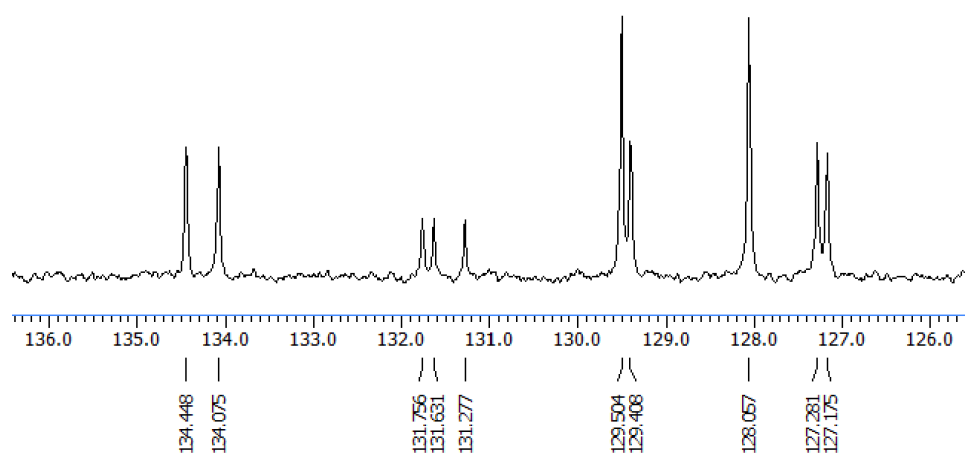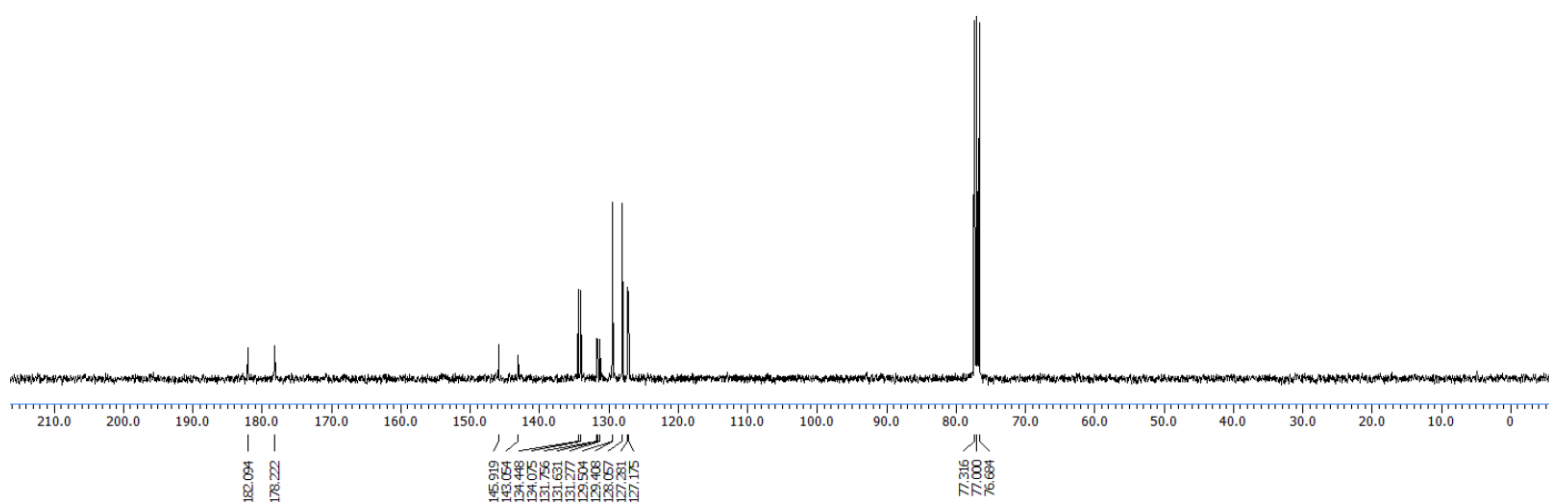



# HRMS

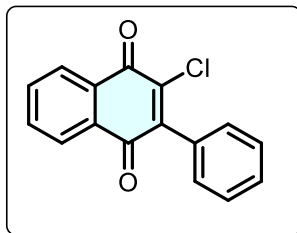

## 2-Chloro-3-phenylnaphthalene-1,4-dione (5a)

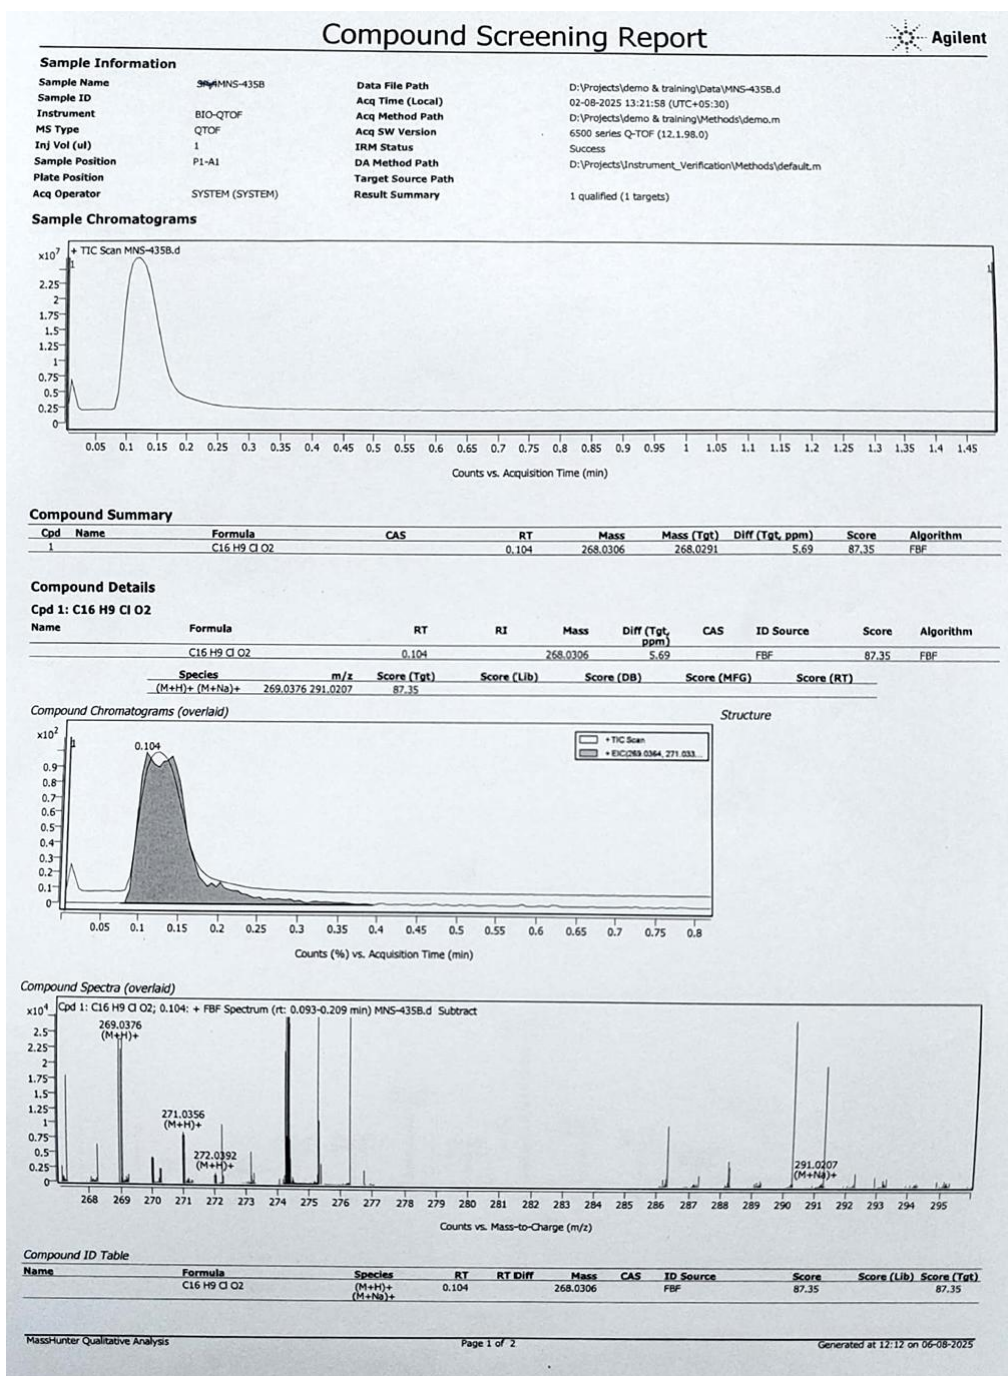

## IR Spectra

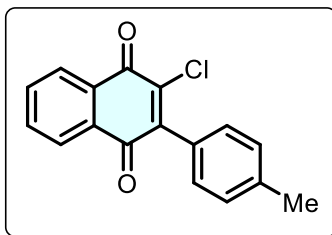

**2-chloro-3-(p-tolyl)naphthalene-1,4-dione (5b).**

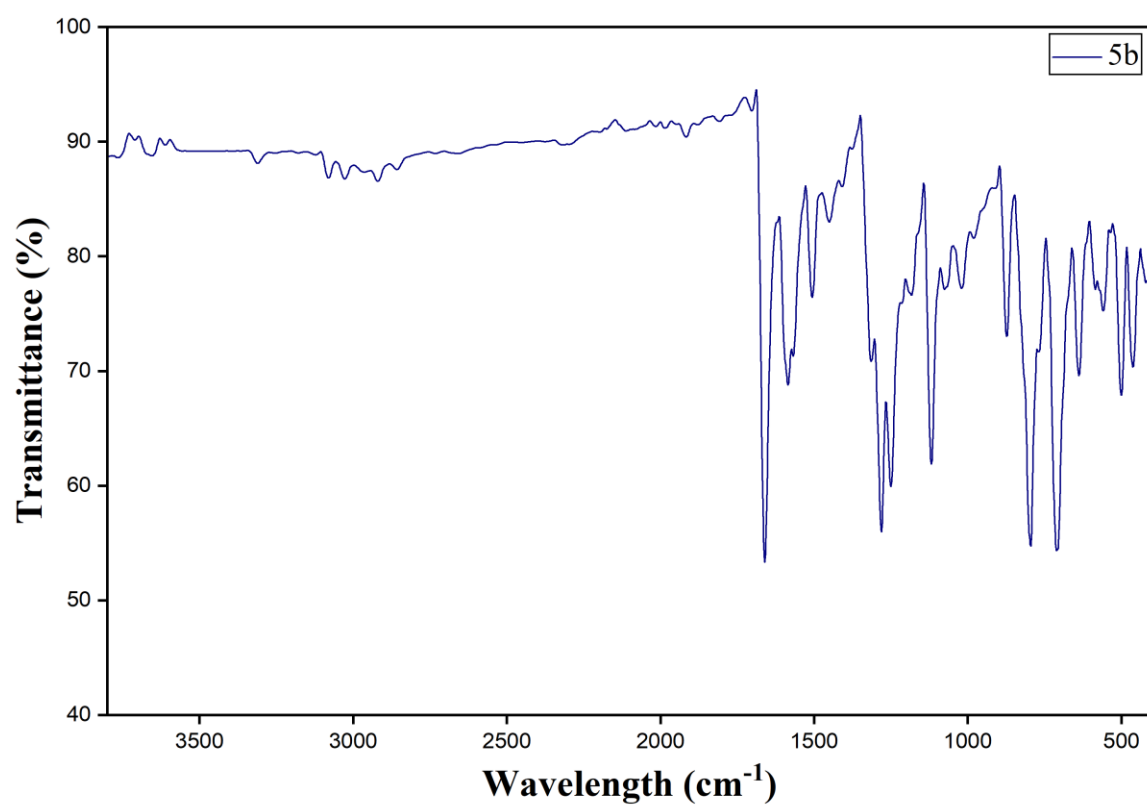

<sup>1</sup>H NMR (400 MHz, CDCl<sub>3</sub>)

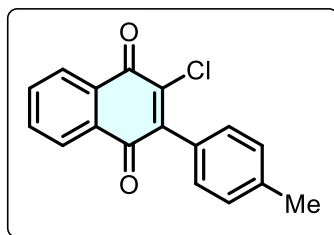

**2-chloro-3-(p-tolyl)naphthalene-1,4-dione (5b).**

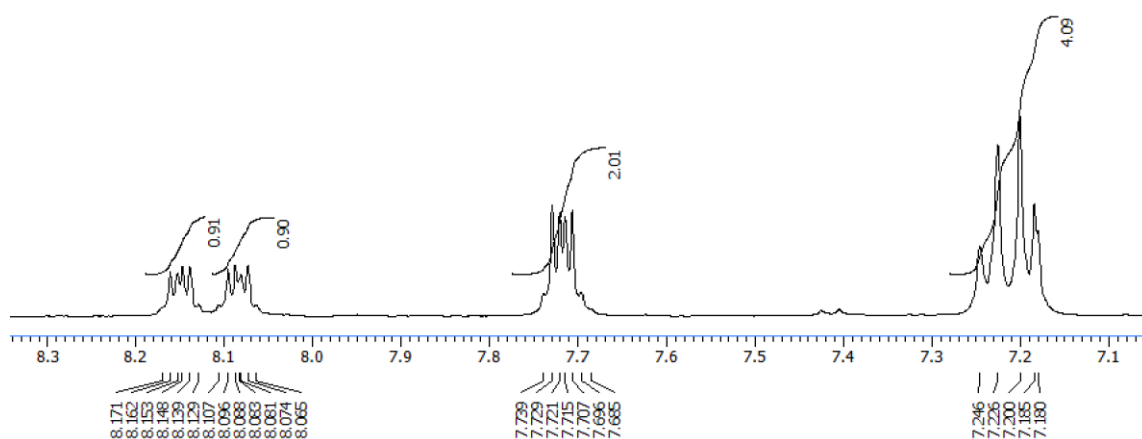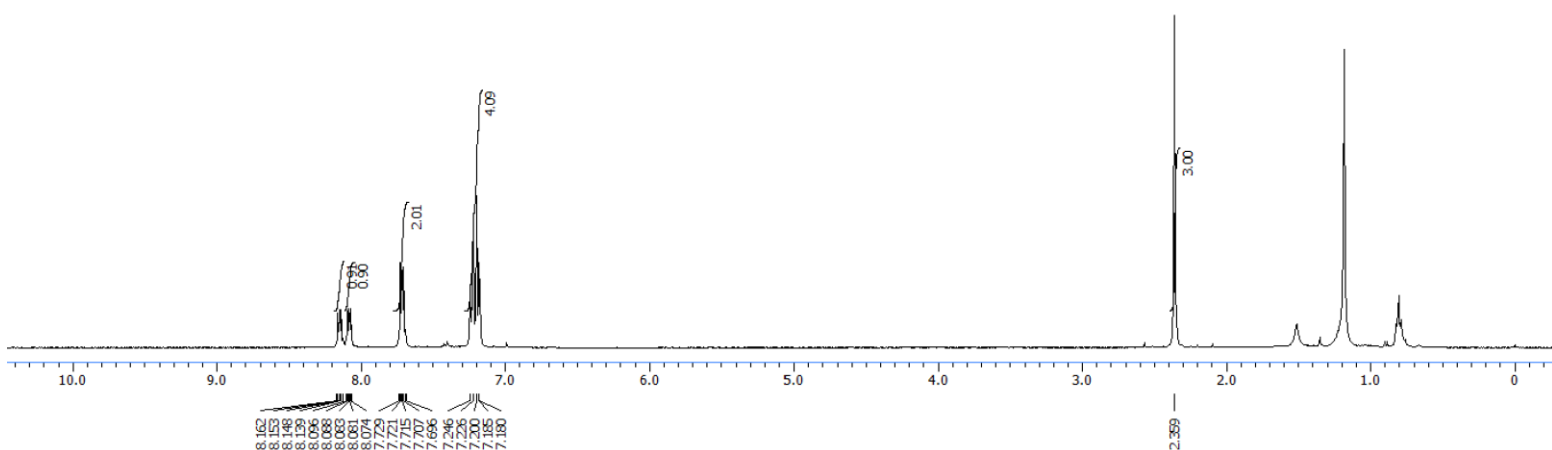

$^{13}\text{C}\{^1\text{H}\}$  NMR (100 MHz,  $\text{CDCl}_3$ )

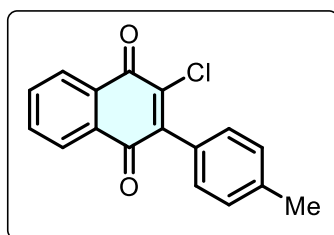

**2-chloro-3-(p-tolyl)naphthalene-1,4-dione (5b).**

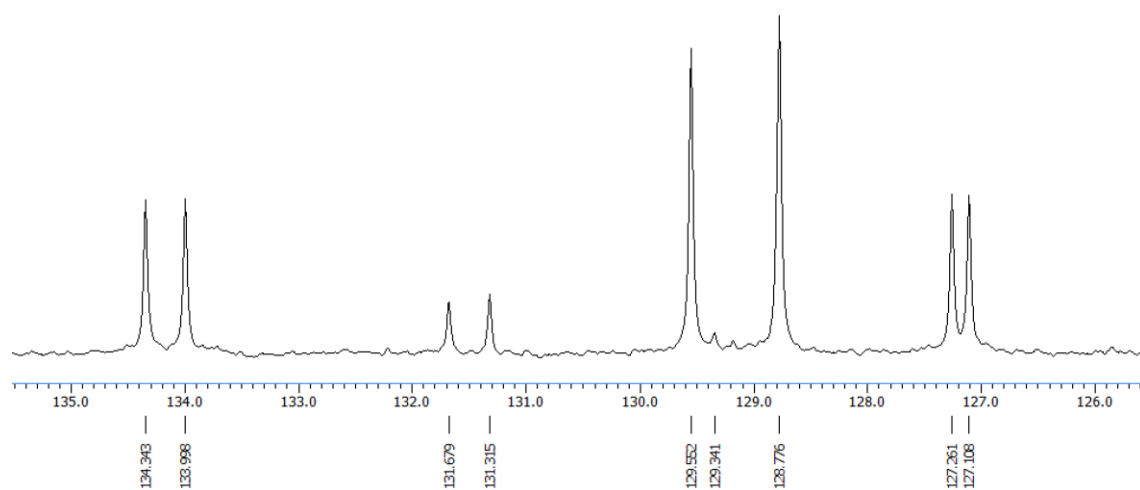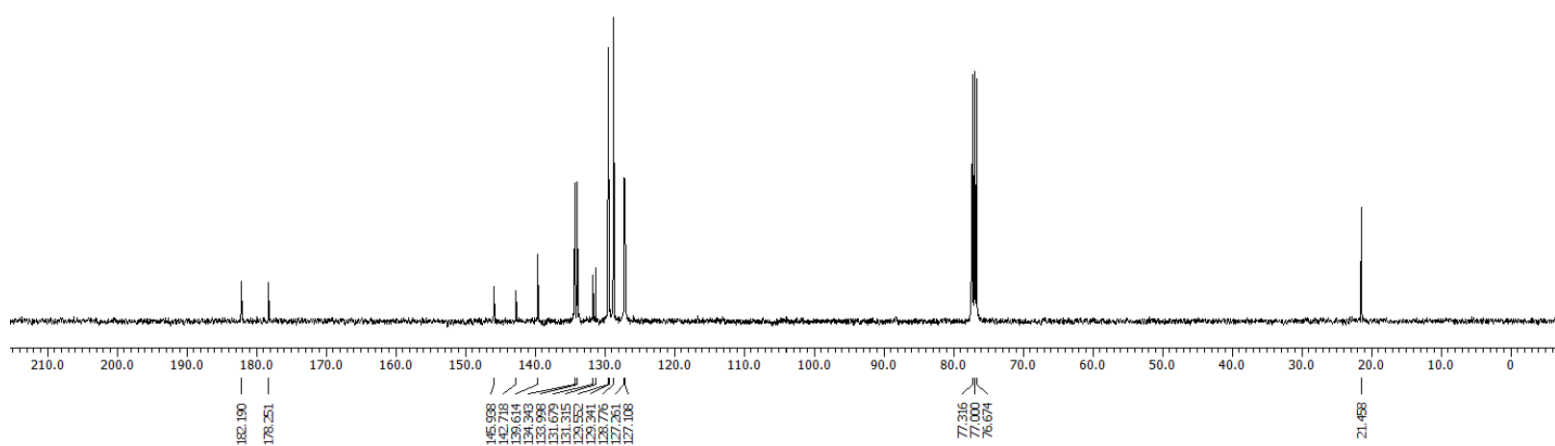

# HRMS

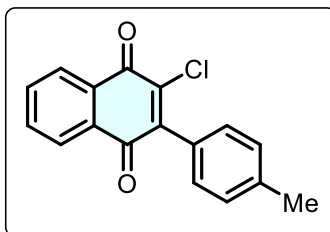

2-chloro-3-(p-tolyl)naphthalene-1,4-dione (5b).

## Qualitative Compound Report

Data File: MNS-398.d  
Sample Type: Sample  
Instrument Name: Instrument 1  
Acq Method: MS Scan.m  
IRM Calibration Status: Success  
Comment:  
Sample Name: MNS-398  
Position: P1-03  
User Name:  
Acquired Time: 20-05-2025 13:06:17  
DA Method: Default.m

Sample Group: Info. 3  
Acquisition SW: 6200 series TOF/6500 series  
Version: Q-TOF B.05.01 (B5125)

### Compound Table

| Compound Label       | RT    | Mass     | Abund | Formula       | Tgt Mass | Diff (ppm) | MFG Formula   | DB Formula    |
|----------------------|-------|----------|-------|---------------|----------|------------|---------------|---------------|
| Cpd 1: C17 H11 Cl O2 | 0.159 | 282.0453 | 50150 | C17 H11 Cl O2 | 282.0448 | 1.82       | C17 H11 Cl O2 | C17 H11 Cl O2 |

| Compound Label       | m/z      | RT    | Algorithm       | Mass     |
|----------------------|----------|-------|-----------------|----------|
| Cpd 1: C17 H11 Cl O2 | 283.0526 | 0.159 | Find By Formula | 282.0453 |

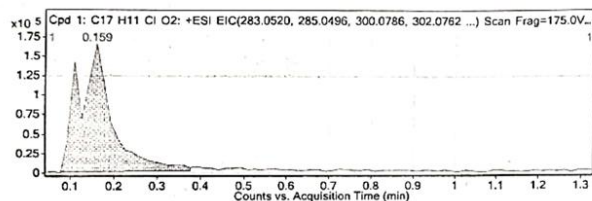

### MS Spectrum

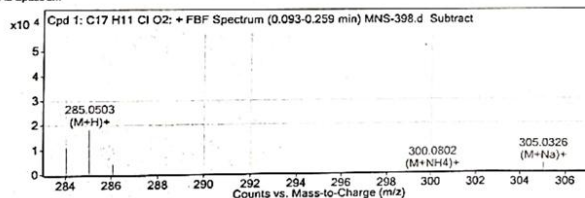

### MS Zoomed Spectrum

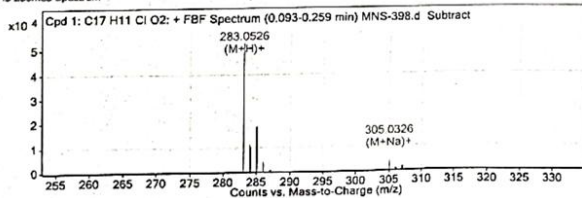

### MS Spectrum Peak List

| m/z      | z | Abund    | Formula      | Ion      |
|----------|---|----------|--------------|----------|
| 283.0526 | 1 | 50149.84 | C17H12ClO2   | (M+H)+   |
| 284.0565 | 1 | 11052.92 | C17H12ClO2   | (M+H)+   |
| 285.0503 | 1 | 18559.03 | C17H12ClO2   | (M+H)+   |
| 286.0526 | 1 | 3790.17  | C17H12ClO2   | (M+H)+   |
| 287.0621 | 1 | 501.44   | C17H12ClO2   | (M+H)+   |
| 300.0802 | 1 | 130.44   | C17H15ClNO2  | (M+NH4)+ |
| 305.0326 | 1 | 3377.94  | C17H11ClNaO2 | (M+Na)+  |
| 306.0315 | 1 | 901.04   | C17H11ClNaO2 | (M+Na)+  |
| 307.0333 | 1 | 1012.36  | C17H11ClNaO2 | (M+Na)+  |

--- End Of Report ---

## IR Spectra

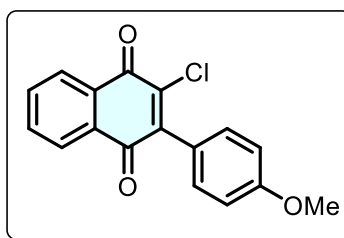

**2-chloro-3-(4-methoxyphenyl)naphthalene-1,4-dione (5c).**

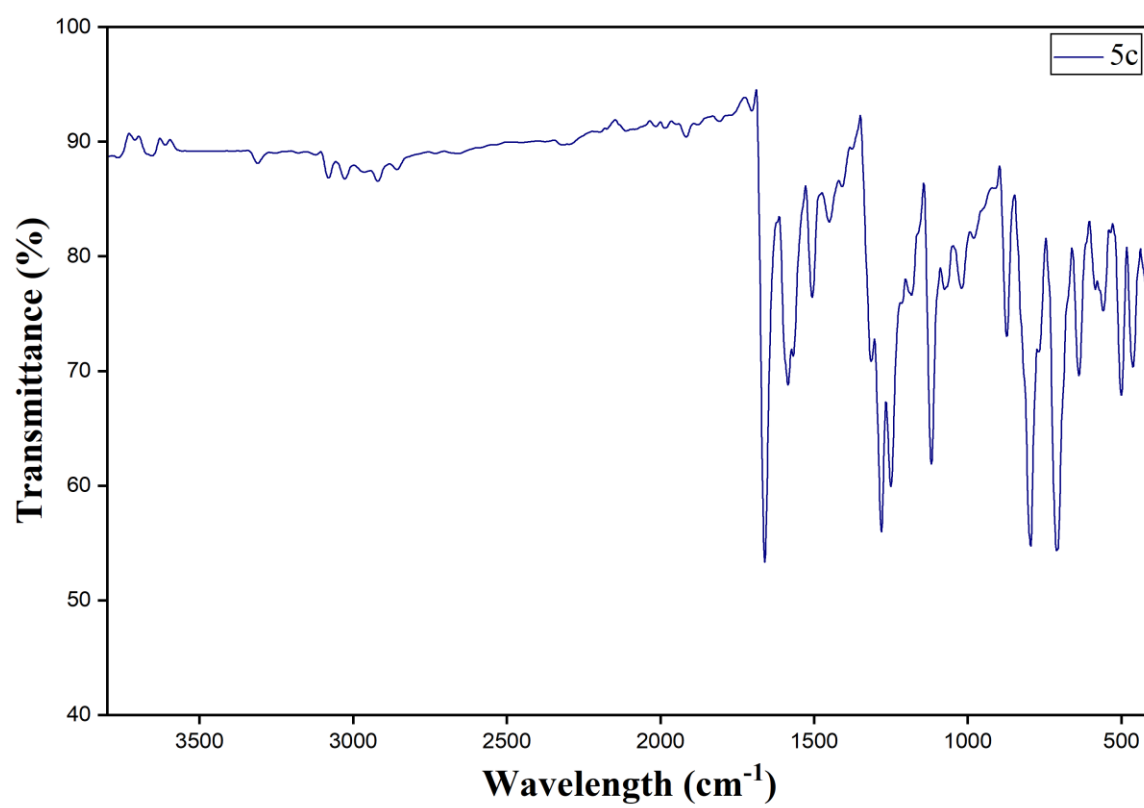

<sup>1</sup>H NMR (400 MHz, CDCl<sub>3</sub>)

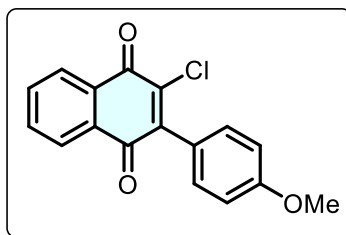

**2-chloro-3-(4-methoxyphenyl)naphthalene-1,4-dione (5c).**

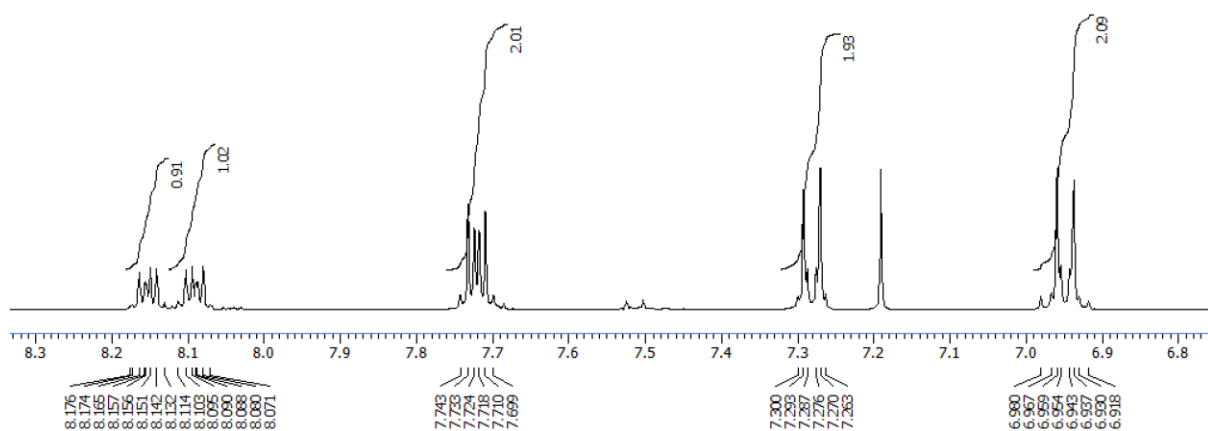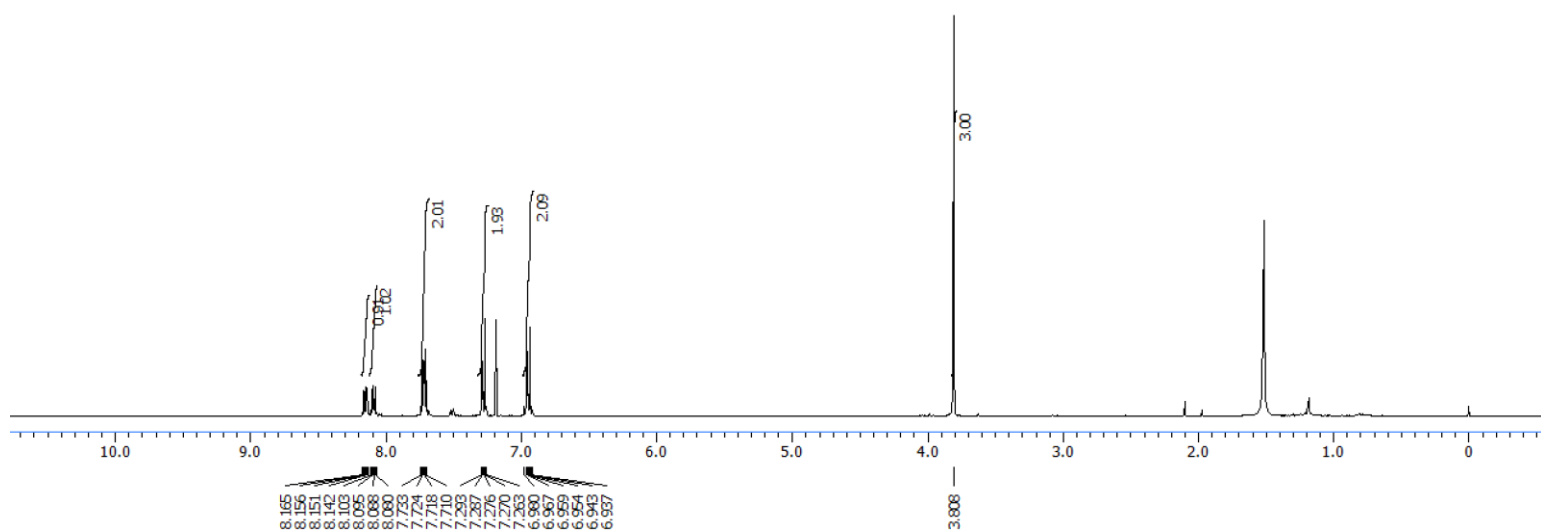

$^{13}\text{C}\{^1\text{H}\}$  NMR (100 MHz,  $\text{CDCl}_3$ )

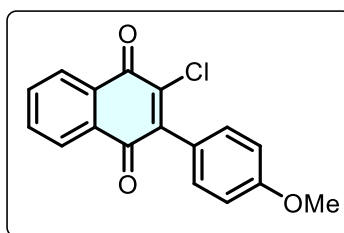

**2-chloro-3-(4-methoxyphenyl)naphthalene-1,4-dione (5c).**

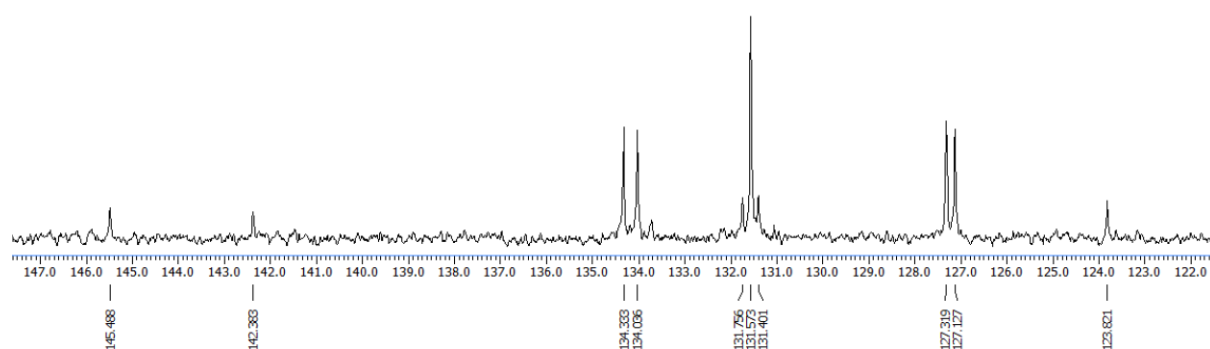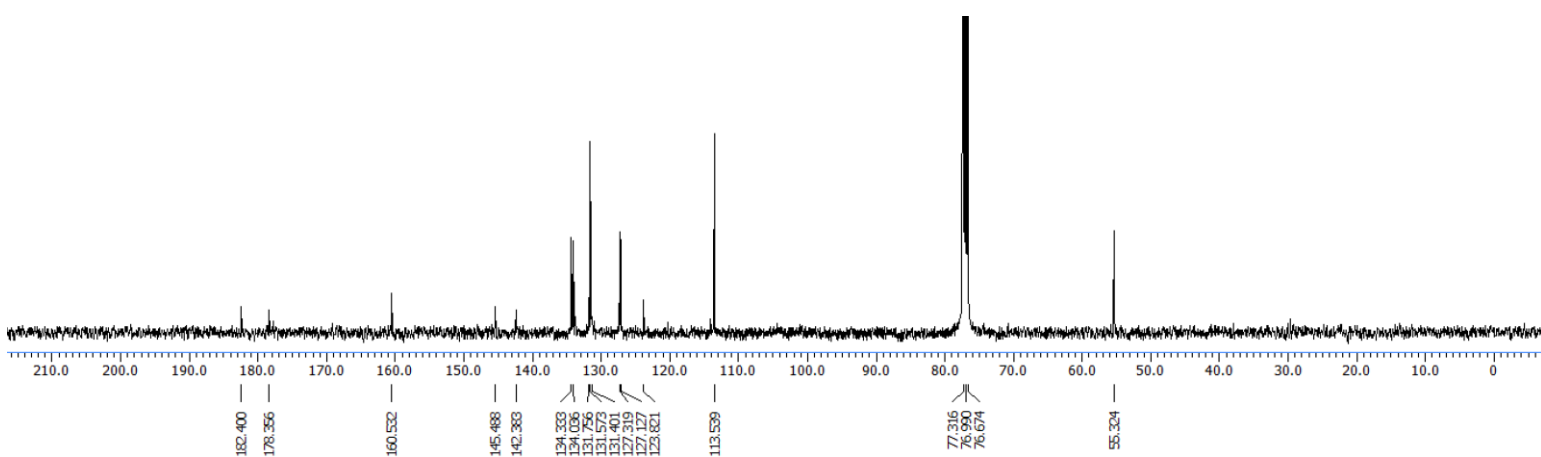



# HRMS

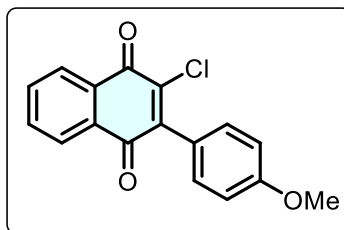

**2-chloro-3-(4-methoxyphenyl)naphthalene-1,4-dione (5c).**

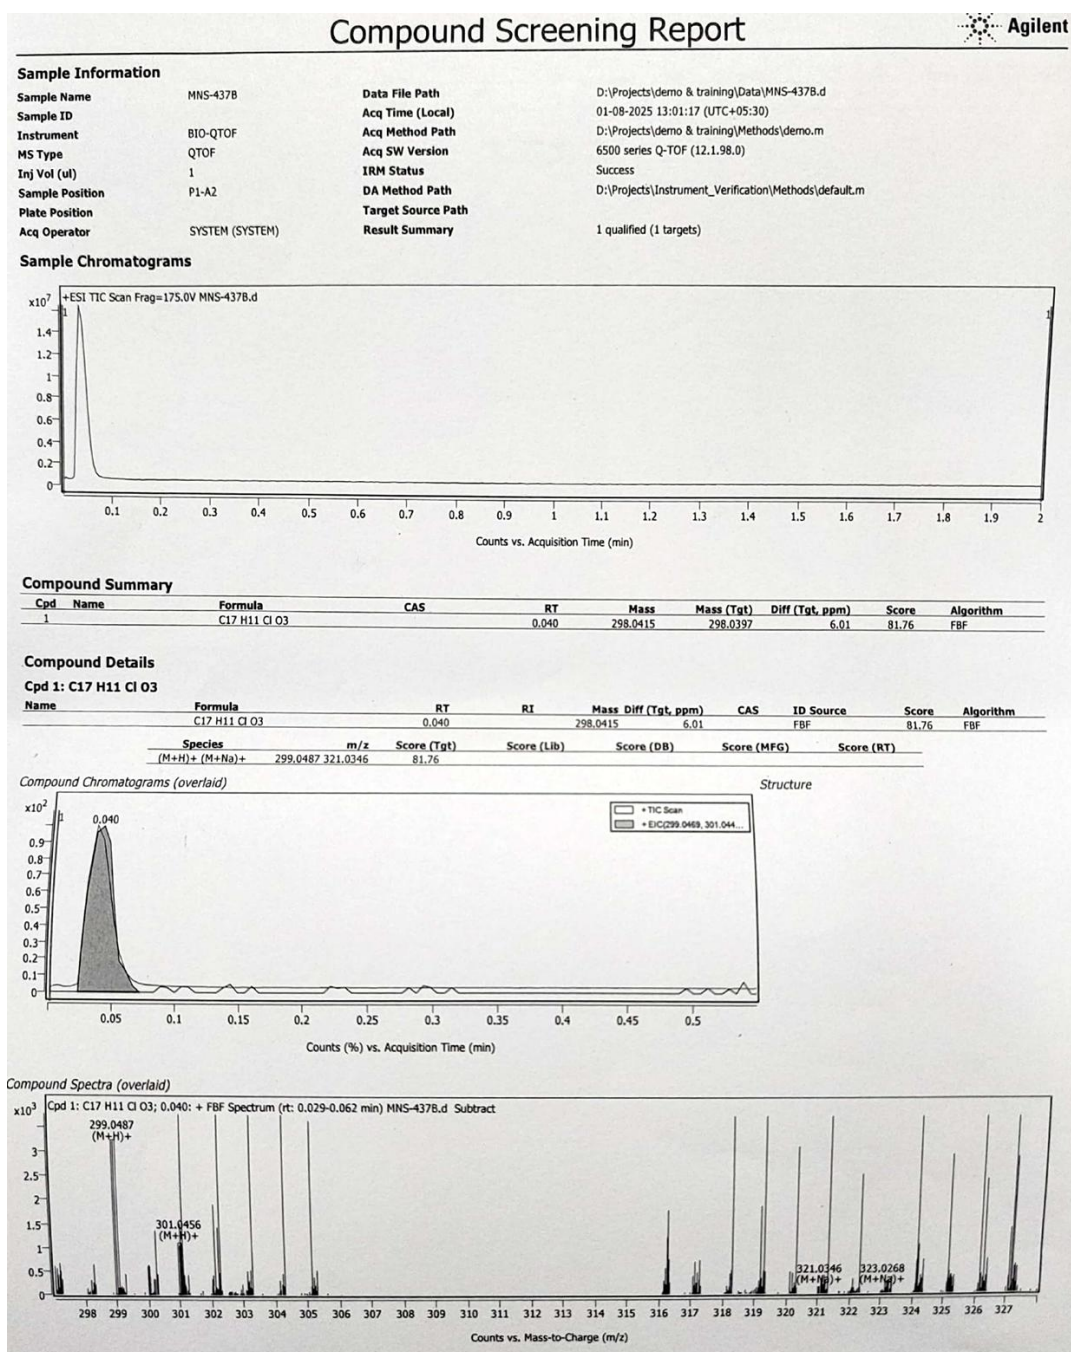

**$^1\text{H}$  NMR (400 MHz,  $\text{CDCl}_3$ )**

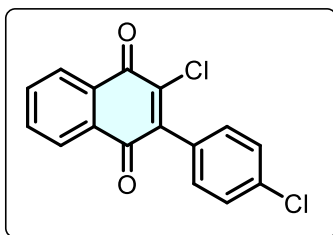

**2-chloro-3-(4-chlorophenyl)naphthalene-1,4-dione (5d).**

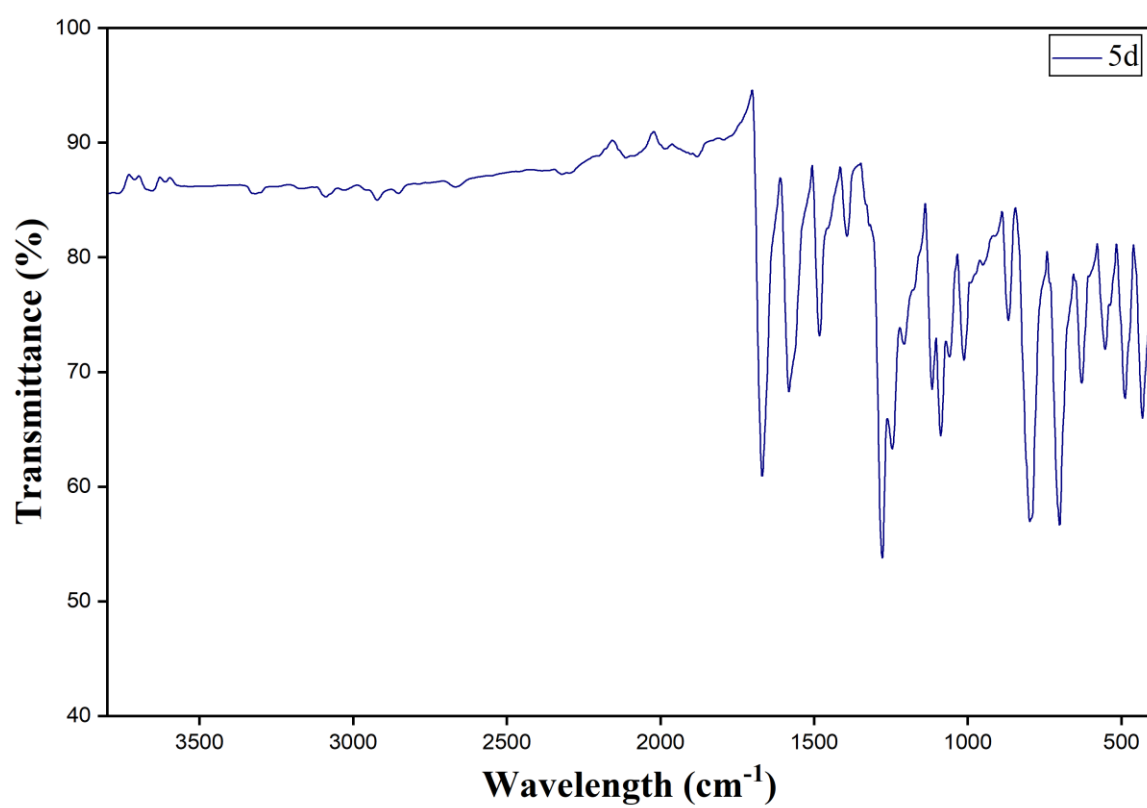

<sup>1</sup>H NMR (400 MHz, CDCl<sub>3</sub>)

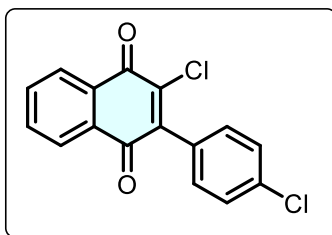

**2-chloro-3-(4-chlorophenyl)naphthalene-1,4-dione (5d).**

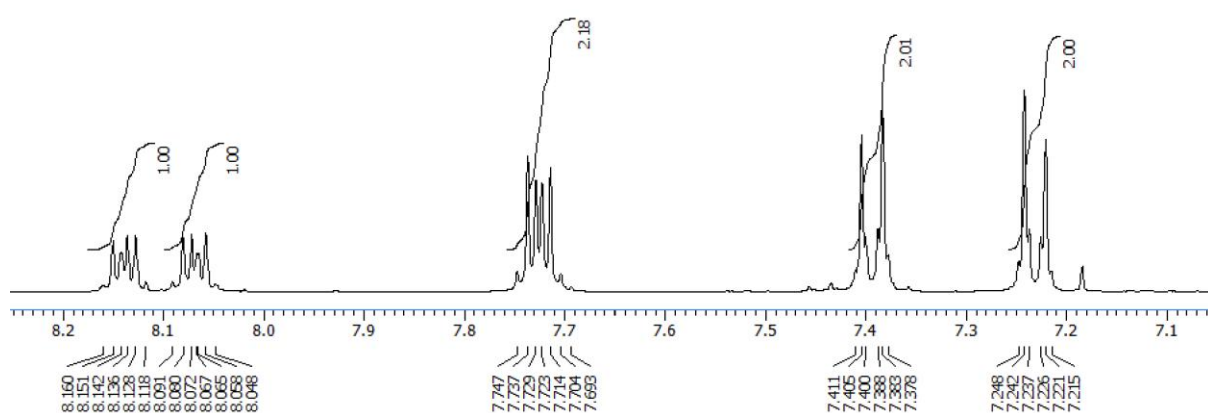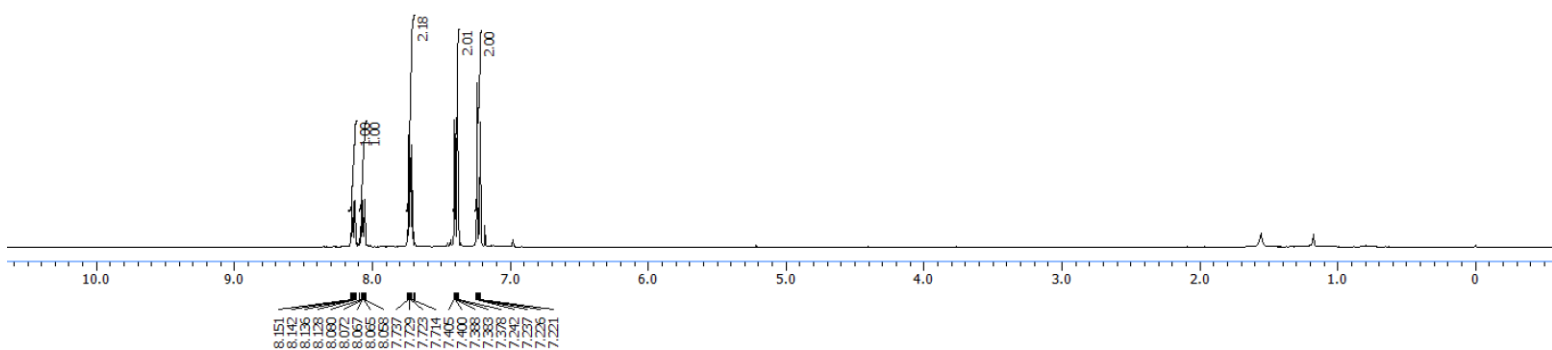

$^{13}\text{C}\{^1\text{H}\}$  NMR (100 MHz,  $\text{CDCl}_3$ )

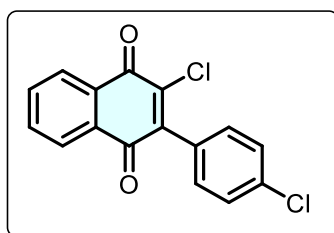

**2-chloro-3-(4-chlorophenyl)naphthalene-1,4-dione (5d).**

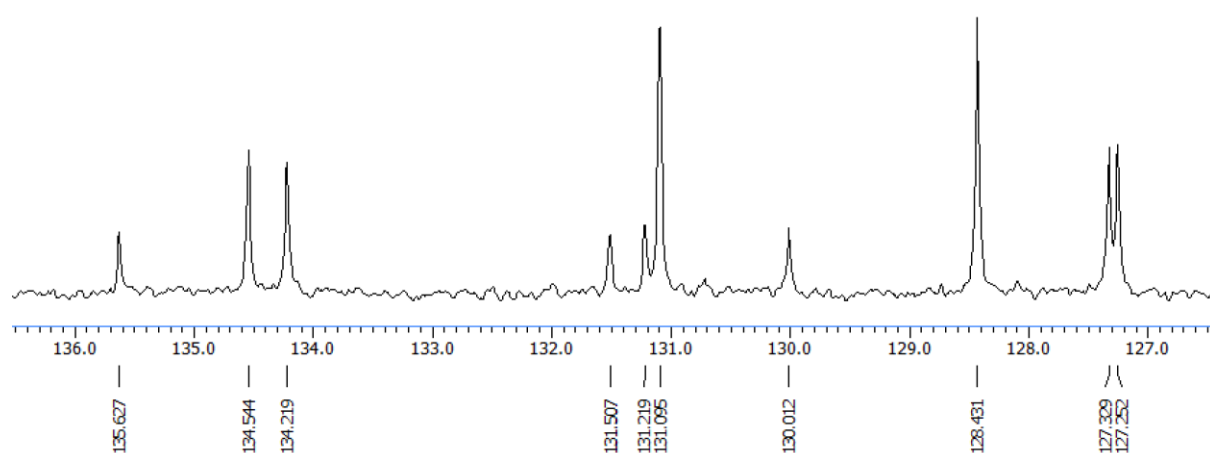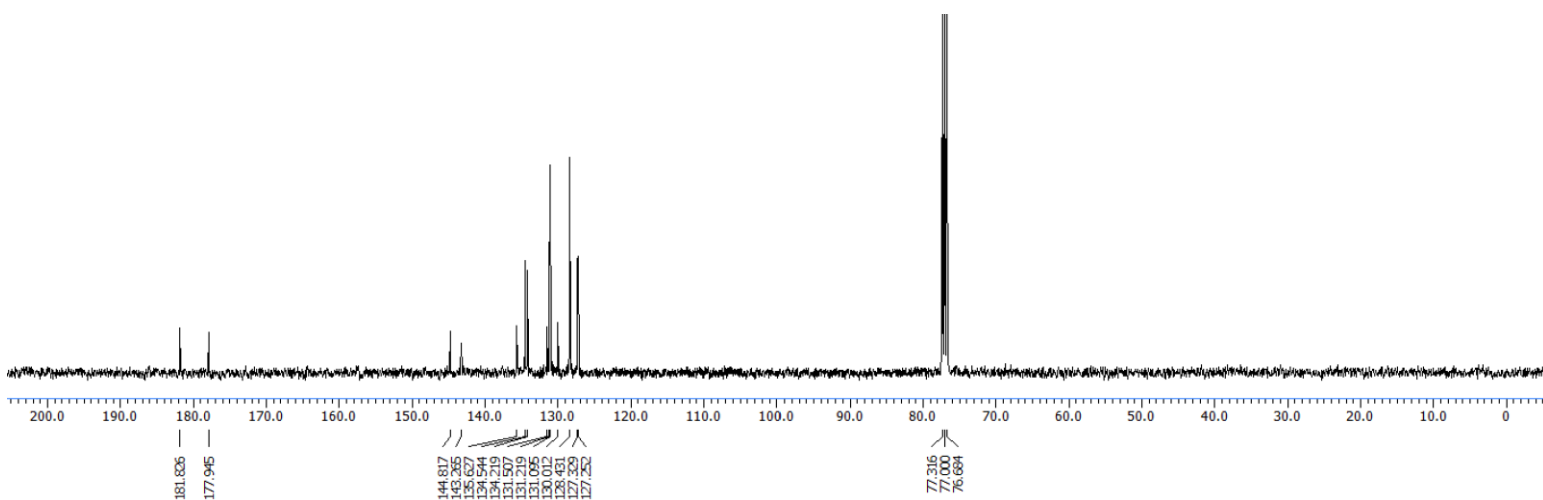

# HRMS

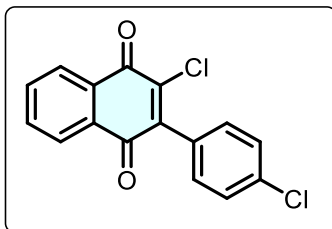

## 2-chloro-3-(4-chlorophenyl)naphthalene-1,4-dione (5d).

| Custom Workflow Report    |                 |                    |                                             | Agilent |
|---------------------------|-----------------|--------------------|---------------------------------------------|---------|
| <b>Sample Information</b> |                 |                    |                                             |         |
| Sample Name               | MHS-4368        | Data File Path     | D:\Projects\demo & training\Data\MHS-4368.d |         |
| Sample ID                 |                 | Acq Time (Local)   | 11-09-2025 11:39:14 (UTC+05:30)             |         |
| Instrument                | BIO-QTOF        | Acq Method Path    | D:\Projects\demo & training\Methods\demo.m  |         |
| MS Type                   | QTOF            | Acq SW Version     | 6500 series Q-TOF (12.1.98.0)               |         |
| Inj Vol (µl)              | 2               | 3844 Status        | Success                                     |         |
| Sample Position           | P1-A7           | Q14 Method Path    |                                             |         |
| Plate Position            |                 | Target Source Path |                                             |         |
| Acq Operator              | SYSTEM (SYSTEM) | Result Summary     | 1 qualified (1 targets)                     |         |

### Sample Chromatograms

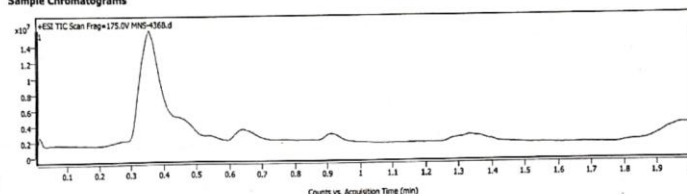

### Sample Spectra

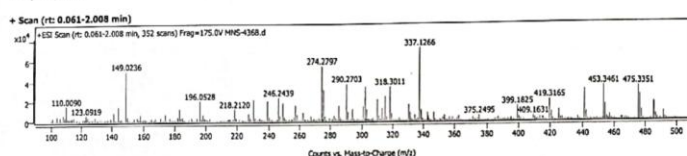

### Compound Summary

| Comp. Name | Formula       | RT    | Mass     | CAS | ID Source | Score | Score (LIB) | Score (DB) | Score (MFG) | Algorithm |
|------------|---------------|-------|----------|-----|-----------|-------|-------------|------------|-------------|-----------|
| 1          | C16 H8 Cl2 O2 | 1.348 | 304.9913 |     | FPF       | 55.17 |             |            |             | FPF       |

### Compound Details

| Cpd 1: C16 H8 Cl2 O2 |               |             |             |            |             |            |        |
|----------------------|---------------|-------------|-------------|------------|-------------|------------|--------|
| Name                 | Formula       | RT          | RI          | Mass       | Score       | Algorithm  | Lib/DB |
|                      | C16 H8 Cl2 O2 | 1.348       |             | 304.9913   | 55.17       | FPF        |        |
| Species              | m/z           | Score (Lib) | Num Spectra | Score (DB) | Score (MFG) | Score (RT) |        |
| (M+H)+               | 302.9981      | 303.0081    | 374         | 95.74      |             |            |        |

### Compound Spectra

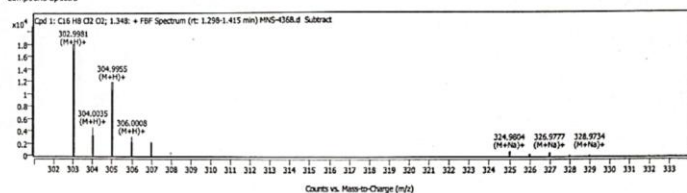

## Custom Workflow Report

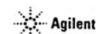

| Spectrum Peaks |            |            |       |          |                 |             |   |  |  |  |
|----------------|------------|------------|-------|----------|-----------------|-------------|---|--|--|--|
| m/z            | m/z (Calc) | Diff (ppm) | Abund | Height % | Height % (Calc) | Ion Species | Z |  |  |  |
| 302.9981       | 302.9974   | 2.36       | 16909 | 100.00   | 100.00          | (M+H)+      | 1 |  |  |  |
| 304.0035       | 304.0008   | 8.83       | 4521  | 26.74    | 17.48           | (M+H)+      | 1 |  |  |  |
| 304.9955       | 304.9947   | 2.66       | 10478 | 61.97    | 65.84           | (M+H)+      | 1 |  |  |  |
| 306.0008       | 305.9979   | 9.40       | 2991  | 17.69    | 11.33           | (M+H)+      | 1 |  |  |  |
| 306.9929       | 306.9925   | 1.27       | 1821  | 10.77    | 11.43           | (M+H)+      | 1 |  |  |  |
| 324.9804       | 324.9794   | 3.36       | 633   | 100.00   | 100.00          | (M+Na)+     | 1 |  |  |  |
| 325.9809       | 325.9827   | -5.51      | 129   | 20.34    | 17.47           | (M+Na)+     | 1 |  |  |  |
| 326.9777       | 326.9767   | 3.12       | 482   | 76.09    | 65.84           | (M+Na)+     | 1 |  |  |  |
| 327.9814       | 327.9799   | 4.49       | 99    | 15.56    | 11.33           | (M+Na)+     | 1 |  |  |  |
| 328.9734       | 328.9744   | -3.13      | 89    | 14.09    | 11.43           | (M+Na)+     | 1 |  |  |  |

  

| Spectrum Peaks |            |            |       |          |                 |             |   |  |  |  |
|----------------|------------|------------|-------|----------|-----------------|-------------|---|--|--|--|
| m/z            | m/z (Calc) | Diff (ppm) | Abund | Height % | Height % (Calc) | Ion Species | Z |  |  |  |
| 302.9981       | 302.9974   | 2.36       | 16909 | 100.00   | 100.00          | (M+H)+      | 1 |  |  |  |
| 304.0035       | 304.0008   | 8.83       | 4521  | 26.74    | 17.48           | (M+H)+      | 1 |  |  |  |
| 304.9955       | 304.9947   | 2.66       | 10478 | 61.97    | 65.84           | (M+H)+      | 1 |  |  |  |
| 306.0008       | 305.9979   | 9.40       | 2991  | 17.69    | 11.33           | (M+H)+      | 1 |  |  |  |
| 306.9929       | 306.9925   | 1.27       | 1821  | 10.77    | 11.43           | (M+H)+      | 1 |  |  |  |
| 324.9804       | 324.9794   | 3.36       | 633   | 100.00   | 100.00          | (M+Na)+     | 1 |  |  |  |
| 325.9809       | 325.9827   | -5.51      | 129   | 20.34    | 17.47           | (M+Na)+     | 1 |  |  |  |
| 326.9777       | 326.9767   | 3.12       | 482   | 76.09    | 65.84           | (M+Na)+     | 1 |  |  |  |
| 327.9814       | 327.9799   | 4.49       | 99    | 15.56    | 11.33           | (M+Na)+     | 1 |  |  |  |
| 328.9734       | 328.9744   | -3.13      | 89    | 14.09    | 11.43           | (M+Na)+     | 1 |  |  |  |

**$^1\text{H}$  NMR (400 MHz,  $\text{CDCl}_3$ )**

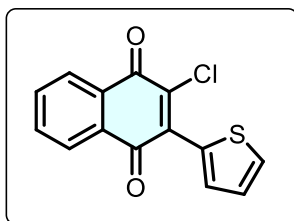

**2-Chloro-3-(thiophen-2-yl)naphthalene-1,4-dione (5e).**

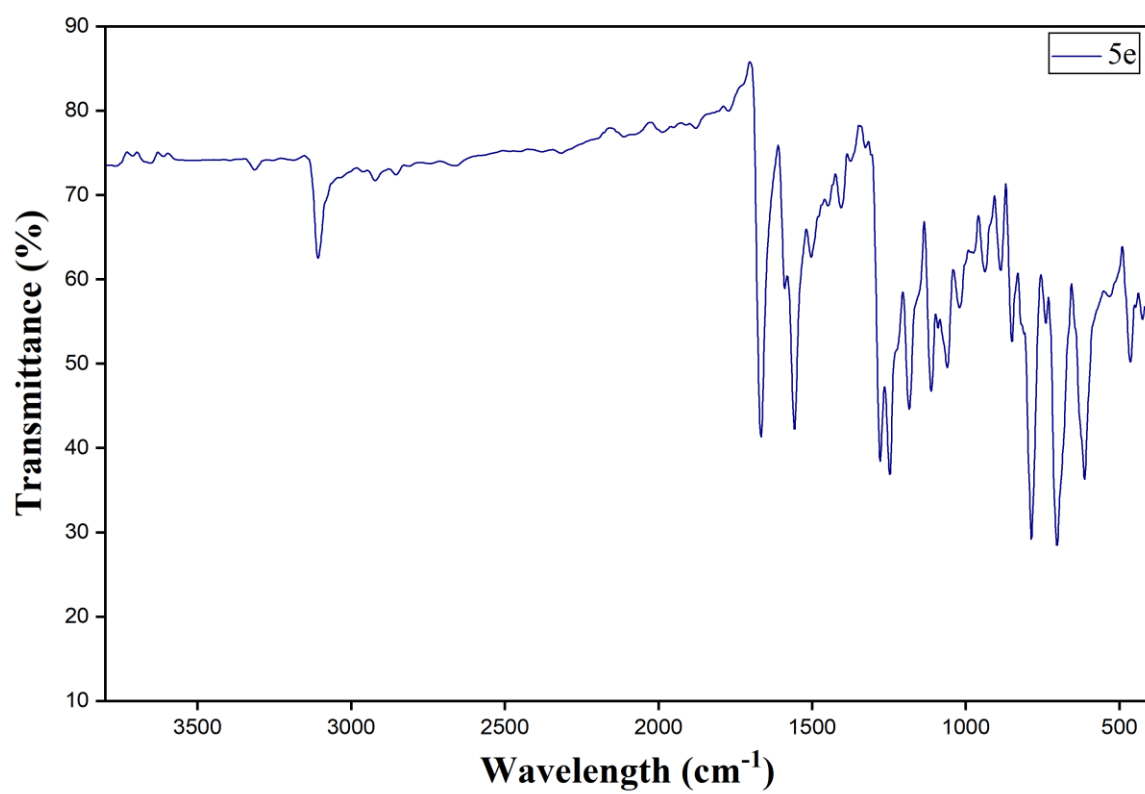

<sup>1</sup>H NMR (400 MHz, CDCl<sub>3</sub>)



**2-Chloro-3-(thiophen-2-yl)naphthalene-1,4-dione (5e).**

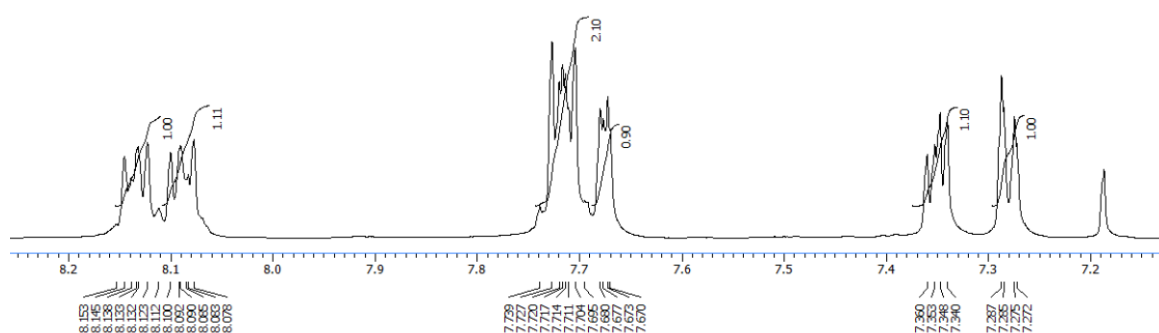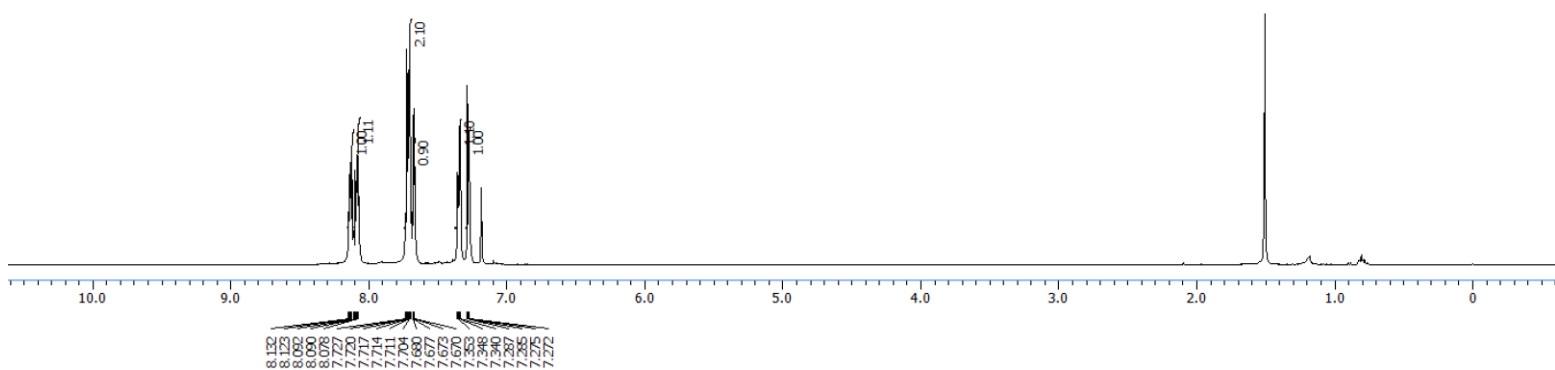

$^{13}\text{C}\{^1\text{H}\}$  NMR (100 MHz,  $\text{CDCl}_3$ )

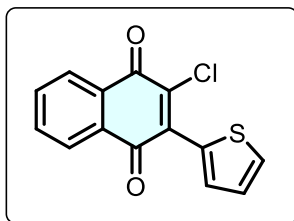

**2-Chloro-3-(thiophen-2-yl)naphthalene-1,4-dione (5e).**

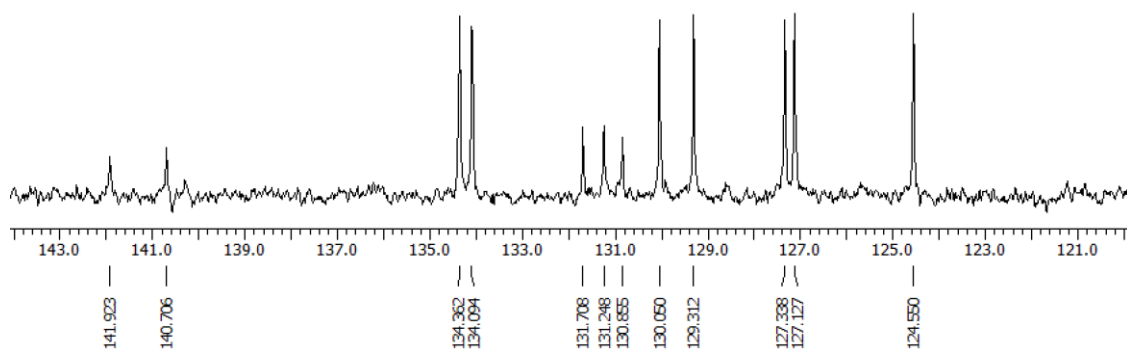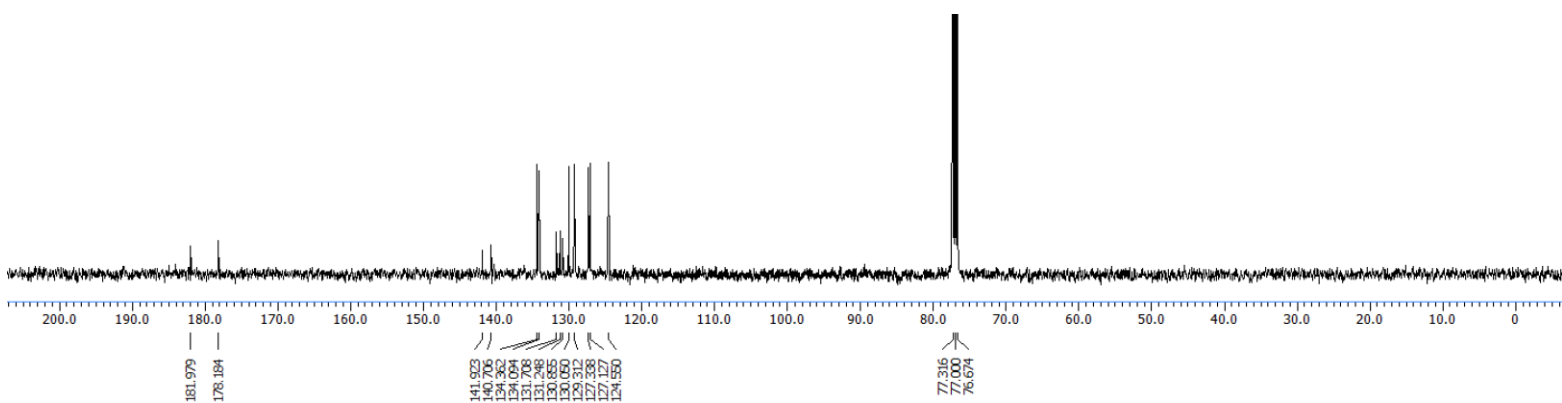



# HRMS

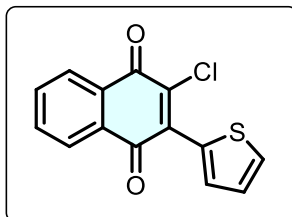

## 2-Chloro-3-(thiophen-2-yl)naphthalene-1,4-dione (5e).

### Custom Workflow Report

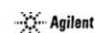

#### Sample Information

|                 |                 |                    |                                            |
|-----------------|-----------------|--------------------|--------------------------------------------|
| Sample Name     | MNS-441         | Data File Path     | D:\Projects\demo & training\Data\MNS-441.d |
| Sample ID       |                 | Acq Time (Local)   | 11-06-2025 11:36:22 (UTC+05:30)            |
| Instrument      | BIO-QTOF        | Acq Method Path    | D:\Projects\demo & training\Method\demo.m  |
| MS Type         | QTOF            | Acq SW Version     | 6500 series Q-TOF (12.1.98.0)              |
| Inj Vol (µl)    | 2               | IRM Status         | Success                                    |
| Sample Position | P1-A6           | DA Method Path     |                                            |
| Plate Position  |                 | Target Source Path |                                            |
| Acq Operator    | SYSTEM (SYSTEM) | Result Summary     | 1 qualified (1 targets)                    |

#### Sample Chromatograms

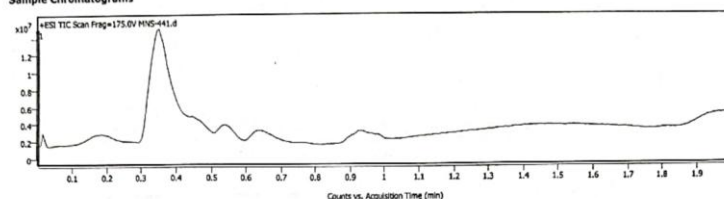

#### Sample Spectra

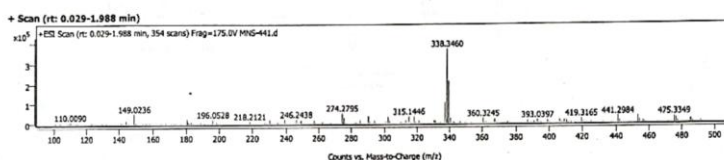

#### Compound Summary

| Cpd. Name | Formula    | RT    | Mass     | CAS | ID Source | Score | Score (Lb) | Score (DB) | Score (HFG) | Algorithm |
|-----------|------------|-------|----------|-----|-----------|-------|------------|------------|-------------|-----------|
| 1         | C14H7ClO2S | 0.950 | 273.5867 |     | FBF       | 90.95 |            |            |             | FBF       |

#### Compound Details

| Name       | Formula | RT    | RI | Mass     | Score | Algorithm | Lb/DB |
|------------|---------|-------|----|----------|-------|-----------|-------|
| C14H7ClO2S |         | 0.950 |    | 273.5867 | 90.95 | FBF       |       |

| Species            | m/z      | Score (Lb) | Num Spectra | Score (DB) | Score (HFG) | Score (RT) |
|--------------------|----------|------------|-------------|------------|-------------|------------|
| (M+H) <sup>+</sup> | 274.9940 | 296.9754   |             |            |             |            |

#### Compound Spectra

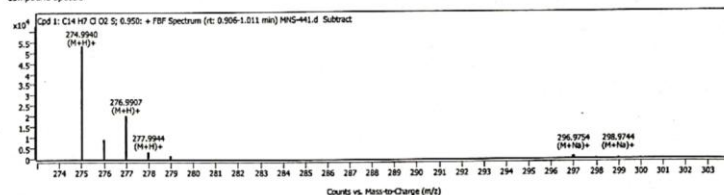

#### Spectrum Peaks

| m/z      | m/z (Calc) | Diff (ppm) | Abund | Height % | Height % (Calc) | Ion Species         | Z |
|----------|------------|------------|-------|----------|-----------------|---------------------|---|
| 274.9940 | 274.9928   | 4.44       | 53256 | 100.00   | 100.00          | (M+H) <sup>+</sup>  | 1 |
| 275.9974 | 275.9960   | 5.12       | 7936  | 14.90    | 16.10           | (M+H) <sup>+</sup>  | 1 |
| 276.9907 | 276.9901   | 2.33       | 16729 | 31.41    | 33.09           | (M+H) <sup>+</sup>  | 1 |
| 277.9944 | 277.9931   | 4.78       | 2156  | 4.99     | 5.96            | (M+H) <sup>+</sup>  | 1 |
| 278.9901 | 278.9885   | 5.61       | 970   | 1.82     | 2.04            | (M+H) <sup>+</sup>  | 1 |
| 296.9754 | 296.9747   | 2.30       | 545   | 100.00   | 100.00          | (M+Na) <sup>+</sup> | 1 |
| 297.9812 | 297.9779   | 10.82      | 81    | 14.86    | 16.09           | (M+Na) <sup>+</sup> | 1 |
| 298.9744 | 298.9720   | 8.10       | 202   | 37.00    | 38.09           | (M+Na) <sup>+</sup> | 1 |

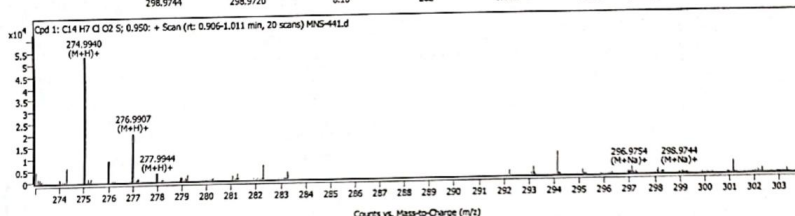

#### Spectrum Peaks

| m/z      | m/z (Calc) | Diff (ppm) | Abund | Height % | Height % (Calc) | Ion Species         | Z |
|----------|------------|------------|-------|----------|-----------------|---------------------|---|
| 274.9940 | 274.9928   | 4.44       | 53256 | 100.00   | 100.00          | (M+H) <sup>+</sup>  | 1 |
| 275.9974 | 275.9960   | 5.12       | 7936  | 14.90    | 16.10           | (M+H) <sup>+</sup>  | 1 |
| 276.9907 | 276.9901   | 2.33       | 16729 | 31.41    | 33.09           | (M+H) <sup>+</sup>  | 1 |
| 277.9944 | 277.9931   | 4.78       | 2156  | 4.99     | 5.96            | (M+H) <sup>+</sup>  | 1 |
| 278.9901 | 278.9885   | 5.61       | 970   | 1.82     | 2.04            | (M+H) <sup>+</sup>  | 1 |
| 296.9754 | 296.9747   | 2.30       | 545   | 100.00   | 100.00          | (M+Na) <sup>+</sup> | 1 |
| 297.9812 | 297.9779   | 10.82      | 81    | 14.86    | 16.09           | (M+Na) <sup>+</sup> | 1 |
| 298.9744 | 298.9720   | 8.10       | 202   | 37.00    | 38.09           | (M+Na) <sup>+</sup> | 1 |

MassHunter Qual 12.0  
(End of Report)

## IR Spectra

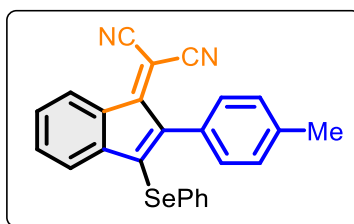

**2-(3-(phenylselanyl)-2-(p-tolyl)-1H-inden-1-ylidene)malononitrile (7).**

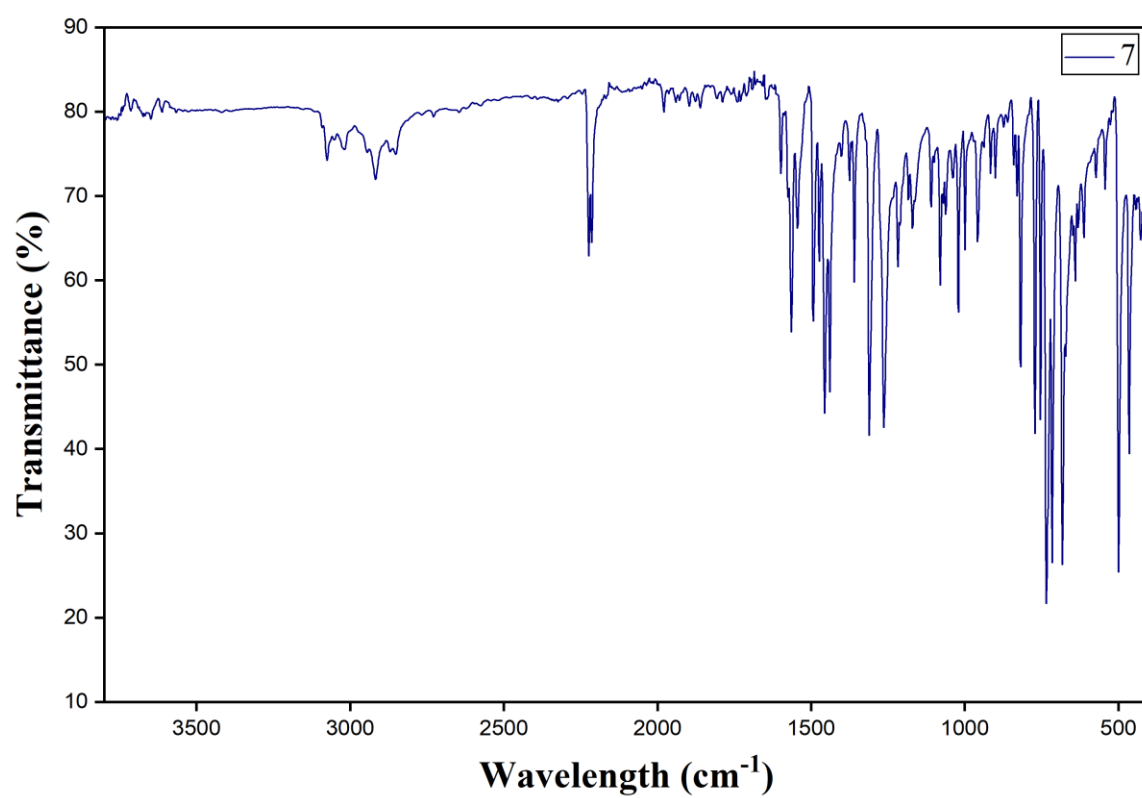

<sup>1</sup>H NMR (400 MHz, CDCl<sub>3</sub>)

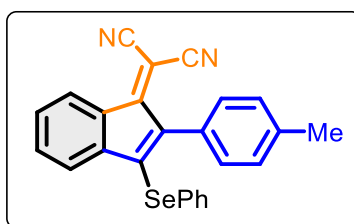

**2-(3-(phenylselanyl)-2-(p-tolyl)-1H-inden-1-ylidene)malononitrile (7).**

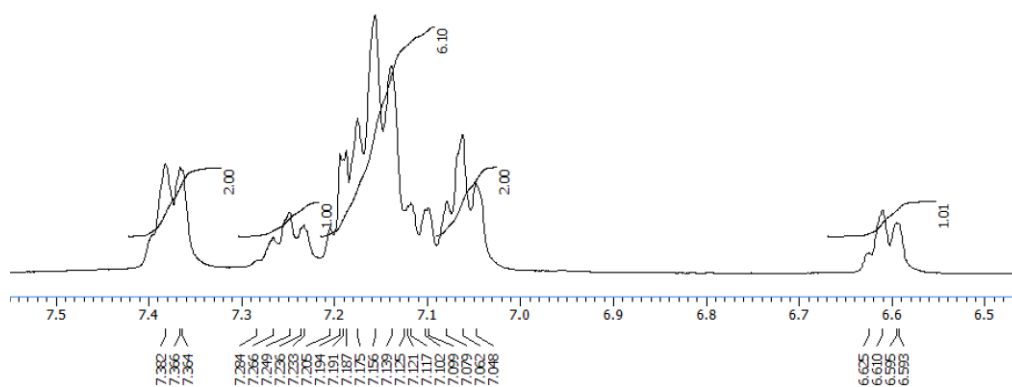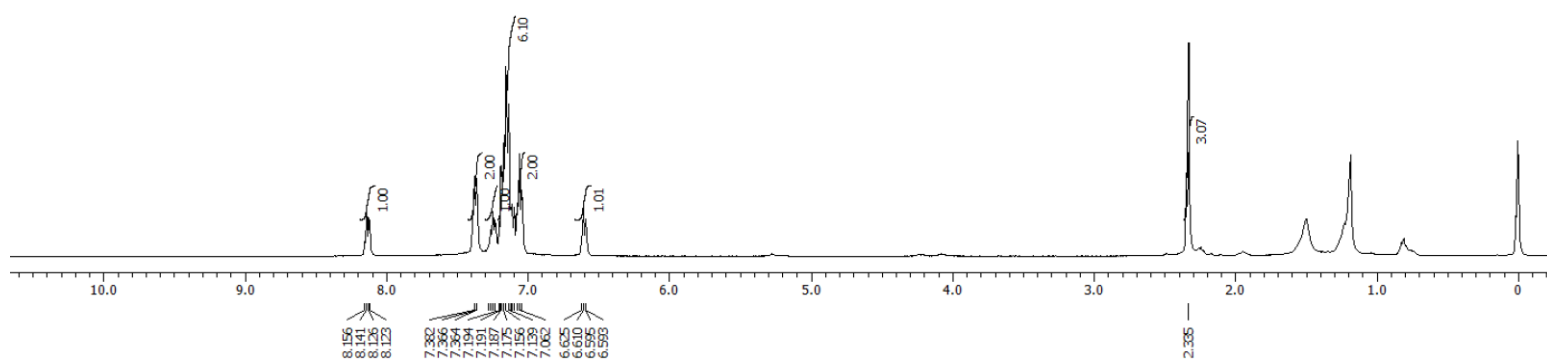

$^{13}\text{C}\{^1\text{H}\}$  NMR (100 MHz,  $\text{CDCl}_3$ )



**2-(3-(phenylselanyl)-2-(p-tolyl)-1H-inden-1-ylidene)malononitrile (7).**

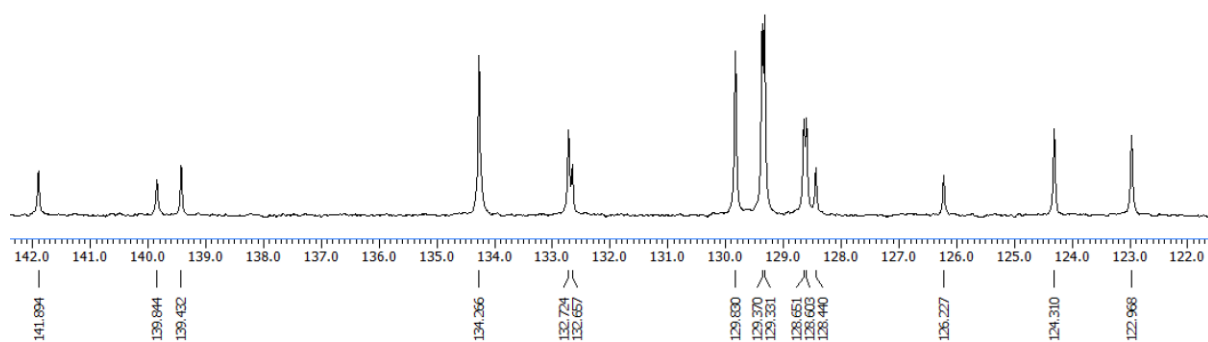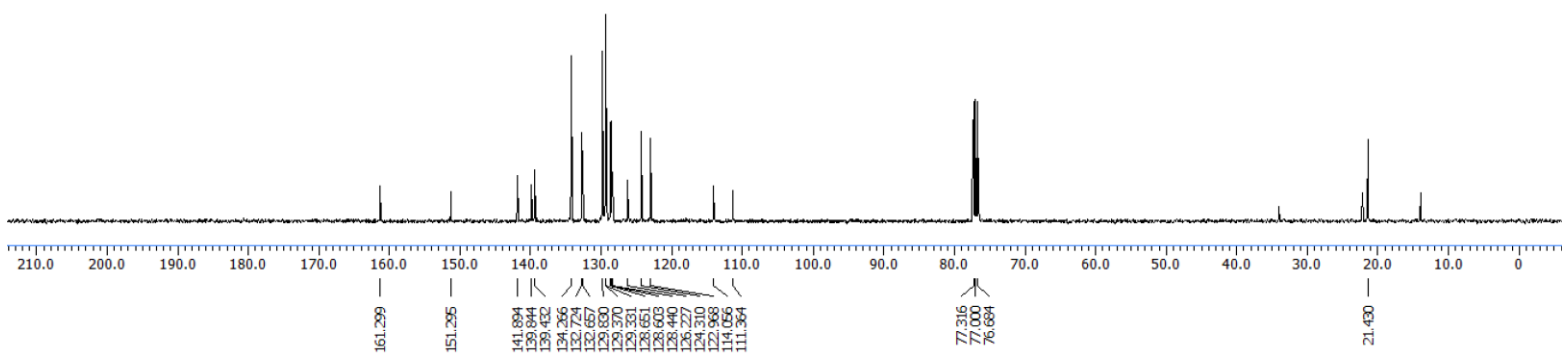

# HRMS

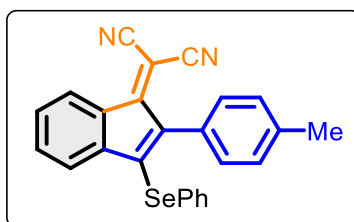

## 2-(3-(phenylselanyl)-2-(p-tolyl)-1H-inden-1-ylidene)malononitrile (7).

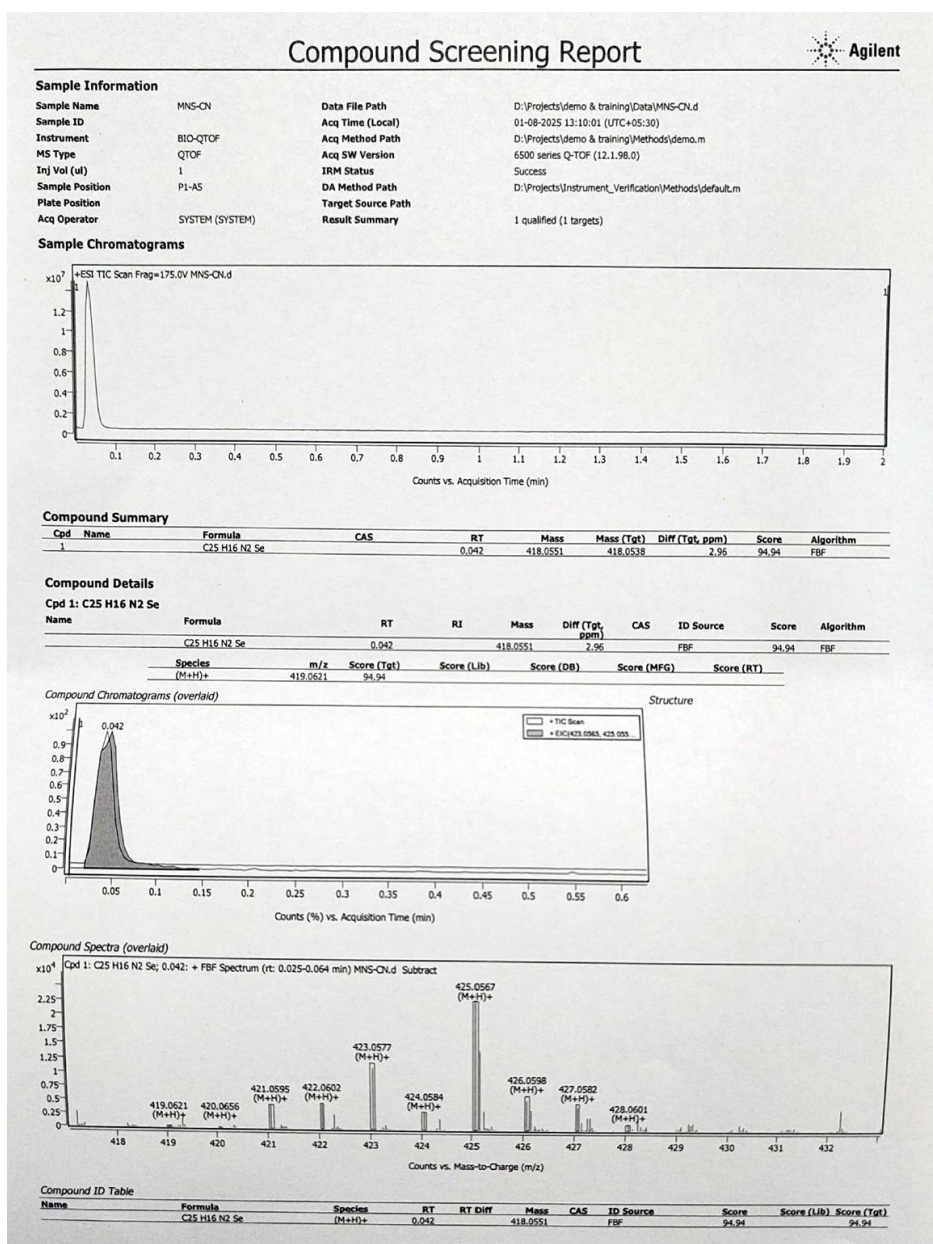

## IR Spectra

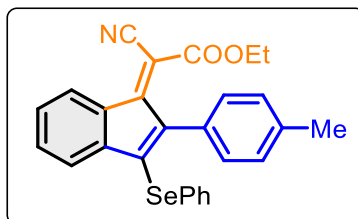

**Ethyl (Z)-2-cyano-2-(3-(phenylselanyl)-2-(p-tolyl)-1H-inden-1-ylidene)acetate (9a).**

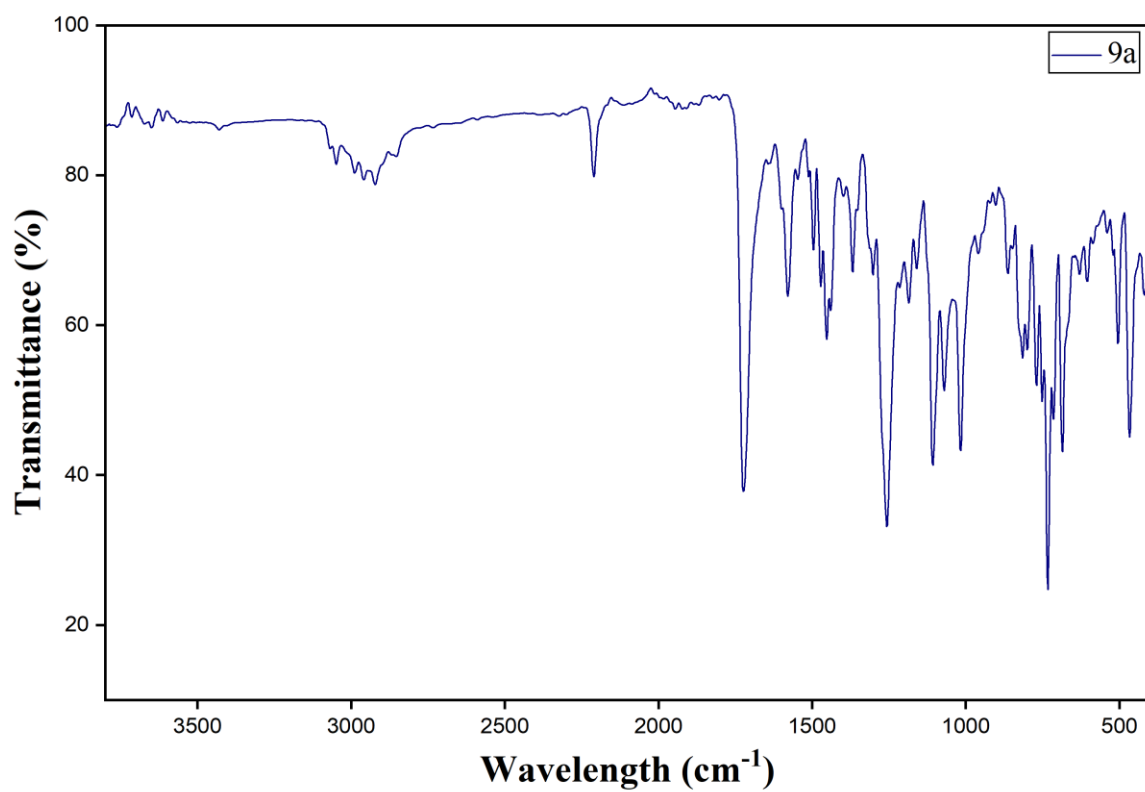

<sup>1</sup>H NMR (400 MHz, CDCl<sub>3</sub>)

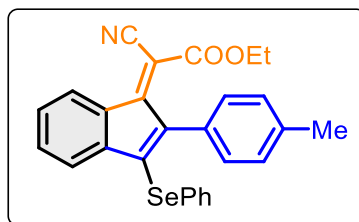

**Ethyl (Z)-2-cyano-2-(3-(phenylselanyl)-2-(p-tolyl)-1H-inden-1-ylidene)acetate (9a).**

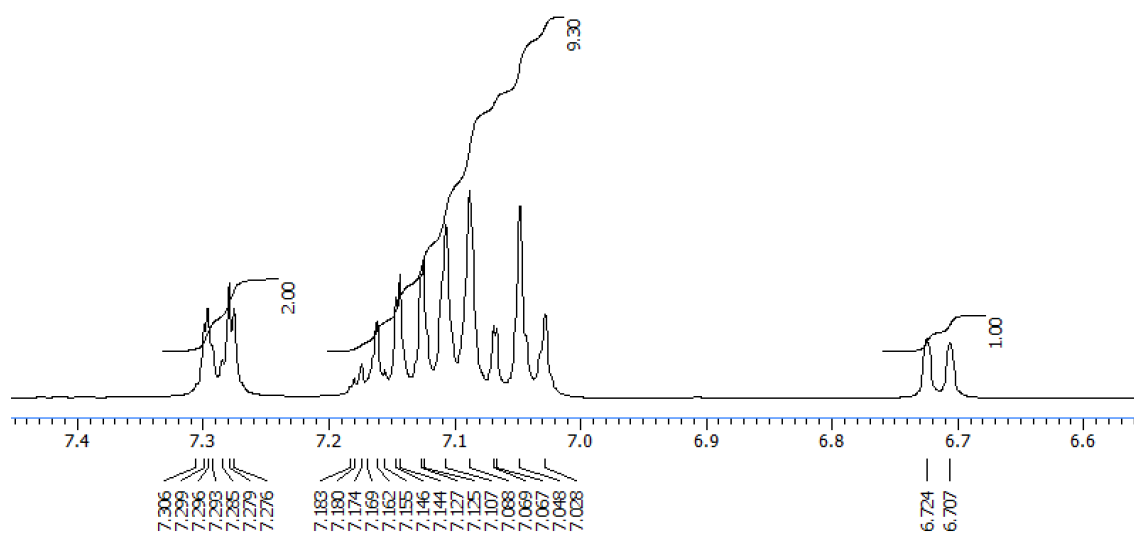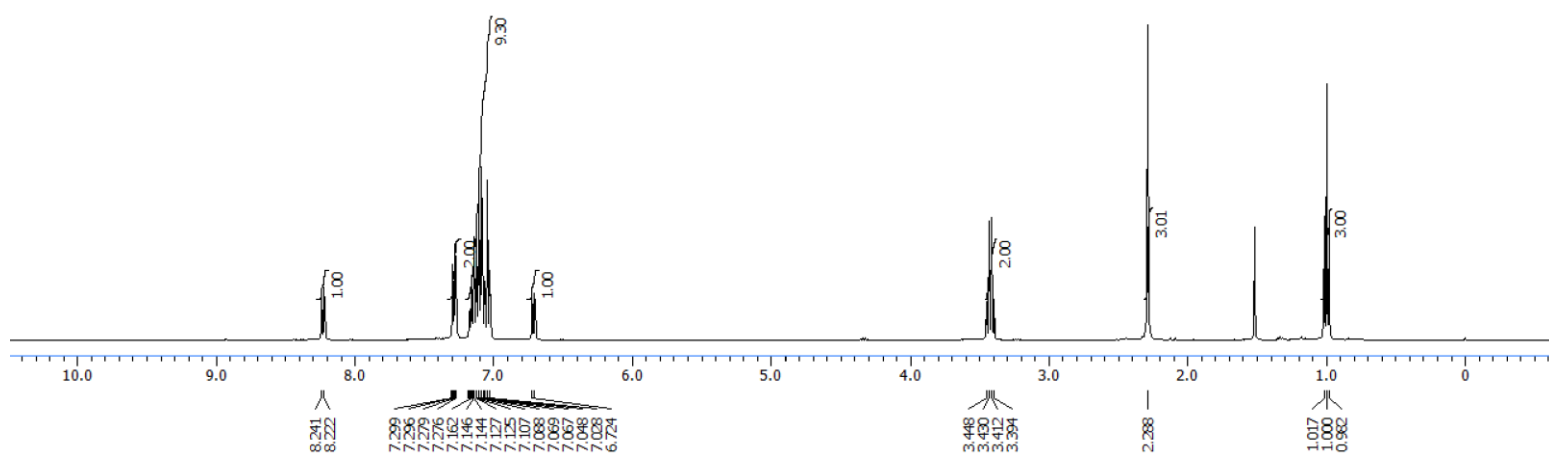

$^{13}\text{C}\{^1\text{H}\}$  NMR (100 MHz,  $\text{CDCl}_3$ )

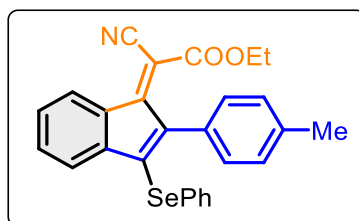

**Ethyl (Z)-2-cyano-2-(3-(phenylselanyl)-2-(p-tolyl)-1H-inden-1-ylidene)acetate (9a).**

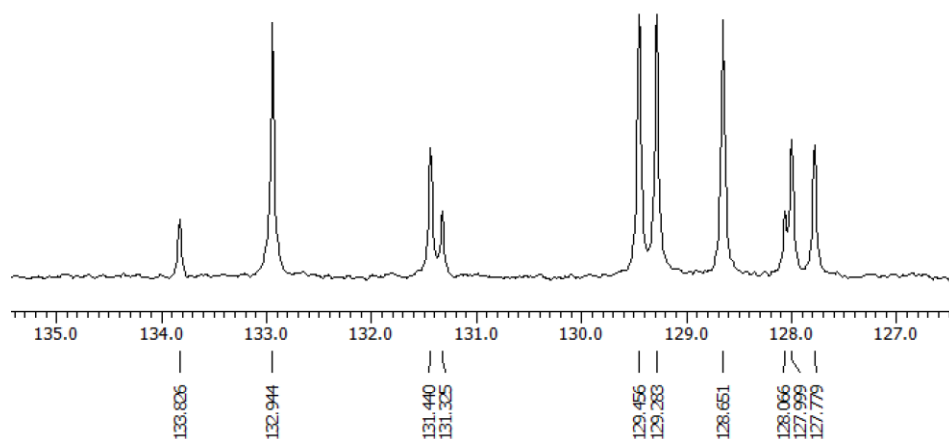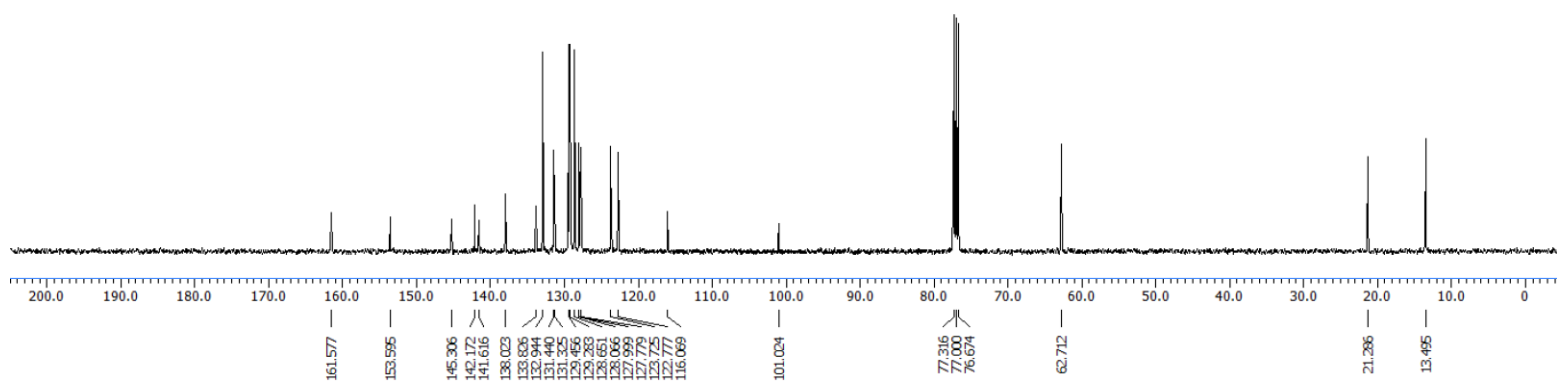



# HRMS



**Ethyl (Z)-2-cyano-2-(3-(phenylselanyl)-2-(p-tolyl)-1H-inden-1-ylidene)acetate (9a).**

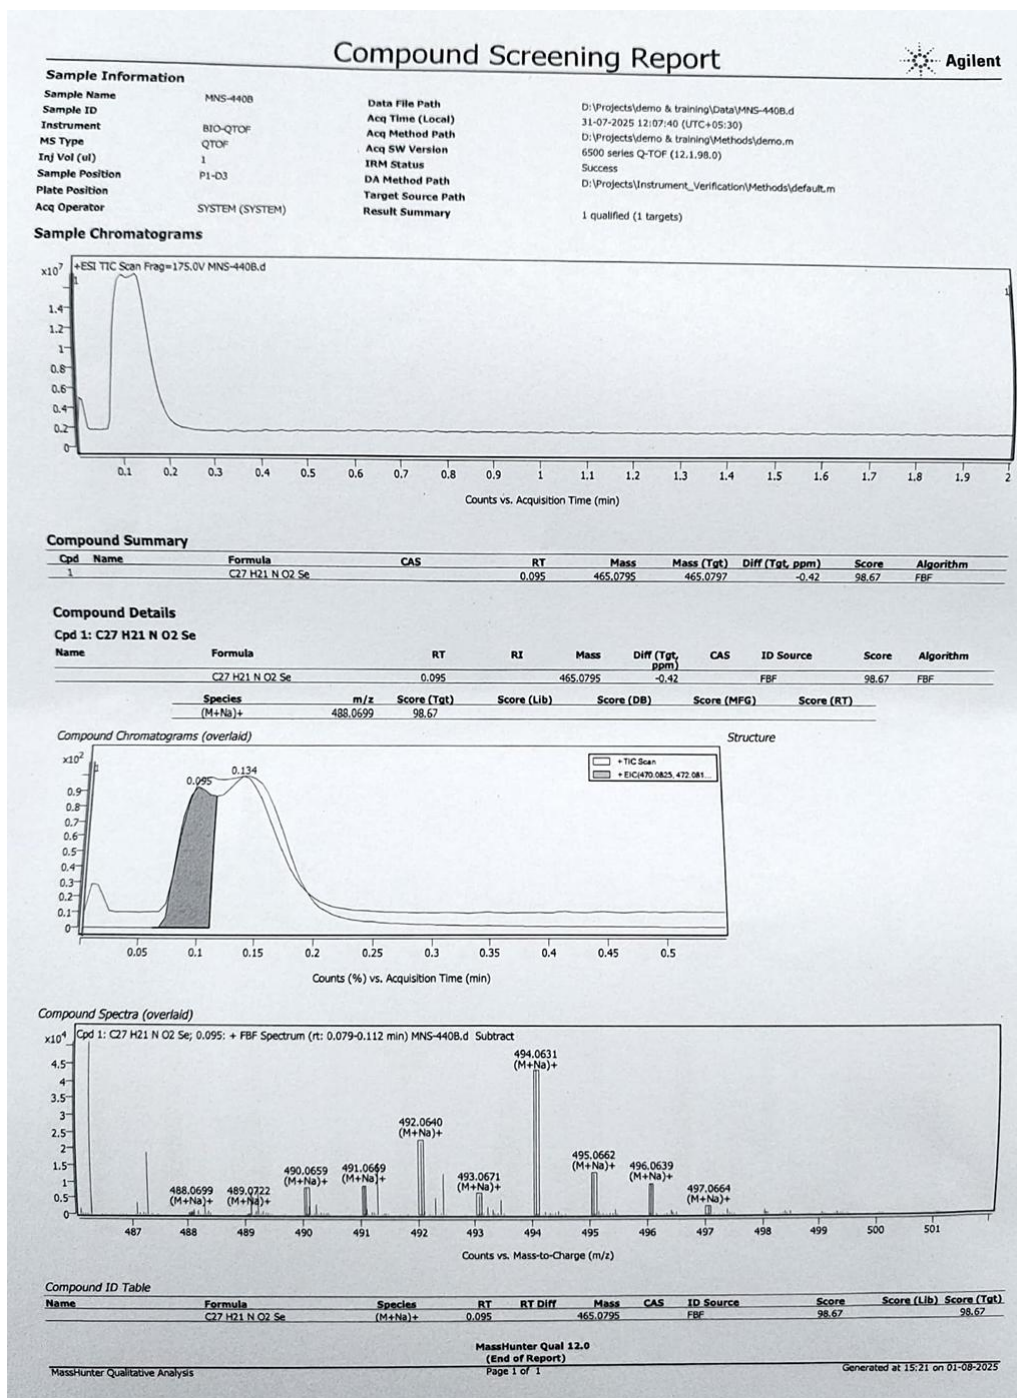

## IR Spectra

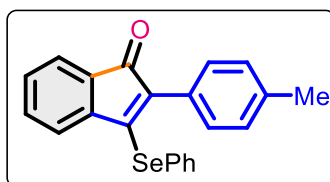

**3-(phenylselanyl)-2-(p-tolyl)-1H-inden-1-one (9b).**

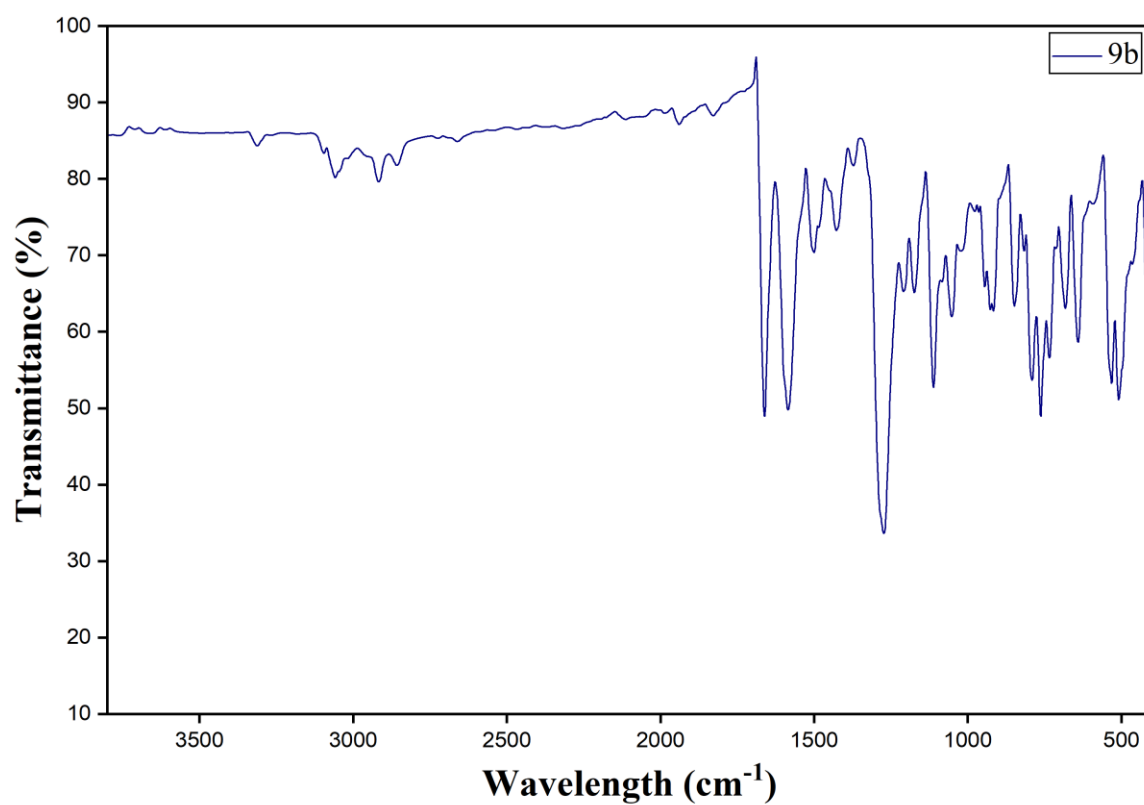

**<sup>1</sup>H NMR (400 MHz, CDCl<sub>3</sub>)**

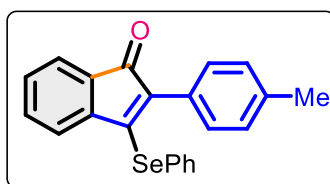

**3-(phenylselanyl)-2-(p-tolyl)-1H-inden-1-one (9b).**

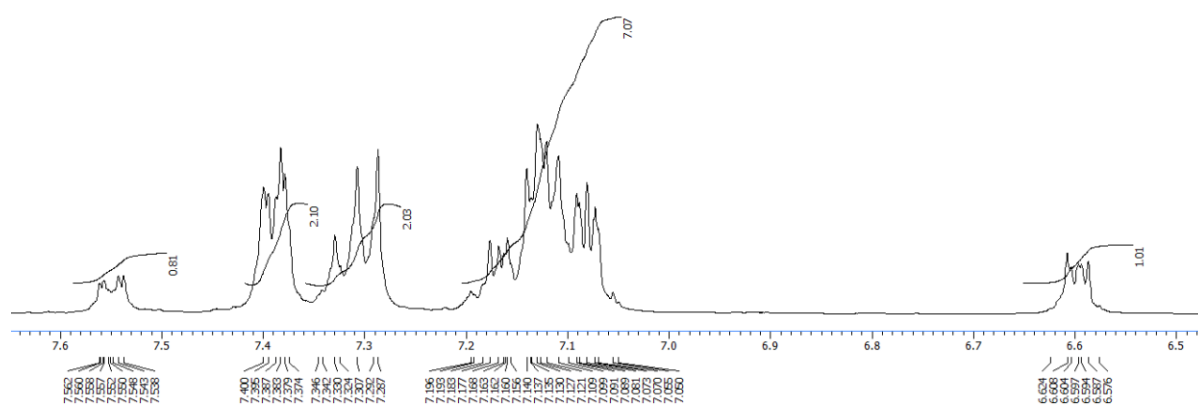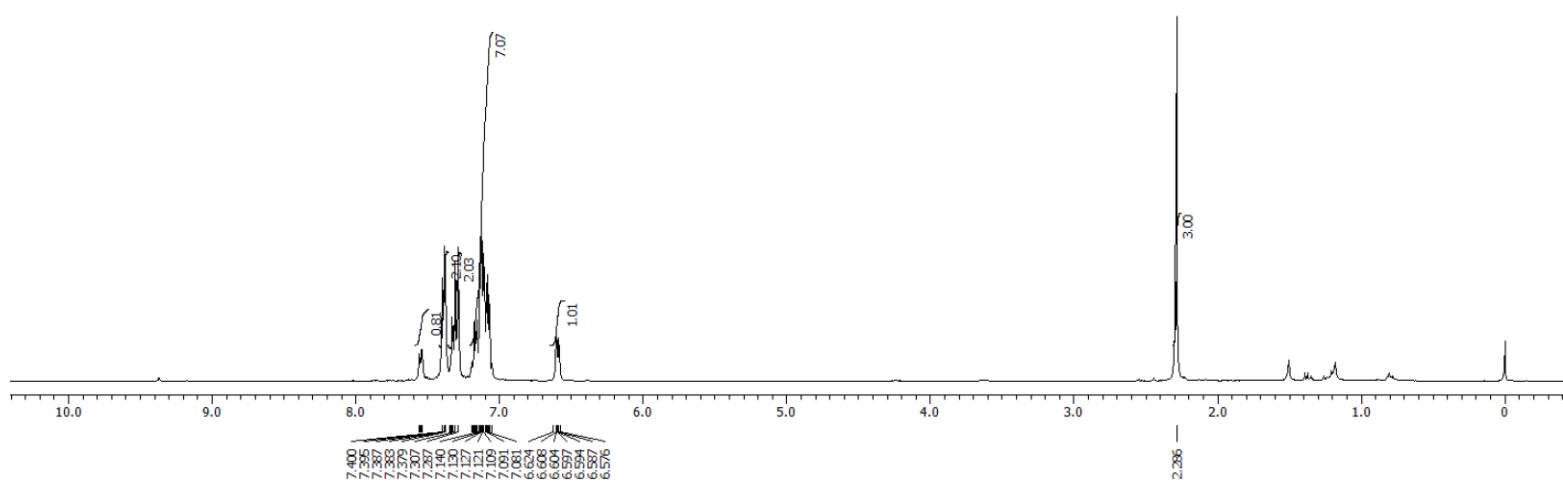

$^{13}\text{C}\{^1\text{H}\}$  NMR (100 MHz,  $\text{CDCl}_3$ )



**3-(phenylselanyl)-2-(p-tolyl)-1H-inden-1-one (9b).**

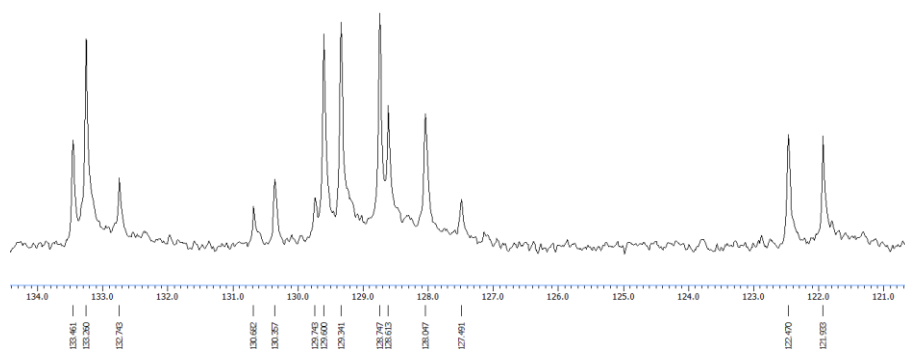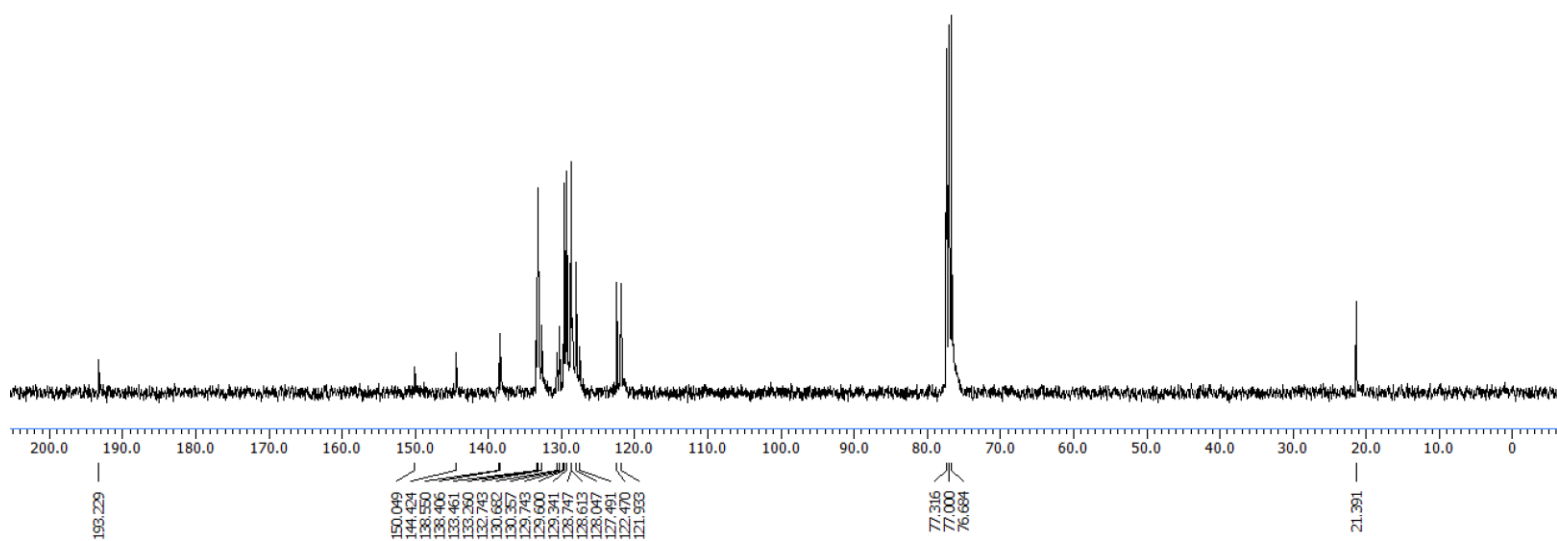

## IR Spectra

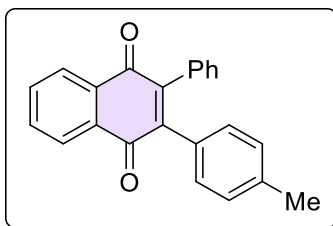

**2-phenyl-3-(*p*-tolyl)naphthalene-1,4-dione (10)**

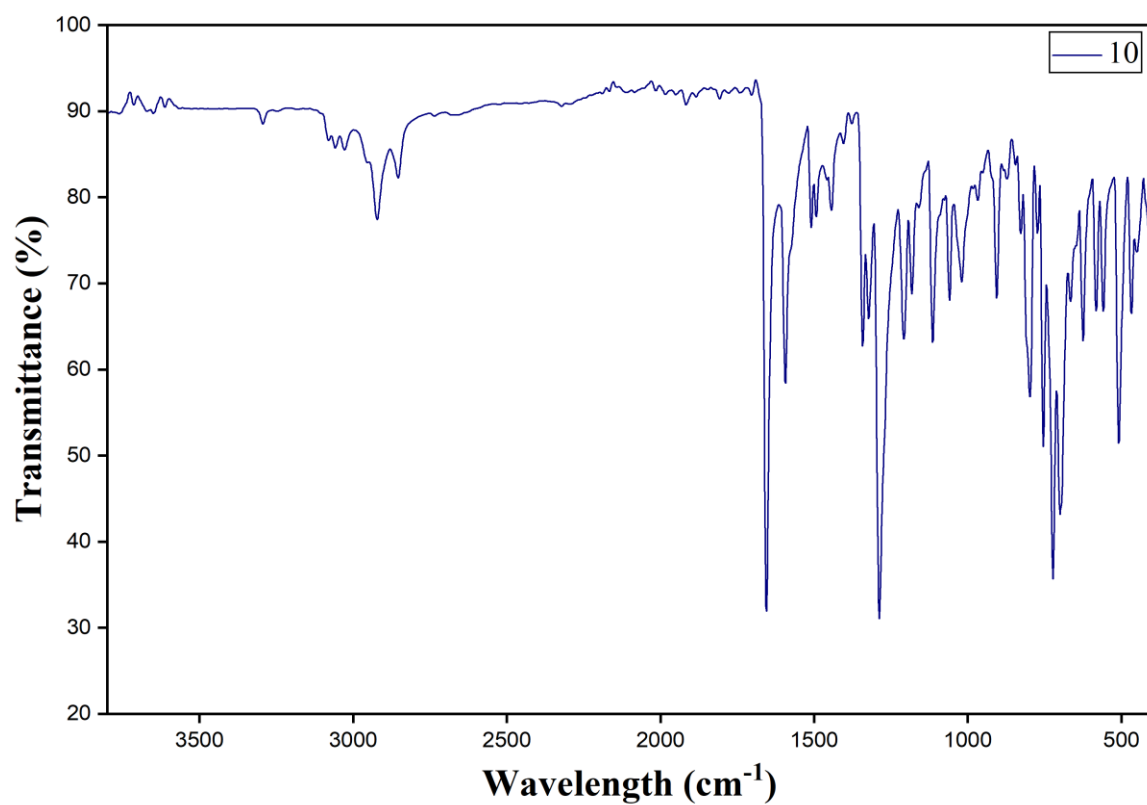

**<sup>1</sup>H NMR (400 MHz, CDCl<sub>3</sub>)**

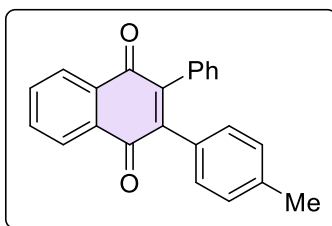

**2-phenyl-3-(*p*-tolyl)naphthalene-1,4-dione (10)**

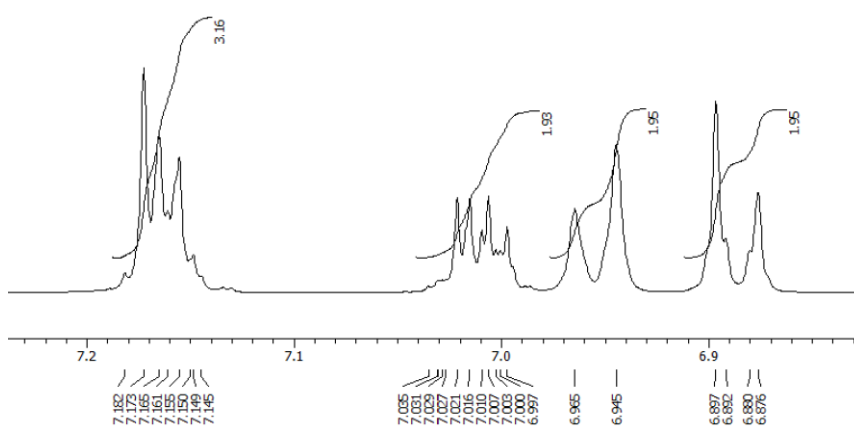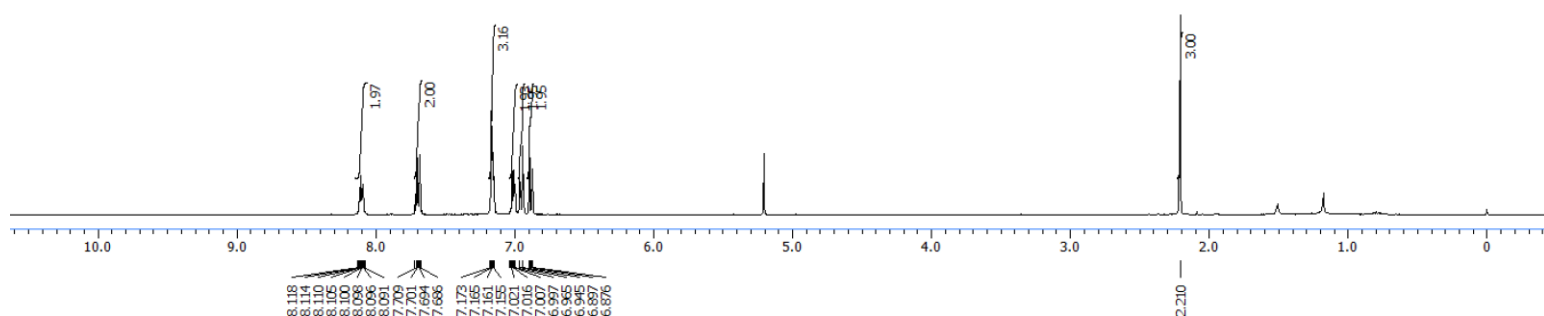

$^{13}\text{C}\{^1\text{H}\}$  NMR (100 MHz,  $\text{CDCl}_3$ )

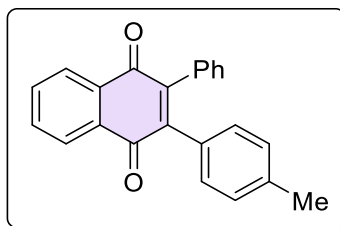

**2-phenyl-3-(*p*-tolyl)naphthalene-1,4-dione (10)**

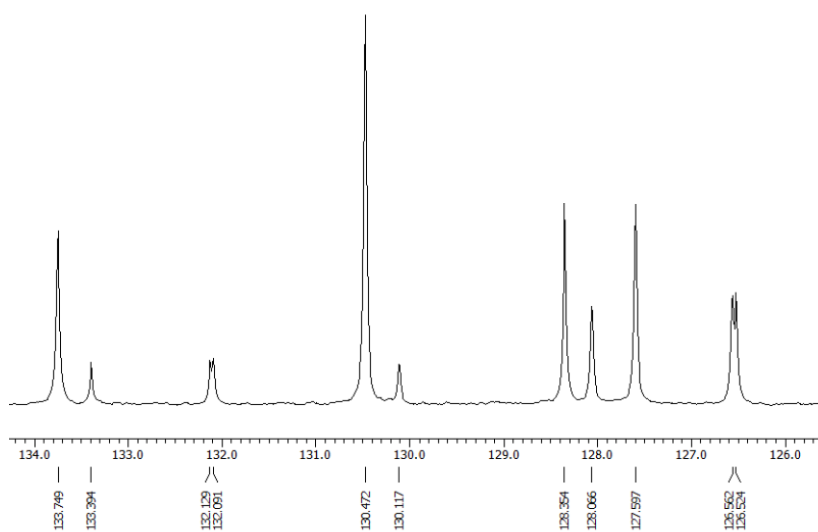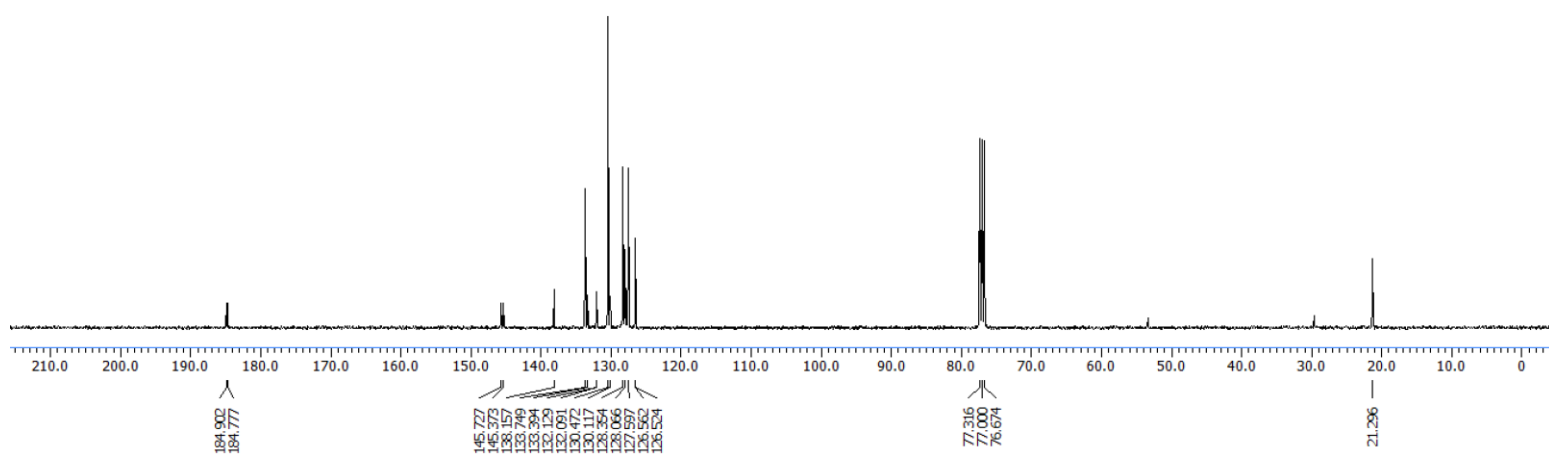

# HRMS

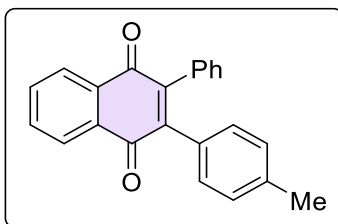

## 2-phenyl-3-(p-tolyl)naphthalene-1,4-dione (10)

### Qualitative Compound Report

Data File: MNS-328.d  
Sample Type: Sample  
Instrument Name: Instrument 1  
Acq Method: MS Scan.m  
IRM Calibration Status: Success  
Comment:

Sample Name: MNS-328  
Position: P1-C1  
User Name:  
Acquired Time: 08-03-2025 12:45:04  
DA Method: Default.m

Sample Group: Info. 3  
Acquisition SW: 6200 series TOF/6500 series  
Version: Q-TOF B.05.01 (05125)

| Compound Label    | RT    | Mass     | Abund  | Formula    | Tgt Mass | Diff (ppm) | MFG Formula | DB Formula |
|-------------------|-------|----------|--------|------------|----------|------------|-------------|------------|
| Cpd 1: C23 H16 O2 | 0.152 | 324.1162 | 110550 | C23 H16 O2 | 324.115  | 3.68       | C23 H16 O2  | C23 H16 O2 |

| Compound Label    | m/z      | RT    | Algorithm       | Mass     |
|-------------------|----------|-------|-----------------|----------|
| Cpd 1: C23 H16 O2 | 325.1235 | 0.152 | Find By Formula | 324.1162 |

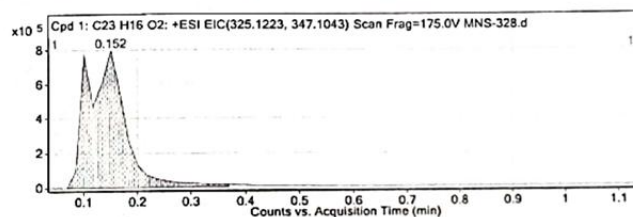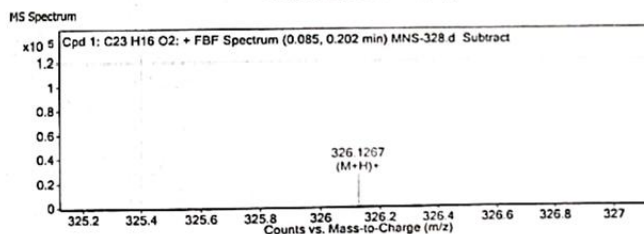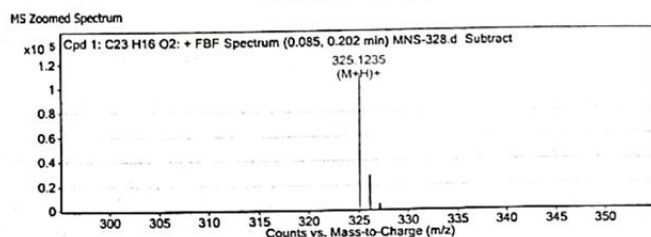

| m/z      | z | Abund     | Formula  | Ion    |
|----------|---|-----------|----------|--------|
| 325.1235 | 1 | 110550.06 | C23H17O2 | (M+H)+ |
| 326.1267 | 1 | 26070.9   | C23H17O2 | (M+H)+ |
| 327.131  | 1 | 3960.02   | C23H17O2 | (M+H)+ |

--- End Of Report ---



## IR Spectra

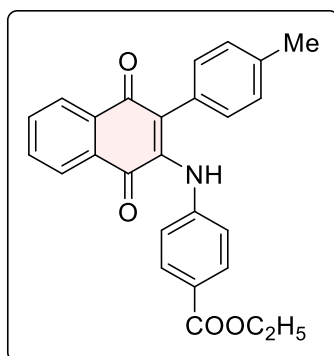

ethyl 4-((1,4-dioxo-3-(*p*-tolyl)-1,4-dihydronaphthalen-2-yl)amino)benzoate (11)

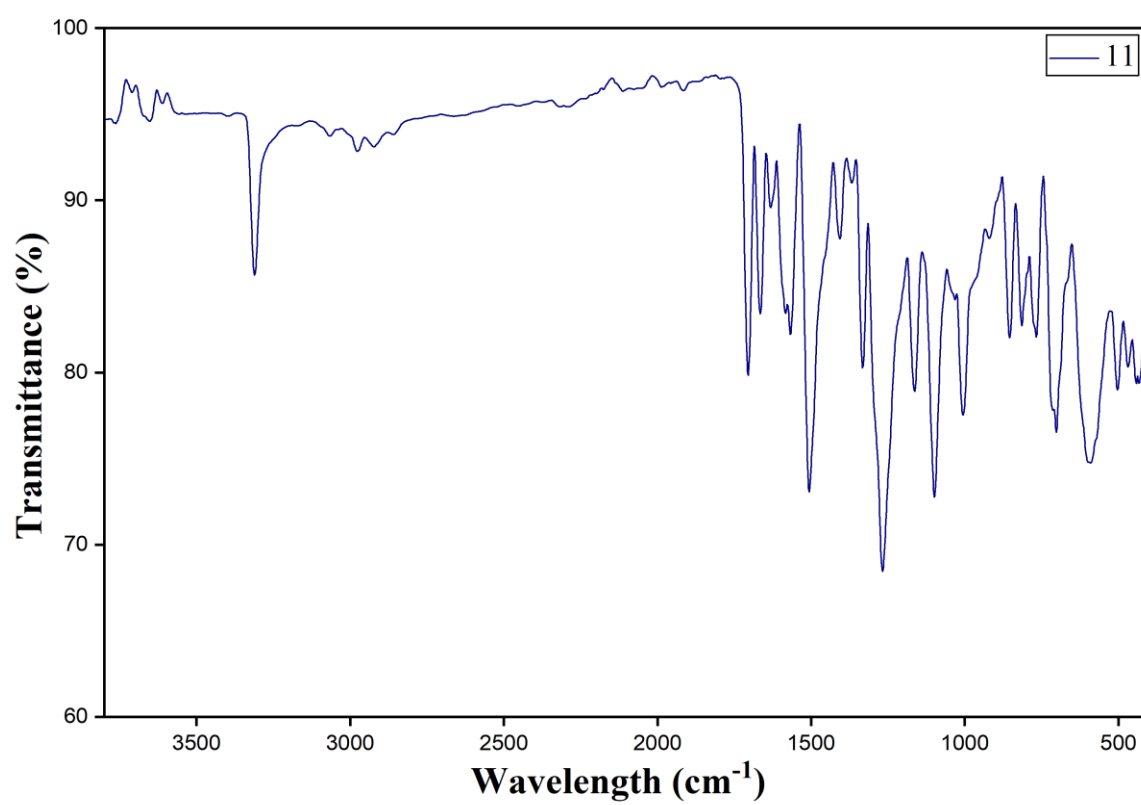

<sup>1</sup>H NMR (400 MHz, CDCl<sub>3</sub>)

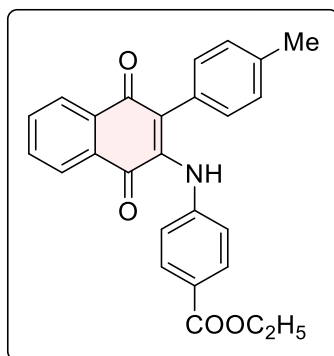

ethyl 4-((1,4-dioxo-3-(*p*-tolyl)-1,4-dihydronaphthalen-2-yl)amino)benzoate (11)

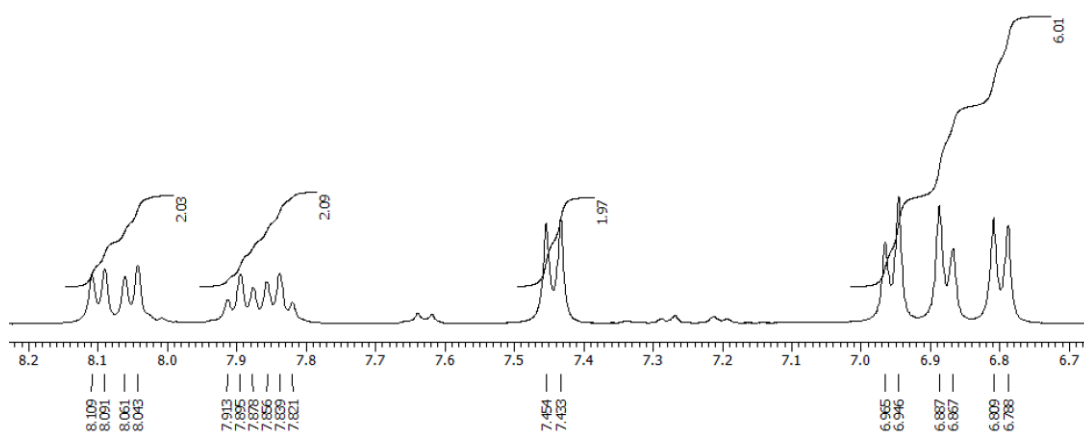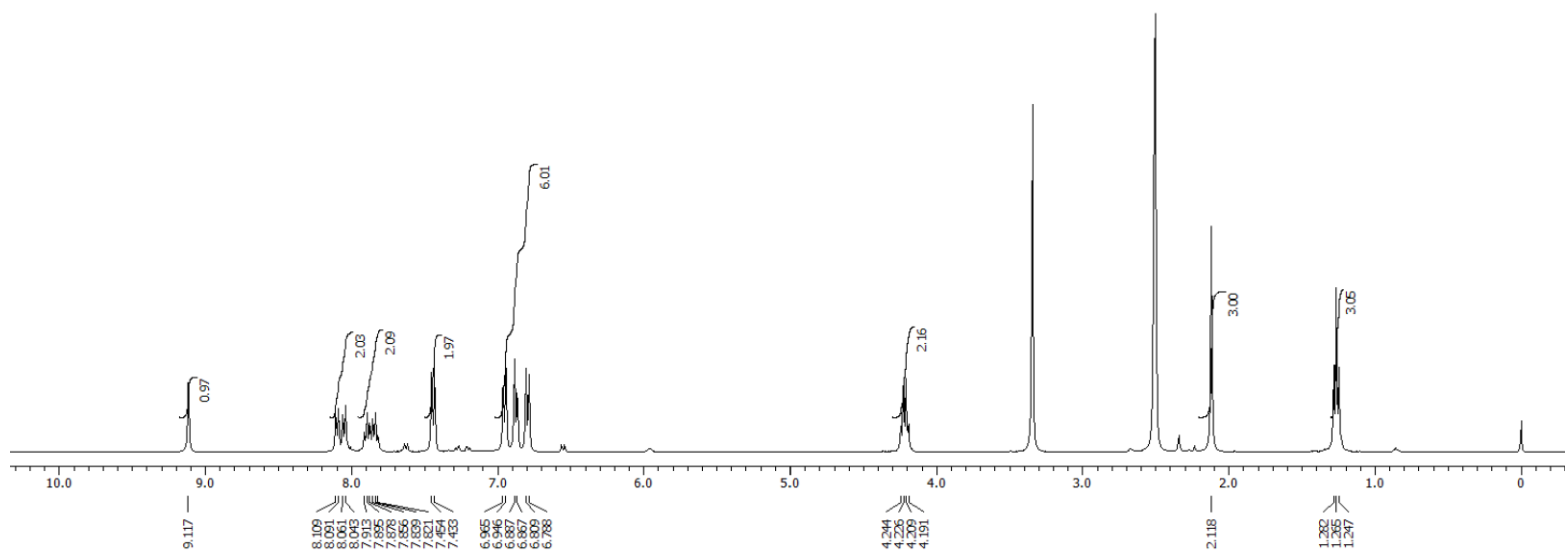

$^{13}\text{C}\{^1\text{H}\}$  NMR (100 MHz,  $\text{CDCl}_3$ )

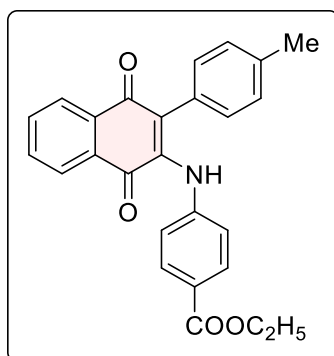

ethyl 4-((1,4-dioxo-3-(*p*-tolyl)-1,4-dihydronaphthalen-2-yl)amino)benzoate (11)

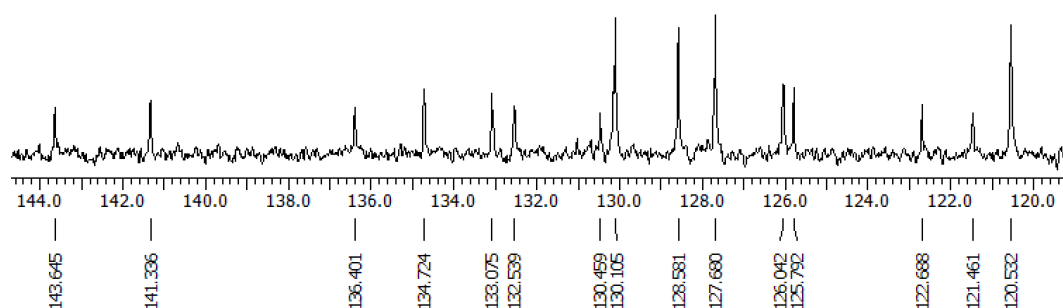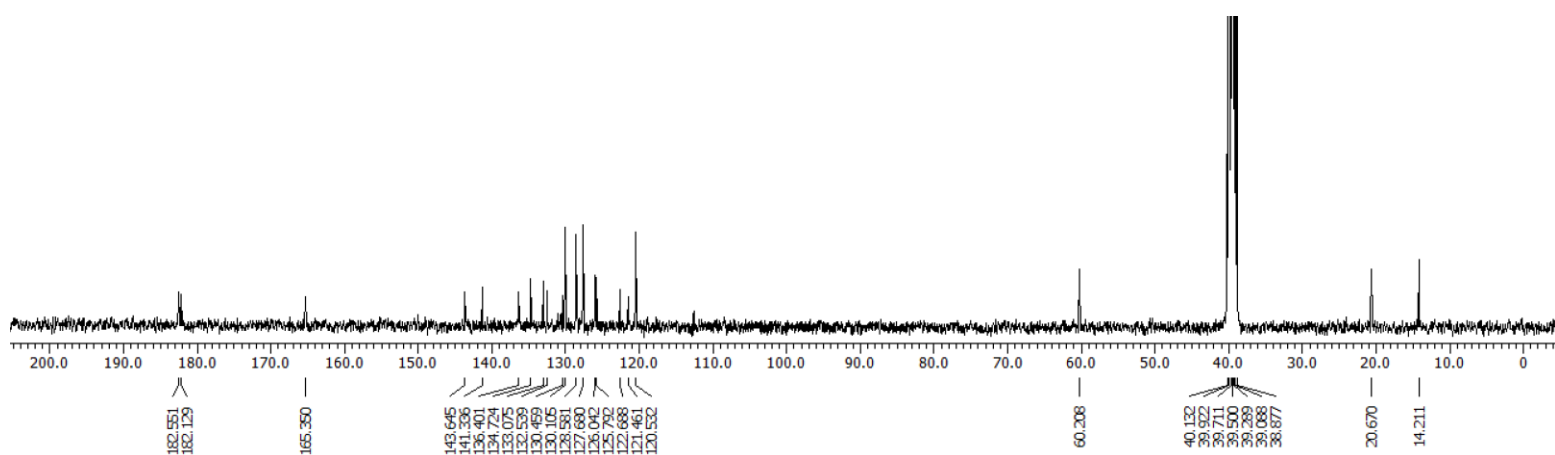

## HRMS

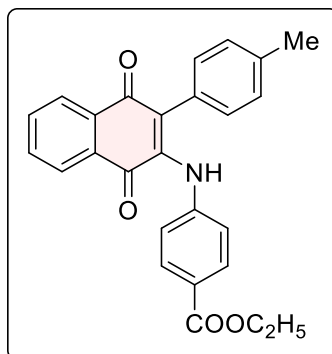

ethyl 4-((1,4-dioxo-3-(*p*-tolyl)-1,4-dihydronaphthalen-2-yl)amino)benzoate (11)

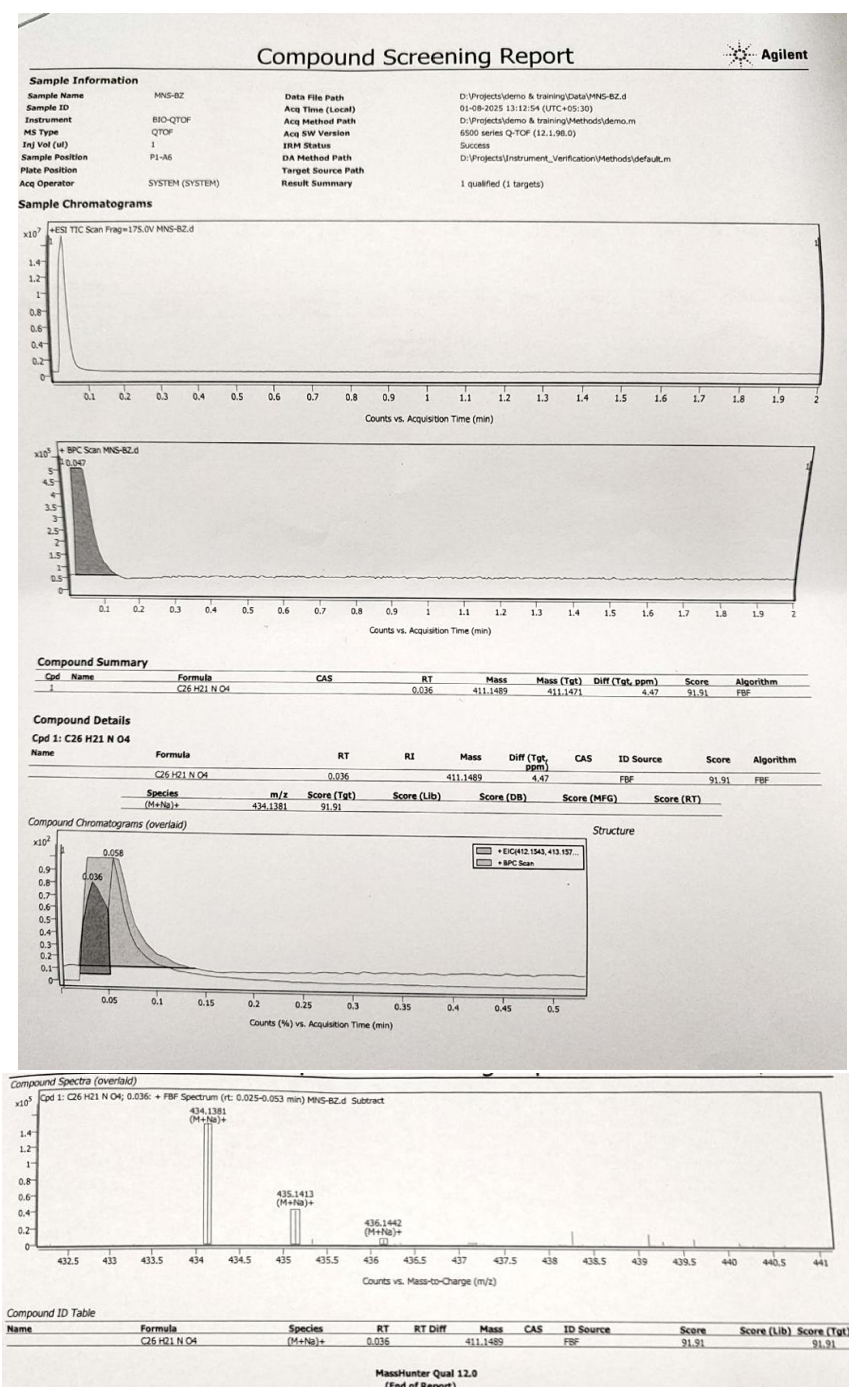

<sup>1</sup>H NMR (400 MHz, CDCl<sub>3</sub>)

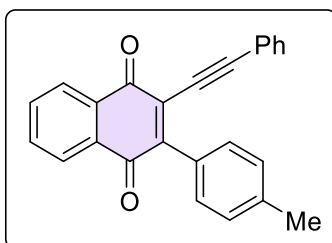

**2-(phenylethynyl)-3-(*p*-tolyl)naphthalene-1,4-dione (12)**

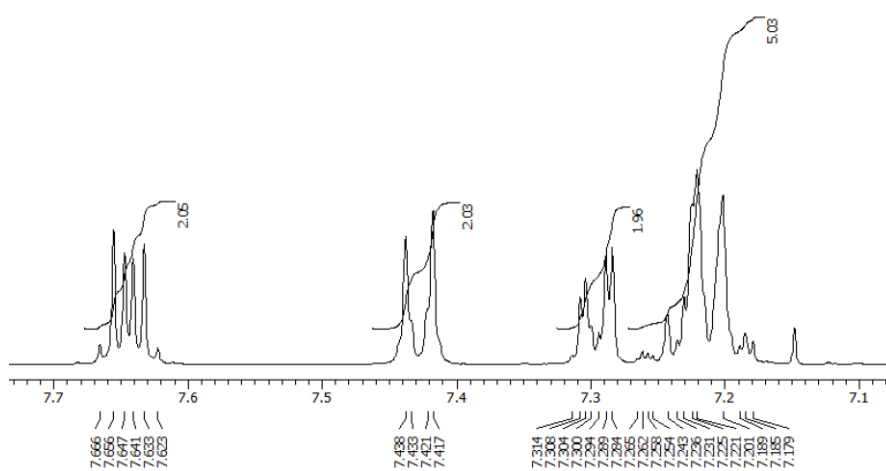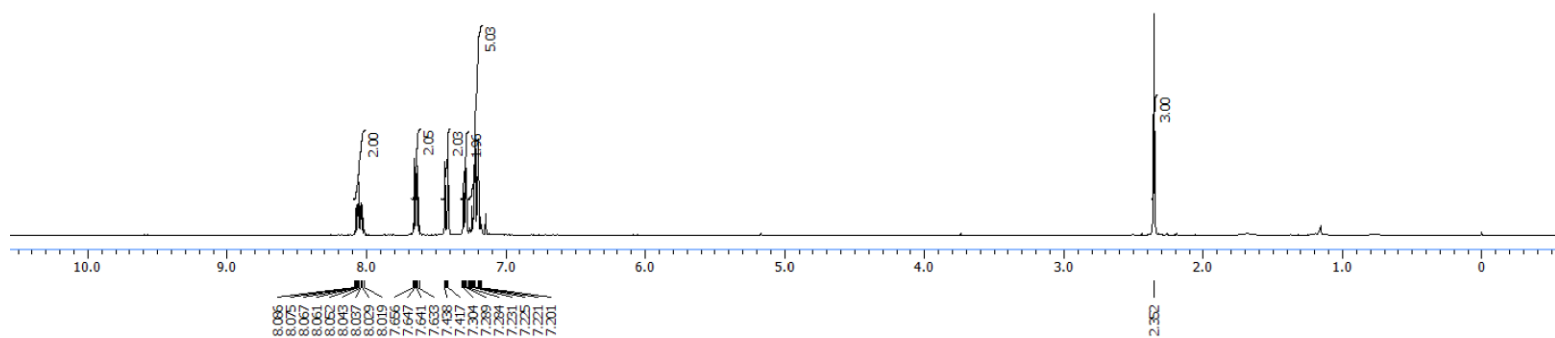

$^{13}\text{C}\{^1\text{H}\}$  NMR (100 MHz,  $\text{CDCl}_3$ )

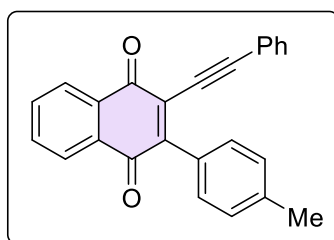

**2-(phenylethynyl)-3-(*p*-tolyl)naphthalene-1,4-dione (12)**

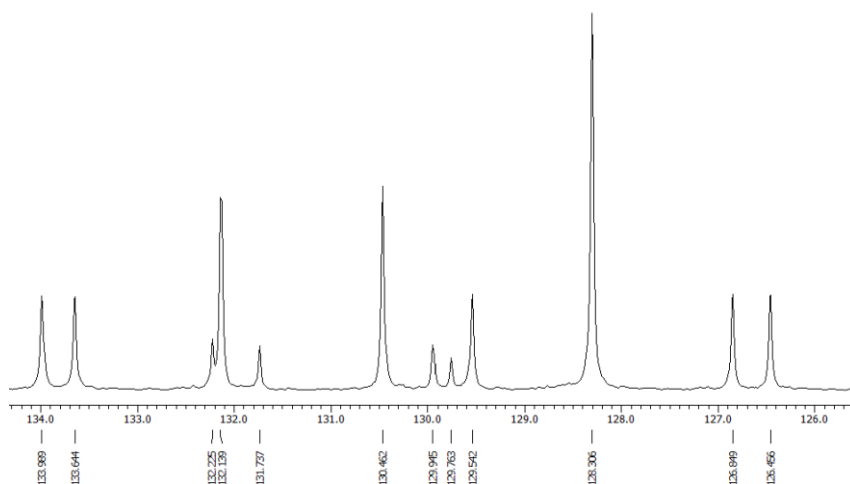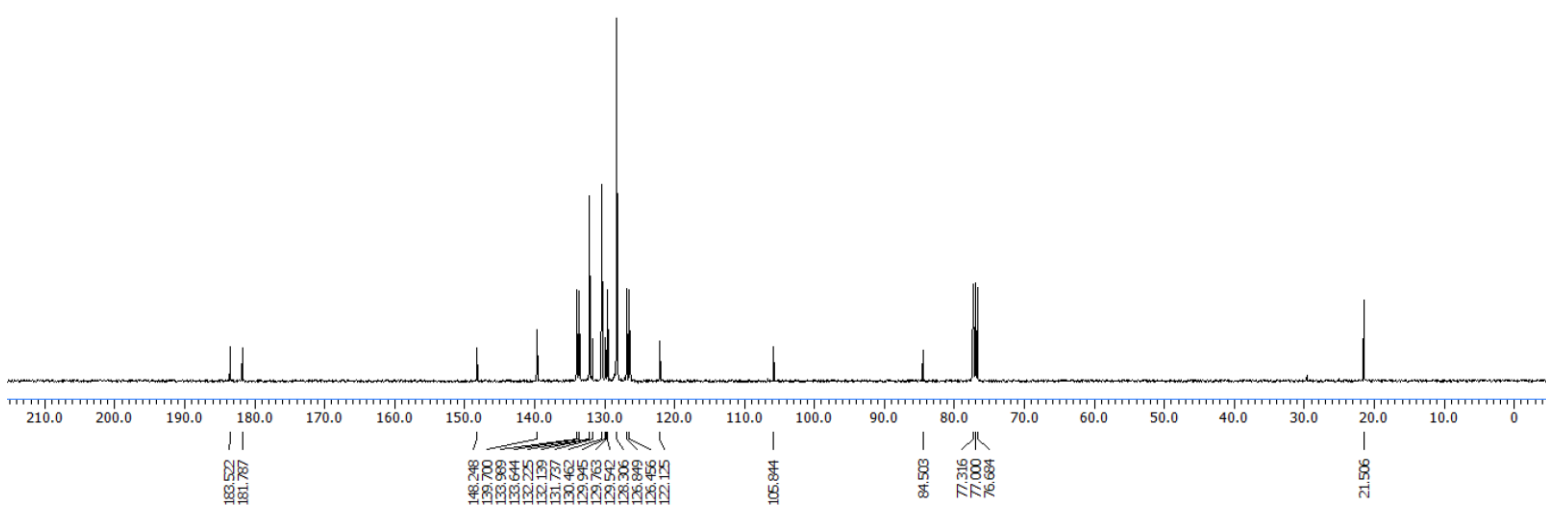

**$^1\text{H}$  NMR (400 MHz,  $\text{CDCl}_3$ )**

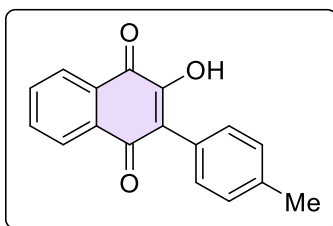

**2-hydroxy-3-(*p*-tolyl)naphthalene-1,4-dione (13)**

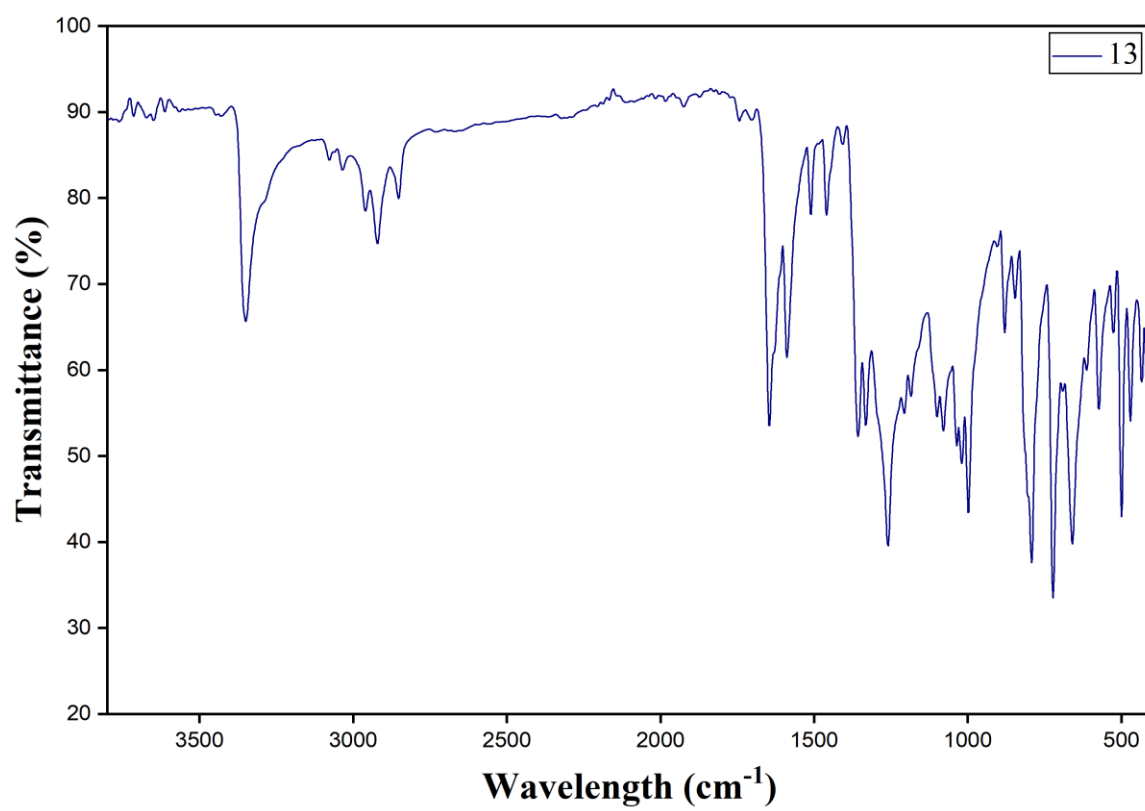

<sup>1</sup>H NMR (400 MHz, CDCl<sub>3</sub>)

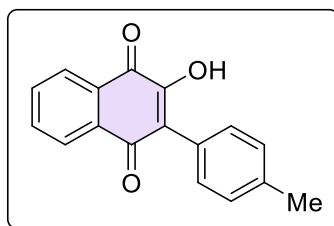

2-hydroxy-3-(*p*-tolyl)naphthalene-1,4-dione (13)

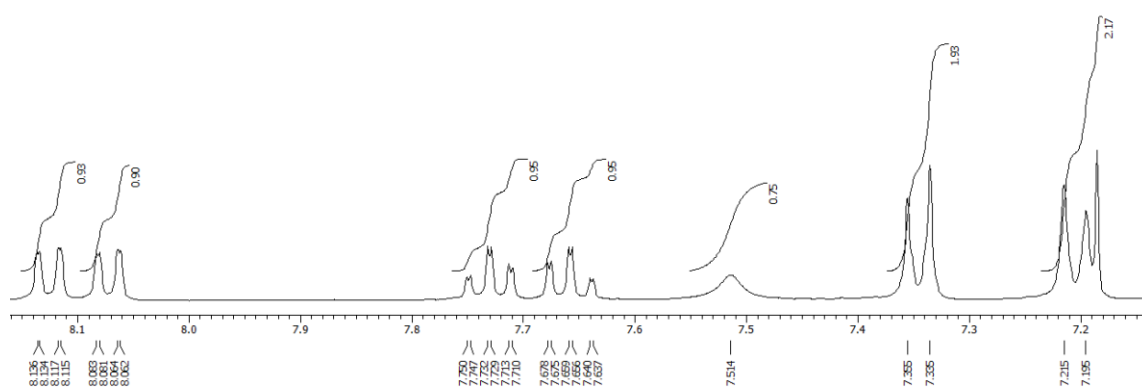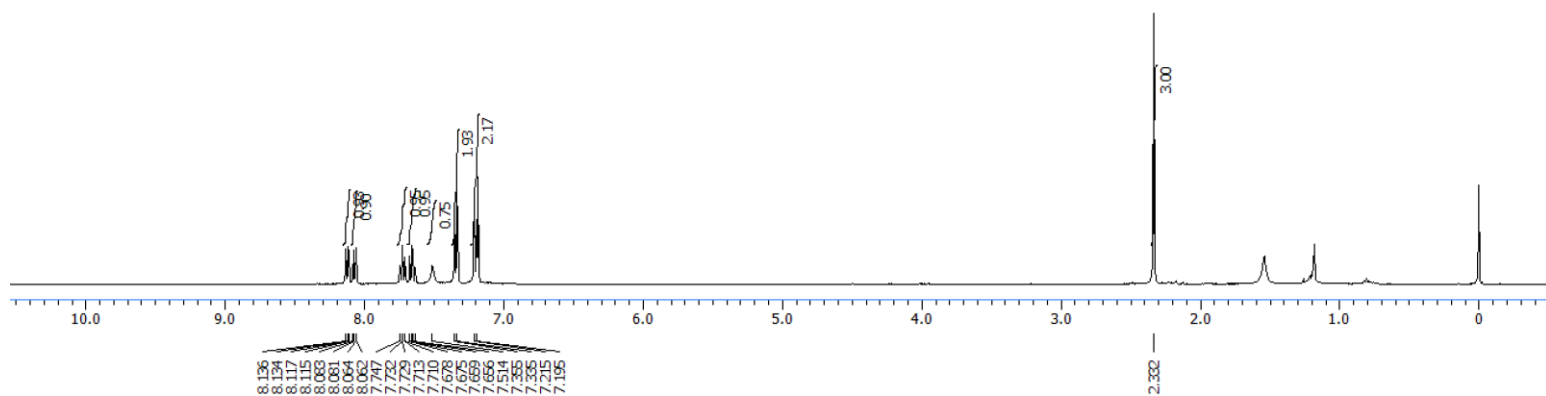



$^{13}\text{C}\{^1\text{H}\}$  NMR (100 MHz,  $\text{CDCl}_3$ )

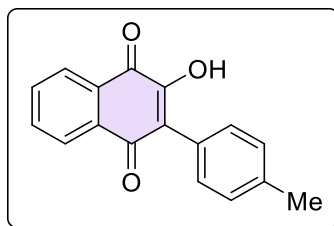

**2-hydroxy-3-(*p*-tolyl)naphthalene-1,4-dione (13)**

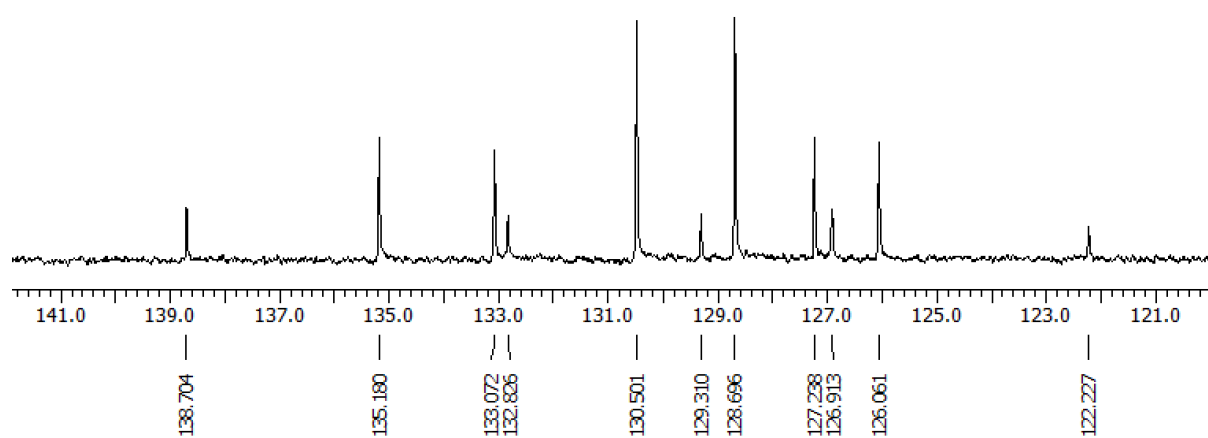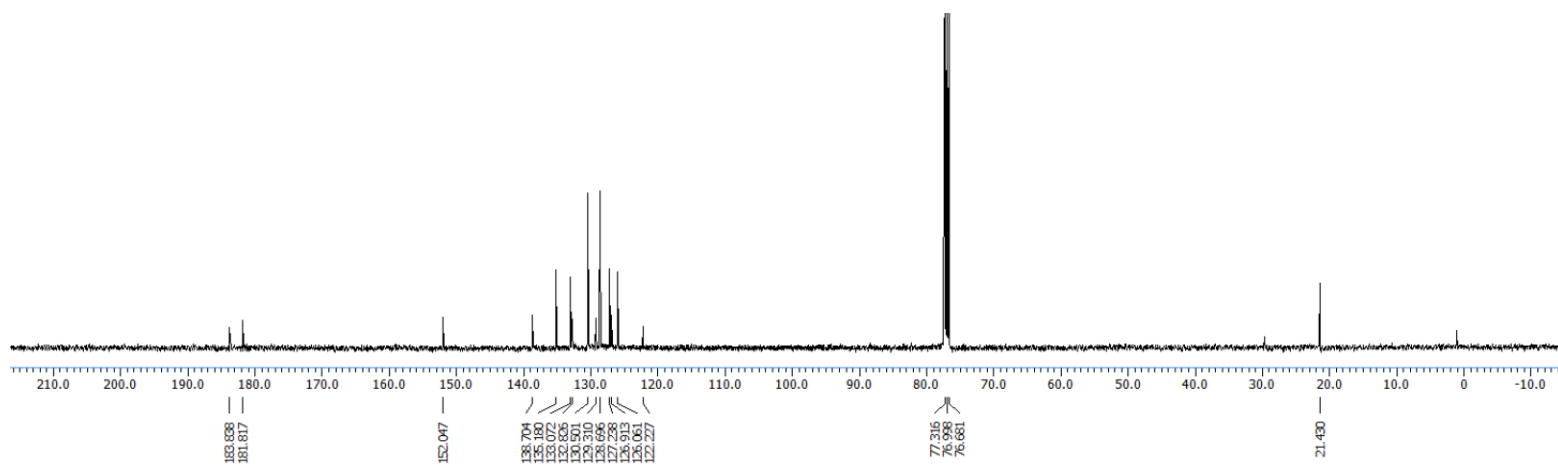

# HRMS

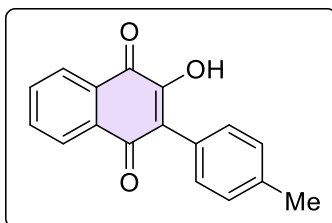

**2-hydroxy-3-(*p*-tolyl)naphthalene-1,4-dione (13)**

## Qualitative Compound Report

Data File: MNS-SYSO.d  
Sample Type: Sample  
Instrument Name: Instrument 1  
Acq Method: MS Scan.m  
IRM Calibration Status: Success  
Comment:

Sample Name: MNS-SYSO  
Position: PI-C2  
User Name:  
Acquired Time: 08-03-2025 12:48:02  
DA Method: Default.m

Sample Group: Info. 3  
Acquisition SW: 6200 series TOF/6500 series  
Version: Q-TOF B.05.01 (B5125)

### Compound Table

| Compound Label    | RT    | Mass     | Abund  | Formula    | Tgt Mass | Diff (ppm) | MFG Formula | DB Formula |
|-------------------|-------|----------|--------|------------|----------|------------|-------------|------------|
| Cpd 1: C17 H12 O3 | 0.144 | 264.0799 | 104627 | C17 H12 O3 | 264.0786 | 4.6        | C17 H12 O3  | C17 H12 O3 |

| Compound Label    | m/z      | RT    | Algorithm       | Mass     |
|-------------------|----------|-------|-----------------|----------|
| Cpd 1: C17 H12 O3 | 265.0871 | 0.144 | Find By Formula | 264.0799 |

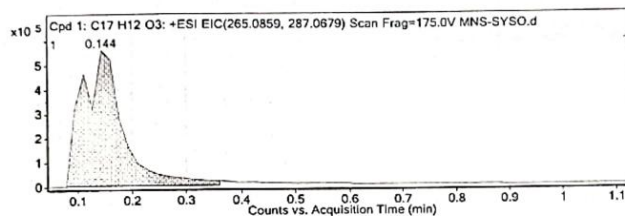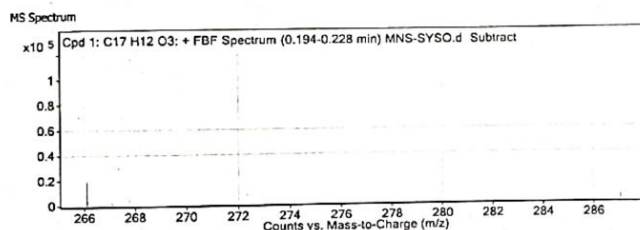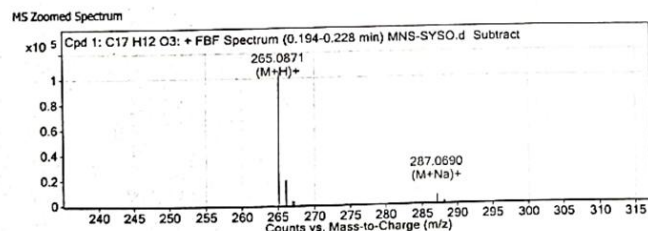

### MS Spectrum Peak List

| m/z      | z | Abund     | Formula    | Ion     |
|----------|---|-----------|------------|---------|
| 265.0871 | 1 | 104626.56 | C17H13O3   | (M+H)+  |
| 266.0905 | 1 | 19418.01  | C17H13O3   | (M+H)+  |
| 267.096  | 1 | 2525.97   | C17H13O3   | (M+H)+  |
| 287.069  | 1 | 4962.73   | C17H12NaO3 | (M+Na)+ |
| 288.0728 | 1 | 2094.22   | C17H12NaO3 | (M+Na)+ |

--- End Of Report ---

## HRMS of BHT adduct

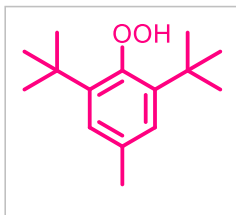

## 1,3-di-tert-butyl-2-hydroperoxy-5-methylbenzene

### Qualitative Compound Report

Data File: MNS-BHT.d  
Sample Type: Sample  
Instrument Name: Instrument 1  
Acq Method: MS Scan.m  
IRM Calibration Status: Success  
Comment:  
Sample Name: MNS-BHT  
Position: PI-F9  
User Name:  
Acquired Time: 21-05-2025 15:17:37  
DA Method: Default.m

Sample Group: Info. 3  
Acquisition SW: 6200 series TOF/6500 series  
Version: Q-TOF B.05.01 (B5125)

#### Compound Table

| Compound Label    | RT    | Mass     | Abund | Formula    | Tgt Mass | Diff (ppm) | MFG Formula | DB Formula |
|-------------------|-------|----------|-------|------------|----------|------------|-------------|------------|
| Cpd 1: C15 H24 O2 | 0.167 | 236.1773 | 11709 | C15 H24 O2 | 236.1776 | -1.28      | C15 H24 O2  | C15 H24 O2 |

| Compound Label    | m/z      | RT    | Algorithm       | Mass     |
|-------------------|----------|-------|-----------------|----------|
| Cpd 1: C15 H24 O2 | 237.1847 | 0.167 | Find By Formula | 236.1773 |

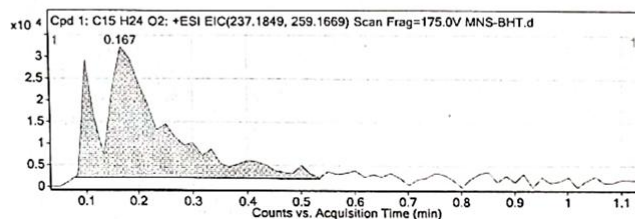

#### MS Spectrum

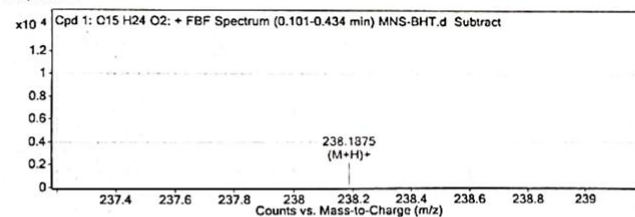

#### MS Zoomed Spectrum

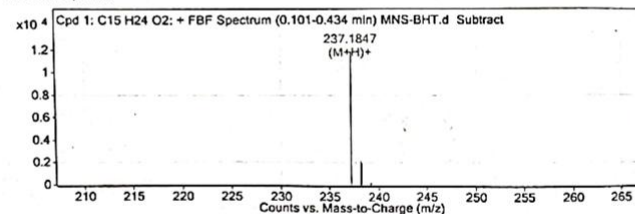

#### MS Spectrum Peak List

| m/z      | z | Abund    | Formula  | Ion    |
|----------|---|----------|----------|--------|
| 237.1847 | 1 | 11709.03 | C15H25O2 | (M+H)+ |
| 238.1875 | 1 | 2192.14  | C15H25O2 | (M+H)+ |
| 239.1879 | 1 | 71.03    | C15H25O2 | (M+H)+ |

--- End Of Report ---
